# Supplementary material for: Comprehensive analysis of DNA methylation patterns in recurrent miscarriage: imprinted/non-imprinted genes and their regulation across sperm and fetal-maternal tissues
Source: PeerJ. 2025 Oct 7;13:e20125. doi: 10.7717/peerj.20125 (PMC12513379; doi:10.7717/peerj.20125)
Supplement: Supplemental Information 2 [file peerj-13-20125-s002.xlsx]

## Sheet: Sample_Info
Table S1. Sequences of primers used for RT-qPCR.
	Forward primer 5’→3’	Reverse primer 5’→3’
LMNA	TGGAGGAGGTGGATGAGGAG	CATTCTGGCGCTTGATCTGC
IL1RAP	TTTGACCGAGACAGTCTGCC	TTTCTAGGCCAGCCTTGAGC
CD59	GGTCATAGCCTGCAGTGCTA	TTTTCCCTCAAGCGGGTTGT
