# Supplementary material for: Comprehensive analysis of DNA methylation patterns in recurrent miscarriage: imprinted/non-imprinted genes and their regulation across sperm and fetal-maternal tissues
Source: PeerJ. 2025 Oct 7;13:e20125. doi: 10.7717/peerj.20125 (PMC12513379; doi:10.7717/peerj.20125)
Supplement: Supplemental Information 3 [file peerj-13-20125-s003.xlsx]

## Sheet: Sample_Info
Table S2. The datasets included in this study.
SampleID	Sample Source	Sample Group	Data Source	Gender
P1	chorionic villi	artificial abortion control	This study	female
P2	chorionic villi	artificial abortion control	This study	female
P3	chorionic villi	artificial abortion control	This study	female
P4	chorionic villi	recurrent miscarriage	This study	female
P5	chorionic villi	recurrent miscarriage	This study	female
P6	chorionic villi	recurrent miscarriage	This study	female
S1	sperm	artificial abortion control	This study	male
S2	sperm	artificial abortion control	This study	male
S3	sperm	artificial abortion control	This study	male
S4	sperm	recurrent miscarriage	This study	male
S5	sperm	recurrent miscarriage	This study	male
S6	sperm	recurrent miscarriage	This study	male
D1	decidua	recurrent miscarriage	GSE141298	female
D2	decidua	recurrent miscarriage	GSE141298	female
D3	decidua	recurrent miscarriage	GSE141298	female
D4	decidua	recurrent miscarriage	GSE141298	female
D5	decidua	recurrent miscarriage	GSE141298	female
D6	decidua	recurrent miscarriage	GSE141298	female
SP1	chorionic villi	recurrent miscarriage	GSE198700	female
SP2	chorionic villi	recurrent miscarriage	GSE198700	female
SP3	chorionic villi	recurrent miscarriage	GSE198700	female
SP4	chorionic villi	recurrent miscarriage	GSE198700	female
SP5	chorionic villi	recurrent miscarriage	GSE198700	female
SP6	decidua	recurrent miscarriage	GSE198700	female
SP7	decidua	recurrent miscarriage	GSE198700	female
SP8	decidua	recurrent miscarriage	GSE198700	female
SP9	decidua	recurrent miscarriage	GSE198700	female
SP10	decidua	recurrent miscarriage	GSE198700	female
SP11	chorionic villi	artificial abortion control	GSE198700	female
SP12	chorionic villi	artificial abortion control	GSE198700	female
SP13	chorionic villi	artificial abortion control	GSE198700	female
SP14	chorionic villi	artificial abortion control	GSE198700	female
SP15	chorionic villi	artificial abortion control	GSE198700	female
SP16	decidua	artificial abortion control	GSE198700	female
SP17	decidua	artificial abortion control	GSE198700	female
SP18	decidua	artificial abortion control	GSE198700	female
SP19	decidua	artificial abortion control	GSE198700	female
SP20	decidua	artificial abortion control	GSE198700	female
