# Supplementary material for: Comprehensive analysis of DNA methylation patterns in recurrent miscarriage: imprinted/non-imprinted genes and their regulation across sperm and fetal-maternal tissues
Source: PeerJ. 2025 Oct 7;13:e20125. doi: 10.7717/peerj.20125 (PMC12513379; doi:10.7717/peerj.20125)
Supplement: Supplemental Information 4 [file peerj-13-20125-s004.xlsx]

## Sheet: 补充TableS2.DMP.chorionic villi
Table S3. The differentially methylated probes (DMPs) identified in chorionic villi between recurrent miscarriage (RM) and artificial accidental termination of pregnancy (AA) groups.
probe	logFC	AveExpr	t	P.Value	adj.P.Val	B	AA_AVG	RM_AVG	deltaBeta	CHR	MAPINFO	Strand	Type	gene	feature	cgi	feat.cgi	UCSC_CpG_Islands_Name	DHS	Enhancer	Phantom	Probe_SNPs	Probe_SNPs_10
cg08924321	0.102956	0.466386	12.9771	1.33732e-09	0.000350947	12.4406	0.414908	0.517864	0.102956	11	35663067	R	II		IGR	opensea	IGR-opensea			TRUE
cg25820223	0.188645	0.626307	11.2831	9.19247e-09	0.000773574	10.5348	0.531985	0.72063	0.188645	7	41925404	F	II		IGR	opensea	IGR-opensea			TRUE
cg05279513	0.180826	0.568236	9.942	5.02421e-08	0.00126334	8.83436	0.477823	0.658649	0.180826	11	9880619	F	II	SBF2	Body	opensea	Body-opensea			TRUE
cg02998075	0.169339	0.539364	9.92783	5.11985e-08	0.00126334	8.81539	0.454694	0.624033	0.169339	7	41875113	R	II		IGR	opensea	IGR-opensea			TRUE
cg25940517	0.191377	0.436384	9.58656	8.11415e-08	0.00127212	8.35161	0.340695	0.532072	0.191377	12	113645509	R	II	IQCD	Body	opensea	Body-opensea			TRUE	low-CpG:112129821-112129910		rs57468632
cg26692791	0.140243	0.697205	9.58217	8.16304e-08	0.00127212	8.34555	0.627084	0.767326	0.140243	1	32593259	F	II	KPNA6	Body	opensea	Body-opensea			TRUE
cg11751719	-0.235052	0.690201	-9.52343	8.84734e-08	0.00128367	8.26437	0.807727	0.572675	-0.235052	6	80023165	F	II		IGR	opensea	IGR-opensea
cg11433866	0.120711	0.743614	9.39862	1.05106e-07	0.00131796	8.09055	0.683258	0.803969	0.120711	12	115126908	R	II		IGR	shore	IGR-shore	chr12:115124729-115125152		TRUE
cg24549289	0.120485	0.724939	9.37941	1.07947e-07	0.00131796	8.06363	0.664696	0.785181	0.120485	5	148809664	R	II	LOC728264	Body	opensea	Body-opensea			TRUE
cg27637382	0.130638	0.786186	9.2804	1.23926e-07	0.00138842	7.92424	0.720867	0.851505	0.130638	11	66672459	F	II	PC	5'UTR	opensea	5'UTR-opensea			TRUE		rs10160714
cg14269525	0.141679	0.646407	9.26167	1.27221e-07	0.00138842	7.89773	0.575567	0.717246	0.141679	14	98214031	R	II		IGR	opensea	IGR-opensea			TRUE
cg08516993	0.136785	0.569898	9.16464	1.45831e-07	0.00141126	7.75977	0.501506	0.638291	0.136785	17	18872598	R	II	SLC5A10	Body	shelf	Body-shelf	chr17:18874684-18874887	TRUE		low-CpG:18813323-18813400
cg02762546	0.112471	0.792343	9.15621	1.47577e-07	0.00141126	7.74774	0.736108	0.848578	0.112471	3	13520685	F	II	HDAC11	TSS1500	shore	TSS1500-shore	chr3:13520912-13521319
cg17339488	0.145825	0.621975	9.09712	1.60462e-07	0.00150037	7.66312	0.549062	0.694887	0.145825	5	174120120	F	II		IGR	opensea	IGR-opensea					rs17796183
cg14115182	0.174666	0.63583	9.02797	1.77063e-07	0.0015513	7.56355	0.548497	0.723163	0.174666	5	174145909	F	II		IGR	shore	IGR-shore	chr5:174147869-174148484		TRUE
cg05641913	0.138402	0.422842	8.99755	1.84932e-07	0.0015513	7.51957	0.353641	0.492043	0.138402	12	57410518	F	II	TAC3	TSS200	opensea	TSS200-opensea
cg26244646	0.14744	0.549799	8.9724	1.91716e-07	0.0015513	7.48312	0.476079	0.623518	0.14744	17	59391924	F	II	BCAS3	Body	opensea	Body-opensea		TRUE	TRUE		rs34250343
cg12429065	0.122406	0.592878	8.94568	1.99211e-07	0.00155406	7.44431	0.531675	0.654082	0.122406	22	36018612	F	II	MB	5'UTR	opensea	5'UTR-opensea			TRUE	low-CpG:34348505-34348587
cg19185339	0.102405	0.715287	8.91903	2.06994e-07	0.00158356	7.40553	0.664085	0.76649	0.102405	13	44971649	R	I	SERP2	3'UTR	opensea	3'UTR-opensea			TRUE
cg04528829	0.159244	0.593559	8.87836	2.19497e-07	0.00159821	7.34616	0.513937	0.673181	0.159244	12	115133294	F	II		IGR	shelf	IGR-shelf	chr12:115135925-115136350				rs79751818
cg24668728	0.102815	0.843928	8.80364	2.4459e-07	0.00162843	7.23656	0.792521	0.895336	0.102815	12	105350182	R	II		IGR	shore	IGR-shore	chr12:105351573-105352055
cg08123816	0.11646	0.827326	8.79498	2.4769e-07	0.00162843	7.22381	0.769096	0.885556	0.11646	15	85640762	R	II	PDE8A	Body	opensea	Body-opensea			TRUE
cg26486174	0.167713	0.585236	8.70039	2.84353e-07	0.00168196	7.08398	0.501379	0.669092	0.167713	6	34202568	R	II		IGR	island	IGR-island	chr6:34202567-34206193
cg12265878	0.245001	0.456543	8.69475	2.86714e-07	0.00168196	7.0756	0.334042	0.579043	0.245001	7	41995442	F	II		IGR	opensea	IGR-opensea		TRUE	TRUE
cg00159243	-0.150688	0.430095	-8.69073	2.88408e-07	0.00168196	7.06963	0.505439	0.354751	-0.150688	12	109023799	R	I	SELPLG	5'UTR	opensea	5'UTR-opensea		TRUE	TRUE
cg24906819	-0.195577	0.350275	-8.68639	2.90251e-07	0.00168196	7.06317	0.448064	0.252486	-0.195577	8	8231531	F	II	PRAGMIN	Body	opensea	Body-opensea		TRUE	TRUE
cg23964724	0.109579	0.568962	8.67837	2.93683e-07	0.00168196	7.05126	0.514173	0.623752	0.109579	18	46386453	F	II	KIAA0427	3'UTR	island	3'UTR-island	chr18:46386266-46386481		TRUE
cg07899076	0.109443	0.570661	8.63356	3.13684e-07	0.00168196	6.98449	0.515939	0.625382	0.109443	7	5675839	R	II	RNF216	Body	opensea	Body-opensea			TRUE
cg00263677	-0.184544	0.750366	-8.58936	3.34819e-07	0.00168196	6.9184	0.842638	0.658094	-0.184544	16	84885230	R	I	CRISPLD2	Body	opensea	Body-opensea		TRUE	TRUE
cg11327657	-0.14899	0.787079	-8.5524	3.5364e-07	0.00169607	6.86295	0.861574	0.712583	-0.14899	21	46388162	F	I	C21orf70	Body	shore	Body-shore	chr21:46387051-46387302	TRUE
cg16345559	0.22448	0.467294	8.48877	3.88712e-07	0.00175867	6.76706	0.355054	0.579534	0.22448	2	213933386	F	II	IKZF2	Body	opensea	Body-opensea			TRUE
cg17988187	0.103544	0.699164	8.47484	3.96867e-07	0.00176502	6.746	0.647393	0.750936	0.103544	2	74612222	R	II	LOC100189589	TSS1500	opensea	TSS1500-opensea
cg14521421	0.131306	0.638065	8.46435	4.03129e-07	0.00176502	6.73012	0.572412	0.703718	0.131306	11	8862019	R	II	ST5	5'UTR	opensea	5'UTR-opensea			TRUE
cg09168805	0.160218	0.32301	8.43756	4.1959e-07	0.00176502	6.68952	0.242901	0.403119	0.160218	1	94514548	R	II	ABCA4	Body	opensea	Body-opensea			TRUE
cg23222446	0.15744	0.592845	8.42346	4.28539e-07	0.00176779	6.66811	0.514125	0.671565	0.15744	6	63991020	R	II	LGSN	Body	opensea	Body-opensea			TRUE
cg24207616	-0.135032	0.785436	-8.38168	4.56259e-07	0.00182176	6.60452	0.852952	0.71792	-0.135032	7	44718623	F	II	OGDH	Body	opensea	Body-opensea		TRUE	TRUE
cg13971484	0.108695	0.546551	8.37172	4.63137e-07	0.00182176	6.58934	0.492203	0.600898	0.108695	9	134353962	R	II	BAT2L1	Body	shelf	Body-shelf	chr9:134350708-134351708	TRUE
cg03977385	0.157666	0.720301	8.34779	4.80126e-07	0.00183655	6.55278	0.641468	0.799135	0.157666	16	48468609	R	II		IGR	opensea	IGR-opensea			TRUE
cg13853141	0.117404	0.596578	8.27623	5.3495e-07	0.00197446	6.44303	0.537876	0.65528	0.117404	2	98329942	F	II	ZAP70	TSS200	opensea	TSS200-opensea
cg18359596	-0.145544	0.69315	-8.26911	5.40753e-07	0.00197852	6.43208	0.765921	0.620378	-0.145544	14	89875471	F	II	FOXN3	Body	opensea	Body-opensea			TRUE
cg01442005	0.126484	0.779353	8.21087	5.9079e-07	0.00208894	6.34223	0.716111	0.842596	0.126484	17	47179278	R	II		IGR	opensea	IGR-opensea		TRUE	TRUE
cg10084554	0.167125	0.354206	8.20077	5.99952e-07	0.00209863	6.3266	0.270644	0.437769	0.167125	10	127991159	F	II	ADAM12	Body	opensea	Body-opensea			TRUE
cg27368333	0.163802	0.292879	8.17844	6.2075e-07	0.00209863	6.29199	0.210978	0.37478	0.163802	3	182677779	F	II	DCUN1D1	Body	opensea	Body-opensea			TRUE		rs9818869
cg13009608	-0.144878	0.313591	-8.17071	6.28124e-07	0.00209863	6.28	0.38603	0.241153	-0.144878	8	81034420	R	II	TPD52	Body	opensea	Body-opensea			TRUE
cg27423627	0.196985	0.670855	8.16619	6.32478e-07	0.00209863	6.27298	0.572362	0.769347	0.196985	3	69299355	R	II	FRMD4B	Body	opensea	Body-opensea			TRUE	low-CpG:69381995-69382046
cg26251585	0.177292	0.625421	8.15812	6.40328e-07	0.00209863	6.26045	0.536776	0.714067	0.177292	7	11456440	R	II	THSD7A	Body	opensea	Body-opensea			TRUE
cg23689630	0.125404	0.638183	8.15726	6.41171e-07	0.00209863	6.25912	0.575481	0.700885	0.125404	10	122578241	R	II		IGR	opensea	IGR-opensea			TRUE
cg26504421	0.102977	0.457429	8.14549	6.52823e-07	0.0021008	6.24082	0.405941	0.508918	0.102977	17	71339361	R	II	SDK2	Body	opensea	Body-opensea		TRUE	TRUE
cg02688643	0.100623	0.749958	8.13763	6.60737e-07	0.0021008	6.22859	0.699647	0.80027	0.100623	4	140585523	F	II	MGST2	TSS1500	opensea	TSS1500-opensea
cg04554613	0.137893	0.587772	8.12948	6.69036e-07	0.0021008	6.21591	0.518826	0.656719	0.137893	2	169945470	R	II	DHRS9	Body	opensea	Body-opensea			TRUE
cg23543795	0.108471	0.795957	8.10564	6.93973e-07	0.00214547	6.17873	0.741722	0.850193	0.108471	7	107965081	R	II	NRCAM	5'UTR	opensea	5'UTR-opensea			TRUE
cg23688350	0.146282	0.715976	8.09453	7.05921e-07	0.00215237	6.16139	0.642835	0.789117	0.146282	2	110317956	R	II	SEPT10	Body	opensea	Body-opensea			TRUE
cg00060800	0.253085	0.509907	8.07934	7.22605e-07	0.00217176	6.13766	0.383364	0.63645	0.253085	5	141600994	R	II		IGR	opensea	IGR-opensea			TRUE
cg18970338	0.162173	0.647207	8.06722	7.36225e-07	0.00219701	6.11869	0.56612	0.728293	0.162173	2	219283823	F	II	VIL1	TSS200	opensea	TSS200-opensea			TRUE	low-CpG:218992053-218992116
cg05075562	0.14828	0.599439	8.03683	7.71561e-07	0.00225801	6.07106	0.525299	0.673579	0.14828	2	42123725	F	II		IGR	opensea	IGR-opensea			TRUE
cg07570280	0.115557	0.802806	8.02248	7.88865e-07	0.00225801	6.04852	0.745028	0.860584	0.115557	2	64982749	R	II		IGR	shelf	IGR-shelf	chr2:64978121-64978924
cg19791727	0.11037	0.660899	8.00164	8.14732e-07	0.00230074	6.01573	0.605714	0.716084	0.11037	10	21798015	R	II		IGR	island	IGR-island	chr10:21797632-21799341
cg27083040	0.130374	0.443979	7.9928	8.25963e-07	0.00231376	6.00182	0.378792	0.509167	0.130374	5	148810061	R	II	MIR145	TSS200	opensea	TSS200-opensea		TRUE	TRUE
cg16393905	0.144547	0.621353	7.93429	9.04573e-07	0.00236664	5.90942	0.549079	0.693626	0.144547	1	201605733	R	II		IGR	opensea	IGR-opensea			TRUE
cg06536806	0.201024	0.482727	7.93359	9.05564e-07	0.00236664	5.90831	0.382216	0.583239	0.201024	5	54081633	F	II		IGR	opensea	IGR-opensea			TRUE		rs79351912
cg24321971	-0.23966	0.519822	-7.92595	9.16408e-07	0.0023802	5.8962	0.639652	0.399992	-0.23966	11	27406919	R	II	LGR4	Body	opensea	Body-opensea			TRUE
cg26927190	0.159216	0.570577	7.91317	9.34849e-07	0.00239849	5.87595	0.490969	0.650186	0.159216	17	76875678	F	II	TIMP2	Body	opensea	Body-opensea		TRUE	TRUE
cg09890930	0.140712	0.654062	7.86976	1.00047e-06	0.00245985	5.80698	0.583706	0.724418	0.140712	12	56149396	R	II	SARNP	Body	opensea	Body-opensea			TRUE
cg20669292	0.132686	0.761808	7.86909	1.00152e-06	0.00245985	5.80592	0.695465	0.828151	0.132686	17	40823420	F	I	PLEKHH3	Body	island	Body-island	chr17:40821935-40823573		TRUE
cg17487784	0.17418	0.696693	7.7856	1.14188e-06	0.00268416	5.67255	0.609603	0.783783	0.17418	8	19369752	F	II	CSGALNACT1	5'UTR	opensea	5'UTR-opensea			TRUE
cg23856536	0.160231	0.519092	7.76259	1.1841e-06	0.00275018	5.63563	0.438977	0.599208	0.160231	7	101384349	F	II		IGR	shelf	IGR-shelf	chr7:101386554-101387122				rs17135758
cg13448775	0.112278	0.727148	7.75401	1.20025e-06	0.00275968	5.62185	0.671009	0.783287	0.112278	9	116413170	F	II		IGR	opensea	IGR-opensea		TRUE	TRUE
cg09072230	0.109262	0.619543	7.73475	1.23738e-06	0.00279917	5.59086	0.564912	0.674174	0.109262	11	16918440	F	II	PLEKHA7	Body	opensea	Body-opensea			TRUE
cg15082983	0.185053	0.541918	7.70753	1.29192e-06	0.00289022	5.54699	0.449391	0.634444	0.185053	17	39894780	F	II		IGR	shelf	IGR-shelf	chr17:39889956-39891489		TRUE		rs11385525
cg01621943	0.131672	0.752583	7.70445	1.29824e-06	0.00289022	5.54202	0.686747	0.818419	0.131672	17	53531409	R	II		IGR	opensea	IGR-opensea			TRUE
cg18325315	-0.25597	0.371374	-7.65746	1.39892e-06	0.0030092	5.46604	0.499359	0.243389	-0.25597	7	73897230	R	II	GTF2IRD1	5'UTR	shelf	5'UTR-shelf	chr7:73894815-73895110	TRUE
cg05797224	0.114061	0.806651	7.653	1.40889e-06	0.0030092	5.45881	0.74962	0.863681	0.114061	1	94277532	R	II		IGR	opensea	IGR-opensea			TRUE
cg01976921	0.100022	0.824181	7.64433	1.42849e-06	0.00302039	5.44476	0.77417	0.874192	0.100022	8	38342087	R	II		IGR	opensea	IGR-opensea			TRUE
cg23534301	0.161113	0.671927	7.59225	1.55245e-06	0.00315624	5.36008	0.591371	0.752484	0.161113	17	28098852	R	II	SSH2	Body	opensea	Body-opensea			TRUE
cg00118507	0.119828	0.729213	7.59213	1.55275e-06	0.00315624	5.35989	0.669299	0.789127	0.119828	1	113215934	F	II	MOV10	TSS1500	shore	TSS1500-shore	chr1:113217475-113218097		TRUE
cg03422749	0.163642	0.630856	7.57811	1.58802e-06	0.00321145	5.33703	0.549035	0.712676	0.163642	4	185677549	F	II	ACSL1	3'UTR	opensea	3'UTR-opensea			TRUE
cg17709464	0.144932	0.613988	7.57126	1.60553e-06	0.00321145	5.32587	0.541522	0.686455	0.144932	6	158927809	F	II	TULP4	3'UTR	opensea	3'UTR-opensea		TRUE
cg03190661	0.108007	0.767256	7.56936	1.61044e-06	0.00321145	5.32277	0.713252	0.821259	0.108007	17	76126702	F	II	TMC8	TSS200	shore	TSS200-shore	chr17:76127521-76128406
cg02637031	0.149302	0.519804	7.54419	1.67687e-06	0.00327005	5.28163	0.445153	0.594455	0.149302	5	114887230	R	II		IGR	opensea	IGR-opensea			TRUE
cg22180580	0.119499	0.191505	7.54351	1.67868e-06	0.00327005	5.28053	0.131755	0.251255	0.119499	6	138867046	F	II	NHSL1	Body	opensea	Body-opensea			TRUE	low-CpG:138908496-138908826	rs79908395
cg19963544	-0.238474	0.435788	-7.53693	1.69656e-06	0.00328964	5.26975	0.555024	0.316551	-0.238474	2	106483650	R	II	NCK2	Body	opensea	Body-opensea			TRUE
cg04060356	0.142108	0.614804	7.53298	1.70737e-06	0.00329541	5.26329	0.54375	0.685858	0.142108	20	52226170	R	II		IGR	opensea	IGR-opensea			TRUE
cg08632767	0.130032	0.608337	7.51728	1.75106e-06	0.00332117	5.23757	0.543321	0.673352	0.130032	15	25923673	R	II		IGR	opensea	IGR-opensea			TRUE
cg13860360	0.154549	0.561698	7.50935	1.77359e-06	0.00333088	5.22456	0.484424	0.638973	0.154549	13	33846010	F	II	STARD13	Body	opensea	Body-opensea			TRUE
cg07139162	0.192891	0.782424	7.49642	1.81094e-06	0.00335674	5.20335	0.685978	0.87887	0.192891	16	70465351	F	II	ST3GAL2	5'UTR	opensea	5'UTR-opensea			TRUE
cg12950181	-0.211446	0.497999	-7.46787	1.89642e-06	0.00343942	5.1564	0.603723	0.392276	-0.211446	5	93447648	R	II	FAM172A	TSS1500	shore	TSS1500-shore	chr5:93446953-93447436
cg25219246	-0.162148	0.52386	-7.4622	1.91389e-06	0.00344145	5.14707	0.604933	0.442786	-0.162148	1	44053380	F	II	PTPRF	Body	shelf	Body-shelf	chr1:44056755-44057179	TRUE	TRUE		rs34051044
cg07825483	0.110151	0.785486	7.44624	1.964e-06	0.00345768	5.12075	0.730411	0.840562	0.110151	1	60130046	F	II	FGGY	Body	opensea	Body-opensea			TRUE
cg03908676	0.173232	0.460075	7.43268	2.00762e-06	0.00347629	5.09839	0.373459	0.54669	0.173232	11	10590282	F	II	LYVE1	1stExon	opensea	1stExon-opensea			TRUE
cg01128736	0.108151	0.762115	7.4266	2.02753e-06	0.00347837	5.08835	0.70804	0.816191	0.108151	6	4461158	F	II		IGR	opensea	IGR-opensea			TRUE
cg04515533	0.136741	0.68905	7.42103	2.04595e-06	0.00347837	5.07914	0.620679	0.75742	0.136741	1	231295786	F	II		IGR	shore	IGR-shore	chr1:231296559-231297345				rs6661297
cg20709275	0.112499	0.669314	7.41664	2.06059e-06	0.00347837	5.07189	0.613064	0.725563	0.112499	15	82331978	R	II		IGR	shelf	IGR-shelf	chr15:82335472-82339937
cg08062233	-0.111409	0.696506	-7.4088	2.08698e-06	0.00349809	5.05893	0.75221	0.640801	-0.111409	19	39600974	F	II	PAPL	3'UTR	opensea	3'UTR-opensea		TRUE
cg17835016	0.103465	0.66462	7.40217	2.10961e-06	0.0035085	5.04795	0.612887	0.716352	0.103465	13	113784082	F	II	F10	Body	island	Body-island	chr13:113783886-113784702		TRUE			rs45559232
cg15662184	0.147138	0.81341	7.38917	2.1547e-06	0.00353042	5.02642	0.739841	0.886979	0.147138	19	10464842	F	I	TYK2	Body	island	Body-island	chr19:10464666-10464927	TRUE				rs35018800
cg01021631	0.150529	0.692698	7.3887	2.15636e-06	0.00353042	5.02564	0.617433	0.767962	0.150529	1	56902689	F	II		IGR	opensea	IGR-opensea			TRUE		rs11802109
cg08529179	0.105355	0.798439	7.38076	2.1844e-06	0.00356248	5.01248	0.745761	0.851116	0.105355	11	64176908	R	II		IGR	opensea	IGR-opensea			TRUE
cg14788673	0.133533	0.600249	7.35194	2.28951e-06	0.00361984	4.96463	0.533483	0.667016	0.133533	1	60164280	R	II	FGGY	Body	opensea	Body-opensea			TRUE
cg12280065	0.127429	0.21856	7.35187	2.28975e-06	0.00361984	4.96452	0.154846	0.282275	0.127429	17	40687885	R	II	NAGLU	TSS200	shore	TSS200-shore	chr17:40688033-40688745
cg27641628	-0.15379	0.15494	-7.3478	2.30501e-06	0.00361984	4.95776	0.231835	0.0780445	-0.15379	7	134833031	R	II	TMEM140	5'UTR	opensea	5'UTR-opensea			TRUE
cg08494871	0.168027	0.68386	7.34603	2.31169e-06	0.00361984	4.95482	0.599847	0.767874	0.168027	16	19862888	F	II	IQCK	Body	opensea	Body-opensea			TRUE
cg22957339	-0.161888	0.660607	-7.33566	2.35119e-06	0.00362511	4.93756	0.741551	0.579663	-0.161888	15	31246272	F	II	MTMR10	Body	opensea	Body-opensea		TRUE	TRUE		rs80243678
cg06487082	0.190206	0.432484	7.32383	2.39714e-06	0.00363667	4.91786	0.337381	0.527586	0.190206	18	56530106	R	II	ZNF532	1stExon	shore	1stExon-shore	chr18:56530395-56531288	TRUE
cg01101911	0.103469	0.702483	7.32256	2.40212e-06	0.00363667	4.91575	0.650749	0.754217	0.103469	6	35360715	F	II	PPARD	5'UTR	opensea	5'UTR-opensea			TRUE		rs79882801
cg01310120	0.104966	0.250729	7.3149	2.43241e-06	0.00363667	4.90299	0.198246	0.303212	0.104966	5	148810103	F	II	MIR145	TSS200	opensea	TSS200-opensea		TRUE	TRUE
cg26027052	-0.143468	0.228611	-7.31331	2.43875e-06	0.00363667	4.90033	0.300345	0.156877	-0.143468	6	36821364	R	II		IGR	opensea	IGR-opensea			TRUE
cg05346256	0.152229	0.562341	7.31071	2.44915e-06	0.00363667	4.896	0.486227	0.638456	0.152229	12	25959372	R	II		IGR	opensea	IGR-opensea			TRUE
cg18527241	0.132686	0.344796	7.30617	2.46743e-06	0.00363667	4.88843	0.278453	0.411139	0.132686	7	105319558	F	II	ATXN7L1	Body	opensea	Body-opensea		TRUE
cg18278519	0.230023	0.482144	7.30242	2.48267e-06	0.00363667	4.88216	0.367132	0.597155	0.230023	10	98069610	R	II	DNTT	Body	opensea	Body-opensea			TRUE
cg22119466	0.131743	0.372017	7.28427	2.55765e-06	0.00363667	4.85186	0.306146	0.437889	0.131743	2	9331371	R	II		IGR	opensea	IGR-opensea		TRUE	TRUE
cg13014457	0.11434	0.8529	7.28162	2.56881e-06	0.00363667	4.84743	0.79573	0.91007	0.11434	11	115333041	F	II	CADM1	Body	opensea	Body-opensea			TRUE
cg07270423	0.121885	0.54161	7.27608	2.59228e-06	0.00363667	4.83817	0.480667	0.602552	0.121885	11	123242457	R	II		IGR	opensea	IGR-opensea			TRUE
cg16473141	0.119481	0.704854	7.27594	2.5929e-06	0.00363667	4.83792	0.645114	0.764595	0.119481	14	24641501	R	II	REC8	1stExon	island	1stExon-island	chr14:24641053-24642220	TRUE	TRUE
cg04478875	0.104255	0.742216	7.25674	2.67601e-06	0.00363668	4.80579	0.690088	0.794343	0.104255	5	142023774	F	II	FGF1	5'UTR	opensea	5'UTR-opensea			TRUE
cg20889322	-0.13128	0.424264	-7.25017	2.70512e-06	0.00363668	4.79477	0.489903	0.358624	-0.13128	11	65196622	F	I		IGR	opensea	IGR-opensea			TRUE	low-CpG:64952070-64953288
cg07618462	0.131852	0.796561	7.24737	2.71762e-06	0.00363668	4.79008	0.730635	0.862487	0.131852	5	142499847	F	II	ARHGAP26	Body	opensea	Body-opensea			TRUE
cg15723222	0.137678	0.269957	7.23963	2.75248e-06	0.00363668	4.7771	0.201118	0.338797	0.137678	17	59222476	R	I	BCAS3	Body	opensea	Body-opensea			TRUE
cg14818812	0.172055	0.44564	7.23003	2.79637e-06	0.00363668	4.76099	0.359613	0.531667	0.172055	8	142362180	F	II		IGR	opensea	IGR-opensea		TRUE	TRUE
cg11876492	0.155236	0.794208	7.22917	2.80034e-06	0.00363668	4.75954	0.71659	0.871826	0.155236	12	93042545	F	II		IGR	opensea	IGR-opensea			TRUE
cg13914708	0.104908	0.654058	7.22034	2.8414e-06	0.00364383	4.74472	0.601604	0.706512	0.104908	2	15804963	F	I		IGR	opensea	IGR-opensea
cg02668999	0.104247	0.835659	7.21109	2.88513e-06	0.00366756	4.72916	0.783535	0.887782	0.104247	2	74924928	R	II		IGR	opensea	IGR-opensea			TRUE
cg08617135	0.118406	0.757903	7.17596	3.05764e-06	0.00373738	4.67002	0.6987	0.817107	0.118406	6	9516073	R	II		IGR	opensea	IGR-opensea			TRUE
cg07028620	0.157624	0.793576	7.17515	3.06174e-06	0.00373738	4.66865	0.714764	0.872388	0.157624	8	141071469	R	II	TRAPPC9	Body	opensea	Body-opensea			TRUE
cg07226162	0.110156	0.324661	7.17158	3.0799e-06	0.00373738	4.66263	0.269583	0.379739	0.110156	10	112293247	F	II		IGR	shelf	IGR-shelf	chr10:112289947-112290305
cg18741439	0.202042	0.587097	7.16844	3.096e-06	0.00373738	4.65732	0.486076	0.688119	0.202042	8	19310134	R	II	CSGALNACT1	Body	opensea	Body-opensea			TRUE
cg20138922	0.119938	0.644917	7.16559	3.11064e-06	0.00373738	4.65251	0.584949	0.704886	0.119938	1	23177414	R	II	EPHB2	Body	opensea	Body-opensea			TRUE
cg09241455	0.101697	0.62602	7.16103	3.13423e-06	0.00373738	4.64482	0.575172	0.676869	0.101697	4	37667583	F	II	RELL1	Body	opensea	Body-opensea			TRUE
cg23539753	-0.169848	0.162661	-7.14117	3.23923e-06	0.00379924	4.61126	0.247585	0.0777373	-0.169848	2	231280698	R	II	SP100	TSS200	opensea	TSS200-opensea
cg13280063	0.10899	0.757153	7.13596	3.26739e-06	0.00379924	4.60244	0.702658	0.811648	0.10899	6	100036136	R	II		IGR	shore	IGR-shore	chr6:100036541-100037147					rs674151
cg21548220	0.125107	0.506037	7.13495	3.27286e-06	0.00379924	4.60073	0.443484	0.56859	0.125107	19	46284048	R	II	DMPK	Body	shore	Body-shore	chr19:46282544-46283127		TRUE
cg13960999	0.181119	0.524107	7.13151	3.29161e-06	0.00379924	4.59491	0.433548	0.614667	0.181119	13	73823513	R	II		IGR	opensea	IGR-opensea			TRUE
cg02837825	0.219288	0.591696	7.13131	3.2927e-06	0.00379924	4.59458	0.482052	0.70134	0.219288	6	9607150	R	II		IGR	opensea	IGR-opensea			TRUE
cg05356099	0.146754	0.380267	7.10155	3.45984e-06	0.00390295	4.54414	0.306891	0.453644	0.146754	17	25603799	F	II		IGR	opensea	IGR-opensea			TRUE
cg13134634	0.139329	0.525373	7.09513	3.49704e-06	0.00390295	4.53325	0.455708	0.595037	0.139329	13	76207486	R	II	LMO7	Body	shelf	Body-shelf	chr13:76209540-76211213	TRUE
cg23878494	0.106159	0.298917	7.08963	3.52924e-06	0.00390919	4.52391	0.245837	0.351997	0.106159	11	63687937	F	I		IGR	shore	IGR-shore	chr11:63685489-63685968
cg01678802	0.199276	0.320092	7.08175	3.57594e-06	0.00391831	4.51052	0.220454	0.41973	0.199276	7	51393192	R	II		IGR	opensea	IGR-opensea			TRUE
cg11051899	0.118963	0.683607	7.06994	3.6471e-06	0.00394492	4.49045	0.624125	0.743088	0.118963	8	23385905	R	II	SLC25A37	TSS1500	shore	TSS1500-shore	chr8:23386220-23387386					rs79788105
cg00059459	0.132545	0.625684	7.06792	3.65947e-06	0.00394815	4.487	0.559412	0.691957	0.132545	1	8343575	R	II		IGR	opensea	IGR-opensea			TRUE
cg18237594	0.119939	0.730253	7.05163	3.76044e-06	0.00399918	4.45927	0.670283	0.790222	0.119939	18	14435120	F	II		IGR	shelf	IGR-shelf	chr18:14430638-14431567	TRUE
cg15711288	0.175407	0.502862	7.05074	3.76604e-06	0.00399918	4.45776	0.415158	0.590565	0.175407	3	150500902	F	II		IGR	shelf	IGR-shelf	chr3:150496798-150497432
cg07026490	0.100081	0.414678	7.04959	3.77331e-06	0.00399918	4.45579	0.364638	0.464719	0.100081	16	57837114	R	II	KIFC3	TSS1500	shore	TSS1500-shore	chr16:57835955-57836989	TRUE
cg05189804	0.207804	0.374367	7.03825	3.84561e-06	0.00404525	4.43645	0.270465	0.478269	0.207804	11	123065246	R	II	ASAM	Body	shore	Body-shore	chr11:123065426-123066184	TRUE
cg12418043	0.110698	0.694376	7.01556	3.99461e-06	0.00409928	4.39773	0.639027	0.749724	0.110698	5	141900671	R	II		IGR	opensea	IGR-opensea			TRUE
cg01428849	0.118266	0.821055	7.00837	4.04311e-06	0.00409928	4.38543	0.761922	0.880188	0.118266	10	105411075	R	II	SH3PXD2A	Body	opensea	Body-opensea			TRUE
cg01160695	0.102651	0.706248	7.00232	4.0844e-06	0.00412127	4.37508	0.654923	0.757574	0.102651	7	862799	F	II	UNC84A	5'UTR	island	5'UTR-island	chr7:862515-862800		TRUE			rs11766365
cg04710768	0.21453	0.415179	6.99406	4.14145e-06	0.0041589	4.36095	0.307914	0.522444	0.21453	5	71803282	R	II	ZNF366	TSS200	opensea	TSS200-opensea
cg24699719	0.110278	0.54084	6.99022	4.16825e-06	0.00417584	4.35438	0.485701	0.595979	0.110278	5	74913041	R	II		IGR	opensea	IGR-opensea			TRUE
cg03679394	0.132602	0.746164	6.97435	4.28097e-06	0.00424304	4.32719	0.679864	0.812465	0.132602	11	70516997	F	II	SHANK2	Body	opensea	Body-opensea			TRUE
cg19558802	0.225931	0.582872	6.97165	4.30047e-06	0.00424304	4.32256	0.469907	0.695837	0.225931	15	51695713	R	II	GLDN	Body	opensea	Body-opensea			TRUE
cg23732483	0.100126	0.715931	6.9707	4.30738e-06	0.00424304	4.32093	0.665868	0.765993	0.100126	3	48965611	F	II	ARIH2	Body	opensea	Body-opensea			TRUE
cg24502904	0.108244	0.279779	6.96587	4.34254e-06	0.00425918	4.31265	0.225657	0.333901	0.108244	12	53399544	R	I	EIF4B	TSS1500	shore	TSS1500-shore	chr12:53399872-53400896
cg12630243	0.119478	0.844719	6.94884	4.46896e-06	0.00430639	4.28341	0.78498	0.904458	0.119478	3	150067033	R	II		IGR	opensea	IGR-opensea			TRUE
cg00957901	0.123071	0.125197	6.94701	4.48279e-06	0.00430639	4.28026	0.0636613	0.186732	0.123071	4	41614842	R	II	LIMCH1	TSS200	opensea	TSS200-opensea			TRUE	low-CpG:41309554-41309694
cg04077047	0.138949	0.643435	6.94452	4.50161e-06	0.00431463	4.27599	0.573961	0.71291	0.138949	2	75361945	R	II	TACR1	Body	opensea	Body-opensea			TRUE
cg14402562	-0.242987	0.669489	-6.94241	4.51769e-06	0.00432019	4.27236	0.790983	0.547996	-0.242987	11	8945810	R	II	C11orf16	Body	opensea	Body-opensea			TRUE
cg21169267	-0.164457	0.693713	-6.92969	4.61571e-06	0.00434481	4.25049	0.775941	0.611484	-0.164457	9	130298299	R	II	FAM129B	Body	opensea	Body-opensea		TRUE	TRUE
cg26187962	0.125845	0.637092	6.91174	4.75787e-06	0.00440957	4.21958	0.574169	0.700014	0.125845	1	226011953	F	II	EPHX1	TSS1500	opensea	TSS1500-opensea			TRUE
cg18953039	-0.17318	0.611268	-6.89829	4.86747e-06	0.00446504	4.19638	0.697858	0.524678	-0.17318	10	1031432	F	II		IGR	shelf	IGR-shelf	chr10:1033790-1034615
cg25026755	0.111267	0.456508	6.89589	4.88723e-06	0.00447038	4.19225	0.400875	0.512142	0.111267	5	57702195	F	II		IGR	opensea	IGR-opensea			TRUE		rs79042482
cg02774282	-0.182366	0.689205	-6.89158	4.9231e-06	0.00448824	4.1848	0.780387	0.598022	-0.182366	6	109615419	R	II	CCDC162	TSS200	shelf	TSS200-shelf	chr6:109611449-109612230
cg14288326	0.163437	0.285887	6.89098	4.92809e-06	0.00448824	4.18376	0.204168	0.367605	0.163437	7	77042644	R	II	PION	Body	shelf	Body-shelf	chr7:77044840-77045719		TRUE
cg12558347	-0.225944	0.410691	-6.88379	4.9885e-06	0.00449477	4.17135	0.523663	0.297719	-0.225944	5	131724271	F	II	SLC22A5	Body	opensea	Body-opensea			TRUE
cg18825531	-0.177904	0.177024	-6.88251	4.99934e-06	0.00449477	4.16914	0.265976	0.0880721	-0.177904	11	62321136	F	II		IGR	opensea	IGR-opensea		TRUE	TRUE
cg00925339	0.182335	0.303098	6.87911	5.02825e-06	0.0045099	4.16326	0.21193	0.394265	0.182335	6	86162725	F	II	NT5E	Body	shelf	Body-shelf	chr6:86159425-86160395		TRUE
cg22137772	0.157868	0.35065	6.8734	5.07713e-06	0.0045099	4.15341	0.271715	0.429584	0.157868	3	150755800	R	II	CLRN1OS	Body	opensea	Body-opensea		TRUE	TRUE
cg01765406	-0.107752	0.781219	-6.86326	5.16531e-06	0.00452757	4.13586	0.835094	0.727343	-0.107752	2	129231478	R	II		IGR	shelf	IGR-shelf	chr2:129228601-129228807	TRUE	TRUE
cg26110900	0.17257	0.699257	6.86217	5.17483e-06	0.00452757	4.13398	0.612972	0.785542	0.17257	10	62073066	F	II	ANK3	Body	opensea	Body-opensea			TRUE
cg24142464	0.130626	0.159654	6.85633	5.22646e-06	0.00453978	4.12387	0.0943409	0.224967	0.130626	1	40040489	R	II	PABPC4	Body	shore	Body-shore	chr1:40041317-40042667		TRUE
cg17112382	0.120385	0.717144	6.84992	5.28368e-06	0.00455893	4.11277	0.656952	0.777336	0.120385	10	21676930	F	II		IGR	opensea	IGR-opensea					rs74120937
cg07712663	0.145312	0.563185	6.8453	5.32533e-06	0.0045617	4.10477	0.490529	0.635841	0.145312	2	16789846	F	II	FAM49A	5'UTR	opensea	5'UTR-opensea			TRUE		rs76820058
cg26194447	0.125573	0.783276	6.84435	5.33391e-06	0.0045617	4.10313	0.720489	0.846062	0.125573	14	54900991	R	II	CNIH	Body	opensea	Body-opensea			TRUE
cg18685594	0.1027	0.407945	6.83465	5.42271e-06	0.0045617	4.08631	0.356595	0.459296	0.1027	6	134211217	F	II	TCF21	Body	island	Body-island	chr6:134210639-134211218	TRUE
cg06884199	0.111327	0.21899	6.83348	5.43352e-06	0.0045617	4.08428	0.163327	0.274654	0.111327	5	174120335	R	II		IGR	opensea	IGR-opensea			TRUE
cg11903057	0.152648	0.650784	6.8327	5.44065e-06	0.0045617	4.08294	0.57446	0.727108	0.152648	4	40198776	F	II	RHOH	5'UTR	opensea	5'UTR-opensea			TRUE		rs10016264
cg26039623	0.11825	0.468275	6.83219	5.44541e-06	0.0045617	4.08205	0.40915	0.5274	0.11825	4	40485458	F	II	RBM47	5'UTR	opensea	5'UTR-opensea			TRUE		rs79524349
cg04629204	0.108258	0.23148	6.83042	5.46186e-06	0.0045617	4.07898	0.177351	0.285609	0.108258	1	26348325	F	II	EXTL1	1stExon	opensea	1stExon-opensea			TRUE		rs35656484
cg09518969	0.120827	0.674318	6.8153	5.60434e-06	0.00457916	4.05274	0.613904	0.734731	0.120827	11	63378005	F	II	PLA2G16	Body	shelf	Body-shelf	chr11:63381143-63382096		TRUE
cg19425114	0.145788	0.78546	6.81373	5.61941e-06	0.00457916	4.05	0.712566	0.858354	0.145788	11	58907379	F	I		IGR	shelf	IGR-shelf	chr11:58910127-58910584
cg15015109	-0.107564	0.848612	-6.81329	5.62354e-06	0.00457916	4.04925	0.902394	0.79483	-0.107564	17	65136480	R	II	HELZ	Body	opensea	Body-opensea			TRUE
cg02583796	0.123087	0.794622	6.81299	5.62648e-06	0.00457916	4.04872	0.733078	0.856165	0.123087	1	226375174	R	II	ACBD3	TSS1500	shore	TSS1500-shore	chr1:226374035-226374760
cg12051613	0.106934	0.736054	6.80959	5.65921e-06	0.00458893	4.04281	0.682587	0.789521	0.106934	3	48487347	R	II	ATRIP	TSS1500	shore	TSS1500-shore	chr3:48487793-48488581					rs9876781
cg01791798	0.149145	0.844356	6.77291	6.02501e-06	0.00480135	3.97899	0.769784	0.918928	0.149145	5	66338067	R	II	MAST4	Body	opensea	Body-opensea			TRUE
cg08621773	0.133709	0.523124	6.76609	6.09565e-06	0.00482875	3.96711	0.45627	0.589978	0.133709	2	25438675	F	II		IGR	shore	IGR-shore	chr2:25438725-25439276	TRUE
cg25718766	0.119119	0.457293	6.76373	6.12032e-06	0.00482875	3.96299	0.397733	0.516853	0.119119	12	115104864	F	II		IGR	island	IGR-island	chr12:115104848-115105548		TRUE
cg04359602	0.118137	0.820398	6.75371	6.22628e-06	0.00487859	3.9455	0.761329	0.879466	0.118137	14	21494547	F	II	NDRG2	TSS1500	shore	TSS1500-shore	chr14:21492735-21494270	TRUE	TRUE
cg13869366	0.13278	0.615174	6.74478	6.32225e-06	0.00492688	3.92991	0.548784	0.681564	0.13278	11	7869666	R	II	OR5E1P	TSS1500	opensea	TSS1500-opensea
cg14413904	0.166505	0.694806	6.74426	6.32789e-06	0.00492688	3.929	0.611553	0.778058	0.166505	10	62423377	R	II		IGR	opensea	IGR-opensea			TRUE
cg00116430	0.163178	0.439165	6.74036	6.37032e-06	0.00492688	3.92219	0.357576	0.520754	0.163178	1	94188268	F	I		IGR	opensea	IGR-opensea			TRUE
cg15544071	0.106728	0.574497	6.74027	6.3713e-06	0.00492688	3.92204	0.521133	0.627861	0.106728	5	38528510	R	II	LIFR	Body	opensea	Body-opensea			TRUE
cg18004847	-0.151159	0.357599	-6.73963	6.37826e-06	0.00492688	3.92093	0.433178	0.282019	-0.151159	19	1155056	F	II	SBNO2	5'UTR	island	5'UTR-island	chr19:1155020-1155305		TRUE
cg05958910	0.12611	0.573562	6.72642	6.52451e-06	0.00500052	3.89782	0.510507	0.636617	0.12611	10	21796441	F	II		IGR	shore	IGR-shore	chr10:21797632-21799341
cg09162993	0.139489	0.63218	6.71008	6.71024e-06	0.00507943	3.86922	0.562435	0.701924	0.139489	5	127922712	F	II		IGR	opensea	IGR-opensea			TRUE
cg14483244	0.125548	0.483366	6.70784	6.73612e-06	0.00507943	3.8653	0.420592	0.54614	0.125548	17	42173343	R	II	HDAC5	Body	opensea	Body-opensea			TRUE
cg16446738	-0.191105	0.452989	-6.69971	6.83092e-06	0.00512337	3.85106	0.548541	0.357437	-0.191105	15	51176931	F	II		IGR	opensea	IGR-opensea			TRUE
cg00826603	0.107811	0.677632	6.68977	6.94878e-06	0.00516573	3.83362	0.623726	0.731537	0.107811	1	32231019	F	II	BAI2	TSS1500	shore	TSS1500-shore	chr1:32228347-32230252	TRUE	TRUE
cg19200592	0.151173	0.476774	6.68604	6.99352e-06	0.00517831	3.82708	0.401187	0.55236	0.151173	3	32877042	F	II	TRIM71	Body	opensea	Body-opensea			TRUE
cg09119776	0.104849	0.38764	6.6799	7.0679e-06	0.00518946	3.8163	0.335215	0.440064	0.104849	10	104387263	F	II	SUFU	Body	opensea	Body-opensea		TRUE	TRUE
cg10301695	0.140874	0.657347	6.67882	7.08102e-06	0.00518946	3.81441	0.58691	0.727784	0.140874	12	6233717	F	II	VWF	1stExon	opensea	1stExon-opensea			TRUE
cg01928231	0.155044	0.525785	6.67795	7.0917e-06	0.00518946	3.81288	0.448263	0.603307	0.155044	6	3502698	R	II		IGR	opensea	IGR-opensea			TRUE			rs34125650
cg01110765	0.144477	0.699068	6.67562	7.12017e-06	0.00519194	3.80879	0.626829	0.771307	0.144477	X	40016611	R	II	BCOR	5'UTR	shore	5'UTR-shore	chrX:40017372-40017884	TRUE
cg05419096	0.111794	0.829126	6.67476	7.13081e-06	0.00519194	3.80727	0.773229	0.885023	0.111794	13	107467865	F	II		IGR	opensea	IGR-opensea			TRUE
cg19086110	0.123366	0.840278	6.67265	7.15679e-06	0.00519194	3.80357	0.778596	0.901961	0.123366	7	20269648	R	II		IGR	opensea	IGR-opensea			TRUE
cg23363263	-0.159064	0.350751	-6.66765	7.21867e-06	0.00522386	3.79479	0.430283	0.271219	-0.159064	2	224751989	F	II	WDFY1	Body	opensea	Body-opensea			TRUE
cg07359183	-0.143877	0.34027	-6.65385	7.39269e-06	0.00526076	3.77052	0.412208	0.268331	-0.143877	1	208358018	R	II	PLXNA2	Body	opensea	Body-opensea		TRUE	TRUE
cg11254532	0.179063	0.614916	6.64895	7.45547e-06	0.00526185	3.7619	0.525385	0.704448	0.179063	1	61520399	F	I		IGR	shore	IGR-shore	chr1:61519352-61519971
cg04039957	0.124655	0.748402	6.64638	7.48867e-06	0.00526185	3.75737	0.686075	0.81073	0.124655	7	143013207	R	II	CLCN1	TSS200	opensea	TSS200-opensea
cg23304023	0.174467	0.446774	6.64614	7.4918e-06	0.00526185	3.75695	0.359541	0.534008	0.174467	10	123949949	F	I	TACC2	Body	opensea	Body-opensea			TRUE
cg19402236	0.178283	0.695809	6.64192	7.54658e-06	0.00526185	3.74952	0.606667	0.78495	0.178283	13	28982820	F	II	FLT1	Body	opensea	Body-opensea			TRUE
cg15931673	0.104247	0.758365	6.6414	7.55329e-06	0.00526185	3.74862	0.706241	0.810489	0.104247	1	20084760	R	II	TMCO4	Body	opensea	Body-opensea		TRUE	TRUE
cg12508078	0.116475	0.867246	6.63642	7.61868e-06	0.0052806	3.73983	0.809009	0.925484	0.116475	17	27505845	F	II	MYO18A	5'UTR	shore	5'UTR-shore	chr17:27506889-27507607		TRUE
cg03406778	0.100713	0.549912	6.63252	7.67024e-06	0.00528374	3.73296	0.499555	0.600268	0.100713	7	1601923	F	I		IGR	opensea	IGR-opensea		TRUE			rs34450585	rs35197081
cg07695566	0.104212	0.594591	6.63234	7.67261e-06	0.00528374	3.73264	0.542485	0.646697	0.104212	17	61525112	F	I	CYB561	TSS1500	shore	TSS1500-shore	chr17:61523000-61524470		TRUE
cg00736406	0.134432	0.70971	6.62722	7.74087e-06	0.00528498	3.72362	0.642494	0.776926	0.134432	16	23504930	R	II	GGA2	Body	opensea	Body-opensea			TRUE
cg23452458	0.107693	0.628462	6.62516	7.76852e-06	0.00528498	3.71998	0.574615	0.682308	0.107693	17	45899388	F	II	OSBPL7	TSS1500	opensea	TSS1500-opensea			TRUE
cg16185386	-0.154266	0.506603	-6.62468	7.77489e-06	0.00528498	3.71915	0.583736	0.429469	-0.154266	13	29077350	F	II		IGR	opensea	IGR-opensea			TRUE
cg14691963	0.106093	0.79374	6.61397	7.92037e-06	0.00532622	3.70026	0.740694	0.846787	0.106093	3	149322659	F	II	WWTR1	Body	opensea	Body-opensea			TRUE
cg25358250	0.153377	0.644955	6.6137	7.92418e-06	0.00532622	3.69977	0.568266	0.721644	0.153377	3	137573683	F	II		IGR	opensea	IGR-opensea			TRUE
cg15691199	0.117823	0.73092	6.61198	7.94783e-06	0.0053336	3.69673	0.672009	0.789832	0.117823	14	23589419	R	II	CEBPE	TSS1500	opensea	TSS1500-opensea
cg10424581	0.144898	0.533565	6.5923	8.22353e-06	0.00544909	3.66198	0.461116	0.606014	0.144898	17	41186713	F	II		IGR	opensea	IGR-opensea			TRUE
cg04892836	0.152302	0.607734	6.59014	8.25449e-06	0.00545042	3.65815	0.531583	0.683886	0.152302	12	115174285	R	II		IGR	island	IGR-island	chr12:115173614-115174822
cg27508586	0.144231	0.661341	6.59002	8.25624e-06	0.00545042	3.65793	0.589226	0.733457	0.144231	15	51660650	R	II	GLDN	Body	opensea	Body-opensea			TRUE
cg21097788	-0.126699	0.566284	-6.58945	8.2644e-06	0.00545042	3.65693	0.629634	0.502934	-0.126699	14	93502930	F	II	ITPK1	Body	opensea	Body-opensea		TRUE	TRUE		rs4905039
cg23079866	0.145474	0.672315	6.58715	8.29738e-06	0.00546358	3.65287	0.599578	0.745052	0.145474	11	64936920	R	II	SPDYC	TSS1500	opensea	TSS1500-opensea			TRUE
cg18537677	0.182679	0.781386	6.57804	8.42975e-06	0.00550433	3.63674	0.690047	0.872726	0.182679	1	56720133	F	II		IGR	opensea	IGR-opensea					rs79685508
cg12562403	0.185898	0.459962	6.56396	8.6384e-06	0.00559508	3.61182	0.367012	0.552911	0.185898	12	3214145	R	II	TSPAN9	5'UTR	opensea	5'UTR-opensea		TRUE	TRUE
cg22760338	0.115235	0.770171	6.56368	8.64264e-06	0.00559508	3.61132	0.712554	0.827789	0.115235	5	35092023	R	II	PRLR	5'UTR	opensea	5'UTR-opensea			TRUE
cg24702826	0.145732	0.661075	6.55556	8.76556e-06	0.00562065	3.59693	0.588209	0.733941	0.145732	6	86171768	F	II	NT5E	Body	opensea	Body-opensea			TRUE
cg16510654	0.100895	0.620098	6.54317	8.95671e-06	0.00564094	3.57495	0.569651	0.670545	0.100895	1	16330625	R	II	C1orf64	TSS200	opensea	TSS200-opensea
cg07549297	0.131168	0.750555	6.53812	9.0359e-06	0.00564094	3.56598	0.684971	0.816139	0.131168	8	103952396	R	II		IGR	opensea	IGR-opensea			TRUE
cg04310104	0.146665	0.504911	6.5239	9.26258e-06	0.00564339	3.54073	0.431578	0.578244	0.146665	6	50785757	R	II	TFAP2B	TSS1500	shore	TSS1500-shore	chr6:50787286-50788091
cg08001668	0.116726	0.672977	6.52217	9.29055e-06	0.00564339	3.53765	0.614614	0.73134	0.116726	11	92670490	F	II		IGR	opensea	IGR-opensea
cg22190361	0.123457	0.654872	6.52195	9.29425e-06	0.00564339	3.53725	0.593144	0.716601	0.123457	2	174886880	R	II		IGR	shelf	IGR-shelf	chr2:174890243-174890814
cg05173058	-0.125356	0.360248	-6.52107	9.30844e-06	0.00564339	3.53569	0.422926	0.29757	-0.125356	15	93573245	R	I		IGR	opensea	IGR-opensea			TRUE
cg15618758	0.105158	0.832476	6.51964	9.33178e-06	0.00564339	3.53314	0.779896	0.885055	0.105158	6	157168834	F	II	ARID1B	Body	opensea	Body-opensea			TRUE
cg00069642	0.114065	0.615452	6.51945	9.33489e-06	0.00564339	3.5328	0.55842	0.672484	0.114065	5	141062490	R	II	ARAP3	TSS1500	opensea	TSS1500-opensea
cg19084893	0.133368	0.495625	6.51688	9.37674e-06	0.00564436	3.52824	0.428941	0.562309	0.133368	1	31688959	R	II		IGR	opensea	IGR-opensea			TRUE
cg01066588	0.130615	0.779344	6.51192	9.45826e-06	0.00568222	3.51942	0.714037	0.844652	0.130615	16	84655553	F	II		IGR	shelf	IGR-shelf	chr16:84650960-84651565				rs79071495
cg14349078	0.109812	0.707801	6.5106	9.48016e-06	0.00568222	3.51707	0.652895	0.762707	0.109812	9	78547359	F	II	PCSK5	Body	opensea	Body-opensea			TRUE
cg17186750	0.113757	0.757693	6.50787	9.52536e-06	0.00569604	3.51222	0.700815	0.814572	0.113757	8	38529336	F	II		IGR	opensea	IGR-opensea			TRUE
cg01518131	0.100504	0.861251	6.50558	9.5637e-06	0.00569604	3.50813	0.810999	0.911503	0.100504	10	47010888	R	II		IGR	shelf	IGR-shelf	chr10:47008084-47008410					rs9730723
cg20945738	-0.104797	0.188927	-6.4891	9.84313e-06	0.00581023	3.47878	0.241325	0.136529	-0.104797	13	108922032	F	II	TNFSF13B	5'UTR	opensea	5'UTR-opensea			TRUE	low-CpG:107720015-107720565
cg17038235	0.130323	0.714092	6.48859	9.85181e-06	0.00581023	3.47788	0.648931	0.779254	0.130323	5	172370524	F	II	ERGIC1	Body	opensea	Body-opensea		TRUE	TRUE
cg21283680	0.145957	0.664131	6.46325	1.02988e-05	0.00595242	3.43267	0.591153	0.73711	0.145957	3	15384005	F	II	SH3BP5	TSS1500	opensea	TSS1500-opensea					rs74716230
cg17534540	0.117305	0.347501	6.46144	1.03316e-05	0.0059632	3.42942	0.288848	0.406153	0.117305	3	129024712	R	I		IGR	opensea	IGR-opensea		TRUE
cg10757024	0.187069	0.51868	6.45853	1.03843e-05	0.00597137	3.42424	0.425145	0.612214	0.187069	14	55105357	F	II	SAMD4A	Body	opensea	Body-opensea			TRUE		rs75233955
cg03662398	0.216653	0.639082	6.45167	1.051e-05	0.0059744	3.41197	0.530756	0.747409	0.216653	17	53412828	F	II		IGR	opensea	IGR-opensea			TRUE
cg25202370	0.17826	0.462839	6.43619	1.07995e-05	0.00603826	3.38429	0.373709	0.551969	0.17826	1	42129921	F	II	HIVEP3	5'UTR	shore	5'UTR-shore	chr1:42127380-42128632		TRUE
cg07671644	-0.165973	0.197765	-6.43284	1.08634e-05	0.00603826	3.37828	0.280751	0.114779	-0.165973	2	37545668	F	II	PRKD3	TSS1500	opensea	TSS1500-opensea			TRUE
cg11245569	0.151243	0.495365	6.43242	1.08713e-05	0.00603826	3.37754	0.419743	0.570986	0.151243	11	8679885	F	I	TRIM66	5'UTR	opensea	5'UTR-opensea			TRUE
cg23623851	0.121477	0.652766	6.42904	1.0936e-05	0.00604665	3.37148	0.592028	0.713505	0.121477	3	148992037	R	II		IGR	opensea	IGR-opensea			TRUE
cg23985209	0.102312	0.709579	6.42359	1.10413e-05	0.00609187	3.36173	0.658423	0.760735	0.102312	6	15066115	R	II		IGR	opensea	IGR-opensea			TRUE		rs77055165
cg07058109	-0.110979	0.281736	-6.42331	1.10468e-05	0.00609187	3.36122	0.337226	0.226247	-0.110979	17	40264861	R	II	DHX58	TSS200	opensea	TSS200-opensea		TRUE	TRUE
cg02922577	-0.101394	0.860404	-6.42054	1.11007e-05	0.00609636	3.35626	0.911101	0.809707	-0.101394	1	91488624	R	II	ZNF644	TSS1500	shore	TSS1500-shore	chr1:91487158-91487807
cg22147898	-0.110223	0.709735	-6.41996	1.1112e-05	0.00609636	3.35522	0.764846	0.654623	-0.110223	8	144824078	F	II		IGR	shore	IGR-shore	chr8:144822011-144822805
cg17569842	0.137441	0.65943	6.40941	1.13202e-05	0.0061619	3.3363	0.59071	0.728151	0.137441	4	3371566	R	II	RGS12	Body	shelf	Body-shelf	chr4:3374733-3374998	TRUE	TRUE
cg18493761	0.12435	0.34814	6.40413	1.14259e-05	0.00619753	3.32683	0.285965	0.410315	0.12435	11	125386885	R	II		IGR	opensea	IGR-opensea			TRUE
cg02810692	0.10715	0.772377	6.40176	1.14737e-05	0.00619753	3.32258	0.718802	0.825952	0.10715	3	54962954	R	II	LRTM1	TSS1500	opensea	TSS1500-opensea
cg12155547	-0.137211	0.233134	-6.40168	1.14752e-05	0.00619753	3.32244	0.30174	0.164529	-0.137211	11	65194965	R	II		IGR	shelf	IGR-shelf	chr11:65190824-65191058			low-CpG:64951457-64951665
cg19404444	0.120158	0.478962	6.39904	1.15288e-05	0.00619753	3.31769	0.418883	0.539041	0.120158	1	2164602	R	II	SKI	Body	shelf	Body-shelf	chr1:2158212-2161173		TRUE
cg06951627	0.186656	0.357321	6.39902	1.15291e-05	0.00619753	3.31767	0.263993	0.450649	0.186656	6	26196580	R	II		IGR	shore	IGR-shore	chr6:26197070-26197537
cg09151131	0.135705	0.762326	6.38201	1.188e-05	0.00631948	3.28711	0.694473	0.830178	0.135705	17	48552276	F	II		IGR	shelf	IGR-shelf	chr17:48556004-48556509
cg16990557	0.115199	0.291179	6.37601	1.20065e-05	0.00634748	3.27632	0.23358	0.348779	0.115199	6	17725431	F	II		IGR	opensea	IGR-opensea		TRUE	TRUE
cg13543254	0.10118	0.737548	6.3732	1.20662e-05	0.00634748	3.27127	0.686958	0.788138	0.10118	15	33131642	R	II	FMN1	Body	opensea	Body-opensea			TRUE
cg16172408	0.248046	0.284671	6.37316	1.20669e-05	0.00634748	3.27121	0.160648	0.408694	0.248046	7	88388622	F	II	ZNF804B	TSS200	island	TSS200-island	chr7:88388488-88389283
cg18115244	0.193468	0.465301	6.37247	1.20817e-05	0.00634748	3.26996	0.368567	0.562035	0.193468	2	55315271	R	II		IGR	opensea	IGR-opensea			TRUE
cg04492086	0.180054	0.615235	6.37089	1.21154e-05	0.00634748	3.26713	0.525208	0.705262	0.180054	1	8173451	F	II		IGR	opensea	IGR-opensea
cg17232357	-0.124487	0.424926	-6.35578	1.24431e-05	0.00643201	3.23993	0.48717	0.362682	-0.124487	15	67012832	R	II	SMAD6	Body	opensea	Body-opensea		TRUE	TRUE			rs75765310
cg24826020	0.151393	0.407038	6.35405	1.24812e-05	0.00644376	3.23681	0.331342	0.482735	0.151393	4	38070998	F	II	TBC1D1	Body	opensea	Body-opensea		TRUE	TRUE
cg07426848	0.118724	0.645325	6.34732	1.26307e-05	0.00646558	3.22468	0.585963	0.704687	0.118724	1	153521712	R	II	S100A3	5'UTR	opensea	5'UTR-opensea		TRUE
cg23699648	0.143546	0.395542	6.34428	1.26987e-05	0.00646558	3.2192	0.323769	0.467315	0.143546	6	121756560	R	II	GJA1	TSS200	opensea	TSS200-opensea
cg08130265	0.118159	0.540112	6.34352	1.27159e-05	0.00646558	3.21783	0.481033	0.599191	0.118159	15	77519170	R	II	C15orf5	TSS1500	opensea	TSS1500-opensea
cg25533211	0.116361	0.668272	6.33818	1.28366e-05	0.00648153	3.2082	0.610092	0.726453	0.116361	6	41010111	F	II	TSPO2	TSS1500	opensea	TSS1500-opensea
cg24640577	0.111351	0.79782	6.33753	1.28513e-05	0.00648153	3.20704	0.742144	0.853496	0.111351	1	246939216	R	I		IGR	opensea	IGR-opensea
cg07957995	-0.128723	0.328459	-6.33521	1.29042e-05	0.00649478	3.20285	0.392821	0.264098	-0.128723	1	224644750	F	II		IGR	opensea	IGR-opensea			TRUE
cg22891595	0.128456	0.68776	6.33436	1.29236e-05	0.00649676	3.20132	0.623533	0.751988	0.128456	3	193570256	R	II		IGR	opensea	IGR-opensea			TRUE
cg15381313	0.180222	0.4417	6.32794	1.30715e-05	0.00653985	3.18973	0.351589	0.531811	0.180222	12	100867509	R	II	NR1H4	TSS200	opensea	TSS200-opensea			TRUE
cg04165508	-0.171977	0.602046	-6.32434	1.3155e-05	0.00655488	3.18324	0.688035	0.516057	-0.171977	1	94167631	F	II		IGR	opensea	IGR-opensea		TRUE	TRUE		rs1891139
cg16326402	0.120428	0.744758	6.32059	1.32428e-05	0.00655488	3.17646	0.684544	0.804972	0.120428	2	158698856	R	II	ACVR1	5'UTR	opensea	5'UTR-opensea			TRUE
cg20495009	0.136365	0.558508	6.31594	1.33523e-05	0.00655488	3.16807	0.490325	0.62669	0.136365	12	105323744	F	II	SLC41A2	TSS1500	opensea	TSS1500-opensea
cg13912573	0.11286	0.703533	6.31535	1.33663e-05	0.00655488	3.167	0.647103	0.759963	0.11286	9	92293297	F	II	LOC100129066	Body	shore	Body-shore	chr9:92291268-92291524	TRUE	TRUE
cg26322711	0.163007	0.568346	6.30723	1.35601e-05	0.0065733	3.15233	0.486842	0.649849	0.163007	10	105846908	R	II	COL17A1	TSS1500	opensea	TSS1500-opensea
cg00502597	0.173324	0.574763	6.30337	1.36534e-05	0.00658814	3.14535	0.488101	0.661424	0.173324	1	60197222	F	II	FGGY	Body	opensea	Body-opensea			TRUE
cg23613162	0.109513	0.732751	6.29196	1.39328e-05	0.00661718	3.1247	0.677994	0.787507	0.109513	1	27891416	F	II	AHDC1	5'UTR	shelf	5'UTR-shelf	chr1:27894927-27895524		TRUE
cg26112871	-0.19213	0.375714	-6.29071	1.39637e-05	0.00661718	3.12245	0.471779	0.279649	-0.19213	5	171320720	F	II	FBXW11	Body	opensea	Body-opensea			TRUE
cg00484122	0.120314	0.293785	6.28922	1.40007e-05	0.00661718	3.11975	0.233628	0.353942	0.120314	2	20579065	R	II		IGR	opensea	IGR-opensea		TRUE	TRUE
cg00198729	0.108819	0.848297	6.28484	1.41102e-05	0.00661718	3.11181	0.793887	0.902706	0.108819	17	42020748	R	II	PPY	TSS1500	opensea	TSS1500-opensea
cg03202732	0.105943	0.727036	6.28366	1.41399e-05	0.00661718	3.10967	0.674064	0.780007	0.105943	11	63655087	R	II	MARK2	TSS1500	opensea	TSS1500-opensea
cg02054252	0.148174	0.712983	6.28012	1.42291e-05	0.00663023	3.10327	0.638896	0.787069	0.148174	12	50078554	F	II	FMNL3	Body	opensea	Body-opensea			TRUE		rs11169106
cg24411312	0.117015	0.788274	6.26532	1.46085e-05	0.00673986	3.07645	0.729766	0.846781	0.117015	11	130028844	F	II	ST14	TSS1500	shore	TSS1500-shore	chr11:130029658-130030262
cg05232241	0.145989	0.71874	6.25903	1.47731e-05	0.0067699	3.06504	0.645746	0.791734	0.145989	7	11468680	F	II	THSD7A	Body	opensea	Body-opensea			TRUE
cg18315125	0.106945	0.768515	6.2577	1.48081e-05	0.0067699	3.06262	0.715042	0.821987	0.106945	11	129514402	R	II		IGR	opensea	IGR-opensea			TRUE
cg26033466	0.102607	0.319626	6.25119	1.49807e-05	0.0067699	3.05082	0.268323	0.37093	0.102607	7	96644782	F	II	DLX6AS	TSS1500	shore	TSS1500-shore	chr7:96645786-96646599
cg12593793	-0.139984	0.138847	-6.24972	1.50202e-05	0.0067699	3.04814	0.208839	0.0688551	-0.139984	1	156074135	F	II		IGR	opensea	IGR-opensea		TRUE	TRUE
cg06215984	0.133478	0.40726	6.24706	1.50914e-05	0.0067841	3.04332	0.340521	0.473999	0.133478	1	203258903	F	II		IGR	opensea	IGR-opensea
cg01692757	0.119891	0.844461	6.24357	1.51858e-05	0.00680473	3.03696	0.784515	0.904406	0.119891	16	54211537	R	II		IGR	opensea	IGR-opensea
cg09842053	0.108784	0.838246	6.23671	1.53725e-05	0.006832	3.02451	0.783854	0.892638	0.108784	2	31637849	R	II	XDH	TSS1500	opensea	TSS1500-opensea
cg19457763	0.152108	0.246306	6.23469	1.54279e-05	0.006832	3.02084	0.170252	0.32236	0.152108	11	123066693	F	II	ASAM	TSS1500	island	TSS1500-island	chr11:123066517-123066986	TRUE			rs76768790
cg06759993	0.13454	0.345675	6.23386	1.54509e-05	0.006832	3.01933	0.278405	0.412945	0.13454	6	144065203	R	II	PHACTR2	Body	opensea	Body-opensea			TRUE
cg09173378	0.131444	0.650822	6.23243	1.54905e-05	0.006832	3.01672	0.5851	0.716544	0.131444	1	196370245	R	II	KCNT2	Body	opensea	Body-opensea			TRUE
cg02538248	0.170179	0.623963	6.2286	1.55967e-05	0.006832	3.00976	0.538873	0.709052	0.170179	16	75045643	R	II	ZNRF1	Body	opensea	Body-opensea			TRUE
cg10755723	0.105093	0.557163	6.22428	1.57174e-05	0.006832	3.00191	0.504616	0.609709	0.105093	3	192576964	R	II	C3orf59	Body	opensea	Body-opensea			TRUE
cg15936999	-0.126423	0.130488	-6.22197	1.57823e-05	0.006832	2.99771	0.1937	0.0672767	-0.126423	17	73840853	R	I	UNC13D	TSS200	opensea	TSS200-opensea			TRUE
cg26649851	0.135824	0.695991	6.22158	1.57934e-05	0.006832	2.99699	0.628079	0.763903	0.135824	7	41611383	F	II		IGR	opensea	IGR-opensea			TRUE
cg18316735	0.125868	0.821859	6.21756	1.59071e-05	0.00686479	2.98968	0.758925	0.884793	0.125868	1	204339486	R	II	LOC127841	TSS1500	opensea	TSS1500-opensea
cg08792995	0.138613	0.522186	6.21415	1.60043e-05	0.0068957	2.98347	0.452879	0.591492	0.138613	6	108145658	R	II	SCML4	TSS200	opensea	TSS200-opensea
cg13908074	0.173998	0.305813	6.21199	1.60662e-05	0.0068957	2.97955	0.218814	0.392812	0.173998	2	149259371	F	II	MBD5	Body	opensea	Body-opensea			TRUE
cg05648614	-0.128113	0.598277	-6.20675	1.62176e-05	0.00691366	2.96999	0.662333	0.53422	-0.128113	3	5180520	F	II	ARL8B	Body	opensea	Body-opensea			TRUE
cg07192048	0.143216	0.589043	6.19962	1.64256e-05	0.00693905	2.95701	0.517435	0.660651	0.143216	11	70560211	R	II	SHANK2	Body	shelf	Body-shelf	chr11:70563664-70563886		TRUE
cg20116800	0.120398	0.722268	6.19754	1.64867e-05	0.00694266	2.95322	0.662069	0.782467	0.120398	17	74258224	R	II		IGR	shelf	IGR-shelf	chr17:74261127-74262282
cg14692920	-0.220146	0.691377	-6.19465	1.65723e-05	0.00696276	2.94795	0.80145	0.581304	-0.220146	2	204316100	F	II	RAPH1	Body	opensea	Body-opensea			TRUE
cg26008369	0.157886	0.55339	6.18943	1.67278e-05	0.00699651	2.93843	0.474447	0.632333	0.157886	1	145017064	F	II	PDE4DIP	Body	opensea	Body-opensea			TRUE
cg10592171	0.120392	0.692725	6.1867	1.68097e-05	0.0070005	2.93346	0.632529	0.752921	0.120392	17	48044465	R	II		IGR	shore	IGR-shore	chr17:48045788-48047207
cg09668344	0.107043	0.419615	6.18606	1.68291e-05	0.0070005	2.93228	0.366093	0.473136	0.107043	11	77122506	F	II	PAK1	5'UTR	shore	5'UTR-shore	chr11:77122736-77123088	TRUE
cg24995503	-0.139258	0.339547	-6.18338	1.69101e-05	0.00701002	2.92739	0.409176	0.269918	-0.139258	14	103046300	F	II		IGR	opensea	IGR-opensea		TRUE	TRUE		rs13329052
cg22596016	0.126401	0.688925	6.17618	1.71297e-05	0.00703854	2.91424	0.625725	0.752126	0.126401	17	61711557	R	II	MAP3K3	Body	opensea	Body-opensea			TRUE
cg20625523	0.156698	0.599222	6.17559	1.71478e-05	0.00703854	2.91317	0.520873	0.677571	0.156698	2	64893849	R	II		IGR	opensea	IGR-opensea			TRUE
cg13899132	0.146932	0.707666	6.17473	1.71743e-05	0.00703854	2.9116	0.6342	0.781132	0.146932	7	124289177	R	II		IGR	opensea	IGR-opensea			TRUE
cg23475018	0.201404	0.45752	6.17409	1.71939e-05	0.00703854	2.91043	0.356818	0.558222	0.201404	3	124277638	R	II	KALRN	Body	opensea	Body-opensea			TRUE
cg26736154	0.131409	0.771681	6.17222	1.72516e-05	0.00704622	2.90702	0.705977	0.837385	0.131409	15	37020592	R	II	C15orf41	Body	opensea	Body-opensea			TRUE
cg00833639	0.192481	0.5086	6.17124	1.72821e-05	0.00704622	2.90522	0.412359	0.60484	0.192481	7	40873953	F	II	C7orf10	Body	opensea	Body-opensea			TRUE
cg02107824	0.102489	0.566671	6.16927	1.7343e-05	0.00706422	2.90163	0.515426	0.617915	0.102489	10	115997879	F	II	VWA2	TSS1500	shore	TSS1500-shore	chr10:115999008-115999603
cg08082862	0.107423	0.638634	6.16846	1.73684e-05	0.00706715	2.90014	0.584922	0.692346	0.107423	16	67807580	F	II	RANBP10	Body	opensea	Body-opensea			TRUE
cg26876834	0.372409	0.438789	6.16622	1.74383e-05	0.00706715	2.89605	0.252584	0.624993	0.372409	16	2013573	F	I	SNHG9	TSS1500	shore	TSS1500-shore	chr16:2014164-2015451				rs72764891
cg02973057	0.206074	0.663516	6.16503	1.74754e-05	0.00707023	2.89389	0.560479	0.766553	0.206074	22	31494860	R	I	SMTN	Body	island	Body-island	chr22:31494658-31495175	TRUE	TRUE
cg03109921	-0.15062	0.362544	-6.16444	1.74941e-05	0.00707098	2.8928	0.437854	0.287234	-0.15062	17	40820189	R	II	PLEKHH3	Body	shore	Body-shore	chr17:40821935-40823573	TRUE	TRUE
cg26460678	0.105639	0.534264	6.15487	1.77969e-05	0.00713854	2.87531	0.481444	0.587083	0.105639	3	50360667	F	I	HYAL2	TSS1500	shore	TSS1500-shore	chr3:50358378-50359606
cg05569877	0.125294	0.197913	6.15013	1.79492e-05	0.00717518	2.86664	0.135266	0.26056	0.125294	16	22203612	R	II		IGR	shore	IGR-shore	chr16:22201388-22202791
cg12649038	0.133604	0.507338	6.14694	1.80522e-05	0.00717986	2.86081	0.440536	0.57414	0.133604	10	116282534	R	II	ABLIM1	Body	opensea	Body-opensea			TRUE
cg05404865	0.138333	0.721528	6.14637	1.80706e-05	0.00717986	2.85977	0.652362	0.790694	0.138333	15	51683249	R	II	GLDN	Body	opensea	Body-opensea			TRUE
cg10974980	0.107191	0.339172	6.13747	1.83619e-05	0.00725452	2.84347	0.285576	0.392767	0.107191	15	74243781	R	II	LOXL1	Body	opensea	Body-opensea			TRUE
cg04544382	0.121529	0.876801	6.12933	1.86326e-05	0.00730672	2.82857	0.816037	0.937566	0.121529	7	29597279	F	II		IGR	opensea	IGR-opensea			TRUE
cg22207139	0.102074	0.287735	6.12606	1.87428e-05	0.00730672	2.82256	0.236698	0.338772	0.102074	15	59467736	F	II	MYO1E	Body	opensea	Body-opensea			TRUE
cg25503169	0.105182	0.764234	6.12582	1.87509e-05	0.00730672	2.82212	0.711643	0.816825	0.105182	4	26240502	F	II		IGR	opensea	IGR-opensea			TRUE		rs13126631
cg19407453	0.114202	0.412145	6.12548	1.87621e-05	0.00730672	2.82151	0.355044	0.469246	0.114202	10	73473423	F	II	C10orf105	3'UTR	opensea	3'UTR-opensea		TRUE	TRUE		rs41307565
cg15893204	0.118109	0.837406	6.12417	1.88064e-05	0.00731338	2.81911	0.778352	0.896461	0.118109	1	56247952	R	II		IGR	opensea	IGR-opensea			TRUE
cg14663177	0.121705	0.269501	6.11788	1.90206e-05	0.00733663	2.80757	0.208648	0.330354	0.121705	2	38373737	R	II	C2orf58	Body	opensea	Body-opensea		TRUE	TRUE
cg20456954	-0.177858	0.750325	-6.11247	1.92067e-05	0.00737365	2.79765	0.839253	0.661396	-0.177858	8	68178729	R	II	ARFGEF1	Body	opensea	Body-opensea			TRUE
cg12063688	0.140054	0.196943	6.10428	1.94923e-05	0.00740224	2.78262	0.126916	0.26697	0.140054	14	65173327	F	II	PLEKHG3	5'UTR	shore	5'UTR-shore	chr14:65170876-65172007		TRUE
cg23903301	-0.185467	0.559901	-6.10296	1.95387e-05	0.00740651	2.78019	0.652635	0.467168	-0.185467	11	33744366	F	II	CD59	5'UTR	opensea	5'UTR-opensea			TRUE		rs61576899
cg03373714	0.136214	0.67952	6.09708	1.97468e-05	0.00741827	2.7694	0.611413	0.747627	0.136214	2	147632094	R	II		IGR	opensea	IGR-opensea
cg22384188	0.107758	0.475804	6.09633	1.97737e-05	0.00741827	2.76802	0.421925	0.529683	0.107758	1	44347398	R	II	ST3GAL3	Body	opensea	Body-opensea			TRUE
cg26366554	-0.206944	0.468149	-6.09497	1.98223e-05	0.00741827	2.76552	0.571622	0.364677	-0.206944	6	138610113	R	II	KIAA1244	Body	shelf	Body-shelf	chr6:138612989-138613218	TRUE			rs5880381	rs34965549
cg25310097	0.110719	0.767167	6.09484	1.98268e-05	0.00741827	2.76529	0.711808	0.822526	0.110719	4	86874205	R	II	ARHGAP24	Body	opensea	Body-opensea			TRUE
cg17749454	0.101439	0.540259	6.09168	1.994e-05	0.0074446	2.75949	0.48954	0.590978	0.101439	17	73101934	R	II	SLC16A5	Body	shelf	Body-shelf	chr17:73105229-73106667	TRUE
cg19742470	0.126467	0.693426	6.08675	2.01182e-05	0.00748455	2.75043	0.630192	0.756659	0.126467	2	182850059	F	II	PPP1R1C	TSS1500	opensea	TSS1500-opensea
cg11241750	-0.120201	0.561432	-6.08597	2.01466e-05	0.00748725	2.74899	0.621532	0.501332	-0.120201	5	125694354	F	II	GRAMD3	TSS1500	opensea	TSS1500-opensea
cg09760618	-0.183376	0.492699	-6.08557	2.0161e-05	0.00748725	2.74826	0.584388	0.401011	-0.183376	2	233243204	F	II	ALPP	TSS200	shore	TSS200-shore	chr2:233244323-233244651
cg07801569	0.15576	0.274061	6.0836	2.0233e-05	0.00749412	2.74463	0.196181	0.351941	0.15576	6	31707151	R	II	MSH5	TSS1500	shore	TSS1500-shore	chr6:31707489-31708336
cg07026448	-0.100794	0.239484	-6.08154	2.03082e-05	0.0075041	2.74085	0.289881	0.189088	-0.100794	6	160680851	R	II	SLC22A2	TSS1500	shore	TSS1500-shore	chr6:160679377-160679701		TRUE
cg26035892	0.105143	0.667516	6.07276	2.06327e-05	0.00759537	2.7247	0.614945	0.720088	0.105143	2	174855415	F	II		IGR	opensea	IGR-opensea			TRUE
cg25942896	0.120238	0.765771	6.07177	2.06696e-05	0.007596	2.72288	0.705652	0.82589	0.120238	21	37756881	R	II	CHAF1B	TSS1500	shore	TSS1500-shore	chr21:37757496-37758113
cg17533563	0.192018	0.623387	6.0704	2.07211e-05	0.00760132	2.72035	0.527378	0.719395	0.192018	7	143154736	F	II		IGR	opensea	IGR-opensea			TRUE
cg21596498	0.185777	0.66797	6.06363	2.09761e-05	0.00765639	2.70789	0.575081	0.760859	0.185777	19	42618407	R	II	POU2F2	Body	opensea	Body-opensea		TRUE	TRUE
cg09417209	0.168764	0.460906	6.05997	2.11151e-05	0.00765904	2.70116	0.376524	0.545288	0.168764	16	11715746	F	II		IGR	opensea	IGR-opensea			TRUE		rs78821632
cg02300652	0.210076	0.686695	6.05247	2.14038e-05	0.00769492	2.68733	0.581658	0.791733	0.210076	2	152804107	R	II	CACNB4	Body	opensea	Body-opensea			TRUE
cg14282850	0.106887	0.629475	6.05174	2.1432e-05	0.00769492	2.68599	0.576031	0.682918	0.106887	10	123924917	F	II	TACC2	Body	shore	Body-shore	chr10:123922850-123923542		TRUE
cg26614229	-0.112149	0.112827	-6.0492	2.15307e-05	0.00769492	2.68131	0.168902	0.0567522	-0.112149	1	231156204	R	II	MIR1182	TSS1500	opensea	TSS1500-opensea			TRUE
cg00493363	0.152697	0.733182	6.04809	2.1574e-05	0.00769492	2.67926	0.656834	0.80953	0.152697	7	106619774	R	II		IGR	opensea	IGR-opensea			TRUE
cg00603110	0.167111	0.489485	6.04482	2.17021e-05	0.00770097	2.67323	0.40593	0.573041	0.167111	6	134395621	F	II		IGR	opensea	IGR-opensea			TRUE
cg09548638	-0.172344	0.571752	-6.03907	2.19292e-05	0.00775696	2.66263	0.657924	0.48558	-0.172344	5	148443744	F	II	SH3TC2	TSS1500	opensea	TSS1500-opensea
cg25948445	0.111287	0.56647	6.03884	2.19381e-05	0.00775696	2.66222	0.510826	0.622113	0.111287	5	154140801	R	II	LARP1	Body	shelf	Body-shelf	chr5:154134139-154137009		TRUE
cg02822958	0.171501	0.591583	6.03813	2.19664e-05	0.00776043	2.6609	0.505832	0.677333	0.171501	2	46747628	F	I	ATP6V1E2	TSS1500	opensea	TSS1500-opensea			TRUE		rs896209
cg08131184	0.100473	0.667541	6.03715	2.20057e-05	0.0077678	2.65908	0.617304	0.717777	0.100473	19	33764378	R	II		IGR	island	IGR-island	chr19:33764349-33764551	TRUE
cg21931263	0.12721	0.674846	6.03463	2.2106e-05	0.007779	2.65445	0.611241	0.738451	0.12721	5	67715050	R	II		IGR	opensea	IGR-opensea			TRUE
cg11470941	-0.137751	0.185164	-6.03412	2.21264e-05	0.007779	2.65351	0.254039	0.116288	-0.137751	4	174042502	R	II		IGR	opensea	IGR-opensea			TRUE
cg14307223	0.104528	0.576883	6.03324	2.21619e-05	0.00777956	2.65188	0.524619	0.629147	0.104528	2	128221129	R	II		IGR	opensea	IGR-opensea			TRUE
cg12747823	0.146235	0.54351	6.03274	2.21818e-05	0.00777956	2.65096	0.470392	0.616627	0.146235	2	238510665	R	II		IGR	opensea	IGR-opensea			TRUE
cg16644967	0.147863	0.481247	6.03262	2.21869e-05	0.00777956	2.65073	0.407316	0.555179	0.147863	16	86962747	F	II		IGR	shelf	IGR-shelf	chr16:86965271-86965496	TRUE
cg25221207	0.10429	0.711257	6.03137	2.2237e-05	0.00779064	2.64843	0.659112	0.763402	0.10429	11	119555633	R	II	PVRL1	Body	opensea	Body-opensea		TRUE	TRUE
cg08821811	0.133015	0.38556	6.03059	2.22685e-05	0.00779519	2.64699	0.319052	0.452067	0.133015	16	11391517	F	II		IGR	opensea	IGR-opensea		TRUE	TRUE
cg02042997	0.106183	0.766653	6.02928	2.23214e-05	0.00780073	2.64457	0.713562	0.819744	0.106183	16	28505886	R	II	APOB48R	TSS200	shelf	TSS200-shelf	chr16:28509237-28509509
cg17627898	0.118909	0.647684	6.02075	2.26694e-05	0.00786357	2.62882	0.58823	0.707139	0.118909	12	118782453	R	II	TAOK3	5'UTR	opensea	5'UTR-opensea			TRUE
cg26546373	0.106971	0.665855	6.01998	2.27011e-05	0.00786357	2.6274	0.612369	0.71934	0.106971	5	154095163	R	II	LARP1	Body	opensea	Body-opensea			TRUE
cg04767507	0.10157	0.660144	6.01939	2.27255e-05	0.00786357	2.6263	0.609359	0.710929	0.10157	10	80989841	F	II	ZMIZ1	Body	opensea	Body-opensea			TRUE		rs72818221	rs75519194
cg26297819	-0.107277	0.330419	-6.01148	2.30539e-05	0.00790685	2.61169	0.384057	0.276781	-0.107277	22	41763280	R	I	TEF	TSS200	opensea	TSS200-opensea			TRUE
cg20127859	-0.169329	0.524442	-6.00839	2.31833e-05	0.00791137	2.60599	0.609107	0.439777	-0.169329	8	144656271	F	II	C8orf73	TSS1500	shelf	TSS1500-shelf	chr8:144659745-144660635
cg00646216	-0.189282	0.481932	-6.00436	2.33537e-05	0.00792975	2.59853	0.576573	0.387291	-0.189282	16	73210822	F	II		IGR	opensea	IGR-opensea		TRUE
cg03998792	0.103849	0.599972	5.9948	2.37626e-05	0.00796389	2.58085	0.548048	0.651897	0.103849	11	120011770	F	II		IGR	shelf	IGR-shelf	chr11:120008046-120008710
cg19096475	0.143586	0.216801	5.99334	2.38257e-05	0.00796389	2.57815	0.145008	0.288594	0.143586	11	123066529	R	II	ASAM	TSS1500	island	TSS1500-island	chr11:123066517-123066986	TRUE
cg15752292	0.130986	0.484912	5.99303	2.38391e-05	0.00796389	2.57758	0.419419	0.550405	0.130986	19	39970821	R	II	TIMM50	TSS1500	shore	TSS1500-shore	chr19:39971346-39971718
cg08267148	0.109407	0.724745	5.99119	2.39193e-05	0.00796389	2.57416	0.670041	0.779448	0.109407	2	202023415	R	II	CFLAR	Body	opensea	Body-opensea		TRUE	TRUE
cg16019558	0.191911	0.356393	5.98781	2.40666e-05	0.00797981	2.5679	0.260437	0.452348	0.191911	6	110104633	R	II	FIG4	Body	opensea	Body-opensea			TRUE
cg02309230	0.112315	0.69393	5.9866	2.41195e-05	0.00798477	2.56567	0.637772	0.750088	0.112315	6	4612064	F	II		IGR	opensea	IGR-opensea			TRUE
cg01702055	-0.148979	0.494108	-5.98475	2.42008e-05	0.00798655	2.56224	0.568598	0.419619	-0.148979	6	13303065	F	II		IGR	opensea	IGR-opensea		TRUE	TRUE
cg12039595	0.136677	0.673624	5.98303	2.42769e-05	0.0079991	2.55905	0.605286	0.741963	0.136677	1	244480459	F	II		IGR	opensea	IGR-opensea			TRUE		rs60165190
cg16592897	0.118546	0.601485	5.97625	2.4578e-05	0.00805905	2.54649	0.542212	0.660758	0.118546	1	111023201	R	II	CYMP	TSS200	opensea	TSS200-opensea
cg11406453	0.12747	0.775946	5.97227	2.47567e-05	0.0080688	2.53911	0.712211	0.839681	0.12747	1	101602562	R	II		IGR	opensea	IGR-opensea			TRUE
cg22305268	0.160781	0.2323	5.96865	2.49203e-05	0.00809615	2.53241	0.15191	0.312691	0.160781	3	193857540	F	II		IGR	shore	IGR-shore	chr3:193858770-193859695
cg09494546	-0.139392	0.515151	-5.96806	2.49469e-05	0.00809615	2.53132	0.584847	0.445455	-0.139392	1	110933248	R	II	SLC16A4	5'UTR	opensea	5'UTR-opensea			TRUE
cg11996209	0.186716	0.679144	5.96733	2.49803e-05	0.00809615	2.52996	0.585786	0.772502	0.186716	7	29599895	R	I		IGR	shelf	IGR-shelf	chr7:29603109-29603328
cg21550107	0.128735	0.641382	5.96512	2.50808e-05	0.00811154	2.52587	0.577015	0.70575	0.128735	5	141846318	R	II		IGR	opensea	IGR-opensea			TRUE
cg11747022	-0.125318	0.751224	-5.96423	2.51216e-05	0.0081185	2.52421	0.813882	0.688565	-0.125318	19	2813926	R	II		IGR	shelf	IGR-shelf	chr19:2810141-2810762
cg13597317	0.112725	0.655465	5.96287	2.5184e-05	0.00812566	2.52169	0.599102	0.711827	0.112725	9	111033925	R	II		IGR	opensea	IGR-opensea			TRUE
cg15728320	0.117478	0.420609	5.96045	2.52951e-05	0.00812566	2.5172	0.36187	0.479348	0.117478	1	47658945	R	II		IGR	opensea	IGR-opensea		TRUE	TRUE
cg14097568	0.116692	0.190718	5.95997	2.53176e-05	0.00812566	2.5163	0.132372	0.249064	0.116692	1	94792942	F	II		IGR	opensea	IGR-opensea			TRUE
cg12623735	0.101818	0.812785	5.95857	2.53821e-05	0.00813767	2.51371	0.761877	0.863694	0.101818	5	146152748	F	II	PPP2R2B	Body	opensea	Body-opensea			TRUE
cg23088142	0.170028	0.495643	5.95818	2.54003e-05	0.00813767	2.51298	0.41063	0.580657	0.170028	3	137531265	R	II		IGR	opensea	IGR-opensea			TRUE
cg01521060	0.103131	0.628665	5.9579	2.5413e-05	0.00813767	2.51247	0.5771	0.680231	0.103131	11	75476921	R	I		IGR	shelf	IGR-shelf	chr11:75479462-75480172
cg23675809	0.165799	0.802438	5.95703	2.54534e-05	0.00814441	2.51085	0.719539	0.885338	0.165799	12	42678439	F	II		IGR	shelf	IGR-shelf	chr12:42680607-42680889					rs58990065
cg03162492	0.104554	0.681572	5.95434	2.55784e-05	0.00817199	2.50586	0.629295	0.733849	0.104554	3	134010471	F	II		IGR	opensea	IGR-opensea			TRUE
cg13968233	0.142185	0.818744	5.9467	2.59372e-05	0.00822417	2.49167	0.747651	0.889837	0.142185	1	197564458	R	II	DENND1B	Body	opensea	Body-opensea			TRUE
cg20876852	0.141377	0.522233	5.94393	2.60685e-05	0.00824715	2.48653	0.451544	0.592921	0.141377	7	130134488	F	II	MEST	5'UTR	shore	5'UTR-shore	chr7:130130739-130133111		TRUE
cg12226009	0.151497	0.688455	5.93645	2.64266e-05	0.00829371	2.47264	0.612707	0.764204	0.151497	10	91263650	F	II	SLC16A12	5'UTR	opensea	5'UTR-opensea			TRUE
cg12905592	0.275777	0.46202	5.93518	2.64881e-05	0.00830496	2.47027	0.324132	0.599909	0.275777	12	50091449	R	II	FMNL3	Body	opensea	Body-opensea			TRUE
cg16744996	0.12021	0.580193	5.93359	2.65648e-05	0.00831045	2.46733	0.520088	0.640298	0.12021	14	70168865	F	II	KIAA0247	Body	opensea	Body-opensea			TRUE
cg09265016	0.140388	0.655101	5.93124	2.66791e-05	0.00832827	2.46296	0.584907	0.725296	0.140388	12	115170515	R	II		IGR	shelf	IGR-shelf	chr12:115173614-115174822
cg14001914	0.11169	0.64905	5.93098	2.6692e-05	0.00832827	2.46246	0.593206	0.704895	0.11169	4	25865695	F	I	SEL1L3	TSS1500	shore	TSS1500-shore	chr4:25863760-25864845
cg14361001	0.115554	0.741528	5.92184	2.71411e-05	0.00841552	2.44548	0.683751	0.799305	0.115554	9	83989198	F	II		IGR	opensea	IGR-opensea			TRUE
cg20678353	0.104255	0.620898	5.92082	2.7192e-05	0.00841552	2.44357	0.568771	0.673026	0.104255	15	38988560	R	II	C15orf53	TSS1500	opensea	TSS1500-opensea
cg03017653	0.115044	0.535069	5.92018	2.72237e-05	0.00841552	2.44238	0.477547	0.592591	0.115044	1	231115871	R	II	TTC13	TSS1500	shore	TSS1500-shore	chr1:231113871-231114873
cg01034993	0.103125	0.569581	5.91973	2.72461e-05	0.00841552	2.44154	0.518018	0.621144	0.103125	15	68992751	R	II	CORO2B	Body	opensea	Body-opensea		TRUE	TRUE
cg13165758	0.110289	0.132886	5.91916	2.72747e-05	0.00841552	2.44048	0.0777415	0.188031	0.110289	11	78061467	R	II	GAB2	Body	opensea	Body-opensea			TRUE
cg07129392	0.100321	0.722054	5.91903	2.72807e-05	0.00841552	2.44025	0.671894	0.772215	0.100321	5	167729645	F	II	WWC1	Body	opensea	Body-opensea			TRUE
cg22150335	0.102827	0.808921	5.91793	2.73359e-05	0.00842638	2.43819	0.757508	0.860335	0.102827	10	62148959	R	II	ANK3	Body	opensea	Body-opensea			TRUE
cg26271876	0.136107	0.806097	5.91679	2.73929e-05	0.00842796	2.43607	0.738043	0.87415	0.136107	2	54754922	R	II	RPL23AP32	TSS1500	opensea	TSS1500-opensea
cg02958515	0.149982	0.555426	5.91527	2.74688e-05	0.00843644	2.43325	0.480435	0.630416	0.149982	15	39650295	F	II		IGR	opensea	IGR-opensea			TRUE
cg00258633	0.179475	0.738098	5.91161	2.76534e-05	0.00846223	2.42644	0.64836	0.827835	0.179475	4	86745824	R	II	ARHGAP24	Body	opensea	Body-opensea			TRUE
cg19184885	-0.171837	0.501526	-5.90345	2.80691e-05	0.00851255	2.41124	0.587445	0.415608	-0.171837	17	45699322	R	II	NPEPPS	3'UTR	opensea	3'UTR-opensea		TRUE	TRUE
cg24794669	0.106693	0.832135	5.90074	2.82085e-05	0.00851649	2.4062	0.778789	0.885481	0.106693	10	134321589	R	II		IGR	shore	IGR-shore	chr10:134319304-134320146
cg17955761	0.141526	0.585613	5.90052	2.82203e-05	0.00851649	2.40577	0.514851	0.656376	0.141526	8	11628430	R	II	NEIL2	5'UTR	shore	5'UTR-shore	chr8:11627091-11627668		TRUE
cg02329140	-0.143507	0.492959	-5.89929	2.8284e-05	0.00851649	2.40348	0.564713	0.421206	-0.143507	1	232668750	R	II		IGR	opensea	IGR-opensea			TRUE
cg15527674	0.11925	0.563092	5.89713	2.83958e-05	0.00852538	2.39946	0.503467	0.622717	0.11925	11	61248474	R	I	C11orf66	TSS200	opensea	TSS200-opensea		TRUE
cg11190278	0.1664	0.478637	5.89318	2.86016e-05	0.00852538	2.39211	0.395437	0.561837	0.1664	14	51252662	R	II	NIN	Body	opensea	Body-opensea			TRUE
cg10929758	-0.157538	0.629878	-5.89135	2.86978e-05	0.00852851	2.38869	0.708647	0.551109	-0.157538	2	54857270	R	II	SPTBN1	Body	shore	Body-shore	chr2:54856098-54856487	TRUE
cg11691454	0.112744	0.854237	5.88956	2.87922e-05	0.00853202	2.38534	0.797865	0.910609	0.112744	7	41968248	R	II		IGR	opensea	IGR-opensea			TRUE
cg23032427	0.103252	0.66578	5.88916	2.8813e-05	0.00853202	2.38461	0.614154	0.717405	0.103252	15	76635953	R	II		IGR	shore	IGR-shore	chr15:76632262-76635515
cg23096144	0.101365	0.702619	5.88865	2.88402e-05	0.00853202	2.38365	0.651937	0.753301	0.101365	1	226012954	F	II	EPHX1	TSS200	opensea	TSS200-opensea
cg12819431	0.119437	0.676897	5.88837	2.88547e-05	0.00853202	2.38314	0.617179	0.736616	0.119437	3	193990908	F	II		IGR	shelf	IGR-shelf	chr3:193987425-193987758	TRUE				rs75892117
cg11526198	-0.139717	0.161573	-5.88403	2.90851e-05	0.00854608	2.37504	0.231432	0.0917149	-0.139717	1	23854847	F	II	E2F2	Body	shelf	Body-shelf	chr1:23857033-23858089	TRUE			rs76411021
cg23665230	0.167584	0.744434	5.88094	2.92504e-05	0.0085588	2.36927	0.660642	0.828226	0.167584	10	62495797	R	II		IGR	shelf	IGR-shelf	chr10:62492785-62493376
cg19051238	0.110372	0.697673	5.8793	2.93385e-05	0.00856669	2.36621	0.642487	0.752859	0.110372	12	70326318	F	II		IGR	opensea	IGR-opensea			TRUE
cg11166167	0.103481	0.542236	5.87298	2.96802e-05	0.0085831	2.35442	0.490496	0.593977	0.103481	1	8292578	R	II		IGR	opensea	IGR-opensea
cg01208614	-0.125495	0.318746	-5.86923	2.98852e-05	0.0085915	2.34741	0.381494	0.255998	-0.125495	5	141031443	R	I	FCHSD1	TSS1500	shore	TSS1500-shore	chr5:141030918-141031177
cg21410293	0.121531	0.789744	5.86871	2.99135e-05	0.0085915	2.34645	0.728978	0.850509	0.121531	18	46386361	F	I	KIAA0427	3'UTR	island	3'UTR-island	chr18:46386266-46386481		TRUE
cg02575483	-0.120705	0.402282	-5.8682	2.99418e-05	0.00859377	2.34548	0.462634	0.34193	-0.120705	6	117826706	F	II	DCBLD1	Body	opensea	Body-opensea			TRUE		rs9285420
cg27026192	0.13732	0.60894	5.86767	2.9971e-05	0.0085963	2.34449	0.540279	0.6776	0.13732	16	57836960	F	II	KIFC3	TSS1500	island	TSS1500-island	chr16:57835955-57836989	TRUE
cg16586880	0.153727	0.781534	5.86682	3.00177e-05	0.00859948	2.34291	0.704671	0.858397	0.153727	8	140854244	F	II	TRAPPC9	Body	opensea	Body-opensea			TRUE
cg23838231	0.146649	0.74631	5.85984	3.04046e-05	0.00865775	2.32987	0.672986	0.819634	0.146649	2	38306612	F	II		IGR	shelf	IGR-shelf	chr2:38301276-38304518
cg24058805	0.13266	0.745514	5.85656	3.05881e-05	0.00866762	2.32374	0.679184	0.811844	0.13266	1	66777579	R	I	PDE4B	Body	opensea	Body-opensea			TRUE
cg27278500	0.10496	0.680382	5.85599	3.06203e-05	0.00866992	2.32267	0.627902	0.732862	0.10496	2	96765415	F	II		IGR	opensea	IGR-opensea			TRUE
cg09232358	0.103472	0.659869	5.85358	3.07558e-05	0.00867561	2.31817	0.608133	0.711605	0.103472	14	23015657	F	II		IGR	opensea	IGR-opensea		TRUE	TRUE
cg14902267	0.134847	0.545475	5.85354	3.07585e-05	0.00867561	2.31809	0.478052	0.612898	0.134847	22	23923610	R	II	IGLL1	TSS1500	opensea	TSS1500-opensea
cg25707676	0.141974	0.454825	5.8527	3.08056e-05	0.00867561	2.31653	0.383838	0.525812	0.141974	7	96643539	R	II	DLX6AS	TSS200	shelf	TSS200-shelf	chr7:96645786-96646599
cg03656167	0.110628	0.7713	5.85009	3.09537e-05	0.00867661	2.31164	0.715986	0.826614	0.110628	3	159327290	F	II	SCHIP1	Body	opensea	Body-opensea			TRUE
cg11818544	0.103982	0.692593	5.84895	3.10188e-05	0.0086837	2.30951	0.640602	0.744584	0.103982	5	56972268	R	II		IGR	opensea	IGR-opensea			TRUE
cg13596208	-0.125928	0.133765	-5.84626	3.11723e-05	0.00869032	2.30448	0.196729	0.0708012	-0.125928	9	35603605	F	II		IGR	shore	IGR-shore	chr9:35603968-35605991
cg06327732	0.102513	0.674059	5.84564	3.12076e-05	0.00869032	2.30333	0.622803	0.725316	0.102513	3	121795811	F	II	CD86	TSS1500	opensea	TSS1500-opensea
cg10913077	0.108062	0.531484	5.84248	3.13896e-05	0.00870488	2.29741	0.477453	0.585515	0.108062	3	57080664	R	II	ARHGEF3	5'UTR	opensea	5'UTR-opensea			TRUE
cg01171670	0.103308	0.69045	5.83322	3.19284e-05	0.00880363	2.28008	0.638796	0.742104	0.103308	11	71083308	F	II		IGR	opensea	IGR-opensea			TRUE
cg00883689	-0.176816	0.548337	-5.82851	3.22062e-05	0.00884545	2.27126	0.636745	0.459929	-0.176816	2	54802904	F	II	SPTBN1	Body	opensea	Body-opensea			TRUE
cg04592706	0.17275	0.776497	5.82689	3.23025e-05	0.00884834	2.26822	0.690122	0.862873	0.17275	1	94586592	F	II	ABCA4	1stExon	opensea	1stExon-opensea			TRUE
cg11430075	-0.161267	0.499979	-5.82551	3.23844e-05	0.00884834	2.26565	0.580612	0.419345	-0.161267	5	264123	F	II		IGR	shore	IGR-shore	chr5:258801-262401	TRUE	TRUE		rs34511054
cg14652203	0.101421	0.690015	5.82412	3.24676e-05	0.00884834	2.26304	0.639304	0.740725	0.101421	1	174852553	F	II	RABGAP1L	Body	opensea	Body-opensea			TRUE			rs77163658
cg15177359	-0.144939	0.448641	-5.82369	3.24933e-05	0.00884834	2.26223	0.52111	0.376172	-0.144939	17	73840750	F	II	UNC13D	5'UTR	opensea	5'UTR-opensea			TRUE		rs936397
cg16625218	0.11467	0.549154	5.82029	3.26972e-05	0.00888749	2.25586	0.491818	0.606489	0.11467	8	30272502	R	II	RBPMS	Body	opensea	Body-opensea			TRUE
cg15935247	0.19252	0.496069	5.81625	3.29411e-05	0.00893564	2.2483	0.399809	0.592329	0.19252	17	56606842	F	II	SEPT4	TSS200	shelf	TSS200-shelf	chr17:56609025-56609583
cg08102516	0.117875	0.616829	5.81326	3.3123e-05	0.00895748	2.24269	0.557892	0.675766	0.117875	7	3411356	F	II	SDK1	Body	opensea	Body-opensea			TRUE		rs79189403
cg07976359	0.122768	0.559807	5.81288	3.31463e-05	0.00895748	2.24197	0.498423	0.621191	0.122768	19	1718954	F	II		IGR	island	IGR-island	chr19:1718830-1719154
cg12220034	-0.194285	0.511755	-5.81169	3.3219e-05	0.00897137	2.23974	0.608898	0.414613	-0.194285	12	116457644	R	II	MED13L	Body	opensea	Body-opensea			TRUE
cg14396758	0.108405	0.662054	5.8107	3.32801e-05	0.00897366	2.23787	0.607851	0.716256	0.108405	4	37689379	R	II	RELL1	TSS1500	shore	TSS1500-shore	chr4:37687401-37688613
cg05461182	0.11616	0.781054	5.80978	3.33363e-05	0.00897366	2.23616	0.722973	0.839134	0.11616	1	61902105	R	II	NFIA	Body	opensea	Body-opensea			TRUE
cg23474211	0.306283	0.292314	5.80947	3.33554e-05	0.00897366	2.23557	0.139172	0.445455	0.306283	7	88388646	F	I	ZNF804B	TSS200	island	TSS200-island	chr7:88388488-88389283
cg08929399	0.16148	0.677727	5.80762	3.34692e-05	0.00897557	2.23211	0.596987	0.758467	0.16148	3	151778972	R	II		IGR	opensea	IGR-opensea			TRUE
cg04262428	0.102098	0.458925	5.80688	3.35146e-05	0.00898201	2.23073	0.407876	0.509974	0.102098	11	70673256	R	I	SHANK2	Body	shore	Body-shore	chr11:70672834-70673055	TRUE		low-CpG:70350361-70350918
cg13284614	0.165755	0.320626	5.80646	3.35409e-05	0.00898336	2.22993	0.237749	0.403504	0.165755	3	52569169	R	I	NT5DC2	TSS200	shore	TSS200-shore	chr3:52570475-52570842
cg25401010	0.133965	0.872191	5.80367	3.37137e-05	0.0089971	2.2247	0.805208	0.939173	0.133965	18	56529878	F	II	ZNF532	TSS200	shore	TSS200-shore	chr18:56530395-56531288	TRUE
cg13394864	-0.107805	0.446613	-5.80351	3.37239e-05	0.0089971	2.22439	0.500516	0.392711	-0.107805	2	97563733	R	II	FAM178B	1stExon	opensea	1stExon-opensea			TRUE
cg13420075	-0.193922	0.405325	-5.80232	3.37979e-05	0.0089971	2.22216	0.502286	0.308364	-0.193922	15	74471974	R	II	STRA6	3'UTR	opensea	3'UTR-opensea		TRUE	TRUE
cg27067922	-0.14922	0.218614	-5.80104	3.38777e-05	0.0089971	2.21976	0.293224	0.144005	-0.14922	6	147643548	R	II	STXBP5	Body	opensea	Body-opensea			TRUE
cg25256067	0.106065	0.685051	5.79973	3.39593e-05	0.0089971	2.21731	0.632018	0.738083	0.106065	7	11856910	R	II	THSD7A	Body	opensea	Body-opensea			TRUE
cg04002454	-0.137381	0.17116	-5.79967	3.39635e-05	0.0089971	2.21718	0.23985	0.10247	-0.137381	2	231191893	R	II	SP140L	5'UTR	opensea	5'UTR-opensea		TRUE		low-CpG:230900121-230900220
cg19563525	0.140881	0.602458	5.79786	3.40768e-05	0.0089971	2.21379	0.532017	0.672899	0.140881	12	69909397	F	II	FRS2	5'UTR	opensea	5'UTR-opensea			TRUE
cg18442362	-0.177271	0.433818	-5.79705	3.41274e-05	0.0089971	2.21228	0.522454	0.345183	-0.177271	7	44677772	F	II	OGDH	Body	opensea	Body-opensea			TRUE
cg01212010	0.120094	0.698271	5.79538	3.4233e-05	0.0089971	2.20914	0.638224	0.758318	0.120094	10	103484797	F	II		IGR	opensea	IGR-opensea			TRUE
cg02908490	0.124822	0.719395	5.79523	3.42421e-05	0.0089971	2.20887	0.656984	0.781806	0.124822	21	37757070	R	II	CHAF1B	TSS1500	shore	TSS1500-shore	chr21:37757496-37758113
cg02642117	-0.105547	0.531128	-5.78882	3.46499e-05	0.0090709	2.19681	0.583902	0.478354	-0.105547	6	21033836	F	II	CDKAL1	Body	opensea	Body-opensea			TRUE
cg18011760	-0.21654	0.337898	-5.78857	3.46654e-05	0.0090709	2.19636	0.446168	0.229629	-0.21654	2	19320928	R	II		IGR	opensea	IGR-opensea		TRUE	TRUE
cg14981960	-0.226195	0.632805	-5.78688	3.47743e-05	0.00908807	2.19317	0.745903	0.519708	-0.226195	1	68607289	F	II	GPR177	Body	opensea	Body-opensea			TRUE
cg09694272	0.106605	0.80293	5.78468	3.49157e-05	0.00911372	2.18904	0.749627	0.856232	0.106605	13	100254883	R	II		IGR	shelf	IGR-shelf	chr13:100258708-100259220
cg09381917	0.111096	0.761404	5.7843	3.49402e-05	0.00911445	2.18832	0.705856	0.816952	0.111096	6	110094833	F	II	FIG4	Body	opensea	Body-opensea			TRUE		rs13201409
cg16301728	0.12064	0.664736	5.7813	3.51342e-05	0.00914239	2.18269	0.604416	0.725056	0.12064	2	187717549	R	II		IGR	shelf	IGR-shelf	chr2:187713846-187714069
cg27144592	0.158254	0.728175	5.78063	3.51776e-05	0.00914802	2.18143	0.649048	0.807302	0.158254	16	783916	R	II	NARFL	Body	shore	Body-shore	chr16:784367-785034	TRUE
cg14963928	0.112798	0.767278	5.77213	3.57343e-05	0.00923005	2.16545	0.710879	0.823677	0.112798	1	40392088	F	II		IGR	opensea	IGR-opensea			TRUE		rs6658864
cg26579713	0.109542	0.784783	5.76148	3.64446e-05	0.00933329	2.14542	0.730011	0.839554	0.109542	15	65701865	F	II	IGDCC4	Body	opensea	Body-opensea		TRUE	TRUE			rs80157845
cg26247373	0.115683	0.791098	5.76021	3.65302e-05	0.00933814	2.14303	0.733257	0.84894	0.115683	12	57655696	F	II	R3HDM2	Body	opensea	Body-opensea			TRUE
cg24643158	0.153523	0.775828	5.75944	3.65818e-05	0.00933814	2.14159	0.699067	0.85259	0.153523	11	45001657	R	II		IGR	opensea	IGR-opensea		TRUE	TRUE
cg26630791	0.152488	0.380016	5.75786	3.66888e-05	0.00933814	2.13862	0.303772	0.45626	0.152488	5	83017000	F	I	HAPLN1	TSS200	shore	TSS200-shore	chr5:83017894-83018358
cg19483007	0.104187	0.245751	5.75735	3.67238e-05	0.00933814	2.13765	0.193658	0.297845	0.104187	3	149327651	R	II	WWTR1	Body	opensea	Body-opensea			TRUE
cg10959664	0.115811	0.682779	5.75316	3.70091e-05	0.00936951	2.12977	0.624873	0.740684	0.115811	13	98979676	F	II	FARP1	Body	opensea	Body-opensea			TRUE
cg24873022	0.202204	0.486286	5.74201	3.77807e-05	0.00945758	2.10877	0.385184	0.587388	0.202204	4	182905294	R	II		IGR	opensea	IGR-opensea			TRUE
cg13887966	0.101945	0.88804	5.73258	3.84467e-05	0.00954355	2.09099	0.837068	0.939013	0.101945	15	59568712	F	II	MYO1E	Body	opensea	Body-opensea			TRUE
cg20118840	0.153947	0.664211	5.73253	3.84504e-05	0.00954355	2.09089	0.587238	0.741185	0.153947	11	119928838	R	II		IGR	opensea	IGR-opensea			TRUE
cg03333377	0.141448	0.499036	5.73023	3.86148e-05	0.00955955	2.08655	0.428312	0.56976	0.141448	11	93277841	R	II	C11orf75	TSS1500	shore	TSS1500-shore	chr11:93275814-93276721
cg26865084	0.107153	0.684614	5.72743	3.88155e-05	0.00958119	2.08127	0.631037	0.73819	0.107153	6	169223825	F	II		IGR	shelf	IGR-shelf	chr6:169226157-169226419
cg11259254	0.102867	0.733657	5.72602	3.89173e-05	0.00958961	2.07861	0.682223	0.78509	0.102867	10	52366029	F	II	SGMS1	5'UTR	opensea	5'UTR-opensea			TRUE
cg06500792	-0.190038	0.368794	-5.72378	3.9079e-05	0.00960528	2.07439	0.463813	0.273775	-0.190038	2	65006618	R	II		IGR	opensea	IGR-opensea		TRUE	TRUE
cg19251656	-0.15191	0.482379	-5.72181	3.92216e-05	0.00960632	2.07068	0.558334	0.406424	-0.15191	1	100000372	F	II		IGR	opensea	IGR-opensea			TRUE
cg16226866	-0.238098	0.380455	-5.71922	3.94106e-05	0.00963109	2.06579	0.499504	0.261406	-0.238098	6	110418140	F	II		IGR	opensea	IGR-opensea			TRUE
cg11170956	0.102417	0.778358	5.7177	3.95218e-05	0.00963839	2.06292	0.727149	0.829566	0.102417	8	119038325	R	II	EXT1	Body	opensea	Body-opensea			TRUE
cg21937128	0.107904	0.775594	5.7156	3.96764e-05	0.00965554	2.05895	0.721642	0.829546	0.107904	1	150971889	F	II	FAM63A	Body	opensea	Body-opensea			TRUE
cg13711966	0.116349	0.775772	5.71389	3.98021e-05	0.00966824	2.05573	0.717597	0.833947	0.116349	2	42071660	R	II		IGR	shelf	IGR-shelf	chr2:42067937-42068203
cg12044531	-0.162312	0.791638	-5.70862	4.01937e-05	0.00971726	2.04577	0.872794	0.710481	-0.162312	14	51187290	R	II	NIN	3'UTR	opensea	3'UTR-opensea			TRUE
cg12199221	0.200292	0.482053	5.70835	4.02132e-05	0.00971726	2.04527	0.381907	0.582199	0.200292	5	83017078	F	II	HAPLN1	TSS200	shore	TSS200-shore	chr5:83017894-83018358
cg15797834	-0.132848	0.331075	-5.70406	4.05353e-05	0.00974715	2.03716	0.397498	0.264651	-0.132848	19	4338932	F	II	STAP2	TSS200	opensea	TSS200-opensea		TRUE
cg21101631	0.110194	0.550466	5.70184	4.07022e-05	0.00976777	2.03298	0.495369	0.605563	0.110194	5	140874572	R	II	PCDHGA4	Body	shelf	Body-shelf	chr5:140871064-140872335		TRUE
cg03551963	0.110065	0.374136	5.70129	4.07439e-05	0.00976777	2.03193	0.319103	0.429169	0.110065	5	39502320	R	II		IGR	opensea	IGR-opensea			TRUE
cg05891054	-0.169535	0.499134	-5.69978	4.08589e-05	0.00977518	2.02907	0.583902	0.414366	-0.169535	17	40380254	F	II	STAT5B	Body	opensea	Body-opensea			TRUE		rs78228048
cg27342333	-0.121002	0.467295	-5.69939	4.08882e-05	0.00977518	2.02834	0.527796	0.406794	-0.121002	7	75592418	R	II	POR	Body	opensea	Body-opensea		TRUE	TRUE
cg22340807	0.122525	0.795315	5.69891	4.09247e-05	0.00977835	2.02743	0.734053	0.856577	0.122525	1	61378118	F	II		IGR	opensea	IGR-opensea			TRUE
cg01963059	-0.137716	0.40015	-5.69775	4.10131e-05	0.00978432	2.02523	0.469008	0.331292	-0.137716	1	116658288	F	II	C1orf161	Body	opensea	Body-opensea		TRUE	TRUE
cg12630018	0.105505	0.868137	5.69306	4.13714e-05	0.00983048	2.01638	0.815384	0.920889	0.105505	20	1294858	R	II	SDCBP2	TSS1500	shore	TSS1500-shore	chr20:1293681-1294328					rs6041333
cg23695222	0.144569	0.331456	5.69148	4.14933e-05	0.00983048	2.01339	0.259172	0.403741	0.144569	8	29833265	F	II		IGR	opensea	IGR-opensea			TRUE		rs10104405
cg21461281	0.140091	0.70272	5.69008	4.16012e-05	0.00983901	2.01074	0.632674	0.772766	0.140091	7	11730278	R	II	THSD7A	Body	opensea	Body-opensea			TRUE		rs77962025
cg27531236	-0.119915	0.582252	-5.68576	4.19372e-05	0.00987448	2.00256	0.64221	0.522294	-0.119915	4	47854334	F	II	NFXL1	Body	opensea	Body-opensea			TRUE
cg00025439	0.14145	0.217117	5.68514	4.19854e-05	0.00988031	2.00139	0.146392	0.287842	0.14145	16	87856450	R	I		IGR	opensea	IGR-opensea		TRUE			rs76069656	rs4329924
cg12420948	-0.110623	0.866903	-5.67992	4.23948e-05	0.00992197	1.99152	0.922215	0.811592	-0.110623	6	33358593	R	II	KIFC1	TSS1500	shore	TSS1500-shore	chr6:33359097-33359975
cg25028639	0.131001	0.634931	5.67925	4.24479e-05	0.00992197	1.99024	0.56943	0.700431	0.131001	11	9884897	R	II	SBF2	Body	opensea	Body-opensea			TRUE
cg02451502	0.104819	0.762285	5.67889	4.24759e-05	0.00992197	1.98957	0.709875	0.814694	0.104819	13	22486732	F	II		IGR	opensea	IGR-opensea			TRUE		rs4769176
cg23341089	-0.139634	0.504498	-5.67789	4.25551e-05	0.00992197	1.98768	0.574315	0.434681	-0.139634	10	36238934	R	II		IGR	opensea	IGR-opensea			TRUE
cg21727223	-0.18346	0.234403	-5.67333	4.29179e-05	0.00996047	1.97904	0.326133	0.142673	-0.18346	17	66755770	F	II		IGR	opensea	IGR-opensea			TRUE
cg21960474	0.162497	0.565325	5.67286	4.29552e-05	0.00996363	1.97816	0.484077	0.646574	0.162497	1	222025294	R	II		IGR	opensea	IGR-opensea			TRUE
cg01962471	0.105995	0.759667	5.67157	4.30583e-05	0.00996641	1.97572	0.706669	0.812665	0.105995	6	157876936	F	II	ZDHHC14	Body	opensea	Body-opensea			TRUE		rs35291692
cg17172308	0.166285	0.408954	5.67088	4.31138e-05	0.00996641	1.97441	0.325811	0.492096	0.166285	6	168533631	R	I		IGR	shelf	IGR-shelf	chr6:168529982-168530307	TRUE	TRUE
cg03967448	-0.175775	0.531297	-5.67064	4.3133e-05	0.00996641	1.97395	0.619185	0.443409	-0.175775	6	3527443	R	II		IGR	opensea	IGR-opensea			TRUE
cg26895569	0.123479	0.575379	5.66957	4.32191e-05	0.00997536	1.97192	0.51364	0.637119	0.123479	1	204329222	F	II	PLEKHA6	TSS200	opensea	TSS200-opensea		TRUE
cg12153373	0.111052	0.572405	5.66566	4.35351e-05	0.0100012	1.96451	0.516879	0.627931	0.111052	2	113058725	R	II	ZC3H6	Body	opensea	Body-opensea			TRUE
cg17846122	-0.185437	0.42691	-5.66363	4.37e-05	0.0100105	1.96066	0.519629	0.334192	-0.185437	17	64351144	F	II	PRKCA	Body	opensea	Body-opensea			TRUE
cg12656896	0.128613	0.527505	5.66357	4.37046e-05	0.0100105	1.96056	0.463199	0.591812	0.128613	6	8438818	R	II		IGR	shelf	IGR-shelf	chr6:8435314-8436141
cg20520888	0.134605	0.61668	5.66318	4.3736e-05	0.0100123	1.95983	0.549377	0.683982	0.134605	8	145086243	R	II	SPATC1	TSS1500	opensea	TSS1500-opensea
cg14334245	0.144673	0.627784	5.66162	4.38639e-05	0.0100357	1.95686	0.555448	0.700121	0.144673	18	76782696	F	II		IGR	island	IGR-island	chr18:76782657-76782896
cg12850822	0.100069	0.687387	5.65904	4.40744e-05	0.0100521	1.95199	0.637353	0.737421	0.100069	14	71239883	F	II	MAP3K9	Body	opensea	Body-opensea			TRUE
cg11875044	0.141973	0.299227	5.65837	4.41298e-05	0.0100587	1.95071	0.22824	0.370213	0.141973	10	8546509	F	I		IGR	opensea	IGR-opensea
cg24922129	0.196147	0.407577	5.65713	4.42319e-05	0.0100671	1.94836	0.309504	0.50565	0.196147	11	129242530	R	I		IGR	shore	IGR-shore	chr11:129242958-129243457
cg20897479	0.144439	0.654311	5.65472	4.4431e-05	0.0100891	1.94379	0.582092	0.726531	0.144439	11	12292577	R	II		IGR	opensea	IGR-opensea			TRUE
cg26307728	0.154082	0.630813	5.6521	4.46486e-05	0.0101098	1.93882	0.553772	0.707854	0.154082	1	156081268	F	II		IGR	shelf	IGR-shelf	chr1:156084486-156085097
cg08262534	0.101199	0.742374	5.64958	4.48588e-05	0.010127	1.93404	0.691774	0.792973	0.101199	3	109072059	F	II		IGR	opensea	IGR-opensea			TRUE
cg13100962	0.121458	0.167491	5.64847	4.49518e-05	0.010127	1.93193	0.106762	0.22822	0.121458	11	33921158	R	II		IGR	opensea	IGR-opensea		TRUE	TRUE
cg08307963	0.100446	0.252524	5.64821	4.49735e-05	0.010127	1.93144	0.202302	0.302747	0.100446	1	147245485	R	II	GJA5	TSS200	opensea	TSS200-opensea			TRUE		rs791286	rs55654733
cg06092948	-0.135127	0.136221	-5.64752	4.50313e-05	0.010127	1.93013	0.203784	0.0686573	-0.135127	10	91061294	F	II	IFIT2	TSS1500	opensea	TSS1500-opensea
cg08694107	-0.123608	0.729142	-5.64668	4.51016e-05	0.0101287	1.92855	0.790946	0.667339	-0.123608	5	149607327	F	II	CAMK2A	Body	opensea	Body-opensea			TRUE
cg09632936	0.108536	0.560777	5.64628	4.51351e-05	0.0101287	1.92779	0.506509	0.615044	0.108536	4	40337262	F	II	CHRNA9	TSS1500	opensea	TSS1500-opensea			TRUE		rs4359945
cg02619001	0.15544	0.449826	5.64356	4.53651e-05	0.0101653	1.92262	0.372106	0.527546	0.15544	17	47592333	R	II	NGFR	3'UTR	shore	3'UTR-shore	chr17:47590142-47590415		TRUE
cg07603511	0.10469	0.673159	5.64058	4.56178e-05	0.0102053	1.91697	0.620814	0.725504	0.10469	5	174160335	F	I		IGR	shore	IGR-shore	chr5:174158680-174159729
cg19111265	-0.15019	0.556573	-5.63863	4.57837e-05	0.0102197	1.91327	0.631668	0.481478	-0.15019	7	143106537	R	II	EPHA1	TSS1500	opensea	TSS1500-opensea
cg18027174	-0.112137	0.351961	-5.63779	4.58558e-05	0.0102205	1.91168	0.40803	0.295893	-0.112137	3	119298236	R	II	ADPRH	TSS1500	shore	TSS1500-shore	chr3:119298284-119298983		TRUE
cg09251959	0.142642	0.478455	5.63753	4.5878e-05	0.0102205	1.91118	0.407134	0.549776	0.142642	1	32170507	F	II	COL16A1	TSS1500	shore	TSS1500-shore	chr1:32169537-32169869	TRUE	TRUE		rs77656709
cg00574196	0.210291	0.460539	5.63569	4.60353e-05	0.0102326	1.9077	0.355393	0.565684	0.210291	1	22137992	F	II	LDLRAD2	TSS1500	shelf	TSS1500-shelf	chr1:22140891-22141407				rs79499685
cg00549561	-0.113043	0.488991	-5.63508	4.6088e-05	0.0102388	1.90654	0.545513	0.43247	-0.113043	16	22296110	F	II	EEF2K	3'UTR	opensea	3'UTR-opensea			TRUE
cg23560676	-0.205745	0.592274	-5.63474	4.61176e-05	0.0102399	1.90588	0.695147	0.489401	-0.205745	8	126272469	F	II	NSMCE2	Body	opensea	Body-opensea		TRUE	TRUE
cg07620230	0.133265	0.625883	5.62726	4.6766e-05	0.0102923	1.89168	0.55925	0.692516	0.133265	20	62328084	R	II	TNFRSF6B	5'UTR	island	5'UTR-island	chr20:62328013-62328558		TRUE
cg09558069	0.110784	0.692648	5.62722	4.67693e-05	0.0102923	1.89161	0.637257	0.74804	0.110784	1	153510896	F	II	S100A5	Body	shelf	Body-shelf	chr1:153508424-153508840	TRUE
cg19958750	0.122279	0.600935	5.62645	4.68364e-05	0.0103017	1.89015	0.539795	0.662074	0.122279	2	85660790	F	II	SH2D6	TSS1500	shelf	TSS1500-shelf	chr2:85664694-85665055	TRUE				rs62164761
cg05243267	-0.10001	0.78473	-5.62233	4.71983e-05	0.0103428	1.88232	0.834735	0.734725	-0.10001	4	145275499	R	II		IGR	opensea	IGR-opensea			TRUE			rs76300810
cg03534504	0.135434	0.604232	5.61936	4.74605e-05	0.0103651	1.87668	0.536515	0.671949	0.135434	5	171594998	R	II	STK10	Body	opensea	Body-opensea			TRUE
cg19600372	0.105539	0.769022	5.61887	4.75043e-05	0.0103651	1.87574	0.716252	0.821791	0.105539	3	58158888	F	II		IGR	opensea	IGR-opensea			TRUE
cg11212234	0.139504	0.70323	5.61619	4.77426e-05	0.0103924	1.87065	0.633478	0.772982	0.139504	5	74353351	F	II		IGR	shelf	IGR-shelf	chr5:74348241-74349681
cg06039161	0.125811	0.771174	5.61467	4.78786e-05	0.0103992	1.86776	0.708269	0.83408	0.125811	11	70672835	R	II	SHANK2	Body	island	Body-island	chr11:70672834-70673055	TRUE		low-CpG:70350361-70350918
cg08881785	0.109941	0.219848	5.61404	4.7935e-05	0.0103992	1.86656	0.164878	0.274819	0.109941	3	155465076	R	II		IGR	shelf	IGR-shelf	chr3:155461917-155462561		TRUE
cg26690127	-0.126285	0.390191	-5.61057	4.82469e-05	0.010432	1.85997	0.453333	0.327048	-0.126285	2	37545602	R	II	PRKD3	TSS1500	opensea	TSS1500-opensea			TRUE
cg16606320	0.173648	0.311573	5.60709	4.85612e-05	0.0104693	1.85336	0.224749	0.398397	0.173648	4	56685972	R	II	LOC644145	TSS1500	opensea	TSS1500-opensea			TRUE
cg01263407	0.149701	0.689681	5.60643	4.86212e-05	0.0104693	1.85211	0.61483	0.764531	0.149701	10	8138058	R	II		IGR	opensea	IGR-opensea
cg19374752	0.117457	0.267789	5.60594	4.86666e-05	0.0104693	1.85116	0.209061	0.326518	0.117457	12	52404151	R	II	GRASP	Body	shelf	Body-shelf	chr12:52400467-52401696	TRUE	TRUE
cg14112601	0.138432	0.262047	5.60235	4.89944e-05	0.0104872	1.84433	0.192831	0.331263	0.138432	6	10520874	F	II	GCNT2	TSS1500	opensea	TSS1500-opensea			TRUE			rs79893863
cg24461171	-0.114485	0.724435	-5.60189	4.90359e-05	0.0104872	1.84347	0.781677	0.667193	-0.114485	1	197745025	R	II	DENND1B	TSS1500	shore	TSS1500-shore	chr1:197743931-197744788		TRUE
cg16718760	0.234938	0.554562	5.59939	4.92662e-05	0.010496	1.8387	0.437093	0.672031	0.234938	3	55721067	R	II	ERC2	Body	opensea	Body-opensea			TRUE
cg19818308	0.127059	0.42387	5.59858	4.93404e-05	0.0105064	1.83717	0.360341	0.4874	0.127059	14	75946745	R	II		IGR	opensea	IGR-opensea			TRUE
cg17200137	0.120983	0.531453	5.59242	4.99126e-05	0.0105732	1.82544	0.470962	0.591945	0.120983	10	48416896	F	II	GDF2	TSS200	shelf	TSS200-shelf	chr10:48413741-48413968				rs76241298
cg09246878	0.100043	0.711951	5.58863	5.02676e-05	0.0106166	1.81823	0.66193	0.761972	0.100043	4	160304826	F	II		IGR	opensea	IGR-opensea			TRUE
cg25494156	-0.111007	0.795098	-5.5886	5.02707e-05	0.0106166	1.81817	0.850601	0.739594	-0.111007	8	144824233	F	II		IGR	shore	IGR-shore	chr8:144822011-144822805
cg03100044	0.106952	0.598603	5.5831	5.07914e-05	0.0106518	1.80769	0.545126	0.652079	0.106952	7	29519450	F	II	CHN2	TSS200	opensea	TSS200-opensea			TRUE		rs3828977
cg13662121	0.106713	0.643719	5.58157	5.09373e-05	0.0106577	1.80477	0.590362	0.697075	0.106713	6	36644997	R	II	CDKN1A	TSS1500	shore	TSS1500-shore	chr6:36646244-36648465		TRUE
cg19992474	0.102535	0.731156	5.57929	5.11552e-05	0.0106873	1.80043	0.679888	0.782424	0.102535	7	154985807	F	II		IGR	opensea	IGR-opensea					rs77041905
cg03619586	0.11208	0.550424	5.57745	5.13314e-05	0.0106889	1.79693	0.494384	0.606465	0.11208	6	31705409	R	II	CLIC1	TSS1500	shelf	TSS1500-shelf	chr6:31707489-31708336		TRUE
cg04101806	0.13685	0.700224	5.57626	5.14461e-05	0.0107033	1.79466	0.631799	0.768649	0.13685	2	100722584	R	II	AFF3	TSS1500	shore	TSS1500-shore	chr2:100720385-100720741		TRUE
cg01942226	-0.18472	0.517614	-5.57611	5.14607e-05	0.0107033	1.79437	0.609974	0.425254	-0.18472	4	154218350	F	II	TRIM2	Body	shore	Body-shore	chr4:154216592-154217215		TRUE
cg11779239	0.103166	0.746243	5.57185	5.18737e-05	0.0107462	1.78625	0.69466	0.797826	0.103166	17	73762276	R	II	GALK1	TSS1500	shore	TSS1500-shore	chr17:73760694-73761269
cg26344392	0.124827	0.607818	5.57161	5.18966e-05	0.0107462	1.7858	0.545404	0.670231	0.124827	1	167825464	F	II	ADCY10	Body	opensea	Body-opensea			TRUE		rs2071921	rs34461651
cg14720024	0.107377	0.760603	5.57072	5.19832e-05	0.0107483	1.7841	0.706914	0.814291	0.107377	5	115697696	F	II		IGR	shore	IGR-shore	chr5:115697134-115697589		TRUE
cg26525313	0.115594	0.879161	5.56925	5.21266e-05	0.0107673	1.7813	0.821364	0.936957	0.115594	6	139466669	F	II	HECA	Body	opensea	Body-opensea			TRUE
cg17462107	0.199162	0.512741	5.56801	5.22481e-05	0.0107766	1.77893	0.41316	0.612322	0.199162	5	66199867	F	II	MAST4	Body	opensea	Body-opensea			TRUE
cg04718050	0.104726	0.468848	5.56408	5.26344e-05	0.0108073	1.77144	0.416485	0.521211	0.104726	14	69281297	F	II		IGR	shore	IGR-shore	chr14:69283046-69283605	TRUE	TRUE
cg12716367	0.102334	0.655364	5.56388	5.26541e-05	0.0108073	1.77106	0.604197	0.706531	0.102334	8	17625476	F	II	MTUS1	5'UTR	opensea	5'UTR-opensea			TRUE
cg14477581	0.106863	0.617118	5.56329	5.27125e-05	0.010814	1.76993	0.563687	0.670549	0.106863	9	72899321	F	II	SMC5	Body	opensea	Body-opensea			TRUE
cg20768638	-0.144313	0.330227	-5.56205	5.28351e-05	0.0108151	1.76757	0.402383	0.25807	-0.144313	3	36950004	F	II	TRANK1	Body	opensea	Body-opensea		TRUE		low-CpG:36924951-36925067	rs58927290
cg14602839	0.132726	0.598509	5.56138	5.29013e-05	0.0108158	1.7663	0.532146	0.664872	0.132726	17	63060161	R	II		IGR	opensea	IGR-opensea			TRUE
cg10455940	0.153828	0.530886	5.55313	5.3727e-05	0.0109022	1.75054	0.453972	0.6078	0.153828	10	103213706	R	II	BTRC	Body	opensea	Body-opensea			TRUE
cg02151101	0.119546	0.714347	5.55114	5.39281e-05	0.010916	1.74674	0.654575	0.77412	0.119546	4	53439190	R	II		IGR	opensea	IGR-opensea			TRUE
cg04737087	-0.14231	0.518342	-5.55076	5.39668e-05	0.010916	1.74601	0.589497	0.447187	-0.14231	2	71205052	R	II	ANKRD53	TSS1500	shore	TSS1500-shore	chr2:71205563-71206529	TRUE	TRUE
cg23666374	-0.14887	0.552708	-5.55044	5.39988e-05	0.010916	1.74541	0.627143	0.478273	-0.14887	7	69120991	R	II	AUTS2	Body	opensea	Body-opensea			TRUE
cg03031932	0.109726	0.714331	5.54887	5.41582e-05	0.010916	1.74241	0.659468	0.769194	0.109726	16	81547138	R	II	CMIP	Body	opensea	Body-opensea			TRUE
cg10753610	0.224183	0.296251	5.54793	5.42543e-05	0.0109226	1.74061	0.184159	0.408342	0.224183	17	45335202	R	II	ITGB3	Body	shelf	Body-shelf	chr17:45330928-45331766	TRUE	TRUE			rs35184018
cg19398269	0.120775	0.718229	5.54549	5.45026e-05	0.0109435	1.73597	0.657842	0.778617	0.120775	6	28678460	F	II		IGR	opensea	IGR-opensea
cg19605623	0.129027	0.764078	5.54429	5.4626e-05	0.010946	1.73367	0.699565	0.828591	0.129027	3	159579349	R	II	SCHIP1	Body	opensea	Body-opensea			TRUE
cg08124461	0.100811	0.703204	5.54406	5.46499e-05	0.010946	1.73322	0.652798	0.753609	0.100811	15	57818971	R	II	CGNL1	Body	opensea	Body-opensea			TRUE
cg25254074	0.112498	0.183751	5.54131	5.49323e-05	0.0109765	1.72798	0.127502	0.24	0.112498	6	41607326	F	II	MDFI	Body	shore	Body-shore	chr6:41604583-41606663	TRUE
cg00050482	0.119352	0.387879	5.53974	5.50949e-05	0.0109869	1.72498	0.328203	0.447555	0.119352	16	73207213	F	II		IGR	opensea	IGR-opensea			TRUE
cg16404259	-0.148222	0.773865	-5.53899	5.51721e-05	0.0109969	1.72355	0.847976	0.699754	-0.148222	20	12988931	R	II	SPTLC3	TSS1500	opensea	TSS1500-opensea
cg12069540	0.114222	0.410757	5.53617	5.54652e-05	0.0110277	1.71816	0.353646	0.467868	0.114222	10	82173570	F	II	C10orf58	TSS200	opensea	TSS200-opensea			TRUE
cg26248114	0.112934	0.715356	5.53507	5.55808e-05	0.0110277	1.71605	0.658889	0.771823	0.112934	1	56901693	F	II		IGR	opensea	IGR-opensea			TRUE
cg10275766	0.11476	0.587444	5.53477	5.56112e-05	0.0110277	1.71549	0.530064	0.644824	0.11476	2	173591150	R	II	LOC91149	Body	opensea	Body-opensea			TRUE
cg11120450	0.158376	0.719405	5.53472	5.56168e-05	0.0110277	1.71539	0.640218	0.798593	0.158376	15	101768079	R	II	CHSY1	Body	opensea	Body-opensea			TRUE
cg16137498	0.104874	0.570333	5.53449	5.56412e-05	0.0110277	1.71494	0.517896	0.622769	0.104874	10	101286541	R	II		IGR	shore	IGR-shore	chr10:101287162-101287920
cg24211657	-0.14115	0.491329	-5.53423	5.56678e-05	0.0110278	1.71446	0.561904	0.420754	-0.14115	17	76886742	R	II	TIMP2	Body	opensea	Body-opensea			TRUE
cg11873311	0.173614	0.547887	5.52864	5.62558e-05	0.011061	1.70377	0.46108	0.634694	0.173614	2	128953231	R	II	UGGT1	Body	opensea	Body-opensea			TRUE
cg01876531	0.126591	0.619783	5.52738	5.63891e-05	0.0110699	1.70136	0.556487	0.683078	0.126591	1	208405868	R	II	PLXNA2	5'UTR	opensea	5'UTR-opensea			TRUE
cg02153681	-0.134997	0.45143	-5.52699	5.64309e-05	0.0110699	1.70061	0.518929	0.383932	-0.134997	2	20714818	R	II		IGR	opensea	IGR-opensea		TRUE	TRUE
cg23785859	0.154533	0.633825	5.52646	5.64874e-05	0.0110715	1.69959	0.556559	0.711092	0.154533	6	11475157	R	II		IGR	opensea	IGR-opensea			TRUE			rs80290196
cg27095222	-0.183729	0.351348	-5.5264	5.64937e-05	0.0110715	1.69948	0.443212	0.259484	-0.183729	11	88090861	R	II		IGR	opensea	IGR-opensea			TRUE
cg22453435	0.15734	0.239474	5.52431	5.67161e-05	0.0111015	1.69548	0.160804	0.318144	0.15734	4	38667430	F	II	FLJ13197	TSS1500	shore	TSS1500-shore	chr4:38664649-38666531
cg02331769	0.105991	0.579853	5.52422	5.67258e-05	0.0111015	1.69531	0.526858	0.632849	0.105991	1	41487940	F	II	SLFNL1	TSS1500	opensea	TSS1500-opensea			TRUE
cg05548952	0.135503	0.415303	5.523	5.68561e-05	0.0111218	1.69298	0.347552	0.483055	0.135503	X	129068271	F	II		IGR	shore	IGR-shore	chrX:129066633-129067227				rs7891980
cg26635451	0.128326	0.548756	5.52106	5.70633e-05	0.0111311	1.68928	0.484593	0.612919	0.128326	12	89749142	F	II		IGR	shore	IGR-shore	chr12:89745168-89748144				rs75203642
cg26010218	0.152855	0.374716	5.52083	5.70885e-05	0.0111311	1.68883	0.298288	0.451143	0.152855	4	78977223	R	I	FRAS1	TSS1500	shore	TSS1500-shore	chr4:78978365-78979256
cg02268192	0.10697	0.689592	5.5196	5.72212e-05	0.0111337	1.68647	0.636107	0.743077	0.10697	14	92981666	R	II	RIN3	Body	shore	Body-shore	chr14:92979726-92981228	TRUE
cg06291484	0.396258	0.374177	5.51898	5.72874e-05	0.0111337	1.68529	0.176048	0.572306	0.396258	11	94245547	R	II		IGR	island	IGR-island	chr11:94245546-94245891	TRUE	TRUE
cg25252017	0.104098	0.772143	5.51595	5.76149e-05	0.011151	1.6795	0.720094	0.824192	0.104098	6	158234655	R	II		IGR	opensea	IGR-opensea			TRUE
cg02382426	0.202073	0.617327	5.51532	5.76833e-05	0.0111588	1.67829	0.51629	0.718363	0.202073	11	8954606	R	I	C11orf16	TSS200	opensea	TSS200-opensea			TRUE
cg23980915	0.140431	0.617687	5.51295	5.79412e-05	0.0111834	1.67376	0.547471	0.687902	0.140431	6	76456187	F	II		IGR	shelf	IGR-shelf	chr6:76458437-76459267
cg06450976	0.209868	0.463412	5.51262	5.79775e-05	0.0111834	1.67312	0.358478	0.568346	0.209868	6	106512194	F	II		IGR	opensea	IGR-opensea			TRUE
cg26540004	-0.131666	0.261727	-5.51195	5.80501e-05	0.0111884	1.67185	0.32756	0.195894	-0.131666	5	54932693	R	II	SLC38A9	Body	opensea	Body-opensea			TRUE			rs74993308
cg03118021	0.174044	0.767263	5.51102	5.81524e-05	0.0111884	1.67006	0.68024	0.854285	0.174044	6	1838155	F	II	GMDS	Body	opensea	Body-opensea			TRUE
cg23683146	0.131505	0.777991	5.50973	5.8293e-05	0.0111968	1.6676	0.712238	0.843743	0.131505	12	47057850	F	II		IGR	opensea	IGR-opensea			TRUE
cg07503785	0.12427	0.666831	5.50939	5.83306e-05	0.0111968	1.66695	0.604696	0.728966	0.12427	11	76033473	F	II		IGR	shore	IGR-shore	chr11:76032911-76033392		TRUE
cg02771744	0.241719	0.43992	5.50648	5.86514e-05	0.0112235	1.66137	0.31906	0.560779	0.241719	7	7995879	R	II		IGR	opensea	IGR-opensea			TRUE
cg16847760	0.112646	0.558758	5.49936	5.94428e-05	0.011319	1.64774	0.502435	0.615081	0.112646	8	28912915	F	II		IGR	opensea	IGR-opensea			TRUE
cg02805890	0.145729	0.173489	5.49807	5.95874e-05	0.01132	1.64527	0.100625	0.246354	0.145729	6	27778836	F	II		IGR	shore	IGR-shore	chr6:27777855-27778251
cg08173709	0.160197	0.796441	5.49683	5.97272e-05	0.0113356	1.64289	0.716343	0.87654	0.160197	3	71103443	R	II	FOXP1	Body	opensea	Body-opensea			TRUE
cg13679772	0.128178	0.575969	5.49439	6.00026e-05	0.0113735	1.63821	0.51188	0.640058	0.128178	14	89933549	F	II	FOXN3	5'UTR	opensea	5'UTR-opensea			TRUE
cg24852561	0.13603	0.673028	5.4928	6.01827e-05	0.0113937	1.63516	0.605014	0.741043	0.13603	13	100340080	F	II	CLYBL	Body	opensea	Body-opensea			TRUE
cg08038033	0.102573	0.715179	5.49174	6.03027e-05	0.0113937	1.63314	0.663892	0.766465	0.102573	3	71354056	R	II	FOXP1	5'UTR	opensea	5'UTR-opensea			TRUE
cg25941682	0.172714	0.577814	5.49173	6.0304e-05	0.0113937	1.63312	0.491457	0.664171	0.172714	15	85568604	R	II	PDE8A	Body	opensea	Body-opensea			TRUE
cg16588163	-0.193651	0.399423	-5.48948	6.05608e-05	0.0114218	1.6288	0.496249	0.302598	-0.193651	3	190251464	R	I	IL1RAP	5'UTR	opensea	5'UTR-opensea		TRUE	TRUE
cg17959824	0.156912	0.797027	5.4891	6.06036e-05	0.0114218	1.62808	0.718571	0.875483	0.156912	11	70391706	F	II	SHANK2	Body	opensea	Body-opensea		TRUE	TRUE
cg02909789	0.14879	0.527226	5.489	6.06156e-05	0.0114218	1.62788	0.452831	0.60162	0.14879	14	68386026	F	II	RAD51L1	Body	opensea	Body-opensea			TRUE
cg02007534	0.107349	0.725357	5.48789	6.07419e-05	0.0114309	1.62576	0.671683	0.779032	0.107349	16	28939378	R	II		IGR	shelf	IGR-shelf	chr16:28936053-28937036
cg16744911	0.137461	0.535642	5.48598	6.09611e-05	0.0114599	1.6221	0.466911	0.604372	0.137461	10	102108974	F	II	SCD	Body	shore	Body-shore	chr10:102106182-102107722		TRUE
cg07119973	0.103722	0.63374	5.48547	6.10197e-05	0.0114599	1.62112	0.581879	0.685602	0.103722	17	43109221	R	II	DCAKD	Body	shelf	Body-shelf	chr17:43111525-43111732		TRUE
cg05495546	0.12961	0.733397	5.4851	6.10631e-05	0.0114599	1.6204	0.668592	0.798202	0.12961	5	113390551	R	II		IGR	shore	IGR-shore	chr5:113391071-113392005
cg00119314	0.120609	0.432963	5.48298	6.1307e-05	0.0114955	1.61635	0.372658	0.493267	0.120609	17	48555610	F	II	RSAD1	TSS1500	shore	TSS1500-shore	chr17:48556004-48556509
cg27585345	0.126316	0.814483	5.48079	6.15613e-05	0.0115208	1.61214	0.751325	0.877641	0.126316	1	22138381	R	II	LDLRAD2	TSS1500	shelf	TSS1500-shelf	chr1:22140891-22141407
cg11172682	0.12004	0.717175	5.47938	6.1725e-05	0.0115303	1.60944	0.657155	0.777195	0.12004	5	150485006	R	II	ANXA6	Body	opensea	Body-opensea			TRUE
cg25407979	0.107819	0.338611	5.47645	6.2067e-05	0.0115536	1.60382	0.284701	0.392521	0.107819	1	204256846	F	I	PLEKHA6	5'UTR	opensea	5'UTR-opensea			TRUE
cg25274468	0.129545	0.684674	5.47503	6.22332e-05	0.0115661	1.6011	0.619901	0.749447	0.129545	7	114570498	F	II	MDFIC	Body	opensea	Body-opensea			TRUE		rs74543785
cg19649900	-0.129777	0.440316	-5.4733	6.24372e-05	0.0115682	1.59778	0.505205	0.375428	-0.129777	19	1155030	F	I	SBNO2	5'UTR	island	5'UTR-island	chr19:1155020-1155305		TRUE
cg07236594	0.103066	0.598019	5.46728	6.31501e-05	0.0116592	1.58623	0.546486	0.649552	0.103066	2	128989000	F	II		IGR	shore	IGR-shore	chr2:128990509-128991325
cg13916835	0.157871	0.466365	5.46555	6.33569e-05	0.0116776	1.58291	0.387429	0.5453	0.157871	17	2078431	F	II	SMG6	Body	opensea	Body-opensea		TRUE	TRUE
cg04915618	0.217487	0.311064	5.46426	6.35121e-05	0.0116956	1.58042	0.202321	0.419808	0.217487	3	124304960	R	II	KALRN	Body	shore	Body-shore	chr3:124303529-124304092		TRUE
cg09547025	0.23704	0.462589	5.46424	6.3514e-05	0.0116956	1.58039	0.344069	0.581109	0.23704	6	142721804	F	II	GPR126	Body	opensea	Body-opensea			TRUE		rs75681571
cg15280358	0.170586	0.468404	5.46253	6.37194e-05	0.0117208	1.57711	0.383111	0.553697	0.170586	10	127904472	R	II	ADAM12	Body	opensea	Body-opensea			TRUE
cg06543055	0.140039	0.555513	5.46186	6.3801e-05	0.0117228	1.57581	0.485493	0.625532	0.140039	1	59903010	F	II	FGGY	Body	opensea	Body-opensea			TRUE
cg19770281	-0.183301	0.290343	-5.45914	6.41295e-05	0.0117626	1.57059	0.381994	0.198693	-0.183301	3	132261993	F	II		IGR	opensea	IGR-opensea		TRUE	TRUE
cg07190947	0.170522	0.688198	5.45889	6.41594e-05	0.011763	1.57012	0.602937	0.773459	0.170522	11	70349808	F	II	SHANK2	Body	opensea	Body-opensea			TRUE
cg07835482	-0.151189	0.685942	-5.45681	6.44117e-05	0.0117733	1.56613	0.761537	0.610348	-0.151189	2	182656091	F	II		IGR	opensea	IGR-opensea			TRUE
cg22529664	0.147358	0.339459	5.45272	6.49113e-05	0.011821	1.55827	0.26578	0.413138	0.147358	8	37418924	F	I		IGR	opensea	IGR-opensea			TRUE
cg07013698	-0.165598	0.682819	-5.45203	6.49962e-05	0.011821	1.55694	0.765618	0.600021	-0.165598	17	80174780	F	II		IGR	shelf	IGR-shelf	chr17:80170322-80171302	TRUE	TRUE
cg04764839	-0.165664	0.47235	-5.45203	6.49967e-05	0.011821	1.55694	0.555182	0.389518	-0.165664	10	18708076	R	II	CACNB2	Body	opensea	Body-opensea			TRUE
cg20539283	0.165695	0.545977	5.44813	6.54779e-05	0.0118547	1.54944	0.46313	0.628825	0.165695	2	162932048	F	II	DPP4	TSS1500	shore	TSS1500-shore	chr2:162930233-162930879					rs79700168
cg23522915	0.10661	0.603228	5.44404	6.5986e-05	0.011911	1.54158	0.549923	0.656533	0.10661	12	48199277	R	II	HDAC7	Body	opensea	Body-opensea			TRUE
cg13619277	0.119639	0.630052	5.44364	6.60357e-05	0.0119134	1.54082	0.570233	0.689872	0.119639	15	33307322	R	II	FMN1	Body	opensea	Body-opensea			TRUE
cg08358964	0.10307	0.506894	5.44305	6.611e-05	0.0119134	1.53967	0.455359	0.558429	0.10307	16	11367783	F	II	PRM3	TSS1500	shelf	TSS1500-shelf	chr16:11369939-11370221		TRUE
cg01124477	0.319526	0.219014	5.44064	6.64119e-05	0.0119166	1.53504	0.0592515	0.378777	0.319526	2	181738271	F	II		IGR	opensea	IGR-opensea
cg25137314	0.145781	0.591441	5.43884	6.66379e-05	0.0119365	1.53159	0.51855	0.664332	0.145781	2	47452985	R	II		IGR	opensea	IGR-opensea		TRUE	TRUE
cg20164964	0.143935	0.609933	5.43818	6.67218e-05	0.0119465	1.53031	0.537965	0.6819	0.143935	12	3213850	R	II	TSPAN9	5'UTR	opensea	5'UTR-opensea			TRUE
cg20038219	0.179621	0.653093	5.4353	6.70854e-05	0.0119712	1.52479	0.563282	0.742904	0.179621	7	73241729	F	II		IGR	shelf	IGR-shelf	chr7:73245434-73246045
cg24728949	0.105327	0.603317	5.43491	6.71352e-05	0.0119712	1.52403	0.550653	0.65598	0.105327	5	106820169	F	II	EFNA5	Body	opensea	Body-opensea			TRUE
cg19778776	-0.143843	0.422758	-5.43466	6.71669e-05	0.0119712	1.52355	0.494679	0.350837	-0.143843	1	206807380	R	II	DYRK3	TSS1500	shore	TSS1500-shore	chr1:206808523-206809187		TRUE
cg10132010	0.201586	0.59505	5.43465	6.71688e-05	0.0119712	1.52352	0.494257	0.695843	0.201586	1	56724194	R	II		IGR	opensea	IGR-opensea			TRUE
cg00686159	0.141258	0.515585	5.43369	6.729e-05	0.0119712	1.52169	0.444957	0.586214	0.141258	13	74291284	F	II	KLF12	Body	opensea	Body-opensea			TRUE
cg18639228	0.113222	0.733342	5.43337	6.73315e-05	0.0119712	1.52106	0.676731	0.789953	0.113222	5	122232684	R	II	SNX24	Body	opensea	Body-opensea			TRUE
cg16600012	0.119295	0.752283	5.43332	6.73383e-05	0.0119712	1.52096	0.692635	0.811931	0.119295	11	28305997	F	II	METT5D1	Body	opensea	Body-opensea			TRUE		rs78003484
cg04928457	0.16869	0.637556	5.43254	6.74378e-05	0.0119753	1.51946	0.553211	0.721901	0.16869	4	186835866	R	II	SORBS2	5'UTR	opensea	5'UTR-opensea			TRUE
cg04839975	0.110264	0.715276	5.43168	6.75473e-05	0.0119753	1.51781	0.660144	0.770408	0.110264	3	193656618	R	II		IGR	opensea	IGR-opensea			TRUE
cg01935096	0.119289	0.800134	5.43082	6.7657e-05	0.0119832	1.51616	0.74049	0.859779	0.119289	11	70391215	F	I	SHANK2	Body	opensea	Body-opensea		TRUE	TRUE		rs7110358
cg22307974	0.116859	0.66247	5.42987	6.77783e-05	0.0119904	1.51434	0.60404	0.720899	0.116859	2	46768111	F	II		IGR	shore	IGR-shore	chr2:46769471-46769676		TRUE
cg00067720	-0.123698	0.635555	-5.42704	6.81431e-05	0.0120144	1.50889	0.697405	0.573706	-0.123698	5	67521141	R	II	PIK3R1	TSS1500	opensea	TSS1500-opensea			TRUE
cg08477158	-0.104524	0.337669	-5.42531	6.83664e-05	0.012026	1.50556	0.389931	0.285408	-0.104524	17	58807667	F	II	BCAS3	Body	opensea	Body-opensea			TRUE
cg03266297	0.123637	0.629453	5.42427	6.85013e-05	0.0120386	1.50356	0.567634	0.691272	0.123637	8	37641112	R	II		IGR	opensea	IGR-opensea			TRUE
cg02046017	0.148147	0.62912	5.42288	6.86822e-05	0.0120386	1.50088	0.555046	0.703194	0.148147	11	70707406	R	II	SHANK2	Body	opensea	Body-opensea			TRUE
cg24427660	-0.152533	0.46843	-5.42278	6.86953e-05	0.0120386	1.50068	0.544697	0.392164	-0.152533	11	818892	R	II	PNPLA2	TSS200	shore	TSS200-shore	chr11:818974-820271			low-CpG:808836-808964
cg03877829	0.160905	0.560208	5.42081	6.89515e-05	0.0120656	1.4969	0.479755	0.64066	0.160905	5	111190203	F	II	C5orf13	Body	opensea	Body-opensea			TRUE
cg00299105	0.107891	0.727058	5.42033	6.90143e-05	0.0120656	1.49597	0.673112	0.781003	0.107891	11	113243817	R	II		IGR	opensea	IGR-opensea			TRUE
cg04029483	0.100237	0.834226	5.42024	6.90258e-05	0.0120656	1.4958	0.784107	0.884344	0.100237	12	15943686	R	II	EPS8	TSS1500	shore	TSS1500-shore	chr12:15941718-15942740
cg23915792	-0.141303	0.170264	-5.42005	6.90506e-05	0.0120656	1.49544	0.240916	0.099613	-0.141303	22	41763255	R	II	TEF	TSS200	opensea	TSS200-opensea			TRUE
cg06223539	0.197209	0.424263	5.41877	6.92186e-05	0.01209	1.49297	0.325659	0.522868	0.197209	11	70517374	R	I	SHANK2	Body	opensea	Body-opensea			TRUE
cg03747456	-0.109131	0.120859	-5.41799	6.93211e-05	0.012098	1.49147	0.175424	0.0662932	-0.109131	12	52586127	F	II	KRT80	TSS1500	opensea	TSS1500-opensea		TRUE	TRUE
cg20494374	0.165076	0.625125	5.41505	6.97089e-05	0.0121425	1.4858	0.542587	0.707663	0.165076	6	27525678	R	I		IGR	opensea	IGR-opensea
cg13577778	0.102472	0.851729	5.41468	6.97567e-05	0.0121425	1.4851	0.800493	0.902965	0.102472	14	69481517	F	II		IGR	opensea	IGR-opensea			TRUE
cg27441486	0.216184	0.658475	5.41312	6.99636e-05	0.0121546	1.48209	0.550383	0.766567	0.216184	1	201708522	F	II	NAV1	TSS1500	shore	TSS1500-shore	chr1:201708787-201709429	TRUE
cg02276070	0.10415	0.730653	5.41247	7.00506e-05	0.0121546	1.48083	0.678578	0.782727	0.10415	5	149683066	F	II	ARSI	TSS1500	shore	TSS1500-shore	chr5:149681702-149682601
cg09554513	0.148206	0.853329	5.41168	7.01548e-05	0.0121626	1.47932	0.779226	0.927432	0.148206	3	118891711	R	II	UPK1B	TSS1500	opensea	TSS1500-opensea
cg06759309	0.103186	0.770042	5.41081	7.0271e-05	0.0121727	1.47763	0.718449	0.821635	0.103186	6	139699305	R	II		IGR	shelf	IGR-shelf	chr6:139694811-139696578
cg21416692	-0.108726	0.372266	-5.40791	7.06576e-05	0.0122045	1.47206	0.426629	0.317903	-0.108726	1	33803805	R	II	PHC2	5'UTR	opensea	5'UTR-opensea			TRUE
cg00916635	0.102707	0.758706	5.40755	7.07063e-05	0.0122079	1.47136	0.707353	0.81006	0.102707	1	114414312	F	II	PTPN22	5'UTR	opensea	5'UTR-opensea			TRUE		rs34778759
cg22727783	0.123075	0.588628	5.4064	7.08613e-05	0.0122156	1.46913	0.527091	0.650166	0.123075	5	14441074	R	II	TRIO	Body	opensea	Body-opensea		TRUE	TRUE			rs27116
cg15512528	0.139509	0.677788	5.4062	7.08883e-05	0.0122156	1.46875	0.608033	0.747542	0.139509	1	173869522	R	II		IGR	opensea	IGR-opensea			TRUE
cg05156137	-0.147507	0.352821	-5.40595	7.09212e-05	0.0122156	1.46827	0.426575	0.279067	-0.147507	21	35898975	R	II	RCAN1	5'UTR	opensea	5'UTR-opensea		TRUE	TRUE
cg03291548	0.122937	0.664137	5.40528	7.10113e-05	0.0122205	1.46698	0.602669	0.725606	0.122937	22	18266804	R	II		IGR	shore	IGR-shore	chr22:18267968-18268250
cg01623879	0.13485	0.769841	5.40459	7.11038e-05	0.0122214	1.46566	0.702416	0.837266	0.13485	13	107559229	R	II		IGR	opensea	IGR-opensea			TRUE
cg19818271	0.10095	0.650191	5.40292	7.13296e-05	0.0122552	1.46244	0.599716	0.700666	0.10095	7	77468418	F	II	PHTF2	TSS1500	opensea	TSS1500-opensea					rs17158641
cg24916358	-0.148324	0.481078	-5.40215	7.14345e-05	0.0122631	1.46095	0.555239	0.406916	-0.148324	10	126315761	F	II	FAM53B	Body	opensea	Body-opensea		TRUE	TRUE
cg24254937	0.144745	0.684895	5.40203	7.14503e-05	0.0122631	1.46072	0.612522	0.757267	0.144745	1	23858301	F	II	E2F2	TSS1500	shore	TSS1500-shore	chr1:23857033-23858089				rs3218121
cg08258403	0.154845	0.64494	5.39878	7.18924e-05	0.0122971	1.45445	0.567518	0.722363	0.154845	12	15378311	F	II		IGR	shelf	IGR-shelf	chr12:15373986-15374514
cg24406771	0.135748	0.694021	5.39469	7.24525e-05	0.0123566	1.44657	0.626147	0.761895	0.135748	1	229002047	F	II		IGR	opensea	IGR-opensea			TRUE
cg04546573	0.112568	0.59938	5.39435	7.24987e-05	0.0123566	1.44592	0.543096	0.655664	0.112568	2	189198567	R	II	GULP1	5'UTR	opensea	5'UTR-opensea			TRUE
cg14326644	0.180684	0.497725	5.39332	7.26405e-05	0.012361	1.44393	0.407383	0.588067	0.180684	2	29430352	F	II	ALK	Body	opensea	Body-opensea			TRUE
cg07568015	0.13078	0.799362	5.39327	7.26479e-05	0.012361	1.44383	0.733972	0.864752	0.13078	11	13367266	F	II	ARNTL	5'UTR	opensea	5'UTR-opensea			TRUE
cg26845430	-0.129973	0.395395	-5.39209	7.28106e-05	0.0123677	1.44156	0.460381	0.330408	-0.129973	10	72384603	F	II		IGR	opensea	IGR-opensea			TRUE
cg24155984	0.17804	0.743539	5.38776	7.34116e-05	0.0124102	1.4332	0.654519	0.832559	0.17804	5	66127678	F	II	MAST4	Body	opensea	Body-opensea			TRUE
cg00686132	0.136658	0.343383	5.38542	7.37392e-05	0.0124356	1.42868	0.275054	0.411711	0.136658	6	168257835	F	II	MLLT4	Body	opensea	Body-opensea			TRUE
cg04790887	0.121942	0.777544	5.38493	7.38079e-05	0.0124422	1.42773	0.716573	0.838515	0.121942	15	58515544	F	II		IGR	opensea	IGR-opensea			TRUE		rs36021695
cg11366668	0.164673	0.593194	5.38025	7.44656e-05	0.012498	1.41872	0.510858	0.67553	0.164673	8	691167	F	II		IGR	shore	IGR-shore	chr8:686830-689496					rs73673004
cg03803818	0.131473	0.559668	5.37608	7.50586e-05	0.0125725	1.41066	0.493931	0.625404	0.131473	12	110637414	R	II	IFT81	Body	opensea	Body-opensea			TRUE
cg27356296	0.105914	0.648566	5.37479	7.52433e-05	0.0125934	1.40816	0.595609	0.701523	0.105914	7	134565928	R	II	CALD1	Body	opensea	Body-opensea			TRUE
cg01872593	0.116396	0.427625	5.37204	7.56363e-05	0.0126242	1.40287	0.369427	0.485823	0.116396	14	54446260	R	II		IGR	opensea	IGR-opensea			TRUE
cg12894711	-0.106238	0.213428	-5.3711	7.57721e-05	0.0126242	1.40104	0.266548	0.160309	-0.106238	7	43821949	F	II	BLVRA	Body	opensea	Body-opensea			TRUE
cg07809831	-0.174816	0.705693	-5.37099	7.57877e-05	0.0126242	1.40083	0.793101	0.618285	-0.174816	16	48428016	F	I		IGR	opensea	IGR-opensea			TRUE		rs71382720	rs71382719
cg20640261	0.14899	0.518952	5.36998	7.59338e-05	0.0126377	1.39888	0.444457	0.593446	0.14899	6	31707019	R	II	MSH5	TSS1500	shore	TSS1500-shore	chr6:31707489-31708336
cg05663262	0.110805	0.69578	5.36956	7.59943e-05	0.0126377	1.39807	0.640378	0.751183	0.110805	1	43930279	R	II		IGR	opensea	IGR-opensea						rs79574796
cg02488129	0.107746	0.498913	5.36837	7.6166e-05	0.0126522	1.39578	0.44504	0.552786	0.107746	16	3058364	R	I		IGR	opensea	IGR-opensea
cg05880829	0.100898	0.60132	5.36664	7.64181e-05	0.0126632	1.39242	0.550871	0.651769	0.100898	6	138867080	R	II	NHSL1	Body	opensea	Body-opensea			TRUE	low-CpG:138908496-138908826
cg08890883	0.12929	0.664225	5.36626	7.6472e-05	0.0126632	1.3917	0.59958	0.728871	0.12929	19	6752577	R	II	SH2D3A	3'UTR	island	3'UTR-island	chr19:6752515-6753657	TRUE	TRUE
cg13439241	0.151113	0.565785	5.3662	7.64817e-05	0.0126632	1.39157	0.490228	0.641342	0.151113	11	63273507	R	II	LGALS12	TSS200	opensea	TSS200-opensea
cg19107469	0.106823	0.578	5.36447	7.6734e-05	0.0126814	1.38823	0.524589	0.631412	0.106823	20	55200445	F	II		IGR	island	IGR-island	chr20:55200279-55206789
cg02737219	-0.149395	0.724944	-5.36362	7.68572e-05	0.0126967	1.3866	0.799641	0.650246	-0.149395	7	41621468	R	II		IGR	opensea	IGR-opensea			TRUE
cg03127388	-0.177807	0.665064	-5.3629	7.69622e-05	0.0127042	1.38521	0.753967	0.576161	-0.177807	1	204195149	F	II	PLEKHA6	Body	opensea	Body-opensea		TRUE	TRUE
cg01422797	0.137216	0.60174	5.3584	7.76245e-05	0.0127785	1.3765	0.533132	0.670348	0.137216	6	100053305	R	II	PRDM13	TSS1500	shore	TSS1500-shore	chr6:100054686-100054988
cg05483534	0.135693	0.760791	5.35741	7.77707e-05	0.0127905	1.37459	0.692945	0.828638	0.135693	2	46802312	F	II	RHOQ	Body	opensea	Body-opensea			TRUE		rs17035301
cg25430192	0.106498	0.607229	5.35173	7.86157e-05	0.0128511	1.36361	0.553979	0.660478	0.106498	7	96643508	F	I	DLX6AS	TSS200	shelf	TSS200-shelf	chr7:96645786-96646599
cg12035325	0.125236	0.641288	5.34786	7.91971e-05	0.0128925	1.35613	0.57867	0.703906	0.125236	4	151287731	F	II	LRBA	Body	opensea	Body-opensea			TRUE			rs75787207
cg04160030	-0.146838	0.303681	-5.3464	7.94169e-05	0.0129118	1.35331	0.3771	0.230262	-0.146838	1	24195659	R	II	FUCA1	TSS1500	shore	TSS1500-shore	chr1:24194254-24194990
cg18924331	0.100143	0.757541	5.34457	7.96953e-05	0.0129307	1.34976	0.70747	0.807613	0.100143	14	105173681	F	II	INF2	Body	opensea	Body-opensea			TRUE	low-CpG:104244631-104245287
cg19471462	0.100643	0.646353	5.33933	8.04947e-05	0.0130067	1.33962	0.596031	0.696675	0.100643	X	39871053	R	I		IGR	shore	IGR-shore	chrX:39871532-39874766
cg26060536	0.105408	0.705429	5.33908	8.05322e-05	0.0130077	1.33914	0.652725	0.758133	0.105408	1	27559823	R	II	WDTC1	TSS1500	shore	TSS1500-shore	chr1:27560705-27561707					rs55922819
cg24996981	0.127292	0.627142	5.33574	8.10472e-05	0.0130723	1.33267	0.563495	0.690788	0.127292	11	69919990	F	I		IGR	opensea	IGR-opensea		TRUE	TRUE
cg12550344	0.116102	0.357211	5.3356	8.10679e-05	0.0130723	1.33241	0.299161	0.415262	0.116102	5	151076195	F	II		IGR	opensea	IGR-opensea		TRUE	TRUE
cg01052276	0.121318	0.757291	5.33537	8.11028e-05	0.0130723	1.33197	0.696632	0.81795	0.121318	2	97200489	R	II		IGR	shore	IGR-shore	chr2:97202313-97203787
cg00094595	0.109315	0.221045	5.33423	8.12804e-05	0.0130884	1.32975	0.166388	0.275703	0.109315	12	91775374	F	II		IGR	opensea	IGR-opensea			TRUE
cg00188321	-0.224998	0.725703	-5.33262	8.15293e-05	0.0131104	1.32664	0.838202	0.613204	-0.224998	6	33358615	F	II	KIFC1	TSS1500	shore	TSS1500-shore	chr6:33359097-33359975
cg19975645	0.141119	0.755839	5.33206	8.16175e-05	0.0131126	1.32554	0.68528	0.826399	0.141119	10	105806654	F	II	COL17A1	Body	opensea	Body-opensea			TRUE
cg08943361	-0.144392	0.32935	-5.33173	8.16685e-05	0.0131157	1.32491	0.401546	0.257154	-0.144392	16	56462172	F	II		IGR	shelf	IGR-shelf	chr16:56458735-56459748
cg01578293	0.125347	0.852875	5.33062	8.1841e-05	0.0131315	1.32277	0.790202	0.915549	0.125347	4	41400597	F	II	LIMCH1	Body	opensea	Body-opensea			TRUE		rs11947683
cg12486614	0.159707	0.640961	5.32971	8.19834e-05	0.0131315	1.321	0.561107	0.720814	0.159707	1	204340306	F	II	LOC127841	TSS1500	opensea	TSS1500-opensea						rs75351395
cg08824384	0.145989	0.334759	5.32784	8.22751e-05	0.0131497	1.31739	0.261764	0.407753	0.145989	6	143479386	F	II	AIG1	Body	opensea	Body-opensea			TRUE
cg17526890	0.104767	0.815589	5.32718	8.238e-05	0.0131497	1.3161	0.763206	0.867973	0.104767	2	96868790	R	II	STARD7	Body	opensea	Body-opensea			TRUE
cg16680237	0.194047	0.608722	5.3265	8.24856e-05	0.0131525	1.3148	0.511699	0.705745	0.194047	1	26484551	R	II	GRRP1	TSS1500	shelf	TSS1500-shelf	chr1:26487807-26488606
cg00657780	-0.115641	0.64749	-5.32279	8.3072e-05	0.0131901	1.3076	0.705311	0.58967	-0.115641	16	50285254	R	II		IGR	opensea	IGR-opensea		TRUE	TRUE	low-CpG:48842755-48842756
cg21474062	-0.15678	0.139061	-5.3215	8.3276e-05	0.0132133	1.30511	0.217451	0.0606714	-0.15678	3	141087363	R	II	ZBTB38	5'UTR	opensea	5'UTR-opensea		TRUE	TRUE	low-CpG:142569812-142570106
cg12009872	0.145207	0.552212	5.3183	8.37867e-05	0.0132586	1.2989	0.479609	0.624816	0.145207	15	51520739	R	II	CYP19A1	Body	opensea	Body-opensea		TRUE		low-CpG:49307849-49308066
cg19679543	0.105042	0.63193	5.31729	8.3948e-05	0.0132791	1.29695	0.579408	0.684451	0.105042	1	56394286	R	II		IGR	opensea	IGR-opensea			TRUE
cg12379383	0.167211	0.625307	5.31662	8.40545e-05	0.013282	1.29566	0.541701	0.708913	0.167211	15	96896940	F	I		IGR	island	IGR-island	chr15:96896928-96897301		TRUE
cg12485727	0.101384	0.783519	5.31641	8.40883e-05	0.013282	1.29525	0.732827	0.83421	0.101384	20	39762753	R	II		IGR	shelf	IGR-shelf	chr20:39765229-39766832
cg01604883	0.102212	0.38315	5.3134	8.4573e-05	0.013327	1.28941	0.332044	0.434256	0.102212	5	149674905	R	II		IGR	shelf	IGR-shelf	chr5:149676978-149677751	TRUE	TRUE
cg16004427	0.109511	0.455055	5.31204	8.47935e-05	0.0133426	1.28677	0.400299	0.50981	0.109511	1	16083101	R	II		IGR	shelf	IGR-shelf	chr1:16085147-16085862		TRUE
cg23978866	0.110592	0.589125	5.31024	8.50844e-05	0.0133625	1.28329	0.533829	0.644421	0.110592	2	47230407	R	II	TTC7A	Body	opensea	Body-opensea			TRUE
cg15684702	0.105399	0.721326	5.31023	8.50859e-05	0.0133625	1.28327	0.668626	0.774025	0.105399	1	45297445	F	I	PTCH2	Body	opensea	Body-opensea			TRUE
cg14162417	-0.137068	0.556017	-5.30924	8.52473e-05	0.0133625	1.28135	0.624551	0.487483	-0.137068	1	226315857	F	II		IGR	opensea	IGR-opensea		TRUE	TRUE
cg09958940	-0.108162	0.372664	-5.30766	8.55054e-05	0.0133881	1.27827	0.426745	0.318583	-0.108162	13	41108802	F	II		IGR	shore	IGR-shore	chr13:41109489-41109748
cg21889914	0.146904	0.606597	5.30632	8.57235e-05	0.0134137	1.27569	0.533145	0.680049	0.146904	15	85504254	R	II		IGR	opensea	IGR-opensea			TRUE
cg25614701	0.101414	0.595608	5.30478	8.59761e-05	0.0134166	1.2727	0.544901	0.646315	0.101414	17	38464730	R	II	RARA	TSS1500	opensea	TSS1500-opensea
cg21162938	0.121318	0.626431	5.30467	8.59945e-05	0.0134166	1.27248	0.565772	0.68709	0.121318	5	95115604	F	II	RHOBTB3	Body	opensea	Body-opensea			TRUE
cg02204618	-0.130826	0.459089	-5.30438	8.60425e-05	0.0134166	1.27191	0.524502	0.393676	-0.130826	2	36842633	R	II		IGR	opensea	IGR-opensea			TRUE
cg18127481	0.151076	0.740362	5.3004	8.66979e-05	0.0134462	1.26421	0.664824	0.8159	0.151076	5	49880645	R	II		IGR	opensea	IGR-opensea			TRUE
cg08274011	0.124849	0.600532	5.29927	8.68865e-05	0.0134605	1.262	0.538108	0.662957	0.124849	19	17138858	F	II	CPAMD8	TSS1500	opensea	TSS1500-opensea
cg26572392	0.125712	0.669058	5.29745	8.71892e-05	0.0134925	1.25847	0.606202	0.731914	0.125712	10	24496943	R	II	KIAA1217	5'UTR	opensea	5'UTR-opensea			TRUE
cg12568520	0.172971	0.672127	5.29626	8.73863e-05	0.0134982	1.25617	0.585642	0.758613	0.172971	5	66145546	R	II	MAST4	Body	opensea	Body-opensea			TRUE
cg13731800	0.253882	0.633344	5.29506	8.75866e-05	0.0135192	1.25385	0.506403	0.760285	0.253882	13	101167901	F	I	PCCA	Body	opensea	Body-opensea			TRUE		rs837285
cg22827833	0.178617	0.708945	5.2923	8.805e-05	0.0135708	1.24849	0.619637	0.798254	0.178617	11	13295841	R	II		IGR	shelf	IGR-shelf	chr11:13298796-13300735
cg11235015	-0.134337	0.253771	-5.29147	8.81894e-05	0.0135738	1.24688	0.32094	0.186603	-0.134337	6	148762393	F	II	SASH1	Body	opensea	Body-opensea		TRUE	TRUE
cg04381888	0.174644	0.420371	5.28983	8.84671e-05	0.0135903	1.24369	0.333049	0.507692	0.174644	12	48195549	R	II	HDAC7	Body	opensea	Body-opensea			TRUE
cg07250462	0.111437	0.678221	5.28875	8.86497e-05	0.013611	1.2416	0.622502	0.733939	0.111437	5	138853821	F	II		IGR	opensea	IGR-opensea			TRUE
cg12407685	0.110554	0.177089	5.28788	8.87972e-05	0.0136136	1.23991	0.121812	0.232365	0.110554	6	7165647	F	II	RREB1	5'UTR	opensea	5'UTR-opensea			TRUE
cg00203736	0.127495	0.816537	5.28497	8.92919e-05	0.013658	1.23427	0.752789	0.880285	0.127495	7	55022567	F	II		IGR	opensea	IGR-opensea			TRUE		rs75688291
cg01355757	-0.106047	0.700618	-5.28157	8.98757e-05	0.0137143	1.22765	0.753641	0.647595	-0.106047	2	74272773	R	II	TET3	TSS1500	opensea	TSS1500-opensea
cg02184673	0.133047	0.259516	5.28016	9.01178e-05	0.0137386	1.22492	0.192992	0.326039	0.133047	11	123066560	F	I	ASAM	TSS1500	island	TSS1500-island	chr11:123066517-123066986	TRUE
cg06465076	-0.208877	0.435127	-5.27765	9.0551e-05	0.0137647	1.22005	0.539565	0.330689	-0.208877	5	96027378	F	II	CAST	Body	opensea	Body-opensea			TRUE
cg19037539	0.202061	0.669152	5.27709	9.06483e-05	0.0137695	1.21895	0.568121	0.770182	0.202061	5	107011761	F	II		IGR	shelf	IGR-shelf	chr5:107005130-107008191
cg03461110	0.134624	0.264434	5.27619	9.08051e-05	0.0137718	1.2172	0.197122	0.331746	0.134624	7	4778881	F	II	FOXK1	Body	opensea	Body-opensea		TRUE	TRUE		rs79101635
cg05214511	0.10059	0.790011	5.27586	9.08627e-05	0.0137718	1.21656	0.739716	0.840306	0.10059	4	80572259	R	II		IGR	opensea	IGR-opensea			TRUE
cg10864979	0.110997	0.489119	5.27581	9.08713e-05	0.0137718	1.21646	0.433621	0.544618	0.110997	8	128879141	R	II	PVT1	Body	opensea	Body-opensea			TRUE
cg22932427	0.118092	0.682214	5.27344	9.12837e-05	0.0137756	1.21186	0.623168	0.74126	0.118092	1	155615664	F	II		IGR	opensea	IGR-opensea			TRUE
cg07641807	0.16113	0.150817	5.27241	9.14635e-05	0.0137888	1.20986	0.0702522	0.231383	0.16113	13	92001959	F	II	MIR19A	TSS1500	shore	TSS1500-shore	chr13:91999541-92001441
cg02274366	-0.106536	0.606708	-5.27185	9.15623e-05	0.0137889	1.20877	0.659976	0.55344	-0.106536	6	123154275	R	II		IGR	opensea	IGR-opensea			TRUE
cg19881992	0.114198	0.493001	5.27117	9.16802e-05	0.0138017	1.20746	0.435902	0.550099	0.114198	2	216491679	F	II		IGR	opensea	IGR-opensea			TRUE		rs1898730
cg10973934	0.114623	0.749423	5.26676	9.24589e-05	0.0138545	1.19887	0.692112	0.806735	0.114623	10	21787596	R	II	C10orf114	TSS1500	shore	TSS1500-shore	chr10:21788633-21789588
cg10010182	0.110732	0.769705	5.2649	9.27884e-05	0.013889	1.19526	0.714339	0.825071	0.110732	8	141641939	F	II	EIF2C2	Body	shelf	Body-shelf	chr8:141644429-141645598	TRUE
cg13354241	0.107199	0.702265	5.25982	9.3695e-05	0.0139602	1.18539	0.648665	0.755864	0.107199	2	64447091	R	II		IGR	opensea	IGR-opensea			TRUE
cg21708058	-0.141359	0.636574	-5.25701	9.42009e-05	0.0139995	1.17992	0.707254	0.565894	-0.141359	8	38585602	F	II	TACC1	TSS200	opensea	TSS200-opensea			TRUE		rs28364583
cg07077735	0.16214	0.340815	5.25519	9.45289e-05	0.014015	1.17639	0.259745	0.421885	0.16214	16	70494709	R	II	FUK	5'UTR	opensea	5'UTR-opensea			TRUE
cg24529782	0.13268	0.426246	5.25361	9.48167e-05	0.0140428	1.1733	0.359906	0.492586	0.13268	X	39875584	F	II		IGR	shore	IGR-shore	chrX:39871532-39874766
cg18993113	0.101996	0.276576	5.24996	9.54807e-05	0.0140965	1.16622	0.225578	0.327574	0.101996	11	9944707	R	II	SBF2	Body	opensea	Body-opensea			TRUE
cg17837526	-0.109587	0.161908	-5.24965	9.55374e-05	0.0140967	1.16561	0.216701	0.107115	-0.109587	5	172410489	F	II	ATP6V0E1	TSS1500	shore	TSS1500-shore	chr5:172410691-172411161				rs6895379
cg24017800	0.172423	0.318857	5.24457	9.64721e-05	0.014195	1.15573	0.232646	0.405069	0.172423	17	14276682	R	II		IGR	opensea	IGR-opensea			TRUE			rs73979338
cg05643453	0.153551	0.67271	5.24337	9.66945e-05	0.014195	1.15339	0.595934	0.749486	0.153551	1	160159453	F	II	CASQ1	TSS1500	opensea	TSS1500-opensea
cg21514857	0.120517	0.738087	5.24325	9.67172e-05	0.014195	1.15315	0.677828	0.798346	0.120517	8	52721802	R	II	PXDNL	1stExon	opensea	1stExon-opensea			TRUE
cg08365687	0.143033	0.485717	5.24322	9.67223e-05	0.014195	1.1531	0.414201	0.557234	0.143033	3	52569147	F	II	NT5DC2	TSS200	shore	TSS200-shore	chr3:52570475-52570842
cg22823122	0.108214	0.759279	5.24317	9.67315e-05	0.014195	1.153	0.705172	0.813385	0.108214	4	170034076	F	II	SH3RF1	Body	opensea	Body-opensea			TRUE
cg12126344	0.13072	0.473624	5.24305	9.67552e-05	0.014195	1.15275	0.408264	0.538983	0.13072	1	12207564	F	I		IGR	opensea	IGR-opensea			TRUE
cg08302480	0.110976	0.594609	5.24173	9.69992e-05	0.0142258	1.1502	0.53912	0.650097	0.110976	19	54369133	R	II	MYADM	TSS1500	shore	TSS1500-shore	chr19:54369387-54369809
cg18662507	0.122771	0.775119	5.24043	9.72425e-05	0.0142472	1.14765	0.713733	0.836504	0.122771	2	175163052	R	II		IGR	opensea	IGR-opensea			TRUE
cg25283465	0.151304	0.428708	5.23968	9.73819e-05	0.0142472	1.1462	0.353056	0.50436	0.151304	1	111323341	F	I		IGR	island	IGR-island	chr1:111323223-111323433				rs527288
cg23450481	-0.111668	0.472028	-5.23827	9.76461e-05	0.0142652	1.14345	0.527862	0.416194	-0.111668	19	46586221	R	II		IGR	shelf	IGR-shelf	chr19:46582045-46582444					rs76377294
cg25105745	0.121997	0.331941	5.23822	9.76552e-05	0.0142652	1.14335	0.270943	0.39294	0.121997	1	110141275	F	II	MIR197	TSS1500	opensea	TSS1500-opensea
cg02235918	-0.120467	0.205443	-5.23446	9.83611e-05	0.0143307	1.13604	0.265677	0.14521	-0.120467	6	72043561	R	II		IGR	opensea	IGR-opensea			TRUE
cg17728974	0.101872	0.474406	5.23312	9.86154e-05	0.0143627	1.13342	0.42347	0.525342	0.101872	6	105403577	F	II	LIN28B	TSS1500	shelf	TSS1500-shelf	chr6:105400877-105401149
cg15414132	-0.162216	0.683914	-5.23243	9.87456e-05	0.0143717	1.13208	0.765022	0.602806	-0.162216	11	65150358	R	II	SLC25A45	TSS1500	shelf	TSS1500-shelf	chr11:65153726-65154606	TRUE	TRUE
cg01698392	0.102011	0.820927	5.226	9.99711e-05	0.0144551	1.11956	0.769922	0.871932	0.102011	17	76871734	R	II	TIMP2	Body	opensea	Body-opensea			TRUE
cg26212328	0.139794	0.464608	5.22504	0.000100156	0.014468	1.11768	0.394711	0.534505	0.139794	12	46767665	F	I	SLC38A2	TSS1500	shore	TSS1500-shore	chr12:46765134-46766633				rs76909391
cg17392201	-0.118732	0.395467	-5.22464	0.000100233	0.014468	1.11691	0.454833	0.336101	-0.118732	19	54173935	F	II	MIR1323	TSS1500	opensea	TSS1500-opensea					rs7259011
cg19433694	0.137144	0.692741	5.2229	0.000100568	0.0144916	1.11352	0.624169	0.761313	0.137144	5	35146528	R	II	PRLR	5'UTR	opensea	5'UTR-opensea			TRUE
cg08588180	-0.166438	0.362342	-5.22043	0.000101046	0.0145153	1.1087	0.445561	0.279123	-0.166438	6	25138905	R	II	CMAH	TSS1500	shore	TSS1500-shore	chr6:25139920-25140246	TRUE
cg22522961	0.151135	0.822624	5.21855	0.00010141	0.0145405	1.10505	0.747057	0.898192	0.151135	1	68288817	F	II	GNG12	5'UTR	opensea	5'UTR-opensea			TRUE
cg23508201	-0.164169	0.404982	-5.21843	0.000101434	0.0145405	1.10481	0.487066	0.322897	-0.164169	17	38677884	F	II		IGR	opensea	IGR-opensea		TRUE	TRUE		rs76286084
cg17941330	0.104247	0.552233	5.21727	0.000101661	0.0145593	1.10254	0.500109	0.604356	0.104247	1	147245494	R	II	GJA5	TSS200	opensea	TSS200-opensea			TRUE
cg17240987	0.10932	0.389685	5.21566	0.000101975	0.0145814	1.09941	0.335026	0.444345	0.10932	20	44421576	R	II	WFDC3	TSS1500	shore	TSS1500-shore	chr20:44420497-44420868
cg05054998	-0.172217	0.511505	-5.21524	0.000102057	0.0145814	1.09859	0.597614	0.425396	-0.172217	21	46378625	F	I	C21orf70	Body	island	Body-island	chr21:46378278-46378645	TRUE	TRUE
cg05888894	0.172622	0.52175	5.21459	0.000102186	0.0145898	1.09731	0.435439	0.60806	0.172622	8	119107030	R	II	EXT1	Body	opensea	Body-opensea			TRUE
cg05564266	0.127891	0.388763	5.21431	0.00010224	0.0145923	1.09677	0.324817	0.452708	0.127891	6	118973597	F	II	C6orf204	TSS1500	shore	TSS1500-shore	chr6:118971662-118973137
cg07156336	0.122968	0.467275	5.21406	0.000102289	0.0145923	1.09628	0.405792	0.528759	0.122968	3	128501650	F	II	RAB7A	5'UTR	opensea	5'UTR-opensea			TRUE
cg00579036	-0.126667	0.349535	-5.20998	0.000103094	0.0146697	1.08833	0.412868	0.286202	-0.126667	6	25138551	R	II	CMAH	TSS1500	shore	TSS1500-shore	chr6:25139920-25140246	TRUE	TRUE
cg09750084	0.124264	0.582291	5.20871	0.000103347	0.0146908	1.08585	0.520158	0.644423	0.124264	13	49005868	R	II	LPAR6	5'UTR	opensea	5'UTR-opensea			TRUE
cg02973416	-0.133568	0.287724	-5.20649	0.000103789	0.0147138	1.08152	0.354508	0.22094	-0.133568	11	796069	F	II	SLC25A22	5'UTR	shore	5'UTR-shore	chr11:797640-798544		TRUE
cg25798605	0.104018	0.786256	5.20585	0.000103915	0.0147169	1.08028	0.734247	0.838265	0.104018	19	41868887	R	II	TMEM91	TSS1500	shore	TSS1500-shore	chr19:41869673-41870133
cg12974138	0.116587	0.57338	5.20536	0.000104013	0.0147232	1.07932	0.515087	0.631674	0.116587	11	59325950	F	I		IGR	shelf	IGR-shelf	chr11:59328137-59328507
cg13782932	0.122842	0.620727	5.20417	0.000104253	0.0147487	1.07699	0.559306	0.682148	0.122842	11	118662891	F	II	DDX6	TSS1500	island	TSS1500-island	chr11:118661305-118663026
cg02470080	0.144665	0.659743	5.20302	0.000104482	0.0147579	1.07475	0.58741	0.732075	0.144665	8	118849022	F	II	EXT1	Body	opensea	Body-opensea			TRUE
cg22747380	0.140587	0.667079	5.2027	0.000104546	0.0147579	1.07414	0.596785	0.737372	0.140587	8	118993090	F	II	EXT1	Body	opensea	Body-opensea			TRUE		rs62520079
cg17153138	-0.129933	0.214305	-5.1996	0.000105173	0.0148195	1.06807	0.279271	0.149338	-0.129933	6	130005350	F	II	ARHGAP18	Body	opensea	Body-opensea		TRUE
cg19942459	0.117031	0.671276	5.19895	0.000105303	0.0148197	1.06681	0.612761	0.729791	0.117031	11	70508110	R	II	SHANK2	Body	shore	Body-shore	chr11:70508328-70508617	TRUE	TRUE
cg14302625	-0.143022	0.58964	-5.19791	0.000105514	0.0148335	1.06478	0.661151	0.518129	-0.143022	2	235908503	F	II	SH3BP4	5'UTR	opensea	5'UTR-opensea			TRUE
cg02731366	0.13077	0.679214	5.19176	0.000106769	0.0149322	1.05277	0.613829	0.744599	0.13077	18	45568503	F	II	ZBTB7C	TSS1500	opensea	TSS1500-opensea
cg26122129	0.119999	0.743001	5.19072	0.000106984	0.0149502	1.05074	0.683002	0.803001	0.119999	8	30241119	R	II	RBPMS	TSS1500	shore	TSS1500-shore	chr8:30241416-30242878
cg08809405	0.1617	0.800654	5.19016	0.000107099	0.0149614	1.04964	0.719805	0.881504	0.1617	16	5967334	R	II		IGR	opensea	IGR-opensea			TRUE
cg19722706	0.111592	0.783991	5.18955	0.000107224	0.014962	1.04846	0.728195	0.839787	0.111592	15	83732977	R	II	BTBD1	Body	shelf	Body-shelf	chr15:83735240-83736089		TRUE
cg21245718	0.108097	0.655818	5.18835	0.000107471	0.0149741	1.04612	0.601769	0.709866	0.108097	9	93943683	R	II		IGR	opensea	IGR-opensea			TRUE
cg03224396	0.1348	0.599872	5.18791	0.000107564	0.0149741	1.04525	0.532472	0.667272	0.1348	1	221017300	F	II		IGR	opensea	IGR-opensea			TRUE		rs75670844
cg01330316	0.151686	0.438849	5.18777	0.000107592	0.0149741	1.04499	0.363006	0.514692	0.151686	6	45914282	F	II	CLIC5	Body	opensea	Body-opensea			TRUE
cg16578568	0.112688	0.672299	5.18718	0.000107715	0.0149814	1.04382	0.615955	0.728642	0.112688	16	29757405	F	II	C16orf54	TSS200	opensea	TSS200-opensea
cg02919090	0.117869	0.425938	5.18705	0.000107741	0.0149814	1.04358	0.367003	0.484872	0.117869	15	64263738	R	II	DAPK2	Body	opensea	Body-opensea			TRUE
cg25994871	0.126749	0.783727	5.18686	0.000107781	0.014982	1.0432	0.720353	0.847101	0.126749	7	107967614	F	II	NRCAM	5'UTR	opensea	5'UTR-opensea			TRUE
cg00028515	0.105176	0.588625	5.18197	0.0001088	0.015074	1.03365	0.536037	0.641213	0.105176	3	187548756	F	II		IGR	opensea	IGR-opensea			TRUE
cg13537646	0.1535	0.437274	5.18086	0.000109034	0.0150913	1.03148	0.360524	0.514024	0.1535	3	112143970	F	II		IGR	opensea	IGR-opensea			TRUE
cg25575937	0.104297	0.79874	5.18059	0.000109089	0.015094	1.03096	0.746591	0.850889	0.104297	3	48414383	F	II	FBXW12	Body	opensea	Body-opensea			TRUE
cg24223942	-0.132049	0.411497	-5.18005	0.000109203	0.0150998	1.0299	0.477521	0.345472	-0.132049	17	29152934	F	II	CRLF3	TSS1500	shore	TSS1500-shore	chr17:29151481-29151901
cg11042505	0.124511	0.418232	5.17969	0.000109278	0.0151003	1.0292	0.355977	0.480487	0.124511	2	15950244	F	II		IGR	opensea	IGR-opensea			TRUE
cg23548201	0.131415	0.560383	5.17623	0.000110009	0.0151431	1.02244	0.494676	0.62609	0.131415	3	195623792	F	II	TNK2	TSS1500	shore	TSS1500-shore	chr3:195622187-195623033
cg21490635	0.155879	0.599868	5.17312	0.000110671	0.0151598	1.01635	0.521928	0.677807	0.155879	12	13349273	F	II	EMP1	TSS1500	opensea	TSS1500-opensea		TRUE
cg01653532	0.139784	0.57085	5.17173	0.000110967	0.0151715	1.01363	0.500958	0.640742	0.139784	17	57444078	F	II	YPEL2	Body	opensea	Body-opensea			TRUE
cg18032164	0.135833	0.415779	5.17141	0.000111034	0.0151715	1.01302	0.347863	0.483696	0.135833	3	129024676	F	II		IGR	opensea	IGR-opensea		TRUE			rs71720329
cg07627317	0.133788	0.644676	5.17131	0.000111055	0.0151715	1.01283	0.577782	0.71157	0.133788	3	61517101	F	II		IGR	opensea	IGR-opensea			TRUE
cg05182265	0.12823	0.526361	5.17065	0.000111198	0.0151748	1.01153	0.462246	0.590476	0.12823	7	156933206	F	II	UBE3C	Body	shore	Body-shore	chr7:156931422-156932075		TRUE
cg01511828	0.128179	0.62388	5.1705	0.000111229	0.0151748	1.01124	0.55979	0.687969	0.128179	18	57365520	R	II	CCBE1	TSS1500	shore	TSS1500-shore	chr18:57363714-57365001
cg11619602	0.166485	0.653378	5.16975	0.000111391	0.0151828	1.00977	0.570136	0.736621	0.166485	11	13360707	R	II	ARNTL	5'UTR	opensea	5'UTR-opensea		TRUE	TRUE
cg09976845	-0.100648	0.49759	-5.16807	0.000111752	0.0152121	1.00648	0.547914	0.447266	-0.100648	17	60212030	F	II		IGR	shelf	IGR-shelf	chr17:60214775-60216785
cg17748645	0.137883	0.743057	5.16715	0.00011195	0.0152196	1.00469	0.674115	0.811998	0.137883	6	39269903	R	II	KCNK17	Body	shore	Body-shore	chr6:39271516-39271758		TRUE		rs57240761
cg17810360	0.1121	0.797656	5.16602	0.000112195	0.0152261	1.00247	0.741606	0.853706	0.1121	3	87170332	R	II		IGR	opensea	IGR-opensea			TRUE
cg04317047	0.109604	0.480143	5.16574	0.000112255	0.0152261	1.00192	0.425341	0.534945	0.109604	5	148808388	R	II	MIR143	TSS200	opensea	TSS200-opensea
cg10281340	0.14037	0.537933	5.1635	0.000112741	0.0152679	0.997543	0.467748	0.608118	0.14037	10	8744491	R	II		IGR	opensea	IGR-opensea			TRUE
cg21887193	0.128907	0.347126	5.16186	0.000113097	0.0153059	0.994339	0.282672	0.411579	0.128907	7	150786082	F	I	AGAP3	Body	shore	Body-shore	chr7:150783480-150785040	TRUE	TRUE
cg07069759	0.104923	0.632396	5.15951	0.00011361	0.0153313	0.989752	0.579934	0.684857	0.104923	10	47134171	R	II	LOC728643	TSS1500	opensea	TSS1500-opensea
cg26366091	-0.139438	0.475892	-5.15876	0.000113776	0.0153439	0.988271	0.545611	0.406173	-0.139438	1	111770274	R	II	CHI3L2	TSS200	opensea	TSS200-opensea
cg25771113	-0.112656	0.328506	-5.15803	0.000113936	0.0153569	0.986845	0.384834	0.272178	-0.112656	3	30140788	F	II		IGR	opensea	IGR-opensea			TRUE		rs12486900
cg17965712	0.121312	0.236515	5.1568	0.000114205	0.0153776	0.98445	0.175859	0.297171	0.121312	5	2757802	R	II		IGR	shore	IGR-shore	chr5:2748368-2757024
cg04797496	0.155789	0.587299	5.1542	0.000114779	0.0153987	0.979362	0.509405	0.665194	0.155789	5	141339086	F	II	PCDH12	TSS1500	opensea	TSS1500-opensea			TRUE
cg06109876	0.168268	0.819035	5.15197	0.000115273	0.0154419	0.975003	0.734901	0.903169	0.168268	8	124544878	R	II	FBXO32	TSS1500	opensea	TSS1500-opensea
cg24176288	0.13874	0.588913	5.15169	0.000115336	0.0154444	0.974446	0.519543	0.658283	0.13874	12	2221304	R	I	CACNA1C	Body	shelf	Body-shelf	chr12:2224409-2224645		TRUE
cg01314044	0.171184	0.500493	5.14735	0.000116306	0.0155111	0.965952	0.414901	0.586085	0.171184	11	94246036	F	II		IGR	shore	IGR-shore	chr11:94245546-94245891		TRUE
cg10899388	0.150133	0.754129	5.14501	0.000116833	0.0155666	0.961365	0.679062	0.829195	0.150133	3	32429908	F	II		IGR	shelf	IGR-shelf	chr3:32433104-32434162
cg26267890	0.10445	0.829006	5.14441	0.000116967	0.0155698	0.9602	0.776781	0.881231	0.10445	1	96420019	F	II		IGR	opensea	IGR-opensea			TRUE
cg10005998	0.144675	0.669356	5.1433	0.000117219	0.0155909	0.958018	0.597019	0.741693	0.144675	10	101754325	R	II	DNMBP	5'UTR	opensea	5'UTR-opensea		TRUE	TRUE
cg23599026	0.11423	0.298911	5.14272	0.000117349	0.0155909	0.956892	0.241797	0.356026	0.11423	10	102268546	R	II	SEC31B	Body	opensea	Body-opensea		TRUE
cg13392885	-0.136139	0.504404	-5.1422	0.000117468	0.0155975	0.955866	0.572473	0.436334	-0.136139	2	161593271	F	II		IGR	opensea	IGR-opensea			TRUE
cg26577320	-0.156734	0.387572	-5.14178	0.000117564	0.0156018	0.955039	0.465939	0.309205	-0.156734	1	15272326	F	II	KIAA1026	TSS200	opensea	TSS200-opensea		TRUE	TRUE		rs79727227
cg26289665	0.18474	0.677473	5.14011	0.000117941	0.0156252	0.951785	0.585103	0.769843	0.18474	21	30547239	F	II	C21orf7	3'UTR	opensea	3'UTR-opensea			TRUE
cg21764708	-0.167047	0.798963	-5.13881	0.000118237	0.0156546	0.949241	0.882486	0.715439	-0.167047	7	151493629	R	II	PRKAG2	5'UTR	opensea	5'UTR-opensea		TRUE	TRUE
cg05040725	0.114605	0.802973	5.13313	0.000119542	0.0157208	0.938106	0.745671	0.860275	0.114605	4	184242831	F	II	CLDN22	TSS1500	opensea	TSS1500-opensea			TRUE
cg26872045	-0.173797	0.310755	-5.13186	0.000119835	0.0157284	0.935624	0.397654	0.223857	-0.173797	5	127909589	F	II		IGR	opensea	IGR-opensea			TRUE
cg22246785	0.140454	0.306763	5.13182	0.000119844	0.0157284	0.935548	0.236536	0.37699	0.140454	12	122021013	R	II		IGR	shelf	IGR-shelf	chr12:122016170-122017693
cg12149609	-0.109276	0.2712	-5.13077	0.000120089	0.0157408	0.933473	0.325838	0.216562	-0.109276	20	42816600	R	I	JPH2	TSS1500	opensea	TSS1500-opensea		TRUE	TRUE
cg26954156	0.115689	0.325691	5.13062	0.000120123	0.0157408	0.933188	0.267846	0.383535	0.115689	1	22138642	F	II	LDLRAD2	TSS200	shelf	TSS200-shelf	chr1:22140891-22141407
cg22679940	-0.154129	0.153468	-5.13046	0.000120161	0.0157408	0.932868	0.230533	0.0764036	-0.154129	10	71097650	F	II	HK1	Body	opensea	Body-opensea		TRUE	TRUE		rs74334712
cg14836522	0.100615	0.7673	5.12688	0.000120993	0.015776	0.925866	0.716992	0.817608	0.100615	1	31375133	F	I	SDC3	Body	opensea	Body-opensea			TRUE
cg07285167	-0.120644	0.444413	-5.12688	0.000120994	0.015776	0.925857	0.504735	0.384091	-0.120644	1	36948981	F	II	CSF3R	TSS1500	opensea	TSS1500-opensea					rs76171015
cg21622977	0.154688	0.645715	5.12673	0.00012103	0.015776	0.925558	0.568371	0.723059	0.154688	8	30240920	F	II	RBPMS	TSS1500	shore	TSS1500-shore	chr8:30241416-30242878
cg07215822	0.100172	0.854681	5.12559	0.000121296	0.0157766	0.923326	0.804595	0.904767	0.100172	6	158701037	R	I		IGR	opensea	IGR-opensea						rs9356560
cg27582563	-0.108932	0.480604	-5.12453	0.000121545	0.0157896	0.921253	0.535071	0.426138	-0.108932	2	20384285	R	II		IGR	opensea	IGR-opensea		TRUE	TRUE
cg10597661	0.132452	0.729694	5.12374	0.00012173	0.015794	0.919705	0.663468	0.79592	0.132452	8	8256332	F	II		IGR	opensea	IGR-opensea			TRUE
cg07229767	0.141562	0.663285	5.12157	0.000122241	0.0158244	0.915457	0.592505	0.734066	0.141562	4	3372206	R	II	RGS12	Body	shelf	Body-shelf	chr4:3374733-3374998	TRUE	TRUE
cg14385738	0.110039	0.547836	5.11972	0.000122679	0.0158438	0.911824	0.492816	0.602856	0.110039	1	114414340	R	II	PTPN22	5'UTR	opensea	5'UTR-opensea			TRUE
cg25410668	0.116414	0.349586	5.11818	0.000123046	0.0158528	0.908797	0.291379	0.407793	0.116414	1	28241577	R	II	RPA2	TSS1500	shore	TSS1500-shore	chr1:28240584-28241535
cg08264338	0.168458	0.672462	5.118	0.000123088	0.0158528	0.90845	0.588233	0.756691	0.168458	5	143303200	R	II		IGR	opensea	IGR-opensea			TRUE
cg03478448	-0.119614	0.182522	-5.1176	0.000123183	0.015854	0.907665	0.242328	0.122715	-0.119614	16	56945735	F	II	SLC12A3	Body	opensea	Body-opensea			TRUE		rs955512
cg08223760	0.11178	0.581588	5.11715	0.00012329	0.015854	0.906787	0.525697	0.637478	0.11178	1	43291209	R	II	ERMAP	TSS200	opensea	TSS200-opensea
cg27135113	0.106836	0.58561	5.11073	0.00012483	0.0159745	0.894196	0.532192	0.639028	0.106836	11	12307450	F	II	MICALCL	TSS1500	opensea	TSS1500-opensea					rs35359499
cg18065599	-0.144508	0.661086	-5.11033	0.000124927	0.015978	0.893404	0.73334	0.588832	-0.144508	11	47968995	R	II		IGR	opensea	IGR-opensea		TRUE	TRUE
cg10156493	-0.225003	0.524703	-5.10726	0.000125671	0.0160185	0.887381	0.637205	0.412202	-0.225003	6	124857134	R	II	NKAIN2	Body	opensea	Body-opensea			TRUE
cg20155035	0.100799	0.685328	5.10604	0.000125968	0.0160256	0.88499	0.634929	0.735728	0.100799	1	235091106	R	II		IGR	opensea	IGR-opensea
cg26591930	0.181473	0.645854	5.10385	0.000126503	0.0160616	0.880687	0.555118	0.736591	0.181473	11	70672986	R	I	SHANK2	Body	island	Body-island	chr11:70672834-70673055	TRUE		low-CpG:70350361-70350918
cg09106999	-0.126404	0.344495	-5.09892	0.000127716	0.0161716	0.871012	0.407697	0.281292	-0.126404	12	56360065	R	II	CDK2	TSS1500	shore	TSS1500-shore	chr12:56360467-56360909
cg22065894	0.153716	0.535535	5.09874	0.000127758	0.0161721	0.870675	0.458677	0.612393	0.153716	6	28715027	F	II		IGR	opensea	IGR-opensea
cg17307989	0.194211	0.740847	5.09858	0.000127799	0.0161721	0.870349	0.643741	0.837952	0.194211	14	72886943	R	II	RGS6	Body	opensea	Body-opensea			TRUE
cg09757859	0.124803	0.60758	5.09742	0.000128086	0.016181	0.868077	0.545178	0.669982	0.124803	4	119948505	F	II	SYNPO2	Body	opensea	Body-opensea			TRUE	low-CpG:120167721-120168019
cg09025210	-0.116601	0.67531	-5.0968	0.000128241	0.0161894	0.866849	0.733611	0.617009	-0.116601	3	141132146	F	II	ZBTB38	5'UTR	opensea	5'UTR-opensea			TRUE
cg02344497	-0.129853	0.522624	-5.09521	0.000128636	0.0162198	0.86373	0.58755	0.457697	-0.129853	3	27472828	R	II	SLC4A7	Body	opensea	Body-opensea		TRUE	TRUE
cg03045014	0.125868	0.561184	5.09469	0.000128765	0.0162312	0.862715	0.49825	0.624118	0.125868	17	30673064	F	II		IGR	shelf	IGR-shelf	chr17:30677001-30677460
cg08473752	0.170101	0.42304	5.09407	0.00012892	0.0162313	0.861495	0.337989	0.50809	0.170101	17	26517057	F	II	NLK	Body	opensea	Body-opensea			TRUE
cg17733447	0.142378	0.439499	5.09371	0.00012901	0.0162377	0.860788	0.36831	0.510688	0.142378	17	45929399	F	I	SP6	5'UTR	shore	5'UTR-shore	chr17:45928211-45928710		TRUE
cg20567355	0.110117	0.756131	5.0927	0.000129262	0.01625	0.858808	0.701073	0.81119	0.110117	8	52754434	R	II	PCMTD1	Body	opensea	Body-opensea			TRUE
cg07870074	0.109647	0.681767	5.09171	0.00012951	0.0162618	0.85686	0.626944	0.736591	0.109647	10	706006	F	II	DIP2C	Body	opensea	Body-opensea		TRUE	TRUE
cg17450505	-0.137812	0.57907	-5.08991	0.000129963	0.0162696	0.853324	0.647976	0.510164	-0.137812	6	2515297	R	II		IGR	opensea	IGR-opensea
cg10702457	0.217077	0.722134	5.08929	0.000130117	0.01627	0.85212	0.613595	0.830673	0.217077	4	88753179	R	II	MEPE	TSS1500	opensea	TSS1500-opensea
cg18598146	0.171734	0.237632	5.0882	0.000130393	0.0162852	0.849972	0.151765	0.3235	0.171734	20	47896448	R	II	SNORD12B	TSS1500	shore	TSS1500-shore	chr20:47894197-47895199
cg05945869	0.181667	0.731106	5.08796	0.000130454	0.0162867	0.849493	0.640272	0.821939	0.181667	4	95459114	F	II	PDLIM5	Body	opensea	Body-opensea			TRUE
cg25304198	0.143813	0.697797	5.08721	0.000130642	0.0162867	0.848034	0.625891	0.769704	0.143813	13	51168711	R	II		IGR	opensea	IGR-opensea			TRUE
cg17432627	0.130415	0.801247	5.08682	0.000130741	0.0162867	0.847267	0.736039	0.866454	0.130415	21	40124277	R	II	NCRNA00114	TSS200	opensea	TSS200-opensea
cg10962524	0.174684	0.559513	5.0865	0.000130823	0.0162904	0.846633	0.472171	0.646855	0.174684	5	83017009	F	II	HAPLN1	TSS200	shore	TSS200-shore	chr5:83017894-83018358
cg01407477	0.101787	0.68136	5.08593	0.000130968	0.016297	0.845508	0.630467	0.732254	0.101787	8	99951151	F	II		IGR	shore	IGR-shore	chr8:99952020-99954686		TRUE		rs12678296
cg18752527	-0.116425	0.633069	-5.08502	0.000131198	0.0163131	0.843729	0.691281	0.574856	-0.116425	2	197132869	R	II	HECW2	Body	opensea	Body-opensea			TRUE
cg18178715	0.10658	0.215873	5.08382	0.000131505	0.0163421	0.84136	0.162583	0.269163	0.10658	1	43795999	F	II		IGR	opensea	IGR-opensea		TRUE	TRUE
cg17311865	0.104853	0.762151	5.08188	0.000132	0.0163837	0.837549	0.709725	0.814578	0.104853	14	22975521	R	I		IGR	opensea	IGR-opensea
cg00712289	0.108596	0.815803	5.08172	0.000132039	0.0163838	0.837249	0.761505	0.870101	0.108596	14	81130611	F	II	C14orf145	Body	opensea	Body-opensea			TRUE
cg19684151	0.186952	0.732418	5.07886	0.000132773	0.0164167	0.831627	0.638941	0.825894	0.186952	5	107145058	R	II		IGR	opensea	IGR-opensea			TRUE
cg26714129	-0.128488	0.591671	-5.07731	0.000133173	0.0164427	0.828576	0.655915	0.527427	-0.128488	8	142310710	F	I		IGR	opensea	IGR-opensea
cg09912793	0.101388	0.622195	5.07729	0.000133178	0.0164427	0.828533	0.571501	0.672889	0.101388	12	9066382	R	II	PHC1	TSS1500	shore	TSS1500-shore	chr12:9066946-9067480
cg14855931	0.183949	0.694694	5.07549	0.000133644	0.0164763	0.824995	0.602719	0.786669	0.183949	3	138631456	R	II		IGR	shelf	IGR-shelf	chr3:138634445-138634989
cg10894222	-0.136396	0.666527	-5.07479	0.000133824	0.0164837	0.823632	0.734725	0.598329	-0.136396	3	149543247	F	II	RNF13	5'UTR	opensea	5'UTR-opensea			TRUE
cg19673549	-0.167007	0.762735	-5.06861	0.000135438	0.0165613	0.811474	0.846238	0.679232	-0.167007	5	54916621	F	II		IGR	opensea	IGR-opensea			TRUE
cg21096966	0.127662	0.467168	5.06825	0.000135533	0.0165682	0.810759	0.403337	0.530999	0.127662	14	45432458	F	II	KLHL28	TSS1500	shore	TSS1500-shore	chr14:45431628-45432115
cg07638450	-0.160698	0.52824	-5.06657	0.000135974	0.0166027	0.807469	0.608589	0.447891	-0.160698	7	101796416	F	II	CUX1	Body	opensea	Body-opensea		TRUE	TRUE
cg13005635	-0.14716	0.673149	-5.06615	0.000136086	0.0166116	0.80663	0.746729	0.599569	-0.14716	12	11093283	R	II	TAS2R14	TSS1500	opensea	TSS1500-opensea
cg10169194	-0.112217	0.135109	-5.0649	0.000136416	0.0166277	0.804177	0.191218	0.0790002	-0.112217	22	41763253	R	II	TEF	TSS200	opensea	TSS200-opensea			TRUE
cg11063877	0.116781	0.462434	5.06456	0.000136505	0.0166338	0.803512	0.404043	0.520824	0.116781	12	50793961	F	II	LARP4	TSS1500	shore	TSS1500-shore	chr12:50794549-50794920
cg04512129	0.125962	0.846809	5.06357	0.000136767	0.016653	0.801566	0.783828	0.90979	0.125962	7	41823437	F	II		IGR	opensea	IGR-opensea			TRUE
cg06559839	0.10046	0.63688	5.06166	0.000137274	0.0166765	0.797814	0.58665	0.68711	0.10046	10	73133003	F	II		IGR	shelf	IGR-shelf	chr10:73136971-73137352
cg17942618	0.113091	0.440754	5.06142	0.000137341	0.0166765	0.797325	0.384208	0.4973	0.113091	1	32409867	R	II		IGR	shore	IGR-shore	chr1:32410188-32410630	TRUE
cg08134681	0.1371	0.536957	5.0596	0.000137825	0.0166787	0.793758	0.468407	0.605508	0.1371	2	88742592	R	II		IGR	opensea	IGR-opensea			TRUE
cg10793646	0.122399	0.607734	5.05941	0.000137875	0.0166799	0.793389	0.546535	0.668934	0.122399	12	63024414	R	II		IGR	shore	IGR-shore	chr12:63025588-63026213		TRUE
cg01618928	-0.155643	0.633222	-5.05721	0.000138466	0.0167323	0.789048	0.711043	0.5554	-0.155643	17	79870762	F	II	PCYT2	TSS1500	shore	TSS1500-shore	chr17:79868687-79869811	TRUE
cg02484611	0.116269	0.837118	5.05137	0.000140044	0.0168575	0.77756	0.778983	0.895252	0.116269	4	170072339	R	II	SH3RF1	Body	opensea	Body-opensea			TRUE
cg15008085	0.165994	0.689664	5.05119	0.000140094	0.0168575	0.777201	0.606667	0.772661	0.165994	6	2248207	F	II		IGR	shelf	IGR-shelf	chr6:2245118-2246153
cg13737493	0.152586	0.850542	5.04825	0.000140895	0.0169092	0.771419	0.774249	0.926835	0.152586	9	92216472	R	II		IGR	shelf	IGR-shelf	chr9:92218833-92219259
cg02008285	0.147627	0.531329	5.04786	0.000141002	0.0169124	0.770646	0.457516	0.605143	0.147627	14	97446061	F	II		IGR	opensea	IGR-opensea
cg23368416	0.147069	0.780353	5.0461	0.000141485	0.0169516	0.767178	0.706818	0.853887	0.147069	12	14926317	F	II	H2AFJ	TSS1500	shore	TSS1500-shore	chr12:14927291-14928023				rs7964485
cg14281092	-0.121152	0.439759	-5.04591	0.000141536	0.0169516	0.766812	0.500335	0.379182	-0.121152	2	153226118	F	II	FMNL2	Body	opensea	Body-opensea			TRUE
cg20468415	0.102481	0.745055	5.04548	0.000141654	0.0169516	0.765966	0.693814	0.796296	0.102481	8	41592973	F	II	ANK1	Body	opensea	Body-opensea		TRUE	TRUE
cg01606878	0.134475	0.827088	5.0446	0.000141896	0.0169568	0.764236	0.75985	0.894325	0.134475	8	119065431	F	II	EXT1	Body	opensea	Body-opensea			TRUE		rs28357309
cg08464093	0.113508	0.858386	5.04365	0.00014216	0.0169741	0.762357	0.801632	0.91514	0.113508	2	68654146	R	II		IGR	opensea	IGR-opensea			TRUE
cg01818776	0.100823	0.687356	5.0414	0.000142782	0.0169854	0.757925	0.636945	0.737767	0.100823	8	25202910	R	II	DOCK5	Body	opensea	Body-opensea		TRUE	TRUE
cg16243532	0.114781	0.503874	5.04102	0.000142885	0.0169854	0.757193	0.446483	0.561264	0.114781	3	138617437	F	II		IGR	opensea	IGR-opensea			TRUE		rs56939541
cg15920975	-0.108235	0.255628	-5.04009	0.000143146	0.0170047	0.755347	0.309746	0.20151	-0.108235	11	65194933	R	II		IGR	shelf	IGR-shelf	chr11:65190824-65191058			low-CpG:64951457-64951665
cg07010146	-0.109525	0.287974	-5.03781	0.000143781	0.0170464	0.750861	0.342737	0.233212	-0.109525	10	105239205	R	II	CALHM3	TSS1500	opensea	TSS1500-opensea		TRUE
cg24504014	-0.142418	0.743586	-5.03697	0.000144015	0.0170634	0.749209	0.814794	0.672377	-0.142418	11	110297121	F	II		IGR	shelf	IGR-shelf	chr11:110300574-110301334
cg18338460	0.1177	0.665538	5.03628	0.000144208	0.0170645	0.747852	0.606688	0.724388	0.1177	2	105858167	R	II	GPR45	TSS200	shore	TSS200-shore	chr2:105858587-105859084
cg22608160	0.119511	0.823187	5.03477	0.000144633	0.0170786	0.744867	0.763431	0.882942	0.119511	1	95352630	R	II	SLC44A3	Body	opensea	Body-opensea			TRUE
cg26502485	0.111039	0.826379	5.03448	0.000144713	0.0170786	0.744307	0.77086	0.881899	0.111039	5	95018729	R	II	SPATA9	TSS200	opensea	TSS200-opensea
cg26343889	0.13866	0.472801	5.0344	0.000144736	0.0170786	0.744147	0.403471	0.542131	0.13866	15	68848244	R	II		IGR	shelf	IGR-shelf	chr15:68851826-68852208
cg15726123	0.160821	0.478386	5.03414	0.00014481	0.0170786	0.743628	0.397976	0.558797	0.160821	3	46718979	F	II	ALS2CL	TSS200	opensea	TSS200-opensea					rs76720862
cg05871254	0.133444	0.519799	5.03129	0.000145614	0.0171191	0.738017	0.453078	0.586521	0.133444	17	14213225	F	II	HS3ST3B1	Body	shore	Body-shore	chr17:14212363-14212788		TRUE
cg06787622	-0.105834	0.477222	-5.02928	0.000146182	0.0171476	0.734067	0.530139	0.424305	-0.105834	15	101233935	F	II		IGR	opensea	IGR-opensea			TRUE
cg03639429	0.101546	0.666874	5.02459	0.000147522	0.0172136	0.724814	0.616101	0.717648	0.101546	7	55070311	R	II		IGR	shore	IGR-shore	chr7:55072266-55072622
cg02638523	0.165115	0.682195	5.02431	0.000147602	0.0172181	0.724269	0.599638	0.764753	0.165115	2	236548728	R	II	AGAP1	Body	opensea	Body-opensea			TRUE
cg08203460	0.143516	0.191369	5.02351	0.000147834	0.0172356	0.722677	0.119611	0.263127	0.143516	7	11999601	F	II		IGR	opensea	IGR-opensea			TRUE
cg26459229	0.119783	0.691705	5.02177	0.000148334	0.0172605	0.719252	0.631814	0.751597	0.119783	12	105744023	F	II	C12orf75	Body	opensea	Body-opensea			TRUE
cg10753966	0.11	0.728952	5.02054	0.000148689	0.0172723	0.716827	0.673952	0.783952	0.11	3	55556197	R	II	ERC2	3'UTR	opensea	3'UTR-opensea			TRUE
cg04110213	-0.155326	0.456693	-5.01879	0.000149196	0.0173176	0.713381	0.534356	0.379029	-0.155326	14	104024505	R	II	BAG5	3'UTR	shelf	3'UTR-shelf	chr14:104028308-104029671	TRUE
cg01154353	0.131104	0.520298	5.01857	0.000149258	0.0173201	0.712957	0.454746	0.58585	0.131104	13	44953908	R	II	SERP2	Body	opensea	Body-opensea			TRUE
cg19897113	0.131213	0.697933	5.01695	0.000149729	0.0173365	0.709763	0.632326	0.76354	0.131213	1	26083702	F	I	MAN1C1	Body	opensea	Body-opensea			TRUE
cg20786280	0.15206	0.217265	5.01383	0.000150643	0.0174189	0.703596	0.141235	0.293295	0.15206	8	30892276	R	II	PURG	TSS1500	opensea	TSS1500-opensea
cg20824939	-0.133984	0.591374	-5.01382	0.000150644	0.0174189	0.703588	0.658367	0.524382	-0.133984	1	205255082	F	II		IGR	opensea	IGR-opensea			TRUE
cg14722693	-0.11912	0.202813	-5.01291	0.000150913	0.0174352	0.701779	0.262373	0.143253	-0.11912	8	19436451	R	II	CSGALNACT1	5'UTR	opensea	5'UTR-opensea			TRUE
cg19190519	0.103289	0.80131	5.01044	0.000151638	0.0174775	0.69692	0.749665	0.852955	0.103289	11	123175740	F	II		IGR	shelf	IGR-shelf	chr11:123172454-123173104
cg03767333	0.173472	0.431818	5.0095	0.000151915	0.0174937	0.695068	0.345082	0.518554	0.173472	12	89938002	R	II		IGR	opensea	IGR-opensea			TRUE
cg14893161	0.120499	0.465608	5.00915	0.000152021	0.0174938	0.694364	0.405359	0.525858	0.120499	1	205819251	R	II	PM20D1	5'UTR	shore	5'UTR-shore	chr1:205818898-205819191		TRUE
cg19701828	-0.138959	0.276475	-5.00907	0.000152044	0.0174938	0.694209	0.345954	0.206995	-0.138959	2	219235515	R	II		IGR	shelf	IGR-shelf	chr2:219232375-219232892
cg10446433	0.118276	0.561995	5.00561	0.000153071	0.0175735	0.68739	0.502857	0.621133	0.118276	2	28442539	F	II	BRE	Body	opensea	Body-opensea			TRUE
cg14519093	-0.157548	0.680523	-5.00375	0.000153626	0.0176261	0.683721	0.759297	0.601748	-0.157548	9	134616431	R	II		IGR	opensea	IGR-opensea
cg26099045	0.143855	0.441014	5.00297	0.00015386	0.0176448	0.682176	0.369087	0.512942	0.143855	2	64291800	F	II		IGR	opensea	IGR-opensea			TRUE
cg08562111	0.249791	0.643937	5.00148	0.000154307	0.0176672	0.679238	0.519041	0.768832	0.249791	2	214101586	F	II		IGR	opensea	IGR-opensea			TRUE
cg14906810	-0.165662	0.39305	-4.99961	0.000154869	0.0177123	0.675551	0.475881	0.310219	-0.165662	2	152378577	F	II	NEB	Body	opensea	Body-opensea			TRUE
cg00571483	0.131307	0.252373	4.99261	0.000156997	0.0178184	0.661721	0.186719	0.318027	0.131307	1	59046173	R	II		IGR	shelf	IGR-shelf	chr1:59042013-59043295
cg20790648	0.119514	0.534152	4.99251	0.000157025	0.0178184	0.661538	0.474395	0.593909	0.119514	3	151619923	R	II		IGR	opensea	IGR-opensea			TRUE
cg04140834	0.113218	0.770349	4.99151	0.000157334	0.017833	0.659547	0.71374	0.826958	0.113218	1	111320416	R	II		IGR	shelf	IGR-shelf	chr1:111323223-111323433
cg12660383	0.101484	0.840035	4.98992	0.00015782	0.0178605	0.656417	0.789292	0.890777	0.101484	4	124171623	F	II	SPATA5	Body	opensea	Body-opensea			TRUE
cg09382107	-0.104814	0.392668	-4.98914	0.000158061	0.0178733	0.654873	0.445075	0.340261	-0.104814	3	48199542	F	II	CDC25A	3'UTR	opensea	3'UTR-opensea			TRUE
cg22705918	0.1112	0.299751	4.9832	0.000159901	0.0179638	0.643146	0.244152	0.355351	0.1112	2	25518238	F	II	DNMT3A	Body	opensea	Body-opensea		TRUE	TRUE
cg22850925	-0.102207	0.804879	-4.98184	0.000160324	0.017985	0.640467	0.855982	0.753775	-0.102207	4	146743669	F	II	ZNF827	Body	opensea	Body-opensea			TRUE
cg13080487	0.101194	0.652775	4.98146	0.000160444	0.017985	0.639708	0.602178	0.703372	0.101194	11	34622359	F	II		IGR	opensea	IGR-opensea			TRUE
cg01223086	0.142045	0.651045	4.98114	0.000160545	0.017985	0.639073	0.580023	0.722068	0.142045	15	96896680	F	II		IGR	shore	IGR-shore	chr15:96896928-96897301		TRUE
cg18264284	0.122431	0.483797	4.97895	0.00016123	0.0180186	0.634756	0.422581	0.545012	0.122431	17	63102478	F	II		IGR	opensea	IGR-opensea			TRUE		rs72518534
cg15806588	0.123613	0.385964	4.97749	0.000161691	0.0180425	0.631865	0.324158	0.447771	0.123613	13	29177556	F	II		IGR	opensea	IGR-opensea			TRUE
cg19506849	-0.146732	0.349774	-4.97613	0.000162121	0.0180558	0.629169	0.42314	0.276408	-0.146732	10	114767609	R	II	TCF7L2	Body	opensea	Body-opensea			TRUE
cg01704778	0.150558	0.807587	4.97521	0.000162413	0.0180603	0.627349	0.732308	0.882865	0.150558	X	55649107	F	II	FOXR2	TSS1500	opensea	TSS1500-opensea
cg04628256	0.1028	0.736787	4.97478	0.000162547	0.0180603	0.626509	0.685387	0.788187	0.1028	3	31571701	R	II		IGR	shore	IGR-shore	chr3:31573302-31575282
cg01109227	0.103029	0.455613	4.97459	0.000162608	0.0180623	0.62613	0.404099	0.507127	0.103029	6	35480779	F	II	TULP1	TSS200	shore	TSS200-shore	chr6:35479388-35479678
cg26818573	0.189425	0.509488	4.97419	0.000162734	0.0180715	0.625345	0.414776	0.604201	0.189425	2	46717839	F	II		IGR	opensea	IGR-opensea			TRUE
cg03945895	-0.105488	0.65671	-4.9686	0.000164518	0.0181785	0.614295	0.709454	0.603966	-0.105488	1	14111352	F	II	PRDM2	Body	opensea	Body-opensea			TRUE		rs76923512
cg26144594	-0.105441	0.395316	-4.96821	0.000164644	0.0181861	0.613522	0.448036	0.342595	-0.105441	8	125861056	F	II		IGR	opensea	IGR-opensea			TRUE
cg22360146	-0.141126	0.770283	-4.96646	0.000165207	0.0182252	0.610064	0.840846	0.69972	-0.141126	1	115301208	F	II	CSDE1	TSS1500	opensea	TSS1500-opensea
cg25201372	0.142464	0.782813	4.96496	0.000165692	0.0182369	0.607091	0.711581	0.854045	0.142464	13	75941163	R	II	TBC1D4	Body	opensea	Body-opensea			TRUE
cg01116477	0.14331	0.450454	4.96481	0.000165741	0.0182369	0.606792	0.378799	0.522109	0.14331	5	34053399	R	II		IGR	opensea	IGR-opensea		TRUE	TRUE
cg02234653	-0.182238	0.50911	-4.9621	0.000166619	0.0183	0.601441	0.600228	0.417991	-0.182238	2	224625080	R	II	AP1S3	Body	opensea	Body-opensea			TRUE
cg19388930	0.152835	0.44998	4.96134	0.000166866	0.0183188	0.599941	0.373563	0.526397	0.152835	11	129564373	F	II		IGR	opensea	IGR-opensea
cg21532103	0.103577	0.701529	4.96079	0.000167044	0.0183324	0.598856	0.649741	0.753318	0.103577	2	238535538	R	II	LRRFIP1	TSS1500	shore	TSS1500-shore	chr2:238535561-238536840	TRUE
cg26615176	-0.134339	0.432956	-4.9598	0.00016737	0.0183404	0.596885	0.500126	0.365787	-0.134339	11	65150416	F	II	SLC25A45	TSS1500	shelf	TSS1500-shelf	chr11:65153726-65154606	TRUE	TRUE
cg00997054	0.102017	0.79358	4.95869	0.000167731	0.0183599	0.594697	0.742571	0.844588	0.102017	3	32904291	F	II	TRIM71	Body	opensea	Body-opensea			TRUE
cg00147286	0.125606	0.658914	4.95707	0.000168264	0.0183873	0.591487	0.596111	0.721717	0.125606	16	70713933	R	I	MTSS1L	Body	island	Body-island	chr16:70713461-70714379	TRUE	TRUE
cg07164556	0.175108	0.432036	4.95577	0.00016869	0.0184026	0.588926	0.344482	0.519589	0.175108	1	145727247	R	II	PDZK1	TSS1500	opensea	TSS1500-opensea			TRUE
cg11575644	0.140477	0.670475	4.95292	0.000169631	0.0184772	0.583286	0.600236	0.740713	0.140477	19	10464711	F	II	TYK2	Body	island	Body-island	chr19:10464666-10464927	TRUE
cg25363080	0.112826	0.588751	4.94971	0.0001707	0.018545	0.576925	0.532338	0.645164	0.112826	5	81452987	R	II	ATG10	Body	opensea	Body-opensea			TRUE
cg21573135	0.115402	0.794356	4.9497	0.000170701	0.018545	0.576917	0.736655	0.852057	0.115402	15	71595576	F	II	THSD4	Body	opensea	Body-opensea			TRUE
cg10791541	0.105231	0.706786	4.94721	0.000171534	0.0185742	0.571986	0.654171	0.759402	0.105231	3	55040617	F	II	CACNA2D3	Body	opensea	Body-opensea			TRUE		rs76647824
cg12341429	-0.128545	0.307977	-4.94686	0.000171652	0.0185812	0.571286	0.372249	0.243705	-0.128545	2	161887154	F	II		IGR	opensea	IGR-opensea		TRUE	TRUE
cg12177944	0.1317	0.335778	4.94634	0.000171828	0.0185859	0.570252	0.269928	0.401628	0.1317	3	129322537	R	I	PLXND1	Body	shore	Body-shore	chr3:129323915-129325332	TRUE	TRUE
cg19339179	0.131539	0.793757	4.94368	0.000172723	0.0186482	0.564988	0.727988	0.859526	0.131539	4	113324678	F	II	ALPK1	Body	opensea	Body-opensea			TRUE
cg03466587	0.10966	0.233945	4.94243	0.000173142	0.0186575	0.562529	0.179115	0.288775	0.10966	3	187704482	F	II		IGR	opensea	IGR-opensea		TRUE	TRUE
cg17589449	-0.126853	0.542596	-4.9421	0.000173256	0.0186636	0.561864	0.606023	0.47917	-0.126853	22	31588863	F	II	RNF185	Body	opensea	Body-opensea			TRUE		rs76438484	rs75951213
cg25422678	0.126895	0.562311	4.94163	0.000173415	0.0186695	0.560937	0.498864	0.625759	0.126895	2	28304502	R	II	BRE	Body	opensea	Body-opensea			TRUE
cg25912037	0.111695	0.450725	4.94093	0.000173653	0.0186777	0.559547	0.394878	0.506573	0.111695	2	173125140	R	II		IGR	opensea	IGR-opensea			TRUE			rs77970182
cg09495645	-0.171783	0.635764	-4.93992	0.000173996	0.0186835	0.557547	0.721655	0.549872	-0.171783	6	164376576	R	II		IGR	opensea	IGR-opensea			TRUE
cg03766264	-0.19721	0.553084	-4.93943	0.000174162	0.0186846	0.556583	0.651689	0.454479	-0.19721	12	27396229	F	II	STK38L	TSS1500	shore	TSS1500-shore	chr12:27396982-27397646
cg10248100	-0.121241	0.464346	-4.93801	0.000174644	0.0186976	0.553779	0.524966	0.403725	-0.121241	7	872053	F	II	UNC84A	5'UTR	opensea	5'UTR-opensea		TRUE	TRUE		rs6952577
cg14149623	0.120978	0.56297	4.93685	0.000175041	0.0187217	0.55148	0.502481	0.623459	0.120978	21	47053072	R	II		IGR	island	IGR-island	chr21:47053054-47054404					rs72497638
cg16336556	-0.153479	0.476512	-4.93545	0.000175521	0.0187503	0.548704	0.553252	0.399772	-0.153479	2	33295138	R	II	LTBP1	Body	opensea	Body-opensea		TRUE	TRUE
cg24044052	-0.111535	0.282018	-4.93519	0.000175612	0.0187503	0.548179	0.337785	0.226251	-0.111535	2	231191662	R	II	SP140L	TSS1500	opensea	TSS1500-opensea		TRUE
cg15345396	-0.160119	0.379664	-4.93257	0.000176511	0.0187894	0.543008	0.459723	0.299604	-0.160119	14	99928727	F	II	SETD3	Body	opensea	Body-opensea			TRUE
cg00543474	-0.101195	0.141885	-4.93253	0.000176526	0.0187894	0.542925	0.192482	0.0912878	-0.101195	10	134260981	R	II	C10orf91	Body	opensea	Body-opensea		TRUE	TRUE
cg22939324	0.170098	0.66046	4.93136	0.000176929	0.0188002	0.54061	0.575411	0.745509	0.170098	10	91128729	F	II		IGR	opensea	IGR-opensea			TRUE
cg22128724	0.138314	0.548177	4.93113	0.00017701	0.0188002	0.540151	0.479021	0.617334	0.138314	2	85402928	F	II	TCF7L1	Body	opensea	Body-opensea		TRUE	TRUE		rs2583543
cg08235822	0.182222	0.502489	4.92982	0.000177466	0.0188081	0.537543	0.411378	0.5936	0.182222	22	28280359	F	II	PITPNB	Body	opensea	Body-opensea			TRUE	low-CpG:26610202-26610433
cg27417606	0.147556	0.558522	4.92497	0.000179157	0.018912	0.527934	0.484744	0.6323	0.147556	14	21503144	R	II	RNASE13	TSS1500	opensea	TSS1500-opensea
cg14106933	0.254503	0.445422	4.92427	0.000179401	0.0189282	0.526556	0.318171	0.572674	0.254503	2	201194453	F	II	SPATS2L	5'UTR	opensea	5'UTR-opensea			TRUE
cg00856041	0.112937	0.119959	4.92378	0.000179574	0.0189322	0.525582	0.06349	0.176427	0.112937	6	27798455	R	II		IGR	shore	IGR-shore	chr6:27798990-27799427
cg25518707	0.115836	0.444066	4.92179	0.000180273	0.0189917	0.521644	0.386148	0.501984	0.115836	17	60801924	R	II	45726	Body	opensea	Body-opensea			TRUE
cg20214973	0.127128	0.829313	4.91933	0.000181143	0.0190274	0.516767	0.765749	0.892877	0.127128	2	42092039	R	II		IGR	opensea	IGR-opensea			TRUE
cg08812108	-0.124471	0.251375	-4.9192	0.000181189	0.0190274	0.51651	0.313611	0.189139	-0.124471	6	2515318	R	I		IGR	opensea	IGR-opensea
cg07751669	0.212107	0.492228	4.91866	0.000181381	0.0190274	0.515439	0.386175	0.598281	0.212107	9	114546247	R	II	C9orf84	TSS1500	opensea	TSS1500-opensea
cg20076659	0.119884	0.38178	4.91837	0.000181485	0.0190335	0.51486	0.321838	0.441722	0.119884	14	79760047	F	II	NRXN3	Body	opensea	Body-opensea			TRUE
cg15818005	0.104745	0.370958	4.91789	0.000181656	0.0190425	0.513905	0.318585	0.42333	0.104745	2	138845177	R	II		IGR	opensea	IGR-opensea			TRUE
cg00550340	0.106522	0.563241	4.91536	0.000182557	0.0190899	0.508894	0.50998	0.616502	0.106522	17	72985299	R	II	CDR2L	Body	shore	Body-shore	chr17:72983621-72984591		TRUE			rs9900009
cg16597737	-0.165065	0.60996	-4.91498	0.000182691	0.0190976	0.50815	0.692492	0.527427	-0.165065	1	173572370	R	II	SLC9A11	TSS200	opensea	TSS200-opensea
cg17609282	0.178143	0.802701	4.91182	0.000183826	0.0191597	0.501876	0.71363	0.891773	0.178143	7	77032864	F	II	PION	Body	opensea	Body-opensea			TRUE
cg02522196	0.154405	0.77243	4.91146	0.000183954	0.0191683	0.501172	0.695228	0.849633	0.154405	12	44226393	F	II		IGR	shelf	IGR-shelf	chr12:44229710-44230164
cg18899117	0.103145	0.65179	4.90976	0.000184571	0.0191981	0.497783	0.600217	0.703362	0.103145	2	206411031	F	II	PARD3B	Body	opensea	Body-opensea			TRUE			rs78581049
cg16301894	0.10157	0.52587	4.90878	0.000184922	0.0192125	0.495856	0.475085	0.576655	0.10157	4	129389744	F	II		IGR	opensea	IGR-opensea			TRUE
cg06576783	0.106205	0.671858	4.90695	0.000185587	0.019249	0.492224	0.618756	0.724961	0.106205	6	53572893	R	II		IGR	opensea	IGR-opensea			TRUE
cg03064524	0.133567	0.695259	4.9068	0.000185641	0.019249	0.491929	0.628475	0.762042	0.133567	12	66890229	R	II	GRIP1	Body	opensea	Body-opensea			TRUE
cg19554235	-0.124553	0.603831	-4.90437	0.000186528	0.0193073	0.487101	0.666107	0.541555	-0.124553	20	43159912	R	II	PKIG	TSS1500	shore	TSS1500-shore	chr20:43160339-43160817
cg27155163	0.137159	0.661092	4.90245	0.000187232	0.0193508	0.483285	0.592512	0.729671	0.137159	7	151026011	R	II		IGR	opensea	IGR-opensea			TRUE
cg06162185	0.159567	0.43036	4.90216	0.000187336	0.0193508	0.482724	0.350577	0.510144	0.159567	10	8546551	F	II		IGR	opensea	IGR-opensea
cg24181771	0.183677	0.215715	4.90189	0.000187436	0.0193508	0.48218	0.123876	0.307553	0.183677	6	28706472	R	II		IGR	opensea	IGR-opensea					rs7450419
cg20040747	-0.137788	0.237949	-4.90066	0.000187887	0.0193718	0.479747	0.306843	0.169054	-0.137788	15	74715105	F	II	SEMA7A	Body	opensea	Body-opensea		TRUE	TRUE
cg00714672	0.104809	0.846021	4.90004	0.000188118	0.0193908	0.478505	0.793617	0.898426	0.104809	16	53749034	R	II	FTO	Body	opensea	Body-opensea			TRUE
cg17494585	0.116518	0.753031	4.89865	0.000188628	0.0194101	0.475761	0.694771	0.81129	0.116518	1	117705743	R	II	VTCN1	Body	opensea	Body-opensea			TRUE
cg10560420	0.177657	0.591084	4.89799	0.000188874	0.0194121	0.474439	0.502255	0.679912	0.177657	2	159911769	F	II	TANC1	5'UTR	opensea	5'UTR-opensea			TRUE
cg11845168	0.104267	0.681385	4.89631	0.000189495	0.0194143	0.471119	0.629251	0.733518	0.104267	13	21457096	F	II	XPO4	Body	opensea	Body-opensea			TRUE
cg19981409	0.137147	0.505631	4.89573	0.00018971	0.0194264	0.469969	0.437057	0.574204	0.137147	11	89225042	R	II	NOX4	TSS1500	shore	TSS1500-shore	chr11:89224416-89224718
cg24996979	-0.134254	0.208626	-4.89504	0.000189968	0.0194434	0.468592	0.275753	0.141499	-0.134254	14	74223355	F	II	C14orf43	5'UTR	shelf	5'UTR-shelf	chr14:74225626-74227209	TRUE			rs28605040
cg11291798	0.165256	0.60632	4.8948	0.000190059	0.019448	0.46811	0.523692	0.688948	0.165256	7	143103859	F	II	EPHA1	Body	opensea	Body-opensea			TRUE
cg01176393	0.219075	0.389564	4.89226	0.000191007	0.0194863	0.463071	0.280026	0.499102	0.219075	2	214020960	F	II		IGR	shelf	IGR-shelf	chr2:214016357-214017105
cg24123106	0.1063	0.66505	4.89074	0.000191575	0.0195106	0.460063	0.6119	0.7182	0.1063	6	123100471	R	II	FABP7	TSS200	opensea	TSS200-opensea			TRUE
cg23037321	-0.130926	0.344693	-4.89015	0.000191796	0.0195166	0.458894	0.410156	0.27923	-0.130926	1	181003203	R	II	MR1	1stExon	opensea	1stExon-opensea		TRUE	TRUE
cg14140118	0.136072	0.20605	4.88939	0.000192084	0.0195318	0.457373	0.138015	0.274086	0.136072	11	108423031	F	II	EXPH5	TSS200	opensea	TSS200-opensea
cg13320585	0.188507	0.402985	4.88817	0.000192542	0.0195647	0.454961	0.308732	0.497239	0.188507	12	79812901	R	II	MIR1252	TSS200	opensea	TSS200-opensea
cg00221658	-0.114692	0.252071	-4.88673	0.000193089	0.0196055	0.45209	0.309417	0.194725	-0.114692	7	43912425	R	II		IGR	shelf	IGR-shelf	chr7:43908911-43909478	TRUE	TRUE
cg19914238	-0.10592	0.741113	-4.88611	0.000193322	0.0196146	0.45087	0.794073	0.688153	-0.10592	2	113483728	R	II		IGR	opensea	IGR-opensea			TRUE
cg04337594	0.127522	0.716604	4.88549	0.000193557	0.0196177	0.449638	0.652843	0.780365	0.127522	11	952928	R	II	AP2A2	Body	opensea	Body-opensea			TRUE
cg08280341	0.140021	0.817883	4.88543	0.000193579	0.0196177	0.449525	0.747872	0.887893	0.140021	2	164594200	R	II		IGR	shore	IGR-shore	chr2:164592917-164593511
cg06949673	0.159354	0.61326	4.88393	0.00019415	0.0196469	0.446541	0.533583	0.692937	0.159354	1	56463319	R	II		IGR	opensea	IGR-opensea			TRUE
cg26744081	0.12755	0.823557	4.88252	0.000194688	0.0196776	0.443739	0.759782	0.887331	0.12755	7	28176110	R	II	JAZF1	Body	opensea	Body-opensea			TRUE
cg10107292	0.114095	0.694587	4.88144	0.000195102	0.0196864	0.441589	0.63754	0.751635	0.114095	1	15504438	F	II	TMEM51	5'UTR	opensea	5'UTR-opensea			TRUE
cg06786349	0.12874	0.680427	4.87945	0.000195863	0.0197269	0.437647	0.616057	0.744797	0.12874	20	19815086	F	II		IGR	opensea	IGR-opensea			TRUE
cg08836024	0.119468	0.811854	4.87852	0.000196221	0.0197472	0.435797	0.75212	0.871588	0.119468	6	88300917	F	II	RARS2	TSS1500	shore	TSS1500-shore	chr6:88299620-88299945
cg01664039	0.10392	0.634384	4.87804	0.000196407	0.019751	0.434839	0.582424	0.686343	0.10392	8	118941962	R	II	EXT1	Body	opensea	Body-opensea			TRUE
cg04143120	-0.131022	0.791509	-4.87491	0.000197616	0.0198009	0.428627	0.85702	0.725998	-0.131022	11	72968848	R	II		IGR	opensea	IGR-opensea		TRUE	TRUE
cg02816525	-0.122452	0.209415	-4.87488	0.000197629	0.0198009	0.42856	0.27064	0.148189	-0.122452	15	59024033	F	II	ADAM10	Body	opensea	Body-opensea		TRUE	TRUE
cg02765731	0.112742	0.591711	4.87276	0.00019845	0.0198339	0.424363	0.53534	0.648082	0.112742	12	83436797	R	II	TMTC2	Body	opensea	Body-opensea			TRUE
cg05990805	0.230099	0.561905	4.87202	0.000198741	0.0198493	0.422879	0.446855	0.676954	0.230099	3	126370678	R	II		IGR	shelf	IGR-shelf	chr3:126373571-126374142
cg19924948	-0.103897	0.239588	-4.87201	0.000198745	0.0198493	0.422857	0.291537	0.18764	-0.103897	2	11970722	F	II		IGR	opensea	IGR-opensea		TRUE	TRUE
cg22280402	0.147052	0.544561	4.87115	0.000199078	0.0198778	0.421161	0.471035	0.618087	0.147052	7	143596849	R	II	FAM115A	5'UTR	shelf	5'UTR-shelf	chr7:143598867-143599426		TRUE
cg04293770	0.220943	0.423306	4.86709	0.000200673	0.019972	0.413085	0.312834	0.533777	0.220943	5	148330536	F	II		IGR	opensea	IGR-opensea			TRUE
cg11944287	0.100311	0.315229	4.86705	0.000200686	0.019972	0.413019	0.265073	0.365385	0.100311	11	72532555	F	II	ATG16L2	Body	shore	Body-shore	chr11:72532612-72533774		TRUE		rs1864651
cg19350020	0.132259	0.604478	4.86622	0.000201014	0.0199999	0.411363	0.538348	0.670607	0.132259	11	118489198	R	II	PHLDB1	Body	opensea	Body-opensea			TRUE
cg01312828	0.102224	0.419666	4.86574	0.000201203	0.0200053	0.410411	0.368554	0.470778	0.102224	6	41648365	F	II		IGR	shelf	IGR-shelf	chr6:41650672-41651582
cg18673409	0.102495	0.35412	4.8656	0.000201258	0.0200053	0.410136	0.302872	0.405367	0.102495	17	74448160	R	II	AANAT	TSS1500	shore	TSS1500-shore	chr17:74448388-74449424
cg04470060	0.126132	0.822426	4.86517	0.000201429	0.0200096	0.409276	0.75936	0.885493	0.126132	5	141870810	R	II		IGR	opensea	IGR-opensea			TRUE
cg26033504	-0.125453	0.851465	-4.86462	0.000201646	0.0200159	0.408185	0.914191	0.788738	-0.125453	1	201458737	R	II	CSRP1	Body	opensea	Body-opensea		TRUE	TRUE
cg26509318	0.100631	0.402118	4.86415	0.000201834	0.0200166	0.407241	0.351802	0.452433	0.100631	12	122019760	R	II	KDM2B	TSS1500	shore	TSS1500-shore	chr12:122018170-122018457
cg25305776	-0.196432	0.464041	-4.86291	0.000202324	0.0200373	0.404787	0.562257	0.365825	-0.196432	8	30573560	F	II	GSR	Body	opensea	Body-opensea			TRUE
cg07776993	-0.112446	0.256138	-4.86133	0.000202954	0.0200743	0.401641	0.312361	0.199915	-0.112446	8	145596943	R	I	ADCK5	TSS1500	shore	TSS1500-shore	chr8:145597414-145598588
cg02297838	0.171049	0.257067	4.86018	0.000203414	0.0201103	0.399348	0.171542	0.342592	0.171049	13	92002454	F	II	MIR19A	TSS1500	shore	TSS1500-shore	chr13:91999541-92001441
cg08840913	0.167378	0.582856	4.8578	0.000204367	0.0201525	0.394619	0.499167	0.666545	0.167378	2	24139933	R	II	ATAD2B	Body	opensea	Body-opensea			TRUE
cg21931839	0.14834	0.304299	4.85668	0.000204816	0.0201758	0.392397	0.23013	0.378469	0.14834	2	163200302	R	II	GCA	TSS1500	shore	TSS1500-shore	chr2:163200575-163201025	TRUE
cg26907472	0.110576	0.376411	4.85583	0.000205156	0.0201792	0.390716	0.321122	0.431699	0.110576	16	69006828	F	II	TMCO7	Body	opensea	Body-opensea			TRUE
cg14136781	0.199379	0.711521	4.85545	0.000205309	0.0201792	0.389959	0.611832	0.81121	0.199379	9	124087974	R	II	GSN	Body	opensea	Body-opensea			TRUE
cg04682850	-0.142671	0.44428	-4.85379	0.00020598	0.0202049	0.386656	0.515616	0.372945	-0.142671	2	189155606	F	II		IGR	shore	IGR-shore	chr2:189156416-189157719
cg24921221	-0.142014	0.171456	-4.85328	0.000206187	0.0202135	0.385639	0.242463	0.100449	-0.142014	8	12584192	R	II	LONRF1	Body	opensea	Body-opensea			TRUE
cg15717275	0.112507	0.586929	4.85233	0.000206573	0.0202278	0.383747	0.530675	0.643182	0.112507	22	29598916	R	II		IGR	shelf	IGR-shelf	chr22:29601547-29602291	TRUE	TRUE
cg03051777	0.197806	0.536177	4.85083	0.000207184	0.0202546	0.380757	0.437273	0.63508	0.197806	12	115131789	R	II		IGR	shore	IGR-shore	chr12:115130008-115130242		TRUE
cg11080540	-0.113035	0.337392	-4.85046	0.000207334	0.020256	0.380026	0.393909	0.280874	-0.113035	5	54897272	R	II		IGR	opensea	IGR-opensea		TRUE	TRUE
cg27310092	-0.137663	0.147049	-4.84985	0.000207581	0.020256	0.378818	0.215881	0.0782177	-0.137663	1	151945663	R	II		IGR	opensea	IGR-opensea		TRUE	TRUE
cg02936493	-0.1823	0.754351	-4.84973	0.000207632	0.020256	0.378573	0.845501	0.663202	-0.1823	7	73223935	R	II		IGR	opensea	IGR-opensea
cg04957757	0.107246	0.399406	4.84809	0.000208303	0.0202839	0.375306	0.345782	0.453029	0.107246	16	70463218	R	II	ST3GAL2	5'UTR	opensea	5'UTR-opensea			TRUE
cg13544946	0.154462	0.719249	4.84629	0.00020904	0.0203274	0.371729	0.642018	0.796481	0.154462	9	35729779	R	II	TLN1	5'UTR	shelf	5'UTR-shelf	chr9:35732124-35732757	TRUE
cg08843513	0.135755	0.674739	4.84573	0.00020927	0.0203451	0.370618	0.606862	0.742617	0.135755	3	14164955	F	II	TMEM43	TSS1500	shore	TSS1500-shore	chr3:14165717-14166999				rs35653652
cg23694490	-0.107868	0.646686	-4.84489	0.000209614	0.020355	0.368955	0.70062	0.592752	-0.107868	7	47445681	R	II	TNS3	Body	opensea	Body-opensea		TRUE	TRUE
cg16377117	0.111221	0.422727	4.84425	0.000209879	0.020376	0.367675	0.367116	0.478337	0.111221	12	57526305	F	II	LRP1	Body	opensea	Body-opensea			TRUE
cg07903144	-0.11663	0.82532	-4.84317	0.000210323	0.0203956	0.365536	0.883635	0.767005	-0.11663	6	33358872	F	II	KIFC1	TSS1500	shore	TSS1500-shore	chr6:33359097-33359975
cg19862899	0.103801	0.457929	4.8413	0.0002111	0.0204448	0.361804	0.406029	0.50983	0.103801	10	82173556	F	II	C10orf58	TSS200	opensea	TSS200-opensea			TRUE
cg04331756	0.121847	0.539487	4.84113	0.000211171	0.0204449	0.361463	0.478564	0.600411	0.121847	10	8546532	F	II		IGR	opensea	IGR-opensea
cg10837383	0.110308	0.744021	4.83812	0.000212425	0.0205184	0.35547	0.688867	0.799175	0.110308	6	9096296	R	II		IGR	opensea	IGR-opensea			TRUE
cg18000445	0.156429	0.49374	4.83719	0.000212811	0.0205375	0.353634	0.415525	0.571955	0.156429	6	11032802	R	II	ELOVL2	Body	opensea	Body-opensea			TRUE
cg23346544	0.136101	0.315845	4.83628	0.000213192	0.0205584	0.351824	0.247795	0.383896	0.136101	8	80731144	R	I		IGR	opensea	IGR-opensea			TRUE
cg26207568	0.141515	0.586337	4.83522	0.000213638	0.0205843	0.349707	0.51558	0.657095	0.141515	5	14173773	F	II	TRIO	Body	opensea	Body-opensea			TRUE		rs77157520
cg27547053	-0.144183	0.72882	-4.83407	0.000214121	0.0206088	0.347423	0.800912	0.656728	-0.144183	1	56531471	R	II		IGR	opensea	IGR-opensea			TRUE
cg10158280	0.103724	0.692111	4.83265	0.00021472	0.0206368	0.344594	0.640249	0.743973	0.103724	17	30954650	R	II	MYO1D	Body	opensea	Body-opensea			TRUE
cg01549929	0.164876	0.691021	4.83099	0.000215421	0.0206614	0.341295	0.608583	0.773459	0.164876	16	54683714	F	II		IGR	opensea	IGR-opensea			TRUE
cg02872868	0.182549	0.51459	4.82967	0.000215985	0.0206919	0.33865	0.423315	0.605864	0.182549	4	186565192	R	II	SORBS2	Body	opensea	Body-opensea			TRUE
cg01574481	0.111595	0.819682	4.82849	0.000216486	0.0206927	0.336305	0.763885	0.87548	0.111595	14	24641852	R	I	REC8	Body	island	Body-island	chr14:24641053-24642220		TRUE
cg08963616	0.189505	0.689877	4.82837	0.000216534	0.0206927	0.336078	0.595125	0.784629	0.189505	8	17249585	F	II	MTMR7	Body	opensea	Body-opensea			TRUE		rs79064491
cg19729693	0.114794	0.488848	4.82786	0.000216752	0.0206995	0.33506	0.431451	0.546245	0.114794	17	45948135	F	II		IGR	shore	IGR-shore	chr17:45949676-45949885
cg22955778	0.184178	0.231442	4.82758	0.000216874	0.0207064	0.334493	0.139353	0.323532	0.184178	6	27798556	R	II		IGR	shore	IGR-shore	chr6:27798990-27799427				rs79168586
cg14863944	0.171403	0.758088	4.82476	0.00021808	0.0207791	0.328881	0.672387	0.84379	0.171403	13	22740131	F	II		IGR	opensea	IGR-opensea
cg05826596	0.101305	0.44264	4.82309	0.000218796	0.0208167	0.325564	0.391987	0.493292	0.101305	17	42516205	R	II	GPATCH8	Body	opensea	Body-opensea			TRUE
cg06854264	0.11314	0.176627	4.82222	0.000219172	0.0208344	0.323825	0.120057	0.233196	0.11314	1	200861254	F	II	C1orf106	Body	shore	Body-shore	chr1:200860076-200860576	TRUE
cg13526642	0.106194	0.654454	4.82218	0.000219189	0.0208344	0.323749	0.601357	0.707551	0.106194	9	112877160	R	II	AKAP2	Body	opensea	Body-opensea			TRUE
cg13278004	-0.133298	0.188387	-4.81981	0.000220216	0.0208473	0.319017	0.255036	0.121738	-0.133298	2	231191876	R	II	SP140L	TSS200	opensea	TSS200-opensea		TRUE
cg01871995	0.103615	0.664975	4.81958	0.000220314	0.0208473	0.318564	0.613167	0.716782	0.103615	8	17754363	F	II	FGL1	TSS1500	opensea	TSS1500-opensea
cg00442282	-0.126985	0.504641	-4.81933	0.000220423	0.0208473	0.318068	0.568134	0.441149	-0.126985	17	38471064	F	II	RARA	5'UTR	shore	5'UTR-shore	chr17:38472958-38473201	TRUE	TRUE
cg19727381	0.145171	0.703965	4.81772	0.00022112	0.0208562	0.31487	0.63138	0.776551	0.145171	8	855862	F	I		IGR	opensea	IGR-opensea
cg03681057	0.102796	0.757431	4.817	0.000221434	0.0208691	0.313435	0.706033	0.808829	0.102796	5	143172702	F	II		IGR	opensea	IGR-opensea			TRUE		rs10515525
cg07167872	0.142744	0.702038	4.81573	0.000221988	0.0209053	0.310907	0.630666	0.77341	0.142744	1	205819463	F	II	PM20D1	TSS200	shore	TSS200-shore	chr1:205818898-205819191	TRUE
cg20751057	0.152705	0.754636	4.81477	0.000222408	0.0209355	0.308992	0.678284	0.830989	0.152705	3	134226577	F	II	CEP63	Body	opensea	Body-opensea			TRUE
cg10774352	0.210193	0.545253	4.81214	0.000223563	0.0210113	0.303753	0.440156	0.650349	0.210193	6	72206414	R	II		IGR	opensea	IGR-opensea			TRUE
cg05471495	-0.110867	0.179481	-4.81196	0.000223645	0.0210143	0.30338	0.234914	0.124047	-0.110867	2	101369330	R	II		IGR	opensea	IGR-opensea		TRUE	TRUE
cg05374044	0.189013	0.388584	4.81018	0.000224427	0.0210643	0.299848	0.294078	0.483091	0.189013	8	19451024	F	II	CSGALNACT1	5'UTR	opensea	5'UTR-opensea			TRUE
cg21410954	0.186371	0.634118	4.80979	0.000224602	0.0210713	0.299058	0.540933	0.727303	0.186371	1	225703895	R	II	ENAH	Body	opensea	Body-opensea			TRUE
cg24466377	0.120385	0.344672	4.80749	0.000225622	0.0211036	0.294474	0.284479	0.404864	0.120385	19	46268509	F	II	SIX5	3'UTR	shore	3'UTR-shore	chr19:46270162-46270420		TRUE
cg16201146	0.101671	0.379522	4.80703	0.000225828	0.0211036	0.293553	0.328686	0.430357	0.101671	20	19191526	R	II		IGR	shore	IGR-shore	chr20:19192459-19193902
cg00308438	0.154357	0.568511	4.80678	0.000225938	0.0211036	0.29306	0.491332	0.645689	0.154357	1	92329399	R	II	TGFBR3	5'UTR	opensea	5'UTR-opensea			TRUE
cg02099877	0.131573	0.524485	4.80643	0.000226091	0.0211036	0.292375	0.458699	0.590272	0.131573	3	172416062	F	II	NCEH1	5'UTR	opensea	5'UTR-opensea			TRUE		rs11348088
cg18591136	-0.114343	0.62035	-4.80589	0.000226333	0.0211095	0.291291	0.677522	0.563178	-0.114343	10	121282670	F	I	RGS10	Body	opensea	Body-opensea			TRUE
cg25211875	0.134794	0.681428	4.80582	0.000226364	0.0211095	0.291152	0.614031	0.748825	0.134794	15	55944483	F	II	PRTG	Body	opensea	Body-opensea			TRUE		rs572531
cg16568084	-0.149358	0.631436	-4.80397	0.000227191	0.0211389	0.287464	0.706115	0.556757	-0.149358	7	93811563	R	II		IGR	opensea	IGR-opensea			TRUE
cg09749364	0.15874	0.279098	4.80377	0.000227282	0.0211389	0.287056	0.199728	0.358468	0.15874	15	40384779	R	II	BMF	Body	opensea	Body-opensea		TRUE	TRUE		rs80056127
cg22053159	-0.14666	0.255102	-4.80342	0.000227438	0.0211402	0.286365	0.328432	0.181771	-0.14666	6	2478543	R	II		IGR	opensea	IGR-opensea			TRUE
cg07686035	-0.112511	0.572925	-4.80185	0.000228141	0.0211719	0.283243	0.62918	0.51667	-0.112511	7	107300408	F	II	SLC26A4	TSS1500	shore	TSS1500-shore	chr7:107301205-107302416
cg02060627	0.10121	0.768978	4.80093	0.000228558	0.0211874	0.281394	0.718373	0.819583	0.10121	1	22378412	F	II	CDC42	TSS1500	shore	TSS1500-shore	chr1:22379009-22380029
cg25906537	0.119128	0.517918	4.80015	0.00022891	0.0212033	0.279838	0.458354	0.577482	0.119128	15	41860668	R	II	TYRO3	Body	opensea	Body-opensea			TRUE
cg07800544	0.129768	0.659049	4.79977	0.000229079	0.0212122	0.279089	0.594165	0.723933	0.129768	5	35129387	F	II	PRLR	5'UTR	opensea	5'UTR-opensea			TRUE
cg15434778	0.190677	0.691862	4.79863	0.000229594	0.0212276	0.276815	0.596523	0.7872	0.190677	14	79982284	R	II	NRXN3	Body	opensea	Body-opensea			TRUE			rs76987894
cg01116568	0.115362	0.540646	4.79835	0.000229723	0.0212276	0.27625	0.482965	0.598327	0.115362	11	10476529	R	II	AMPD3	TSS200	shelf	TSS200-shelf	chr11:10472000-10472857	TRUE				rs10709823
cg18261205	0.135298	0.277884	4.79806	0.00022985	0.0212276	0.275688	0.210235	0.345532	0.135298	15	96897151	R	I		IGR	island	IGR-island	chr15:96896928-96897301	TRUE
cg04156940	0.166142	0.491265	4.79718	0.000230252	0.0212337	0.27392	0.408194	0.574336	0.166142	7	55197704	F	II	EGFR	Body	opensea	Body-opensea			TRUE
cg18328334	0.106963	0.29393	4.7958	0.000230879	0.0212666	0.271172	0.240449	0.347412	0.106963	2	218808652	R	II	TNS1	1stExon	opensea	1stExon-opensea		TRUE
cg23882945	0.155509	0.424922	4.79532	0.000231097	0.0212731	0.270214	0.347167	0.502676	0.155509	4	113300580	R	II	ALPK1	Body	island	Body-island	chr4:113300552-113300769		TRUE
cg01008154	0.104254	0.513602	4.79525	0.000231127	0.0212731	0.270084	0.461475	0.565729	0.104254	1	46509395	R	II	PIK3R3	Body	opensea	Body-opensea			TRUE
cg06189235	0.113681	0.741911	4.79432	0.00023155	0.0212731	0.268232	0.685071	0.798752	0.113681	1	167175573	R	II		IGR	opensea	IGR-opensea			TRUE
cg08650402	0.122748	0.717401	4.79423	0.000231592	0.0212731	0.268049	0.656027	0.778776	0.122748	17	28193399	F	II	SSH2	Body	opensea	Body-opensea			TRUE
cg12502577	0.144908	0.521214	4.79364	0.000231861	0.0212781	0.266877	0.44876	0.593668	0.144908	12	57615581	F	II	NXPH4	Body	shelf	Body-shelf	chr12:57618769-57619402		TRUE
cg17653411	-0.109552	0.326822	-4.79364	0.000231863	0.0212781	0.266866	0.381598	0.272046	-0.109552	2	112908185	F	II	FBLN7	Body	opensea	Body-opensea		TRUE	TRUE
cg22683259	0.114268	0.803147	4.79265	0.000232317	0.0213011	0.264889	0.746013	0.860281	0.114268	3	146241314	F	II	PLSCR1	Body	opensea	Body-opensea			TRUE
cg12651761	0.155107	0.475402	4.78854	0.000234208	0.0214092	0.256687	0.397849	0.552956	0.155107	17	18128022	F	II	LLGL1	TSS1500	shore	TSS1500-shore	chr17:18128577-18128821
cg17634572	0.207464	0.620556	4.787	0.000234917	0.0214301	0.253627	0.516824	0.724288	0.207464	8	20146604	R	II		IGR	opensea	IGR-opensea			TRUE
cg22507354	0.124366	0.466474	4.78677	0.000235023	0.0214301	0.253172	0.404291	0.528657	0.124366	17	62493832	F	II	POLG2	TSS1500	shore	TSS1500-shore	chr17:62492882-62493323					rs9904364
cg03831289	0.126707	0.292602	4.78245	0.000237038	0.0215071	0.244537	0.229248	0.355956	0.126707	5	90624793	R	II		IGR	opensea	IGR-opensea			TRUE
cg01511742	0.144288	0.510305	4.78202	0.000237235	0.0215104	0.243695	0.438161	0.58245	0.144288	3	71112437	R	II	FOXP1	Body	shore	Body-shore	chr3:71113896-71114102		TRUE
cg27058988	0.136242	0.521383	4.78197	0.000237258	0.0215104	0.243596	0.453262	0.589504	0.136242	15	67200879	F	II		IGR	opensea	IGR-opensea			TRUE
cg18053973	0.140343	0.328872	4.78105	0.000237692	0.0215266	0.241749	0.2587	0.399043	0.140343	4	174703955	R	II		IGR	opensea	IGR-opensea			TRUE
cg15177855	0.109389	0.657487	4.78084	0.00023779	0.0215309	0.24133	0.602793	0.712181	0.109389	11	70517411	F	II	SHANK2	Body	opensea	Body-opensea			TRUE
cg06194809	0.112638	0.375855	4.77784	0.000239199	0.0215887	0.235354	0.319536	0.432175	0.112638	7	100042467	F	II		IGR	opensea	IGR-opensea		TRUE	TRUE
cg03333253	0.104962	0.806915	4.7776	0.000239316	0.0215947	0.23486	0.754434	0.859396	0.104962	6	44125693	F	II	CAPN11	TSS1500	opensea	TSS1500-opensea
cg09734761	0.108769	0.56278	4.77571	0.000240207	0.0216425	0.231101	0.508396	0.617164	0.108769	16	85569506	F	II		IGR	opensea	IGR-opensea			TRUE		rs77986207
cg04128880	0.164689	0.567619	4.77368	0.000241172	0.0216803	0.227045	0.485274	0.649963	0.164689	16	22198056	F	II		IGR	shelf	IGR-shelf	chr16:22201388-22202791
cg17799287	0.17534	0.175186	4.77364	0.000241193	0.0216803	0.226958	0.0875157	0.262856	0.17534	13	92001764	F	II	MIR19A	TSS1500	shore	TSS1500-shore	chr13:91999541-92001441
cg04001802	0.112811	0.766978	4.77297	0.000241513	0.0217039	0.225615	0.710573	0.823384	0.112811	10	15085279	F	II	OLAH	TSS1500	opensea	TSS1500-opensea					rs12146383
cg17100200	0.10144	0.835925	4.77056	0.00024266	0.0217703	0.220823	0.785205	0.886645	0.10144	1	42618313	F	II	GUCA2B	TSS1500	opensea	TSS1500-opensea
cg01379656	0.162283	0.721172	4.76884	0.000243487	0.0218212	0.217384	0.640031	0.802313	0.162283	3	174970696	F	II	NAALADL2	Body	opensea	Body-opensea			TRUE
cg10372057	-0.106757	0.873913	-4.76651	0.000244608	0.0218938	0.212736	0.927291	0.820534	-0.106757	7	41448992	F	II		IGR	opensea	IGR-opensea			TRUE		rs79036485
cg07139329	0.149019	0.542078	4.76491	0.000245384	0.0219301	0.209531	0.467569	0.616588	0.149019	1	201708558	F	II	NAV1	TSS1500	shore	TSS1500-shore	chr1:201708787-201709429	TRUE			rs41270955
cg10701110	0.102225	0.505955	4.76491	0.000245385	0.0219301	0.20953	0.454843	0.557068	0.102225	1	161017007	R	II	USF1	TSS1500	opensea	TSS1500-opensea
cg13480898	0.105113	0.733194	4.76356	0.00024604	0.0219591	0.20683	0.680637	0.78575	0.105113	19	10195914	R	II	C19orf66	TSS1500	shore	TSS1500-shore	chr19:10196696-10197857
cg07491676	0.114291	0.670208	4.76038	0.00024759	0.0220232	0.20048	0.613062	0.727353	0.114291	15	76400783	F	II	C15orf27	5'UTR	opensea	5'UTR-opensea			TRUE		rs75825378
cg04207746	0.133828	0.773329	4.76036	0.000247597	0.0220232	0.200453	0.706415	0.840243	0.133828	1	236448232	R	II		IGR	shelf	IGR-shelf	chr1:236444603-236445700
cg20422511	0.107706	0.803102	4.76017	0.000247692	0.0220232	0.200062	0.749249	0.856955	0.107706	11	73085118	F	II		IGR	shelf	IGR-shelf	chr11:73087229-73088294
cg26977759	0.120904	0.557183	4.75856	0.000248483	0.022039	0.19684	0.496731	0.617635	0.120904	8	37518651	F	II		IGR	opensea	IGR-opensea			TRUE		rs2154452
cg13663855	0.157031	0.55403	4.7571	0.000249197	0.0220757	0.193938	0.475515	0.632545	0.157031	14	21095414	F	II		IGR	shelf	IGR-shelf	chr14:21091094-21091439
cg16967578	0.134662	0.646352	4.75707	0.000249212	0.0220757	0.193876	0.579021	0.713683	0.134662	1	218575437	R	II	TGFB2	Body	opensea	Body-opensea			TRUE
cg16078269	0.1179	0.748638	4.75562	0.000249929	0.0221038	0.190969	0.689688	0.807587	0.1179	18	45568004	R	II	ZBTB7C	TSS1500	opensea	TSS1500-opensea
cg18027592	0.120695	0.641833	4.75363	0.000250912	0.022161	0.187001	0.581486	0.702181	0.120695	13	76235074	F	II	LMO7	Body	opensea	Body-opensea			TRUE		rs9544015
cg03225208	0.11235	0.686319	4.75127	0.000252084	0.0222318	0.18229	0.630144	0.742493	0.11235	9	124412094	R	II	DAB2IP	Body	shore	Body-shore	chr9:124413512-124414193		TRUE
cg08116263	0.126702	0.831558	4.75105	0.000252194	0.0222348	0.181848	0.768207	0.894909	0.126702	6	132837117	R	II		IGR	shelf	IGR-shelf	chr6:132833798-132834349
cg26226650	-0.143067	0.799525	-4.75082	0.000252311	0.0222379	0.181378	0.871059	0.727991	-0.143067	3	50276265	R	II	GNAI2	Body	shore	Body-shore	chr3:50275393-50275645	TRUE	TRUE
cg09697978	-0.216724	0.455202	-4.7485	0.000253467	0.0223058	0.176756	0.563564	0.34684	-0.216724	2	37501815	F	II	PRKD3	Body	opensea	Body-opensea			TRUE		rs67883956
cg24281777	-0.109371	0.470624	-4.7472	0.000254118	0.0223243	0.17416	0.52531	0.415939	-0.109371	3	166162926	R	II		IGR	opensea	IGR-opensea			TRUE
cg07388018	0.104627	0.15318	4.74684	0.000254302	0.0223243	0.173431	0.100867	0.205494	0.104627	17	38721888	F	II	CCR7	TSS200	opensea	TSS200-opensea			TRUE
cg00687444	0.139252	0.678728	4.74668	0.000254382	0.0223243	0.173113	0.609102	0.748354	0.139252	16	30689627	R	II		IGR	opensea	IGR-opensea
cg02885922	0.108556	0.840893	4.74483	0.000255314	0.0223714	0.169412	0.786615	0.895171	0.108556	22	47078434	F	II		IGR	shelf	IGR-shelf	chr22:47081750-47082045
cg04625338	-0.176296	0.404043	-4.74357	0.000255948	0.0224082	0.166904	0.492191	0.315895	-0.176296	7	55141971	R	I	EGFR	Body	opensea	Body-opensea		TRUE	TRUE
cg22139212	0.109306	0.828941	4.74093	0.000257291	0.0224791	0.161611	0.774289	0.883594	0.109306	15	68062715	F	II	MAP2K5	Body	opensea	Body-opensea			TRUE
cg16822666	0.108201	0.501057	4.74013	0.000257695	0.0224893	0.160025	0.446957	0.555157	0.108201	17	35656660	R	II	ACACA	5'UTR	opensea	5'UTR-opensea			TRUE
cg08105396	-0.184815	0.347966	-4.73823	0.000258664	0.0225429	0.156229	0.440374	0.255558	-0.184815	1	153539058	F	I	S100A2	TSS1500	opensea	TSS1500-opensea					rs3762269
cg25583619	0.121538	0.605281	4.73704	0.000259277	0.0225512	0.153838	0.544512	0.66605	0.121538	5	96218069	F	II	ERAP2	Body	opensea	Body-opensea			TRUE
cg07968906	0.101981	0.782333	4.73702	0.000259287	0.0225512	0.1538	0.731342	0.833323	0.101981	17	40822942	F	II	PLEKHH3	Body	island	Body-island	chr17:40821935-40823573		TRUE
cg07203561	0.138434	0.158588	4.73613	0.000259741	0.0225512	0.152029	0.0893708	0.227805	0.138434	12	121570677	R	II	P2RX7	5'UTR	opensea	5'UTR-opensea		TRUE	TRUE	low-CpG:120055038-120055141		rs74798563
cg24645671	0.173064	0.587326	4.73558	0.000260027	0.0225512	0.150918	0.500794	0.673858	0.173064	7	42656871	F	II		IGR	opensea	IGR-opensea			TRUE
cg14600885	0.106398	0.19847	4.73357	0.00026106	0.0226078	0.146906	0.145271	0.251669	0.106398	5	150040280	F	II	MYOZ3	TSS200	shelf	TSS200-shelf	chr5:150035968-150036629
cg27328839	-0.11399	0.747371	-4.73319	0.000261256	0.0226141	0.14615	0.804366	0.690376	-0.11399	10	79679462	F	II	DLG5	Body	opensea	Body-opensea		TRUE	TRUE
cg25311470	0.1046	0.123407	4.73208	0.000261832	0.0226395	0.14392	0.0711065	0.175707	0.1046	7	107950866	F	II	NRCAM	5'UTR	opensea	5'UTR-opensea			TRUE
cg05569131	0.102487	0.662735	4.7292	0.000263328	0.0227234	0.138162	0.611492	0.713979	0.102487	6	36665620	F	II		IGR	opensea	IGR-opensea				low-CpG:36773532-36773608	rs9394373
cg16163382	-0.128425	0.375585	-4.72433	0.000265878	0.0228591	0.128416	0.439797	0.311372	-0.128425	2	37938640	F	II		IGR	opensea	IGR-opensea		TRUE	TRUE		rs74546381
cg08615567	0.102867	0.474664	4.7186	0.000268908	0.0230348	0.116962	0.42323	0.526097	0.102867	10	125651621	F	II	CPXM2	TSS200	shore	TSS200-shore	chr10:125650820-125651373
cg21033632	-0.123117	0.62289	-4.71752	0.000269484	0.0230654	0.114798	0.684449	0.561332	-0.123117	5	64486421	F	II	ADAMTS6	Body	opensea	Body-opensea			TRUE
cg02535674	0.117402	0.606315	4.71613	0.00027023	0.0231057	0.112004	0.547614	0.665016	0.117402	20	52226352	F	I		IGR	opensea	IGR-opensea			TRUE	low-CpG:51659724-51659778
cg23569968	0.103318	0.821132	4.71489	0.000270894	0.0231212	0.10952	0.769473	0.872791	0.103318	11	62185488	F	II	SCGB1A1	TSS1500	opensea	TSS1500-opensea
cg11809342	0.124615	0.770502	4.71371	0.000271528	0.0231556	0.107158	0.708194	0.832809	0.124615	2	160007430	R	II	TANC1	Body	opensea	Body-opensea			TRUE
cg13722700	0.215532	0.530825	4.71019	0.000273427	0.0232468	0.100115	0.423059	0.638591	0.215532	10	46993502	F	I	GPRIN2	TSS200	shore	TSS200-shore	chr10:46992447-46993295	TRUE				rs3127807
cg18636739	0.190652	0.416905	4.70931	0.000273904	0.0232685	0.0983526	0.321579	0.512231	0.190652	12	10870175	F	II	CSDA	Body	opensea	Body-opensea			TRUE
cg09917805	0.105386	0.554712	4.70858	0.0002743	0.0232881	0.09689	0.502018	0.607405	0.105386	4	4763596	F	II		IGR	opensea	IGR-opensea
cg03354554	-0.15716	0.523064	-4.7084	0.000274396	0.0232916	0.0965353	0.601644	0.444484	-0.15716	11	9781412	F	II		IGR	shore	IGR-shore	chr11:9779592-9780470	TRUE			rs12787856
cg26567688	0.144579	0.348762	4.70814	0.000274536	0.0232979	0.0960205	0.276473	0.421052	0.144579	5	74762295	R	II	COL4A3BP	Body	opensea	Body-opensea			TRUE
cg11761535	0.150021	0.417825	4.70742	0.00027493	0.0233099	0.0945726	0.342815	0.492836	0.150021	3	149051031	R	II	TM4SF18	Body	opensea	Body-opensea			TRUE
cg21453420	0.15435	0.705193	4.7055	0.000275977	0.0233598	0.0907307	0.628018	0.782368	0.15435	1	198122196	F	II		IGR	shelf	IGR-shelf	chr1:198125896-198126842
cg00309965	0.114511	0.497966	4.70355	0.000277046	0.0234096	0.0868214	0.440711	0.555221	0.114511	5	138842336	F	II	ECSCR	TSS200	opensea	TSS200-opensea
cg16865890	0.132975	0.772044	4.70268	0.000277521	0.0234162	0.0850893	0.705557	0.838532	0.132975	17	77669201	R	II		IGR	opensea	IGR-opensea
cg11965913	0.137261	0.36335	4.70188	0.000277961	0.0234381	0.0834878	0.294719	0.43198	0.137261	1	205819406	R	II	PM20D1	TSS200	shore	TSS200-shore	chr1:205818898-205819191	TRUE
cg27640794	0.113739	0.570281	4.70122	0.000278326	0.0234548	0.0821615	0.513412	0.627151	0.113739	4	169555699	R	II	PALLD	5'UTR	shelf	5'UTR-shelf	chr4:169552716-169552947	TRUE	TRUE
cg25743819	0.120327	0.666507	4.69894	0.000279589	0.0235102	0.0775844	0.606344	0.72667	0.120327	2	173245704	F	II		IGR	opensea	IGR-opensea			TRUE		rs12477699
cg11284631	0.181448	0.629692	4.69874	0.000279697	0.0235102	0.0771951	0.538968	0.720416	0.181448	5	38870649	F	II	OSMR	Body	opensea	Body-opensea			TRUE
cg26228859	-0.129752	0.465211	-4.69874	0.000279698	0.0235102	0.0771933	0.530087	0.400336	-0.129752	15	40802888	R	II		IGR	shore	IGR-shore	chr15:40803580-40804195
cg11067453	0.120242	0.756455	4.69747	0.000280403	0.0235211	0.0746461	0.696334	0.816576	0.120242	1	24637997	R	II		IGR	opensea	IGR-opensea			TRUE
cg10615591	-0.183644	0.269025	-4.69695	0.00028069	0.0235211	0.0736129	0.360847	0.177203	-0.183644	20	62318433	R	I	RTEL1	Body	island	Body-island	chr20:62318359-62318658		TRUE
cg00085438	0.105745	0.65665	4.6968	0.000280773	0.0235211	0.0733141	0.603778	0.709523	0.105745	3	152049980	F	II	MBNL1	Body	opensea	Body-opensea			TRUE
cg12461099	-0.13564	0.674047	-4.69624	0.000281087	0.0235211	0.0721838	0.741867	0.606227	-0.13564	1	19217794	R	II	ALDH4A1	TSS1500	opensea	TSS1500-opensea			TRUE
cg19034132	-0.142364	0.44973	-4.69503	0.000281761	0.0235602	0.0697648	0.520912	0.378548	-0.142364	10	75692227	F	II		IGR	opensea	IGR-opensea		TRUE	TRUE
cg03138970	-0.148159	0.713745	-4.69441	0.000282109	0.0235707	0.0685173	0.787825	0.639666	-0.148159	5	177539698	R	II	N4BP3	TSS1500	shore	TSS1500-shore	chr5:177540207-177541234
cg20385229	0.165066	0.420019	4.69403	0.000282319	0.0235788	0.0677634	0.337486	0.502552	0.165066	14	78175470	F	II	ALKBH1	TSS1500	shore	TSS1500-shore	chr14:78174054-78174550
cg12926693	0.124346	0.518106	4.69258	0.000283134	0.0236103	0.0648516	0.455933	0.580279	0.124346	6	36665611	F	II		IGR	opensea	IGR-opensea				low-CpG:36773532-36773608	rs9394373
cg03096126	0.139897	0.322697	4.69255	0.000283151	0.0236103	0.0647911	0.252748	0.392645	0.139897	18	56531159	F	I	ZNF532	5'UTR	island	5'UTR-island	chr18:56530395-56531288	TRUE		high-CpG:54681487-54682276
cg10036013	0.157872	0.395674	4.69241	0.000283229	0.0236103	0.0645101	0.316738	0.47461	0.157872	7	4778839	F	II	FOXK1	Body	opensea	Body-opensea		TRUE	TRUE
cg00703445	-0.123023	0.63681	-4.69178	0.000283582	0.0236327	0.0632539	0.698321	0.575299	-0.123023	17	53500432	R	II	MMD	TSS1500	shore	TSS1500-shore	chr17:53498243-53499546
cg00059089	0.109831	0.412766	4.68985	0.000284667	0.0236856	0.0593925	0.357851	0.467681	0.109831	2	153263288	R	II	FMNL2	Body	opensea	Body-opensea			TRUE		rs35854482
cg24690715	0.132314	0.573543	4.68963	0.000284795	0.0236915	0.0589386	0.507386	0.639701	0.132314	20	62455532	F	II		IGR	opensea	IGR-opensea
cg05883978	-0.200947	0.651607	-4.68829	0.000285553	0.0237358	0.056252	0.75208	0.551134	-0.200947	5	9498781	F	I	SEMA5A	5'UTR	opensea	5'UTR-opensea			TRUE		rs1398336
cg10241183	-0.117362	0.812281	-4.6874	0.000286055	0.0237634	0.0544791	0.870962	0.7536	-0.117362	1	88026790	R	II		IGR	opensea	IGR-opensea			TRUE
cg03080336	0.16353	0.542953	4.68703	0.000286268	0.0237671	0.0537258	0.461189	0.624718	0.16353	4	186033378	F	II		IGR	opensea	IGR-opensea		TRUE	TRUE
cg19620086	0.11032	0.545004	4.68621	0.000286733	0.0237866	0.0520849	0.489844	0.600164	0.11032	12	46768016	R	II	SLC38A2	TSS1500	shore	TSS1500-shore	chr12:46765134-46766633
cg11601336	0.116432	0.651583	4.68573	0.000287006	0.0237908	0.0511241	0.593367	0.709799	0.116432	19	19053012	F	II	HOMER3	TSS1500	shore	TSS1500-shore	chr19:19051019-19051939
cg10539298	-0.138869	0.830287	-4.68368	0.000288174	0.02385	0.0470199	0.899722	0.760853	-0.138869	7	6315828	R	II		IGR	shelf	IGR-shelf	chr7:6311322-6312526
cg00941010	-0.165049	0.583715	-4.68325	0.000288422	0.0238554	0.0461487	0.666239	0.50119	-0.165049	8	107218994	F	II		IGR	opensea	IGR-opensea			TRUE
cg07086945	0.124364	0.508067	4.68276	0.0002887	0.0238701	0.0451756	0.445884	0.570249	0.124364	6	109036145	R	II		IGR	opensea	IGR-opensea			TRUE
cg17888985	0.100944	0.654392	4.67844	0.000291187	0.0239909	0.0365076	0.60392	0.704864	0.100944	10	126898290	R	II		IGR	opensea	IGR-opensea			TRUE
cg00551143	-0.109076	0.633342	-4.67832	0.000291253	0.0239916	0.0362791	0.68788	0.578804	-0.109076	7	28998860	R	II	TRIL	TSS1500	shore	TSS1500-shore	chr7:28995305-28998541
cg01365117	0.110995	0.690459	4.67713	0.00029194	0.0240306	0.0338961	0.634962	0.745956	0.110995	2	208761957	F	II	PLEKHM3	Body	opensea	Body-opensea			TRUE
cg04174091	0.136814	0.575544	4.67131	0.000295336	0.0241408	0.0222119	0.507137	0.643951	0.136814	11	122935222	R	II		IGR	shore	IGR-shore	chr11:122932173-122933803
cg04505435	0.107879	0.756915	4.67072	0.00029568	0.0241576	0.0210339	0.702975	0.810855	0.107879	11	70672511	F	II	SHANK2	Body	shore	Body-shore	chr11:70672834-70673055	TRUE
cg06713671	-0.164321	0.535592	-4.66998	0.000296111	0.024164	0.019561	0.617753	0.453431	-0.164321	19	5914158	R	II	CAPS	TSS200	shore	TSS200-shore	chr19:5915007-5915301	TRUE	TRUE
cg17194270	0.117254	0.52849	4.6696	0.000296338	0.0241738	0.0187888	0.469863	0.587117	0.117254	22	39759992	R	II	SYNGR1	Body	opensea	Body-opensea			TRUE			rs9622999
cg24134292	0.119664	0.606668	4.66894	0.000296723	0.0241771	0.0174757	0.546835	0.6665	0.119664	8	142315841	F	II		IGR	shelf	IGR-shelf	chr8:142318353-142319155
cg13844779	0.151841	0.357001	4.66852	0.000296972	0.0241845	0.0166288	0.281081	0.432921	0.151841	9	82093630	R	II		IGR	opensea	IGR-opensea			TRUE
cg14272049	0.10999	0.588019	4.66781	0.00029739	0.0241987	0.0152063	0.533024	0.643014	0.10999	12	92453691	F	II		IGR	opensea	IGR-opensea			TRUE			rs63261961
cg07290269	0.146735	0.480994	4.66732	0.00029768	0.0242167	0.0142216	0.407627	0.554362	0.146735	12	31479853	R	II	FAM60A	TSS1500	shore	TSS1500-shore	chr12:31476717-31479466				rs11051388
cg16930572	0.135373	0.792093	4.6671	0.00029781	0.0242167	0.0137829	0.724406	0.859779	0.135373	12	16761118	F	II	LMO3	TSS200	opensea	TSS200-opensea					rs80276382
cg22534374	0.116829	0.779241	4.66661	0.000298101	0.0242254	0.0127941	0.720827	0.837655	0.116829	1	201511610	R	II		IGR	shelf	IGR-shelf	chr1:201507779-201509317
cg18964319	0.159827	0.376338	4.66613	0.000298388	0.0242254	0.0118228	0.296424	0.456251	0.159827	6	36665554	R	II		IGR	opensea	IGR-opensea				low-CpG:36773532-36773608
cg25233139	0.161384	0.503698	4.66558	0.000298709	0.0242264	0.0107357	0.423006	0.58439	0.161384	13	112187396	F	II		IGR	opensea	IGR-opensea
cg14184524	0.155969	0.530792	4.66497	0.000299075	0.0242374	0.00949765	0.452808	0.608777	0.155969	9	75449747	R	II	TMC1	Body	opensea	Body-opensea			TRUE
cg22353823	0.118756	0.631613	4.6645	0.000299353	0.0242409	0.00856065	0.572235	0.690992	0.118756	12	105860607	R	II		IGR	opensea	IGR-opensea			TRUE
cg06661266	0.123974	0.410217	4.66447	0.00029937	0.0242409	0.00850288	0.34823	0.472205	0.123974	3	134027721	R	II		IGR	shelf	IGR-shelf	chr3:134031662-134032591		TRUE
cg14668981	0.132279	0.69113	4.66419	0.000299537	0.0242421	0.00793971	0.624991	0.75727	0.132279	3	133112774	F	II	TMEM108	Body	opensea	Body-opensea			TRUE		rs74707458
cg22708818	0.113951	0.708957	4.66391	0.000299703	0.0242508	0.00738057	0.651981	0.765933	0.113951	2	26538435	R	II	GPR113	Body	opensea	Body-opensea			TRUE
cg21227325	-0.131546	0.553881	-4.6625	0.000300546	0.0242805	0.00454182	0.619654	0.488107	-0.131546	9	78776599	R	II	PCSK5	Body	opensea	Body-opensea			TRUE
cg00113117	0.177208	0.50697	4.65754	0.00030352	0.0244142	-0.00540856	0.418366	0.595574	0.177208	1	56946754	F	II		IGR	shelf	IGR-shelf	chr1:56943401-56943669				rs6588636
cg22980427	0.119786	0.731272	4.65669	0.000304033	0.0244321	-0.00711479	0.671379	0.791165	0.119786	6	137421461	R	II		IGR	opensea	IGR-opensea			TRUE
cg22626169	0.118713	0.283893	4.6562	0.000304327	0.0244462	-0.00809076	0.224536	0.34325	0.118713	6	6890951	F	II		IGR	opensea	IGR-opensea			TRUE		rs11434284
cg03201096	0.130627	0.698758	4.65577	0.000304589	0.0244534	-0.00896034	0.633445	0.764072	0.130627	7	29518198	F	II	CHN2	TSS1500	opensea	TSS1500-opensea					rs3793254
cg25030049	0.174614	0.764602	4.65524	0.00030491	0.0244636	-0.0100225	0.677296	0.851909	0.174614	1	56169508	R	II		IGR	opensea	IGR-opensea			TRUE
cg16932560	0.106753	0.152273	4.65507	0.000305011	0.024464	-0.0103599	0.0988958	0.205649	0.106753	6	31589994	R	II	SNORA38	TSS1500	shore	TSS1500-shore	chr6:31587779-31589024
cg05122957	0.105157	0.758183	4.65489	0.000305122	0.0244682	-0.0107248	0.705604	0.810762	0.105157	3	112973542	F	II	BOC	Body	opensea	Body-opensea			TRUE
cg00501876	-0.105709	0.273545	-4.65461	0.000305288	0.0244769	-0.0112767	0.3264	0.220691	-0.105709	3	39193251	R	II	CSRNP1	5'UTR	shore	5'UTR-shore	chr3:39194241-39195359	TRUE
cg09364178	0.148142	0.587653	4.65318	0.000306156	0.0245101	-0.0141443	0.513583	0.661724	0.148142	6	26602900	R	II		IGR	opensea	IGR-opensea
cg17576603	-0.118405	0.609835	-4.65247	0.00030659	0.0245247	-0.0155755	0.669037	0.550633	-0.118405	5	39396455	R	II	DAB2	5'UTR	opensea	5'UTR-opensea			TRUE
cg27300647	0.119393	0.485635	4.65226	0.000306721	0.0245247	-0.0160067	0.425938	0.545331	0.119393	1	62660281	F	II	L1TD1	TSS200	shore	TSS200-shore	chr1:62660555-62660946
cg13247398	0.101252	0.207066	4.65219	0.000306759	0.0245247	-0.0161325	0.15644	0.257692	0.101252	11	46366840	R	I	DGKZ	TSS200	shore	TSS200-shore	chr11:46366876-46367101
cg02394512	0.312797	0.402803	4.65068	0.000307684	0.0245753	-0.0191717	0.246405	0.559202	0.312797	11	94245735	R	I		IGR	island	IGR-island	chr11:94245546-94245891	TRUE	TRUE
cg24496021	-0.121181	0.856955	-4.64636	0.000310334	0.0246792	-0.0278378	0.917545	0.796364	-0.121181	11	72662461	R	II	FCHSD2	Body	opensea	Body-opensea			TRUE
cg16534867	0.119691	0.437875	4.64603	0.000310537	0.0246907	-0.0284964	0.378029	0.49772	0.119691	7	42033899	R	II	GLI3	Body	opensea	Body-opensea			TRUE
cg21612382	0.189212	0.514527	4.6454	0.000310928	0.0247031	-0.029768	0.419922	0.609133	0.189212	3	141080844	R	II	ZBTB38	5'UTR	opensea	5'UTR-opensea			TRUE
cg05976168	0.163853	0.767496	4.64396	0.000311818	0.0247551	-0.0326547	0.68557	0.849423	0.163853	12	611508	R	II	B4GALNT3	Body	opensea	Body-opensea			TRUE
cg02617388	0.114983	0.609219	4.64297	0.000312434	0.0247806	-0.0346484	0.551728	0.66671	0.114983	12	48216620	R	II		IGR	shelf	IGR-shelf	chr12:48213109-48214188
cg16409261	0.118403	0.411689	4.64245	0.000312755	0.0247921	-0.035686	0.352487	0.47089	0.118403	20	61703735	F	I		IGR	island	IGR-island	chr20:61703526-61704022	TRUE
cg13095190	0.142255	0.699184	4.63944	0.000314635	0.0248662	-0.0417411	0.628057	0.770312	0.142255	1	94175352	F	II		IGR	opensea	IGR-opensea			TRUE
cg10527300	-0.132337	0.38322	-4.63881	0.000315027	0.0248831	-0.0429978	0.449389	0.317052	-0.132337	13	110874326	F	I	COL4A1	Body	opensea	Body-opensea			TRUE
cg09005322	-0.122142	0.441888	-4.63824	0.000315383	0.0248929	-0.0441384	0.502959	0.380817	-0.122142	12	25517881	R	II		IGR	opensea	IGR-opensea			TRUE
cg12044693	0.110355	0.583991	4.6367	0.000316353	0.0249177	-0.0472428	0.528814	0.639169	0.110355	6	80873769	F	II	BCKDHB	Body	opensea	Body-opensea			TRUE		rs77135699
cg16185457	0.127331	0.605263	4.63543	0.000317151	0.0249517	-0.0497866	0.541597	0.668928	0.127331	2	28200724	F	II	BRE	Body	opensea	Body-opensea			TRUE
cg02421207	0.109446	0.621152	4.63525	0.000317264	0.024952	-0.0501446	0.566429	0.675875	0.109446	10	64817824	R	II		IGR	opensea	IGR-opensea			TRUE
cg23751035	0.108131	0.580299	4.63348	0.000318385	0.0250143	-0.0537069	0.526233	0.634365	0.108131	7	29518387	R	II	CHN2	TSS1500	opensea	TSS1500-opensea
cg04098263	0.160193	0.758968	4.6334	0.000318437	0.0250143	-0.0538726	0.678871	0.839064	0.160193	6	2382649	F	II		IGR	opensea	IGR-opensea					rs6915741
cg00013899	-0.132016	0.655904	-4.63249	0.00031901	0.0250371	-0.0556882	0.721911	0.589896	-0.132016	1	64992433	R	II	CACHD1	Body	opensea	Body-opensea			TRUE
cg13191951	0.114786	0.598701	4.63241	0.000319059	0.0250371	-0.0558458	0.541308	0.656094	0.114786	15	71685353	R	II	THSD4	Body	opensea	Body-opensea			TRUE
cg17063632	0.123422	0.552233	4.63194	0.000319361	0.0250516	-0.0567985	0.490522	0.613944	0.123422	6	43989118	R	II		IGR	opensea	IGR-opensea			TRUE
cg17384323	0.101428	0.684055	4.6312	0.000319832	0.025079	-0.0582882	0.633341	0.734769	0.101428	4	169242366	R	II		IGR	shelf	IGR-shelf	chr4:169239549-169239824
cg06707663	0.100208	0.436201	4.63089	0.000320029	0.025086	-0.0589091	0.386097	0.486306	0.100208	11	61381267	F	II	RPLP0P2	TSS1500	opensea	TSS1500-opensea					rs79936953
cg26090406	-0.120168	0.543533	-4.62969	0.000320792	0.0251086	-0.0613168	0.603617	0.483449	-0.120168	13	110937644	F	I	COL4A1	Body	opensea	Body-opensea			TRUE		rs61964262
cg07480653	0.121901	0.732273	4.62957	0.000320871	0.0251086	-0.0615628	0.671323	0.793224	0.121901	17	39868082	F	II	GAST	TSS1500	opensea	TSS1500-opensea
cg10669386	0.120016	0.741296	4.62946	0.000320941	0.0251086	-0.0617845	0.681288	0.801304	0.120016	7	123295821	R	II	LMOD2	TSS200	opensea	TSS200-opensea
cg25087341	0.116272	0.581714	4.62939	0.000320985	0.0251086	-0.0619235	0.523578	0.63985	0.116272	3	111487811	R	II	PHLDB2	5'UTR	opensea	5'UTR-opensea			TRUE
cg14313833	0.110605	0.748828	4.6288	0.000321358	0.0251098	-0.063096	0.693525	0.80413	0.110605	9	107666037	F	II	ABCA1	5'UTR	opensea	5'UTR-opensea			TRUE	low-CpG:106705798-106706006
cg27022558	0.124863	0.61406	4.62862	0.000321474	0.0251133	-0.0634622	0.551628	0.676491	0.124863	11	64141041	R	II		IGR	shelf	IGR-shelf	chr11:64136814-64138187	TRUE
cg12336540	0.115049	0.654074	4.62659	0.000322778	0.0251787	-0.0675506	0.59655	0.711598	0.115049	1	167598993	F	II	RCSD1	TSS1500	shore	TSS1500-shore	chr1:167599464-167599839		TRUE		rs12046963
cg26909613	0.195403	0.749257	4.62513	0.000323717	0.0252202	-0.0704832	0.651555	0.846959	0.195403	7	8124545	R	II	GLCCI1	Body	opensea	Body-opensea			TRUE
cg19084794	0.148957	0.671387	4.62376	0.000324597	0.02525	-0.0732259	0.596908	0.745866	0.148957	8	96086565	F	II		IGR	shore	IGR-shore	chr8:96085269-96085747
cg02274788	0.104573	0.426659	4.62339	0.000324836	0.02525	-0.0739669	0.374372	0.478946	0.104573	1	68232457	R	II	GNG12	5'UTR	opensea	5'UTR-opensea			TRUE
cg03516335	0.190839	0.349559	4.62338	0.000324847	0.02525	-0.0740032	0.25414	0.444979	0.190839	11	72122809	R	II	CLPB	Body	opensea	Body-opensea			TRUE
cg02754929	0.120162	0.475372	4.62045	0.000326742	0.0252995	-0.0798759	0.415291	0.535452	0.120162	4	3295736	F	II		IGR	shore	IGR-shore	chr4:3293714-3294595				rs10529360
cg19746186	0.100774	0.684938	4.61739	0.000328739	0.0253822	-0.0860291	0.634551	0.735325	0.100774	1	60158474	R	II	FGGY	Body	opensea	Body-opensea		TRUE	TRUE
cg18285377	0.113436	0.740555	4.61729	0.000328804	0.0253822	-0.0862313	0.683837	0.797273	0.113436	1	11025263	F	II	C1orf127	TSS1500	opensea	TSS1500-opensea					rs34864652
cg25603927	0.123905	0.168806	4.61601	0.000329641	0.0254189	-0.0887981	0.106853	0.230758	0.123905	10	99185264	R	II	PGAM1	TSS1500	shore	TSS1500-shore	chr10:99185778-99186294
cg16228077	0.104707	0.564321	4.61377	0.000331116	0.0254702	-0.093306	0.511967	0.616675	0.104707	2	206927623	R	II	INO80D	Body	opensea	Body-opensea			TRUE
cg13474090	0.105287	0.753845	4.61257	0.000331907	0.0254891	-0.0957141	0.701201	0.806488	0.105287	9	92027541	F	II	SEMA4D	5'UTR	opensea	5'UTR-opensea			TRUE			rs9410478
cg16434365	0.113253	0.722199	4.61249	0.000331959	0.0254891	-0.0958731	0.665572	0.778825	0.113253	16	1435045	F	II		IGR	shore	IGR-shore	chr16:1435193-1435583
cg03579821	0.105182	0.80221	4.61139	0.000332691	0.0255261	-0.0980989	0.749618	0.854801	0.105182	10	79524632	F	II		IGR	opensea	IGR-opensea			TRUE
cg18970929	0.112982	0.69575	4.61034	0.000333385	0.0255606	-0.100203	0.639259	0.752241	0.112982	11	26291263	F	II		IGR	opensea	IGR-opensea			TRUE
cg12476242	0.101543	0.716779	4.60906	0.000334239	0.0255888	-0.102786	0.666008	0.767551	0.101543	3	127813395	F	II	RUVBL1	Body	opensea	Body-opensea			TRUE
cg07400751	0.181671	0.703815	4.60764	0.000335185	0.0256147	-0.105641	0.612979	0.79465	0.181671	11	70958230	F	II		IGR	shelf	IGR-shelf	chr11:70962173-70964161				rs75264193	rs77899008
cg07791490	0.154883	0.526039	4.60692	0.000335666	0.0256374	-0.107086	0.448598	0.603481	0.154883	8	99949391	R	II		IGR	shelf	IGR-shelf	chr8:99952020-99954686
cg06542614	0.12967	0.532017	4.60656	0.000335903	0.0256451	-0.107799	0.467182	0.596852	0.12967	10	97051255	F	II	PDLIM1	TSS1500	shore	TSS1500-shore	chr10:97050185-97051124
cg07890238	0.131912	0.7573	4.60492	0.000337004	0.025679	-0.111105	0.691343	0.823256	0.131912	8	8182454	R	II	PRAGMIN	Body	opensea	Body-opensea			TRUE
cg14546115	0.10999	0.600612	4.603	0.000338291	0.025747	-0.114953	0.545617	0.655607	0.10999	6	20817980	F	II	CDKAL1	Body	opensea	Body-opensea			TRUE			rs9366360
cg01883051	0.169202	0.67494	4.60155	0.000339271	0.0257939	-0.117872	0.590339	0.759541	0.169202	6	67178610	F	II		IGR	opensea	IGR-opensea			TRUE			rs79827453
cg14269096	0.175261	0.262507	4.60108	0.000339589	0.0257939	-0.118819	0.174877	0.350138	0.175261	18	56532433	R	II	ZNF532	5'UTR	shore	5'UTR-shore	chr18:56530395-56531288	TRUE	TRUE		rs76858418
cg10164191	0.139807	0.6523	4.60103	0.000339626	0.0257939	-0.11893	0.582396	0.722203	0.139807	X	66763521	F	II	AR	TSS1500	shore	TSS1500-shore	chrX:66763684-66764077
cg23101551	-0.118594	0.539432	-4.60052	0.000339971	0.025804	-0.119956	0.598729	0.480135	-0.118594	12	69401704	R	II		IGR	opensea	IGR-opensea			TRUE
cg05669832	-0.108269	0.384731	-4.59999	0.00034033	0.0258156	-0.121021	0.438865	0.330596	-0.108269	2	37545562	F	II	PRKD3	TSS1500	opensea	TSS1500-opensea			TRUE		rs35752539
cg19621753	0.119479	0.308698	4.59934	0.00034077	0.0258164	-0.122325	0.248958	0.368437	0.119479	18	56937772	R	II	RAX	Body	shore	Body-shore	chr18:56939624-56941540		TRUE
cg01526748	0.177602	0.436137	4.598	0.000341683	0.0258294	-0.125027	0.347336	0.524938	0.177602	3	191930926	R	II	FGF12	Body	opensea	Body-opensea			TRUE
cg09537568	0.143869	0.564098	4.59749	0.000342025	0.025837	-0.126036	0.492164	0.636033	0.143869	4	85778686	R	II	WDFY3	Body	opensea	Body-opensea			TRUE
cg18200075	0.128607	0.551213	4.59709	0.000342301	0.0258393	-0.126851	0.486909	0.615517	0.128607	1	161706293	R	II		IGR	opensea	IGR-opensea			TRUE
cg13289202	0.100099	0.608671	4.59688	0.000342446	0.0258456	-0.127278	0.558622	0.658721	0.100099	11	34322226	R	II	ABTB2	Body	opensea	Body-opensea			TRUE
cg17675150	0.13098	0.854845	4.59666	0.000342596	0.0258503	-0.127722	0.789355	0.920334	0.13098	18	56529784	F	II	ZNF532	TSS1500	shore	TSS1500-shore	chr18:56530395-56531288
cg10294253	0.159576	0.301531	4.59176	0.000345955	0.0259614	-0.137571	0.221743	0.381319	0.159576	15	30181321	R	II		IGR	opensea	IGR-opensea			TRUE
cg11395954	0.137224	0.624326	4.59113	0.00034639	0.0259802	-0.13884	0.555714	0.692938	0.137224	11	133658009	F	II		IGR	opensea	IGR-opensea			TRUE		rs36075148
cg15854125	0.107198	0.650904	4.59088	0.000346559	0.0259836	-0.139332	0.597305	0.704503	0.107198	8	30241197	F	II	RBPMS	TSS1500	shore	TSS1500-shore	chr8:30241416-30242878
cg23082281	0.180221	0.27753	4.59018	0.000347048	0.0259925	-0.140757	0.187419	0.36764	0.180221	1	213032677	F	II	LQK1	TSS1500	shore	TSS1500-shore	chr1:213031359-213032119				rs34245161
cg05388545	-0.142924	0.569145	-4.58839	0.000348287	0.0260199	-0.144353	0.640607	0.497682	-0.142924	17	29152968	F	II	CRLF3	TSS1500	shore	TSS1500-shore	chr17:29151481-29151901
cg21915368	0.108809	0.660578	4.58806	0.000348513	0.0260281	-0.14501	0.606174	0.714983	0.108809	1	60166962	F	II	FGGY	Body	opensea	Body-opensea			TRUE
cg27508055	0.120769	0.644643	4.5857	0.000350156	0.0261247	-0.149758	0.584259	0.705028	0.120769	2	19286187	F	II		IGR	opensea	IGR-opensea			TRUE		rs10207619
cg22413056	0.105596	0.32004	4.5854	0.000350365	0.0261247	-0.15036	0.267243	0.372838	0.105596	6	30650202	R	II	KIAA1949	Body	opensea	Body-opensea		TRUE
cg15081402	0.158502	0.620208	4.58535	0.000350402	0.0261247	-0.150465	0.540957	0.699459	0.158502	3	64433470	F	II		IGR	shelf	IGR-shelf	chr3:64430585-64431192					rs78027469
cg15269394	-0.122999	0.358522	-4.58486	0.000350743	0.0261389	-0.151448	0.420021	0.297022	-0.122999	17	40672083	F	II	ATP6V0A1	Body	opensea	Body-opensea		TRUE	TRUE
cg12884495	-0.117459	0.418016	-4.58462	0.000350917	0.0261458	-0.151948	0.476745	0.359286	-0.117459	17	73842017	F	II	WBP2	3'UTR	opensea	3'UTR-opensea			TRUE		rs1044286
cg14898147	0.135691	0.530271	4.58455	0.00035096	0.0261458	-0.152071	0.462425	0.598116	0.135691	12	57089626	F	II		IGR	opensea	IGR-opensea			TRUE
cg04403415	0.1173	0.65789	4.5812	0.000353312	0.0262234	-0.158814	0.59924	0.71654	0.1173	12	124991087	F	II	NCOR2	5'UTR	opensea	5'UTR-opensea		TRUE			rs5801558
cg06663149	0.125909	0.350743	4.57953	0.000354491	0.026269	-0.162178	0.287788	0.413697	0.125909	4	41457558	F	II	LIMCH1	Body	opensea	Body-opensea			TRUE
cg23778363	-0.127305	0.349417	-4.57909	0.000354804	0.0262694	-0.163068	0.41307	0.285765	-0.127305	6	106546038	F	II	PRDM1	Body	opensea	Body-opensea			TRUE		rs35429471
cg20224867	0.133064	0.845268	4.57877	0.00035503	0.0262769	-0.163711	0.778736	0.9118	0.133064	3	41289931	F	II	ULK4	Body	opensea	Body-opensea			TRUE
cg01494441	0.142286	0.641965	4.57741	0.000355991	0.0263203	-0.16644	0.570822	0.713109	0.142286	2	182523146	R	II	CERKL	TSS1500	shore	TSS1500-shore	chr2:182521221-182521927
cg17467968	0.105026	0.482266	4.5766	0.000356572	0.026348	-0.168085	0.429753	0.534778	0.105026	15	77711092	R	II		IGR	shore	IGR-shore	chr15:77711625-77712910
cg12406559	0.137766	0.642911	4.57274	0.000359328	0.0264693	-0.175857	0.574028	0.711794	0.137766	18	56530302	F	II	ZNF532	1stExon	shore	1stExon-shore	chr18:56530395-56531288	TRUE			rs78030796
cg17400812	0.207522	0.664436	4.57134	0.00036033	0.0265091	-0.178668	0.560675	0.768198	0.207522	7	41854825	R	II		IGR	opensea	IGR-opensea			TRUE			rs62441487
cg22457668	0.106635	0.736679	4.57067	0.000360811	0.0265166	-0.180014	0.683362	0.789996	0.106635	8	1318052	R	I		IGR	shelf	IGR-shelf	chr8:1321232-1321638
cg14013053	0.195035	0.660488	4.56827	0.000362544	0.0265751	-0.184851	0.56297	0.758005	0.195035	2	100615071	R	II	AFF3	Body	opensea	Body-opensea			TRUE
cg00364287	0.119919	0.531241	4.56775	0.000362924	0.0265751	-0.185908	0.471281	0.5912	0.119919	12	121570752	R	I	P2RX7	5'UTR	opensea	5'UTR-opensea		TRUE	TRUE	low-CpG:120055038-120055141
cg12750917	0.100389	0.441333	4.56771	0.00036295	0.0265751	-0.185981	0.391139	0.491528	0.100389	1	198204074	F	II	NEK7	Body	opensea	Body-opensea			TRUE		rs76941617
cg23847017	-0.127276	0.180981	-4.56688	0.000363555	0.0266037	-0.187661	0.244619	0.117343	-0.127276	1	28764854	F	II	PHACTR4	1stExon	opensea	1stExon-opensea		TRUE
cg03781748	-0.15575	0.265721	-4.56411	0.000365568	0.0266453	-0.193235	0.343596	0.187846	-0.15575	10	32229887	R	II		IGR	opensea	IGR-opensea			TRUE
cg03132824	0.199769	0.431024	4.56376	0.000365822	0.0266491	-0.193936	0.33114	0.530908	0.199769	4	3373006	R	I	RGS12	Body	shore	Body-shore	chr4:3374733-3374998		TRUE
cg23819669	0.118061	0.706178	4.56341	0.000366078	0.0266562	-0.194642	0.647147	0.765208	0.118061	3	128187274	R	I	DNAJB8	TSS1500	opensea	TSS1500-opensea
cg06719445	0.104559	0.570326	4.56318	0.000366249	0.0266571	-0.195113	0.518046	0.622606	0.104559	14	89925468	F	II	FOXN3	5'UTR	opensea	5'UTR-opensea			TRUE
cg07268332	0.128992	0.669333	4.56208	0.00036705	0.0267008	-0.197318	0.604837	0.733829	0.128992	11	10476494	F	II	AMPD3	TSS200	shelf	TSS200-shelf	chr11:10472000-10472857	TRUE			rs10709823
cg13050716	0.108926	0.315262	4.56192	0.000367166	0.0267008	-0.197637	0.260799	0.369725	0.108926	3	127416580	F	II	MGLL	Body	opensea	Body-opensea		TRUE	TRUE
cg22855274	0.104947	0.743294	4.56074	0.000368032	0.0267545	-0.200015	0.690821	0.795768	0.104947	2	64485830	F	II		IGR	opensea	IGR-opensea			TRUE
cg14241731	0.168425	0.242295	4.56038	0.000368297	0.0267619	-0.20074	0.158082	0.326507	0.168425	13	28960733	R	II	FLT1	Body	opensea	Body-opensea			TRUE
cg07900344	0.143602	0.361395	4.55939	0.000369028	0.0267768	-0.202742	0.289594	0.433196	0.143602	2	6305776	R	II		IGR	opensea	IGR-opensea			TRUE
cg05384724	0.102672	0.149065	4.55931	0.000369086	0.0267768	-0.2029	0.0977293	0.200401	0.102672	12	124155451	R	II	TCTN2	TSS1500	shore	TSS1500-shore	chr12:124155578-124156171
cg11893127	0.147595	0.523501	4.5584	0.000369758	0.0267966	-0.204737	0.449703	0.597299	0.147595	12	131057342	F	II		IGR	opensea	IGR-opensea
cg18061711	-0.143053	0.624559	-4.55664	0.00037106	0.0268656	-0.208283	0.696086	0.553032	-0.143053	5	71683955	F	II		IGR	opensea	IGR-opensea		TRUE	TRUE			rs73102491
cg24947286	0.133183	0.837047	4.5564	0.000371239	0.0268711	-0.208771	0.770456	0.903639	0.133183	5	65951141	F	II	MAST4	Body	opensea	Body-opensea			TRUE
cg17082405	-0.10523	0.821332	-4.55595	0.000371571	0.0268755	-0.209671	0.873947	0.768717	-0.10523	8	145033328	F	II	PLEC1	Body	opensea	Body-opensea			TRUE
cg05651820	0.131756	0.383704	4.55594	0.000371576	0.0268755	-0.209685	0.317827	0.449582	0.131756	3	122764562	F	I		IGR	opensea	IGR-opensea			TRUE
cg05514680	0.116397	0.602898	4.55508	0.000372217	0.0268989	-0.211426	0.5447	0.661097	0.116397	17	7461556	R	II	TNFSF12-TNFSF13	Body	shelf	Body-shelf	chr17:7464666-7465823	TRUE
cg07180125	0.145727	0.582543	4.55422	0.000372856	0.0269099	-0.213155	0.50968	0.655406	0.145727	10	114039492	F	II		IGR	opensea	IGR-opensea			TRUE
cg24526899	0.111901	0.142339	4.55344	0.000373436	0.0269438	-0.214725	0.086388	0.198289	0.111901	14	54424149	F	II	BMP4	TSS1500	shore	TSS1500-shore	chr14:54420184-54422958
cg22974463	0.352924	0.346774	4.55308	0.000373708	0.0269529	-0.21546	0.170312	0.523236	0.352924	11	94245440	R	II		IGR	shore	IGR-shore	chr11:94245546-94245891		TRUE
cg19942383	0.103542	0.508588	4.55239	0.000374219	0.0269735	-0.216838	0.456817	0.560359	0.103542	3	42979226	R	II		IGR	shore	IGR-shore	chr3:42977830-42978090
cg05318516	0.115813	0.42334	4.55235	0.00037425	0.0269735	-0.216923	0.365434	0.481247	0.115813	8	37412156	R	II		IGR	opensea	IGR-opensea			TRUE
cg03479209	0.218733	0.486346	4.55128	0.000375051	0.0270034	-0.219078	0.37698	0.595713	0.218733	3	58020999	F	II	FLNB	Body	opensea	Body-opensea			TRUE
cg21168902	-0.121892	0.372241	-4.54488	0.000379879	0.027185	-0.231987	0.433187	0.311295	-0.121892	1	198626733	R	II	PTPRC	Body	opensea	Body-opensea			TRUE
cg15109966	0.152731	0.734199	4.53789	0.000385215	0.0273677	-0.246061	0.657834	0.810564	0.152731	10	35715523	F	II	CCNY	Body	opensea	Body-opensea			TRUE		rs17593103
cg04101194	0.118056	0.396211	4.53785	0.000385248	0.0273677	-0.246147	0.337183	0.455239	0.118056	4	25656865	R	II	SLC34A2	TSS1500	shore	TSS1500-shore	chr4:25657119-25657547	TRUE	TRUE
cg26902557	0.104679	0.174531	4.53756	0.000385475	0.0273746	-0.24674	0.122191	0.22687	0.104679	11	1585852	F	II	DUSP8	Body	opensea	Body-opensea		TRUE	TRUE
cg07211212	0.209449	0.409196	4.53624	0.000386494	0.0274053	-0.249405	0.304472	0.513921	0.209449	20	55200146	R	I		IGR	shore	IGR-shore	chr20:55200279-55206789
cg22950831	-0.137951	0.26425	-4.53573	0.000386888	0.0274194	-0.250431	0.333226	0.195274	-0.137951	10	128590997	F	II		IGR	shelf	IGR-shelf	chr10:128593609-128595048	TRUE			rs9423005
cg00977842	0.114033	0.846163	4.53464	0.000387727	0.0274557	-0.252617	0.789147	0.90318	0.114033	10	82050793	F	II	MAT1A	TSS1500	opensea	TSS1500-opensea					rs3762099
cg10986455	0.128671	0.653468	4.53152	0.000390151	0.0275351	-0.258906	0.589132	0.717803	0.128671	X	69642862	F	I	GDPD2	TSS200	opensea	TSS200-opensea
cg24598190	0.15539	0.635283	4.53152	0.000390157	0.0275351	-0.25892	0.557587	0.712978	0.15539	1	56829308	F	II		IGR	opensea	IGR-opensea			TRUE
cg23050394	0.107247	0.535792	4.52989	0.000391428	0.0275973	-0.262201	0.482168	0.589415	0.107247	5	123599727	F	II		IGR	opensea	IGR-opensea			TRUE
cg20305578	-0.105707	0.338067	-4.52989	0.000391431	0.0275973	-0.26221	0.39092	0.285213	-0.105707	8	1908301	F	II		IGR	opensea	IGR-opensea
cg15811371	0.188404	0.540614	4.52933	0.00039187	0.0276143	-0.263339	0.446412	0.634816	0.188404	19	9093198	R	II	MUC16	TSS1500	opensea	TSS1500-opensea
cg12293095	-0.129618	0.575266	-4.52882	0.000392264	0.0276247	-0.264353	0.640075	0.510457	-0.129618	3	132324571	R	II	ACAD11	Body	opensea	Body-opensea			TRUE
cg03896542	0.10835	0.772892	4.52872	0.000392343	0.0276247	-0.264559	0.718717	0.827067	0.10835	16	56378687	R	II	GNAO1	Body	opensea	Body-opensea		TRUE
cg02506908	-0.138534	0.516717	-4.52737	0.000393403	0.027664	-0.267279	0.585984	0.44745	-0.138534	12	122297408	F	II	HPD	TSS1500	opensea	TSS1500-opensea		TRUE	TRUE
cg22427797	0.144068	0.787005	4.52674	0.000393898	0.0276831	-0.268549	0.714971	0.859039	0.144068	1	214740759	R	II		IGR	opensea	IGR-opensea			TRUE
cg01426808	0.135255	0.804209	4.52636	0.000394201	0.0276931	-0.269325	0.736582	0.871836	0.135255	8	117487124	F	II		IGR	opensea	IGR-opensea			TRUE
cg21038780	-0.130733	0.75803	-4.52554	0.000394848	0.0277211	-0.270978	0.823397	0.692664	-0.130733	5	167780864	R	II	WWC1	Body	opensea	Body-opensea			TRUE
cg14927519	0.117832	0.528273	4.5251	0.000395196	0.0277326	-0.271867	0.469357	0.587189	0.117832	7	28450696	R	II	CREB5	TSS1500	shore	TSS1500-shore	chr7:28448716-28450028
cg15476723	0.160065	0.395044	4.5226	0.000397174	0.0277926	-0.276903	0.315011	0.475076	0.160065	19	48116808	F	II	GLTSCR1	5'UTR	shelf	5'UTR-shelf	chr19:48111351-48113685	TRUE	TRUE		rs73940900	rs73940899
cg06975218	0.182637	0.647241	4.52176	0.00039784	0.0278071	-0.278592	0.555923	0.73856	0.182637	4	78941960	F	II		IGR	opensea	IGR-opensea			TRUE			rs72872608
cg03506656	-0.118139	0.626016	-4.52176	0.000397844	0.0278071	-0.278603	0.685085	0.566946	-0.118139	2	163097510	F	II	FAP	Body	opensea	Body-opensea			TRUE
cg01589587	0.12056	0.263641	4.52144	0.000398097	0.0278106	-0.279245	0.203361	0.323921	0.12056	14	76002440	F	II	BATF	Body	opensea	Body-opensea		TRUE	TRUE		rs28546995
cg03067403	0.111572	0.325485	4.5214	0.000398131	0.0278106	-0.27933	0.269699	0.381271	0.111572	11	8954598	R	II	C11orf16	TSS200	opensea	TSS200-opensea			TRUE
cg14535274	-0.130143	0.572909	-4.52051	0.000398836	0.0278321	-0.281117	0.637981	0.507838	-0.130143	3	121151186	R	II	POLQ	Body	opensea	Body-opensea			TRUE
cg08106792	-0.114576	0.441363	-4.5202	0.000399089	0.0278321	-0.281754	0.498651	0.384075	-0.114576	1	153509323	R	II	S100A6	TSS1500	shore	TSS1500-shore	chr1:153508424-153508840
cg03053456	-0.118653	0.275396	-4.52015	0.000399127	0.0278321	-0.281852	0.334722	0.21607	-0.118653	5	72525356	R	II		IGR	shore	IGR-shore	chr5:72526203-72526497
cg15828842	0.136119	0.61225	4.5199	0.000399326	0.0278367	-0.282353	0.544191	0.680309	0.136119	10	34527486	R	II	PARD3	Body	opensea	Body-opensea			TRUE
cg17014095	0.165122	0.803272	4.51962	0.000399551	0.0278452	-0.282921	0.720711	0.885833	0.165122	1	114038217	R	II	MAGI3	Body	opensea	Body-opensea			TRUE
cg01761552	-0.111727	0.798984	-4.51916	0.000399918	0.0278462	-0.283848	0.854847	0.74312	-0.111727	16	81634971	F	II	CMIP	Body	opensea	Body-opensea		TRUE	TRUE		rs74031217
cg00453717	-0.159515	0.653102	-4.51859	0.000400376	0.0278526	-0.285003	0.732859	0.573344	-0.159515	11	74344629	F	II	POLD3	Body	opensea	Body-opensea			TRUE
cg22472608	0.122069	0.666166	4.51839	0.00040053	0.0278536	-0.28539	0.605131	0.7272	0.122069	5	1891194	R	II		IGR	shelf	IGR-shelf	chr5:1881924-1887743
cg04515311	-0.120651	0.708053	-4.51652	0.000402036	0.0279054	-0.289176	0.768378	0.647727	-0.120651	16	4822815	F	II		IGR	shelf	IGR-shelf	chr16:4818667-4819033
cg00951869	0.107098	0.469609	4.5164	0.000402129	0.0279054	-0.28941	0.41606	0.523158	0.107098	14	24805349	F	II	ADCY4	TSS1500	shore	TSS1500-shore	chr14:24803678-24804353
cg23412639	0.19179	0.694611	4.51602	0.000402437	0.0279141	-0.290182	0.598716	0.790506	0.19179	4	158929577	R	II		IGR	opensea	IGR-opensea			TRUE
cg05377949	0.102561	0.632868	4.51492	0.000403319	0.02793	-0.29239	0.581587	0.684149	0.102561	3	127951287	F	II	EEFSEC	Body	opensea	Body-opensea			TRUE		rs10433408
cg20386109	0.127384	0.63892	4.51275	0.000405081	0.0279911	-0.296788	0.575228	0.702612	0.127384	3	150136534	F	II	TSC22D2	Body	opensea	Body-opensea			TRUE
cg05920909	0.106009	0.567948	4.51154	0.00040606	0.0280229	-0.299221	0.514944	0.620953	0.106009	1	197889693	R	II	LHX9	Body	shore	Body-shore	chr1:197890478-197890824		TRUE
cg17951244	0.10307	0.660277	4.50987	0.000407415	0.0280618	-0.302582	0.608742	0.711812	0.10307	1	52158161	F	II	OSBPL9	Body	opensea	Body-opensea			TRUE
cg17116091	-0.109719	0.741731	-4.50869	0.000408379	0.0280912	-0.304966	0.796591	0.686872	-0.109719	10	114807157	R	II	TCF7L2	Body	opensea	Body-opensea			TRUE
cg26460483	-0.140311	0.204099	-4.50843	0.000408596	0.0280912	-0.305502	0.274255	0.133943	-0.140311	7	97914016	R	II	BRI3	Body	shelf	Body-shelf	chr7:97910459-97911618	TRUE
cg04035064	0.16321	0.513953	4.50556	0.000410949	0.0281709	-0.311293	0.432348	0.595558	0.16321	2	46243113	R	II	PRKCE	Body	opensea	Body-opensea			TRUE
cg08473764	-0.150843	0.445805	-4.50492	0.000411474	0.0281885	-0.312581	0.521227	0.370384	-0.150843	1	231155983	F	II	MIR1182	TSS1500	opensea	TSS1500-opensea			TRUE		rs10864654
cg08842287	-0.182341	0.446228	-4.50436	0.000411939	0.0282157	-0.313718	0.537399	0.355057	-0.182341	16	3747018	F	II	TRAP1	Body	opensea	Body-opensea			TRUE		rs1635404
cg02518895	0.101153	0.5937	4.50426	0.000412022	0.0282169	-0.313922	0.543123	0.644276	0.101153	2	99918603	R	II	LYG1	TSS1500	opensea	TSS1500-opensea						rs56925995
cg23817981	0.114066	0.496034	4.50379	0.000412408	0.0282341	-0.314868	0.439	0.553067	0.114066	3	32993063	F	II	CCR4	TSS200	opensea	TSS200-opensea					rs74340335
cg18085435	0.103693	0.695383	4.50366	0.000412516	0.0282369	-0.31513	0.643536	0.747229	0.103693	18	55400167	R	II	ATP8B1	TSS1500	opensea	TSS1500-opensea
cg03813964	0.159442	0.469504	4.50139	0.000414392	0.0283009	-0.319707	0.389783	0.549225	0.159442	2	24709887	F	II		IGR	shelf	IGR-shelf	chr2:24713710-24715168
cg26673151	-0.131274	0.372862	-4.50034	0.000415265	0.0283368	-0.32183	0.438499	0.307225	-0.131274	17	37887607	F	II	C17orf37	TSS1500	shore	TSS1500-shore	chr17:37886455-37887010				rs8066807
cg20555778	-0.160445	0.619001	-4.50005	0.000415506	0.0283401	-0.322413	0.699223	0.538779	-0.160445	9	97572199	R	II	MIR2278	TSS200	opensea	TSS200-opensea
cg18976542	0.11704	0.672747	4.49933	0.000416109	0.0283604	-0.323877	0.614227	0.731267	0.11704	14	50689394	F	II	SOS2	Body	opensea	Body-opensea			TRUE		rs76476752
cg14906103	-0.163916	0.558276	-4.49643	0.00041853	0.028468	-0.329727	0.640234	0.476318	-0.163916	4	41936852	F	II	TMEM33	TSS1500	shore	TSS1500-shore	chr4:41937098-41937624				rs79121617
cg00908004	-0.113461	0.411692	-4.49286	0.000421528	0.0285749	-0.336924	0.468423	0.354962	-0.113461	13	113832595	R	II	PCID2	Body	opensea	Body-opensea		TRUE
cg21518268	0.104373	0.69734	4.49178	0.000422444	0.0286238	-0.339114	0.645153	0.749526	0.104373	8	81124468	F	II		IGR	opensea	IGR-opensea			TRUE
cg14501548	0.127461	0.729155	4.49143	0.000422744	0.0286238	-0.339829	0.665424	0.792885	0.127461	5	115705963	F	II		IGR	opensea	IGR-opensea			TRUE
cg04768557	0.186802	0.424372	4.49141	0.000422755	0.0286238	-0.339854	0.33097	0.517773	0.186802	10	62114363	R	II	ANK3	Body	opensea	Body-opensea			TRUE			rs77721582
cg09023965	0.188705	0.620244	4.48825	0.00042544	0.028729	-0.34624	0.525891	0.714596	0.188705	2	72447698	R	II	EXOC6B	Body	opensea	Body-opensea			TRUE
cg18700744	-0.151584	0.315645	-4.48721	0.000426326	0.0287625	-0.348336	0.391437	0.239853	-0.151584	12	112534559	R	II	NAA25	Body	opensea	Body-opensea		TRUE	TRUE
cg25961816	0.118093	0.371336	4.48533	0.000427938	0.0288268	-0.352141	0.312289	0.430383	0.118093	6	121972775	R	II		IGR	opensea	IGR-opensea			TRUE
cg19145218	-0.108327	0.355484	-4.48532	0.000427945	0.0288268	-0.352159	0.409647	0.30132	-0.108327	20	749336	R	II	C20orf54	TSS200	opensea	TSS200-opensea		TRUE
cg24011511	0.112234	0.285637	4.48471	0.000428471	0.0288457	-0.353397	0.22952	0.341755	0.112234	6	130288563	R	II		IGR	opensea	IGR-opensea			TRUE
cg21498475	-0.120924	0.254186	-4.4799	0.000432619	0.0290235	-0.363111	0.314648	0.193724	-0.120924	12	113737469	F	II	SLC24A6	3'UTR	opensea	3'UTR-opensea			TRUE
cg13493546	-0.136159	0.436493	-4.47945	0.000433014	0.0290351	-0.364031	0.504573	0.368414	-0.136159	9	91390547	F	II		IGR	opensea	IGR-opensea			TRUE
cg14475840	-0.125435	0.445333	-4.47839	0.000433934	0.0290693	-0.366172	0.508051	0.382616	-0.125435	9	103191817	F	II	C9orf30	5'UTR	shore	5'UTR-shore	chr9:103189776-103190020	TRUE
cg01700124	0.132378	0.819386	4.47676	0.000435353	0.0291319	-0.369463	0.753197	0.885575	0.132378	3	193620954	R	II		IGR	opensea	IGR-opensea			TRUE		rs76127667
cg21617694	0.143642	0.317221	4.47455	0.000437285	0.0292147	-0.373927	0.2454	0.389042	0.143642	6	28715138	R	II		IGR	opensea	IGR-opensea
cg26159832	0.131976	0.556469	4.47378	0.000437962	0.0292367	-0.375486	0.490481	0.622457	0.131976	14	103822211	F	II		IGR	opensea	IGR-opensea			TRUE
cg00281048	0.168376	0.550402	4.47265	0.000438956	0.0292573	-0.377772	0.466214	0.634591	0.168376	4	80573233	R	II		IGR	opensea	IGR-opensea			TRUE
cg18278943	0.121903	0.597817	4.47189	0.000439623	0.0292779	-0.379302	0.536866	0.658768	0.121903	3	57739651	R	II		IGR	shelf	IGR-shelf	chr3:57741925-57742990
cg04369588	0.114082	0.471802	4.47081	0.000440576	0.029305	-0.381487	0.414761	0.528842	0.114082	14	102964872	F	II	TECPR2	3'UTR	opensea	3'UTR-opensea		TRUE
cg16425038	0.147504	0.424057	4.46978	0.000441483	0.0293275	-0.383559	0.350305	0.49781	0.147504	14	24641194	F	I	REC8	TSS200	island	TSS200-island	chr14:24641053-24642220	TRUE		high-CpG:23710910-23711161	rs1043116
cg14569776	0.123973	0.677237	4.46926	0.000441949	0.0293422	-0.384622	0.61525	0.739223	0.123973	19	46974275	F	II	PNMAL1	Body	shore	Body-shore	chr19:46974557-46975073	TRUE	TRUE		rs12978825
cg17142432	0.128136	0.621643	4.46665	0.00044426	0.0294221	-0.389879	0.557576	0.685711	0.128136	11	70559104	R	I	SHANK2	Body	opensea	Body-opensea			TRUE
cg03950253	-0.152966	0.488597	-4.46645	0.000444438	0.0294221	-0.390284	0.56508	0.412115	-0.152966	7	134345856	R	II	BPGM	5'UTR	opensea	5'UTR-opensea			TRUE
cg08418670	-0.154779	0.312595	-4.46637	0.000444511	0.0294221	-0.39045	0.389984	0.235205	-0.154779	19	4374567	F	I	SH3GL1	Body	shelf	Body-shelf	chr19:4371729-4371952	TRUE
cg01015354	0.105868	0.678944	4.46614	0.000444719	0.029423	-0.390921	0.626009	0.731878	0.105868	17	21823975	F	II	FAM27L	TSS1500	opensea	TSS1500-opensea
cg24162251	0.112414	0.293157	4.46514	0.000445611	0.0294583	-0.39294	0.23695	0.349364	0.112414	14	32420205	F	II		IGR	opensea	IGR-opensea		TRUE	TRUE
cg17515024	0.128852	0.269625	4.46499	0.000445745	0.0294618	-0.393244	0.205199	0.334051	0.128852	1	228644963	F	II	HIST3H2BB	TSS1500	shore	TSS1500-shore	chr1:228645196-228646434				rs72763954
cg08457421	0.118077	0.388694	4.46329	0.00044727	0.0295116	-0.396686	0.329656	0.447733	0.118077	22	31536431	R	I	PLA2G3	5'UTR	opensea	5'UTR-opensea		TRUE	TRUE
cg10735015	0.10505	0.70638	4.46262	0.000447872	0.0295282	-0.398041	0.653855	0.758905	0.10505	6	143928643	R	II	PHACTR2	TSS1500	opensea	TSS1500-opensea
cg13978777	-0.133993	0.175481	-4.46212	0.000448319	0.0295346	-0.399048	0.242477	0.108484	-0.133993	19	2491825	F	II		IGR	shelf	IGR-shelf	chr19:2494095-2495214	TRUE			rs72975354	rs10402977
cg00745735	0.124066	0.530219	4.46124	0.000449109	0.0295568	-0.400823	0.468186	0.592251	0.124066	10	69868860	R	II	MYPN	TSS1500	opensea	TSS1500-opensea
cg14434601	0.1248	0.786577	4.45937	0.0004508	0.029596	-0.404609	0.724177	0.848978	0.1248	7	42303654	R	II		IGR	opensea	IGR-opensea			TRUE
cg25928986	0.112713	0.40656	4.45872	0.000451388	0.0296254	-0.405923	0.350203	0.462916	0.112713	7	96647079	R	II		IGR	shore	IGR-shore	chr7:96645786-96646599
cg04798490	0.134858	0.604373	4.45788	0.000452149	0.0296475	-0.407621	0.536944	0.671802	0.134858	11	70517045	R	II	SHANK2	Body	opensea	Body-opensea			TRUE
cg10672164	0.106552	0.462549	4.45675	0.000453176	0.0296871	-0.409909	0.409273	0.515825	0.106552	13	98859885	R	II	FARP1	5'UTR	opensea	5'UTR-opensea			TRUE
cg10888461	0.134188	0.445668	4.45448	0.000455238	0.0297551	-0.414484	0.378574	0.512762	0.134188	4	113300821	R	II	ALPK1	Body	shore	Body-shore	chr4:113300552-113300769		TRUE
cg00402554	0.181413	0.788879	4.45445	0.000455274	0.0297551	-0.414564	0.698172	0.879585	0.181413	1	56454285	R	II		IGR	opensea	IGR-opensea			TRUE
cg01138164	0.118944	0.252519	4.45388	0.000455792	0.0297747	-0.41571	0.193046	0.311991	0.118944	7	96648447	F	II		IGR	shore	IGR-shore	chr7:96650221-96651551
cg12323850	0.344262	0.410373	4.45319	0.000456421	0.0297884	-0.4171	0.238243	0.582504	0.344262	11	94245795	R	I		IGR	island	IGR-island	chr11:94245546-94245891	TRUE	TRUE
cg07142131	0.101537	0.824776	4.45107	0.000458364	0.0298495	-0.421382	0.774008	0.875544	0.101537	1	22247949	F	II	HSPG2	Body	opensea	Body-opensea			TRUE
cg10563645	0.107338	0.479459	4.45089	0.00045853	0.029852	-0.421746	0.42579	0.533129	0.107338	6	31705988	R	II		IGR	shore	IGR-shore	chr6:31707489-31708336	TRUE	TRUE
cg15892963	-0.120088	0.188298	-4.44974	0.000459597	0.0298907	-0.424088	0.248342	0.128254	-0.120088	14	96670960	F	II	BDKRB2	TSS200	opensea	TSS200-opensea		TRUE
cg17608722	0.108985	0.242874	4.44903	0.000460248	0.0299176	-0.425516	0.188382	0.297367	0.108985	6	28706392	F	II		IGR	opensea	IGR-opensea					rs78566812
cg13475822	0.147445	0.288851	4.44874	0.000460521	0.029926	-0.426113	0.215128	0.362573	0.147445	3	9210116	R	II	SRGAP3	Body	opensea	Body-opensea			TRUE
cg21384789	0.169121	0.579551	4.44702	0.000462108	0.0299967	-0.429579	0.494991	0.664112	0.169121	15	48497653	R	II	SLC12A1	TSS1500	opensea	TSS1500-opensea
cg03735592	0.136438	0.587	4.44618	0.000462892	0.0300172	-0.431288	0.518781	0.655219	0.136438	6	138821354	R	II	NHSL1	TSS1500	opensea	TSS1500-opensea			TRUE
cg05545039	0.106456	0.695082	4.4443	0.000464636	0.030068	-0.435077	0.641854	0.74831	0.106456	5	86711879	R	II		IGR	shelf	IGR-shelf	chr5:86708296-86708878
cg11442280	-0.192767	0.468724	-4.44278	0.000466054	0.0301135	-0.43815	0.565108	0.372341	-0.192767	2	164461604	R	II		IGR	opensea	IGR-opensea			TRUE
cg12214614	0.113486	0.668376	4.44169	0.00046708	0.0301462	-0.440364	0.611633	0.72512	0.113486	14	98178341	R	II		IGR	opensea	IGR-opensea			TRUE
cg12084990	-0.156802	0.495177	-4.44039	0.000468305	0.0301721	-0.443004	0.573578	0.416776	-0.156802	10	91276070	F	II	SLC16A12	5'UTR	opensea	5'UTR-opensea		TRUE	TRUE		rs74805367
cg12728606	0.12244	0.623438	4.44037	0.000468324	0.0301721	-0.443045	0.562218	0.684658	0.12244	4	7903970	R	II	AFAP1	5'UTR	opensea	5'UTR-opensea			TRUE
cg08847775	0.136211	0.206206	4.44028	0.000468401	0.0301725	-0.44321	0.1381	0.274311	0.136211	2	43422121	F	II		IGR	opensea	IGR-opensea
cg25223700	0.138735	0.75645	4.43596	0.000472485	0.0303144	-0.451959	0.687082	0.825817	0.138735	3	71721381	R	II		IGR	opensea	IGR-opensea			TRUE
cg03116035	0.113602	0.794265	4.43487	0.000473522	0.0303444	-0.454168	0.737464	0.851066	0.113602	4	170897498	R	II		IGR	opensea	IGR-opensea			TRUE
cg26188212	0.216268	0.411119	4.43457	0.00047381	0.0303466	-0.45478	0.302985	0.519253	0.216268	1	228967124	F	II		IGR	opensea	IGR-opensea		TRUE	TRUE		rs76619581
cg13623749	0.113817	0.640083	4.43362	0.000474712	0.0303581	-0.456696	0.583175	0.696992	0.113817	6	15329886	R	II	JARID2	Body	opensea	Body-opensea			TRUE
cg09457245	-0.132848	0.615943	-4.43166	0.000476578	0.0304302	-0.46065	0.682368	0.549519	-0.132848	12	54778750	R	II	ZNF385A	Body	opensea	Body-opensea			TRUE
cg09176292	-0.127823	0.449603	-4.43075	0.000477452	0.0304328	-0.462496	0.513514	0.385691	-0.127823	6	86356271	R	II		IGR	shelf	IGR-shelf	chr6:86351551-86353914
cg01569295	-0.170674	0.727976	-4.43033	0.00047786	0.0304361	-0.463356	0.813313	0.64264	-0.170674	1	231155862	R	II	MIR1182	TSS200	opensea	TSS200-opensea			TRUE
cg23008352	0.140449	0.340302	4.42973	0.000478432	0.0304458	-0.464563	0.270077	0.410527	0.140449	13	110951025	R	I	COL4A1	Body	opensea	Body-opensea			TRUE
cg03236948	0.127478	0.406266	4.42947	0.000478682	0.0304571	-0.465088	0.342527	0.470005	0.127478	11	63997492	F	II	DNAJC4	TSS1500	shore	TSS1500-shore	chr11:63997662-63998412
cg22692507	0.100288	0.595118	4.4286	0.000479519	0.0304873	-0.466849	0.544974	0.645262	0.100288	5	81446503	R	II	ATG10	Body	opensea	Body-opensea			TRUE
cg18121605	0.247522	0.64373	4.42677	0.000481291	0.030563	-0.470565	0.51997	0.767491	0.247522	X	128815558	R	II		IGR	shelf	IGR-shelf	chrX:128812232-128812519
cg03216580	-0.112848	0.491613	-4.42639	0.000481651	0.0305724	-0.471319	0.548037	0.435189	-0.112848	10	3818357	F	II	KLF6	Body	opensea	Body-opensea			TRUE
cg06874403	0.120587	0.356703	4.42537	0.000482644	0.0306074	-0.473394	0.29641	0.416997	0.120587	10	21799047	F	II		IGR	island	IGR-island	chr10:21797632-21799341	TRUE	TRUE
cg05088356	0.129673	0.702763	4.42392	0.000484047	0.0306374	-0.476317	0.637926	0.767599	0.129673	5	66124167	F	II	MAST4	TSS1500	opensea	TSS1500-opensea			TRUE
cg01573306	0.114301	0.601046	4.42294	0.000485004	0.0306505	-0.478308	0.543895	0.658196	0.114301	1	172330400	F	II	DNM3	Body	opensea	Body-opensea			TRUE		rs9425573
cg11828251	0.107183	0.77634	4.42267	0.000485264	0.0306505	-0.478848	0.722749	0.829932	0.107183	1	110715664	F	II	SLC6A17	Body	opensea	Body-opensea			TRUE
cg22499809	0.107263	0.640494	4.42177	0.000486147	0.0306769	-0.480679	0.586863	0.694126	0.107263	19	5692622	F	II	LONP1	Body	shore	Body-shore	chr19:5694382-5694848		TRUE
cg25086874	0.118389	0.726554	4.42125	0.000486656	0.0306952	-0.481734	0.66736	0.785749	0.118389	3	112067412	F	II	CD200	Body	opensea	Body-opensea			TRUE		rs2399418
cg10535500	0.102315	0.597036	4.42013	0.000487752	0.0307275	-0.483999	0.545879	0.648194	0.102315	6	33398610	R	II	SYNGAP1	Body	shelf	Body-shelf	chr6:33396050-33396296	TRUE
cg17415947	0.113024	0.408079	4.41798	0.000489865	0.0308077	-0.488355	0.351567	0.464591	0.113024	2	71682597	R	II	DYSF	Body	shore	Body-shore	chr2:71680558-71681276		TRUE
cg01011898	-0.1063	0.241206	-4.41735	0.000490481	0.0308118	-0.48962	0.294356	0.188056	-0.1063	2	9283292	R	II		IGR	opensea	IGR-opensea
cg13359998	-0.109439	0.15875	-4.41565	0.000492167	0.0308762	-0.493078	0.213469	0.104031	-0.109439	1	230241764	F	II	GALNT2	Body	opensea	Body-opensea		TRUE			rs2144295
cg19620333	-0.112888	0.433857	-4.41455	0.000493249	0.0309164	-0.495289	0.490301	0.377413	-0.112888	15	81596332	F	II	IL16	Body	opensea	Body-opensea			TRUE
cg27262054	0.12026	0.381717	4.41322	0.00049457	0.0309465	-0.497983	0.321587	0.441847	0.12026	16	73067525	R	I	ZFHX3	5'UTR	opensea	5'UTR-opensea			TRUE
cg07899272	0.137699	0.621754	4.41236	0.000495433	0.0309657	-0.49974	0.552905	0.690604	0.137699	2	75049872	F	II		IGR	opensea	IGR-opensea			TRUE
cg26522946	-0.113854	0.291081	-4.41062	0.000497164	0.0310324	-0.503254	0.348008	0.234154	-0.113854	10	70847350	F	II	SRGN	TSS1500	opensea	TSS1500-opensea
cg17094356	0.135697	0.591135	4.41033	0.000497452	0.0310365	-0.503836	0.523286	0.658984	0.135697	11	104789337	R	II		IGR	opensea	IGR-opensea
cg05729490	-0.100704	0.192387	-4.40801	0.000499779	0.0311263	-0.508538	0.242739	0.142035	-0.100704	7	27404187	R	II		IGR	opensea	IGR-opensea			TRUE
cg16327338	0.127389	0.720013	4.40781	0.000499984	0.0311313	-0.50895	0.656319	0.783707	0.127389	10	116232841	F	II	ABLIM1	Body	opensea	Body-opensea			TRUE
cg23100365	0.154459	0.572523	4.40709	0.000500709	0.0311704	-0.510409	0.495293	0.649753	0.154459	8	41500461	R	II		IGR	shelf	IGR-shelf	chr8:41503916-41504266					rs79149006
cg11714752	-0.108931	0.226927	-4.40687	0.000500923	0.0311713	-0.510841	0.281393	0.172462	-0.108931	2	96926568	F	II	TMEM127	Body	opensea	Body-opensea		TRUE	TRUE
cg05348897	-0.100965	0.794296	-4.40571	0.000502096	0.0312065	-0.513197	0.844778	0.743813	-0.100965	19	49302856	R	II	BCAT2	Body	island	Body-island	chr19:49302855-49303118		TRUE
cg22708961	-0.112979	0.700766	-4.40432	0.000503503	0.0312519	-0.516015	0.757255	0.644276	-0.112979	1	2254245	R	I	MORN1	Body	island	Body-island	chr1:2253723-2254758	TRUE	TRUE
cg08324862	0.183192	0.569362	4.4003	0.000507587	0.0313798	-0.524151	0.477766	0.660958	0.183192	12	77800655	R	II		IGR	opensea	IGR-opensea			TRUE
cg00643814	0.162806	0.389693	4.40011	0.000507787	0.0313798	-0.524548	0.30829	0.471096	0.162806	12	106573195	R	II		IGR	opensea	IGR-opensea			TRUE
cg02272429	0.181394	0.523904	4.40002	0.000507875	0.0313798	-0.524723	0.433207	0.614601	0.181394	15	25756044	F	II		IGR	opensea	IGR-opensea			TRUE
cg00138926	0.10562	0.564948	4.3988	0.000509119	0.0314289	-0.527188	0.512138	0.617758	0.10562	2	11118414	F	II		IGR	opensea	IGR-opensea					rs78534350
cg11480762	-0.128262	0.55632	-4.39798	0.000509963	0.0314579	-0.528855	0.620451	0.492189	-0.128262	10	73103395	F	II	SLC29A3	Body	opensea	Body-opensea			TRUE		rs78329982
cg05672912	0.111525	0.235458	4.39778	0.000510165	0.0314581	-0.529254	0.179696	0.291221	0.111525	5	174115735	F	II		IGR	opensea	IGR-opensea			TRUE
cg23538064	-0.103462	0.514783	-4.396	0.000511998	0.0315002	-0.532866	0.566514	0.463053	-0.103462	6	31913275	F	II	C2	3'UTR	opensea	3'UTR-opensea			TRUE
cg15097422	0.113269	0.450829	4.39595	0.000512054	0.0315002	-0.532975	0.394194	0.507463	0.113269	3	13597750	R	II	FBLN2	5'UTR	opensea	5'UTR-opensea			TRUE
cg00532824	-0.109769	0.5944	-4.39452	0.000513527	0.0315483	-0.535868	0.649285	0.539515	-0.109769	16	75241914	F	II	CTRB2	TSS1500	opensea	TSS1500-opensea
cg26984626	0.181829	0.187301	4.39441	0.000513644	0.0315509	-0.536098	0.0963864	0.278216	0.181829	7	88388587	F	II	ZNF804B	TSS200	island	TSS200-island	chr7:88388488-88389283
cg02870741	0.127239	0.755783	4.39393	0.00051414	0.0315717	-0.537071	0.692164	0.819403	0.127239	19	16272369	F	II	CIB3	Body	opensea	Body-opensea			TRUE
cg09636245	0.117682	0.557618	4.39248	0.000515639	0.0316226	-0.540002	0.498778	0.616459	0.117682	11	7699330	F	II		IGR	shelf	IGR-shelf	chr11:7694711-7695685
cg21308365	0.117306	0.526517	4.39036	0.000517842	0.0316792	-0.544295	0.467864	0.58517	0.117306	6	119031399	F	II		IGR	opensea	IGR-opensea
cg04855291	0.130649	0.502844	4.38935	0.000518898	0.0317149	-0.546346	0.437519	0.568169	0.130649	X	152161956	F	I	PNMA5	TSS1500	shore	TSS1500-shore	chrX:152162552-152162842
cg25498969	-0.153398	0.76114	-4.38817	0.000520133	0.0317594	-0.548741	0.837839	0.684441	-0.153398	3	136062740	R	II	STAG1	Body	opensea	Body-opensea		TRUE	TRUE
cg21523751	0.121235	0.365751	4.38781	0.000520508	0.0317727	-0.549465	0.305133	0.426368	0.121235	1	182988639	F	II		IGR	shelf	IGR-shelf	chr1:182991804-182993370
cg24451653	0.108129	0.710465	4.38697	0.000521385	0.0317943	-0.551162	0.656401	0.76453	0.108129	10	104375165	R	II	SUFU	Body	opensea	Body-opensea		TRUE	TRUE
cg25046563	0.132992	0.581193	4.38593	0.000522483	0.0318198	-0.553281	0.514697	0.647689	0.132992	7	18043678	F	II		IGR	opensea	IGR-opensea			TRUE
cg11744021	0.122678	0.408889	4.38573	0.000522696	0.0318281	-0.55369	0.347551	0.470228	0.122678	6	151342906	R	II	MTHFD1L	Body	opensea	Body-opensea			TRUE
cg03439687	0.111857	0.50793	4.38494	0.000523527	0.0318516	-0.555289	0.452001	0.563859	0.111857	13	42894507	R	II	AKAP11	3'UTR	opensea	3'UTR-opensea			TRUE
cg08568550	0.127345	0.305532	4.38487	0.000523599	0.0318516	-0.555428	0.24186	0.369205	0.127345	11	8954570	R	I	C11orf16	TSS200	opensea	TSS200-opensea			TRUE
cg24864984	0.145387	0.692831	4.38479	0.000523684	0.0318516	-0.555592	0.620137	0.765524	0.145387	3	71128840	R	II	FOXP1	Body	opensea	Body-opensea			TRUE
cg04216240	-0.137381	0.543074	-4.38293	0.000525648	0.0318971	-0.559361	0.611764	0.474384	-0.137381	11	66822853	F	II	RHOD	TSS1500	shore	TSS1500-shore	chr11:66824118-66824621		TRUE
cg16967296	0.106642	0.720214	4.37863	0.000530211	0.0320567	-0.568064	0.666893	0.773535	0.106642	11	27450634	F	II	LGR4	Body	opensea	Body-opensea			TRUE			rs78249644
cg18891604	0.100047	0.588102	4.37775	0.000531153	0.0320739	-0.569852	0.538079	0.638126	0.100047	6	36319055	F	II		IGR	opensea	IGR-opensea		TRUE	TRUE
cg00465970	0.13266	0.54596	4.37639	0.000532617	0.0321287	-0.572623	0.47963	0.61229	0.13266	3	129024601	F	II		IGR	opensea	IGR-opensea		TRUE
cg12455187	0.15964	0.783317	4.37593	0.000533106	0.0321392	-0.573547	0.703497	0.863137	0.15964	17	34208503	R	II	CCL5	TSS1500	opensea	TSS1500-opensea
cg14512813	0.105376	0.712272	4.3758	0.000533244	0.0321392	-0.573807	0.659584	0.76496	0.105376	3	187618877	R	II		IGR	opensea	IGR-opensea			TRUE
cg08453903	0.10007	0.712253	4.37439	0.000534763	0.032187	-0.576671	0.662218	0.762288	0.10007	17	71688187	R	II		IGR	opensea	IGR-opensea			TRUE		rs11458411	rs66501313
cg08041350	0.160085	0.498086	4.37338	0.000535846	0.0322153	-0.578708	0.418043	0.578128	0.160085	17	25819112	R	II	KSR1	5'UTR	opensea	5'UTR-opensea			TRUE
cg19249874	0.121197	0.575792	4.37257	0.000536728	0.0322393	-0.580363	0.515194	0.636391	0.121197	7	28895537	F	II		IGR	shore	IGR-shore	chr7:28893453-28894058	TRUE			rs79017130
cg00465739	0.108948	0.212689	4.37097	0.000538462	0.0322973	-0.583611	0.158215	0.267163	0.108948	13	25993555	F	II	ATP8A2	Body	opensea	Body-opensea			TRUE
cg01303055	-0.130687	0.217291	-4.36965	0.000539894	0.0323333	-0.586285	0.282635	0.151948	-0.130687	11	11265429	R	II		IGR	opensea	IGR-opensea			TRUE
cg00399378	0.118854	0.731531	4.36964	0.000539906	0.0323333	-0.586307	0.672104	0.790958	0.118854	15	78383919	F	II	SH2D7	TSS1500	opensea	TSS1500-opensea
cg00549574	0.111411	0.601695	4.36862	0.000541014	0.0323719	-0.588371	0.545989	0.657401	0.111411	17	74350942	F	I	PRPSAP1	TSS1500	shore	TSS1500-shore	chr17:74349151-74350656				rs12451353
cg18848959	0.108403	0.450581	4.3678	0.000541905	0.0323976	-0.590028	0.39638	0.504782	0.108403	20	60638814	F	I	TAF4	Body	island	Body-island	chr20:60638612-60638982		TRUE		rs6142941
cg22962264	-0.140679	0.192183	-4.36765	0.000542066	0.0324011	-0.590327	0.262522	0.121844	-0.140679	15	35359641	R	II		IGR	opensea	IGR-opensea			TRUE
cg06473109	0.113691	0.225909	4.36703	0.000542747	0.0324157	-0.591591	0.169064	0.282754	0.113691	16	3068467	R	I	CLDN6	TSS1500	shore	TSS1500-shore	chr16:3070095-3071305	TRUE
cg17723761	0.152351	0.718248	4.36589	0.000543992	0.0324619	-0.593897	0.642072	0.794424	0.152351	12	7864013	F	II	DPPA3	TSS200	opensea	TSS200-opensea			TRUE
cg08447373	-0.141339	0.461476	-4.36583	0.000544059	0.0324619	-0.594022	0.532146	0.390806	-0.141339	5	90478943	R	II		IGR	opensea	IGR-opensea			TRUE
cg01305539	0.118243	0.662007	4.36542	0.000544511	0.0324796	-0.594858	0.602886	0.721129	0.118243	9	124328327	R	II	DAB2IP	TSS1500	opensea	TSS1500-opensea
cg13566088	0.101142	0.813609	4.36298	0.000547194	0.0325888	-0.599805	0.763039	0.86418	0.101142	9	90435638	R	II		IGR	shelf	IGR-shelf	chr9:90439605-90440092
cg12316290	0.111329	0.743104	4.3627	0.000547502	0.0325965	-0.600373	0.68744	0.798769	0.111329	13	30425969	F	II	UBL3	TSS1500	shore	TSS1500-shore	chr13:30423921-30424941
cg25085142	0.100701	0.792971	4.36062	0.000549806	0.0326424	-0.604599	0.74262	0.843321	0.100701	14	29445296	R	II		IGR	opensea	IGR-opensea			TRUE
cg21365444	0.11021	0.726858	4.35961	0.000550925	0.0326723	-0.606645	0.671753	0.781963	0.11021	3	138554516	R	II		IGR	shore	IGR-shore	chr3:138553159-138554078
cg22985134	0.117599	0.501155	4.35906	0.000551536	0.0326947	-0.607762	0.442356	0.559954	0.117599	X	106163661	R	II	CLDN2	5'UTR	opensea	5'UTR-opensea			TRUE
cg15535471	0.108357	0.660154	4.35874	0.000551892	0.032699	-0.608411	0.605976	0.714333	0.108357	7	139332087	R	II	HIPK2	Body	opensea	Body-opensea			TRUE
cg11081251	0.110241	0.506586	4.35845	0.000552211	0.0327041	-0.608993	0.451465	0.561706	0.110241	15	65375977	R	II		IGR	opensea	IGR-opensea			TRUE
cg16000520	0.133867	0.655715	4.35654	0.000554343	0.032778	-0.612871	0.588782	0.722648	0.133867	2	235408237	F	II		IGR	shore	IGR-shore	chr2:235404502-235406541
cg13995568	0.136689	0.7897	4.35526	0.000555772	0.0328348	-0.615462	0.721356	0.858044	0.136689	6	119774243	F	II		IGR	opensea	IGR-opensea			TRUE
cg24056365	0.157494	0.616187	4.35485	0.000556229	0.032848	-0.61629	0.53744	0.694934	0.157494	1	110834615	F	II		IGR	opensea	IGR-opensea			TRUE		rs6703064
cg13580827	0.134944	0.615353	4.35144	0.000560066	0.0329543	-0.62321	0.547881	0.682825	0.134944	9	72081155	F	II	APBA1	Body	opensea	Body-opensea			TRUE
cg17041511	0.171997	0.23108	4.34828	0.000563645	0.0330884	-0.62962	0.145081	0.317078	0.171997	17	61509620	R	II		IGR	shelf	IGR-shelf	chr17:61511653-61511886					rs72407568
cg17356112	-0.144674	0.515666	-4.34802	0.00056394	0.0330968	-0.630146	0.588003	0.443329	-0.144674	7	132334710	R	II	PLXNA4	TSS1500	opensea	TSS1500-opensea
cg09671309	-0.142015	0.546533	-4.34651	0.000565666	0.0331235	-0.633223	0.617541	0.475526	-0.142015	12	122158208	R	II	TMEM120B	Body	opensea	Body-opensea		TRUE	TRUE
cg17796461	0.104847	0.699379	4.34504	0.000567338	0.0331827	-0.636193	0.646956	0.751803	0.104847	15	31685823	F	II		IGR	island	IGR-island	chr15:31683984-31685824
cg02703145	0.103016	0.621	4.34304	0.000569635	0.0332694	-0.640259	0.569492	0.672508	0.103016	9	93922525	F	II		IGR	island	IGR-island	chr9:93922196-93922679
cg07942500	0.123013	0.209322	4.34299	0.000569691	0.0332694	-0.640358	0.147815	0.270829	0.123013	14	65173434	R	II	PLEKHG3	5'UTR	shore	5'UTR-shore	chr14:65170876-65172007		TRUE
cg26160189	0.123499	0.533265	4.34267	0.00057006	0.0332864	-0.64101	0.471516	0.595015	0.123499	4	187574055	R	II	FAT1	Body	opensea	Body-opensea			TRUE
cg08119434	0.11432	0.657906	4.342	0.000570836	0.0333132	-0.642379	0.600746	0.715066	0.11432	2	205036349	R	II		IGR	opensea	IGR-opensea			TRUE
cg21977234	0.157893	0.310852	4.34099	0.000572	0.033345	-0.644429	0.231906	0.389799	0.157893	19	18701320	F	I	C19orf60	Body	shore	Body-shore	chr19:18699422-18700554	TRUE
cg14618624	0.129854	0.342976	4.34078	0.000572243	0.033349	-0.644856	0.278049	0.407903	0.129854	16	3068382	F	II	CLDN6	TSS200	shore	TSS200-shore	chr16:3070095-3071305
cg16642695	0.176715	0.553499	4.34011	0.00057301	0.0333798	-0.646203	0.465141	0.641857	0.176715	8	67343633	F	II	ADHFE1	TSS1500	shore	TSS1500-shore	chr8:67344497-67344989
cg18932699	0.150412	0.240235	4.33968	0.000573506	0.0333874	-0.647074	0.165029	0.315441	0.150412	8	64518293	R	II		IGR	opensea	IGR-opensea			TRUE
cg01808879	0.127963	0.155399	4.33893	0.00057438	0.0334014	-0.648606	0.0914172	0.21938	0.127963	12	98911336	F	II	LOC100128191	TSS1500	shore	TSS1500-shore	chr12:98909052-98910261				rs11109510
cg01722450	0.173851	0.695467	4.33891	0.000574406	0.0334014	-0.648653	0.608541	0.782392	0.173851	18	61816636	R	II	C18orf20	TSS1500	opensea	TSS1500-opensea
cg19891517	0.130778	0.621516	4.33859	0.000574776	0.0334052	-0.6493	0.556127	0.686905	0.130778	14	24110580	F	I	DHRS2	Body	opensea	Body-opensea			TRUE
cg06530558	0.141912	0.809027	4.3378	0.000575683	0.0334199	-0.650886	0.738071	0.879983	0.141912	15	54304778	F	II	UNC13C	TSS1500	opensea	TSS1500-opensea
cg04244183	0.105795	0.419385	4.33557	0.000578286	0.0334833	-0.655427	0.366487	0.472283	0.105795	1	244143270	R	II		IGR	shore	IGR-shore	chr1:244142851-244143055
cg10680210	0.116028	0.691443	4.33394	0.000580184	0.0335313	-0.658724	0.63343	0.749457	0.116028	11	64107158	R	II	CCDC88B	TSS1500	shelf	TSS1500-shelf	chr11:64109822-64110228
cg08828787	0.103245	0.705381	4.3337	0.00058047	0.0335313	-0.65922	0.653758	0.757003	0.103245	7	42031896	F	II	GLI3	Body	opensea	Body-opensea			TRUE
cg27660627	-0.135181	0.232827	-4.33356	0.00058063	0.0335313	-0.659497	0.300417	0.165236	-0.135181	16	89461803	R	II	ANKRD11	5'UTR	opensea	5'UTR-opensea		TRUE	TRUE
cg10628618	-0.104128	0.522878	-4.33243	0.000581957	0.0335757	-0.661795	0.574941	0.470814	-0.104128	1	215779210	R	II	KCTD3	Body	opensea	Body-opensea			TRUE
cg27288595	0.132273	0.864586	4.33092	0.00058373	0.0336148	-0.664855	0.79845	0.930723	0.132273	3	141094238	F	II	ZBTB38	5'UTR	opensea	5'UTR-opensea			TRUE
cg23291376	-0.117732	0.787123	-4.33054	0.000584183	0.0336211	-0.665635	0.845988	0.728257	-0.117732	2	20336282	R	II		IGR	opensea	IGR-opensea			TRUE
cg24263283	0.101329	0.392912	4.33045	0.000584284	0.0336223	-0.66581	0.342247	0.443576	0.101329	15	59587546	R	II	MYO1E	Body	opensea	Body-opensea			TRUE
cg13119578	-0.110186	0.241841	-4.33014	0.00058465	0.0336341	-0.666439	0.296934	0.186748	-0.110186	11	65196696	F	II		IGR	opensea	IGR-opensea			TRUE	low-CpG:64952070-64953288
cg11336178	0.115673	0.645983	4.32897	0.00058603	0.0336767	-0.668811	0.588147	0.70382	0.115673	6	42931581	R	II	GNMT	3'UTR	shelf	3'UTR-shelf	chr6:42928218-42928810	TRUE	TRUE
cg08894273	0.107056	0.460414	4.32762	0.000587632	0.0337273	-0.671559	0.406886	0.513942	0.107056	1	161109487	R	II		IGR	shore	IGR-shore	chr1:161110859-161111107
cg04751032	-0.148944	0.264874	-4.32631	0.000589187	0.0337845	-0.674217	0.339346	0.190402	-0.148944	16	66443287	F	II		IGR	shelf	IGR-shelf	chr16:66440502-66440958
cg26837800	0.103978	0.390331	4.32612	0.000589419	0.0337884	-0.674614	0.338342	0.44232	0.103978	1	56842338	R	II		IGR	opensea	IGR-opensea			TRUE
cg03394422	0.131633	0.606415	4.32496	0.000590797	0.0338167	-0.676963	0.540599	0.672232	0.131633	14	75389280	F	II	RPS6KL1	TSS200	shore	TSS200-shore	chr14:75389712-75390133
cg02837128	0.128324	0.487038	4.32364	0.000592368	0.0338724	-0.679635	0.422875	0.5512	0.128324	8	30241167	F	II	RBPMS	TSS1500	shore	TSS1500-shore	chr8:30241416-30242878
cg19399370	0.142694	0.64136	4.32316	0.000592951	0.0338893	-0.680624	0.570013	0.712707	0.142694	6	74268449	R	II		IGR	opensea	IGR-opensea			TRUE
cg08559364	0.113381	0.469517	4.32245	0.000593797	0.0339146	-0.682059	0.412826	0.526207	0.113381	3	11634536	F	II	VGLL4	Body	opensea	Body-opensea			TRUE
cg04855107	0.103359	0.51369	4.32158	0.000594838	0.033968	-0.683821	0.46201	0.565369	0.103359	6	108971457	R	II	FOXO3	Body	opensea	Body-opensea			TRUE
cg24657463	0.137587	0.7372	4.32035	0.000596318	0.034017	-0.686321	0.668407	0.805994	0.137587	17	40431527	R	II		IGR	shelf	IGR-shelf	chr17:40427951-40429036					rs35898550
cg03023237	0.149306	0.569598	4.31909	0.000597835	0.0340528	-0.688877	0.494945	0.644251	0.149306	16	66953047	F	II	CDH16	TSS1500	shelf	TSS1500-shelf	chr16:66955943-66956251				rs9888804
cg12634957	0.124786	0.795376	4.31888	0.000598094	0.0340629	-0.689312	0.732983	0.857769	0.124786	1	33169850	R	II	SYNC	TSS1500	shore	TSS1500-shore	chr1:33168019-33168865
cg24795825	0.125855	0.353642	4.31824	0.000598864	0.0340745	-0.690606	0.290714	0.41657	0.125855	15	79164541	R	I	MORF4L1	TSS1500	shore	TSS1500-shore	chr15:79165102-79166057
cg17667592	0.123825	0.672049	4.31711	0.000600229	0.0341256	-0.692896	0.610136	0.733962	0.123825	11	123496000	R	II		IGR	opensea	IGR-opensea
cg02718825	0.126296	0.768903	4.31696	0.000600412	0.0341256	-0.693203	0.705755	0.832051	0.126296	20	55202842	R	II		IGR	island	IGR-island	chr20:55200279-55206789
cg17781669	0.126755	0.60908	4.31637	0.000601127	0.0341433	-0.694401	0.545702	0.672457	0.126755	5	149868359	F	II		IGR	shelf	IGR-shelf	chr5:149865064-149866038	TRUE	TRUE
cg04158862	-0.124484	0.283361	-4.31602	0.000601554	0.034149	-0.695115	0.345603	0.22112	-0.124484	14	70124707	F	II	KIAA0247	5'UTR	opensea	5'UTR-opensea			TRUE
cg12588208	0.101156	0.766653	4.31584	0.000601768	0.0341544	-0.695473	0.716075	0.817231	0.101156	3	119547934	R	II	GSK3B	Body	opensea	Body-opensea			TRUE			rs72967123
cg22192614	0.140426	0.639107	4.31547	0.00060222	0.0341592	-0.696228	0.568894	0.70932	0.140426	15	69486004	F	II	MIR548H4	Body	opensea	Body-opensea			TRUE
cg24909309	0.135039	0.669336	4.31515	0.000602612	0.0341676	-0.696883	0.601816	0.736855	0.135039	8	38387291	R	II	C8orf86	TSS1500	opensea	TSS1500-opensea
cg12573115	0.118186	0.443193	4.31409	0.000603905	0.0342179	-0.699038	0.3841	0.502286	0.118186	10	46993542	F	I	GPRIN2	TSS200	shore	TSS200-shore	chr10:46992447-46993295	TRUE
cg06872115	0.188876	0.359265	4.31384	0.000604212	0.0342307	-0.69955	0.264827	0.453703	0.188876	17	26871676	F	II		IGR	opensea	IGR-opensea			TRUE
cg26771272	-0.193572	0.547595	-4.31301	0.000605217	0.0342546	-0.701222	0.644381	0.45081	-0.193572	17	18163183	R	II	FLII	TSS1500	shore	TSS1500-shore	chr17:18163685-18164672
cg01788444	0.156511	0.190466	4.31275	0.00060554	0.0342546	-0.701758	0.11221	0.268722	0.156511	3	119308390	R	II	ADPRH	3'UTR	opensea	3'UTR-opensea			TRUE
cg05210380	0.130952	0.360582	4.31209	0.000606344	0.0342751	-0.703094	0.295106	0.426059	0.130952	6	34528827	R	I		IGR	opensea	IGR-opensea		TRUE	TRUE
cg10174333	0.115237	0.211431	4.31164	0.000606896	0.0342922	-0.704009	0.153813	0.26905	0.115237	1	116336029	R	II		IGR	opensea	IGR-opensea
cg22961212	0.133388	0.505932	4.31074	0.000608	0.0343031	-0.705837	0.439238	0.572626	0.133388	5	66564534	F	II		IGR	opensea	IGR-opensea		TRUE	TRUE
cg27103585	0.105175	0.744527	4.30357	0.000616875	0.0345665	-0.720414	0.691939	0.797114	0.105175	22	17955274	F	II	CECR2	TSS1500	opensea	TSS1500-opensea			TRUE		rs5992724
cg05695925	0.14926	0.442386	4.30166	0.00061926	0.0346493	-0.724294	0.367756	0.517016	0.14926	2	206493817	R	II		IGR	opensea	IGR-opensea			TRUE
cg11477270	-0.133077	0.589045	-4.29857	0.00062314	0.0347853	-0.730576	0.655583	0.522506	-0.133077	6	169423725	F	II		IGR	shore	IGR-shore	chr6:169424232-169425521				rs9355034
cg11222219	0.107421	0.816942	4.29768	0.000624261	0.0348134	-0.732383	0.763231	0.870652	0.107421	2	5584614	F	I		IGR	opensea	IGR-opensea					rs72493329
cg13922800	0.106839	0.334591	4.29727	0.000624774	0.0348306	-0.73321	0.281171	0.38801	0.106839	9	92310441	F	I	LOC100129066	Body	opensea	Body-opensea			TRUE
cg14422085	0.228956	0.70257	4.29681	0.000625355	0.0348306	-0.734144	0.588092	0.817048	0.228956	6	26225989	F	II		IGR	shore	IGR-shore	chr6:26225386-26225790				rs811041
cg10856296	-0.117473	0.70142	-4.29485	0.000627829	0.0349014	-0.738115	0.760156	0.642683	-0.117473	10	4890074	F	II	AKR1E2	3'UTR	opensea	3'UTR-opensea		TRUE	TRUE		rs4409732
cg22488259	0.132015	0.566988	4.2941	0.000628784	0.0349301	-0.739643	0.500981	0.632996	0.132015	1	201708500	R	II	NAV1	TSS1500	shore	TSS1500-shore	chr1:201708787-201709429	TRUE
cg18062721	0.116489	0.646906	4.29333	0.000629764	0.0349431	-0.741209	0.588661	0.70515	0.116489	3	11643427	R	I	VGLL4	Body	opensea	Body-opensea			TRUE
cg00615485	0.112832	0.657035	4.29325	0.000629863	0.0349431	-0.741368	0.600619	0.713451	0.112832	7	29519656	F	II	CHN2	5'UTR	opensea	5'UTR-opensea			TRUE
cg01576275	-0.103053	0.136534	-4.29305	0.000630125	0.0349498	-0.741786	0.18806	0.0850072	-0.103053	22	43409880	F	II		IGR	shore	IGR-shore	chr22:43410421-43411510
cg08897844	-0.131848	0.358414	-4.29284	0.000630395	0.0349498	-0.742217	0.424337	0.29249	-0.131848	5	36606102	R	II	SLC1A3	TSS1500	opensea	TSS1500-opensea
cg06014057	-0.116601	0.326528	-4.2928	0.000630445	0.0349498	-0.742297	0.384829	0.268228	-0.116601	16	12226852	R	II	SNX29	Body	opensea	Body-opensea			TRUE
cg26521139	-0.109828	0.573064	-4.29168	0.000631865	0.0350009	-0.744559	0.627978	0.51815	-0.109828	2	236658091	R	II	AGAP1	Body	opensea	Body-opensea		TRUE	TRUE
cg04270033	0.131088	0.766247	4.29151	0.000632086	0.0350085	-0.744911	0.700703	0.83179	0.131088	22	31364304	R	II	TUG1	TSS1500	shore	TSS1500-shore	chr22:31364564-31365575
cg09657615	0.197934	0.224866	4.29136	0.000632277	0.0350145	-0.745215	0.125899	0.323833	0.197934	6	128921652	F	II		IGR	opensea	IGR-opensea		TRUE	TRUE
cg24834165	0.103773	0.656299	4.28971	0.000634391	0.0350734	-0.748571	0.604413	0.708185	0.103773	5	95060853	F	II		IGR	opensea	IGR-opensea			TRUE		rs34293127
cg19640007	0.129737	0.611593	4.28952	0.000634637	0.0350759	-0.748961	0.546725	0.676461	0.129737	4	146600771	R	II	C4orf51	TSS1500	opensea	TSS1500-opensea		TRUE
cg15470344	0.108693	0.738216	4.2893	0.000634915	0.0350867	-0.749402	0.68387	0.792563	0.108693	1	203056504	F	II	MYOG	TSS1500	opensea	TSS1500-opensea
cg07710391	0.118942	0.742611	4.28776	0.000636894	0.0351269	-0.752531	0.683141	0.802082	0.118942	8	131337826	F	II	ASAP1	Body	opensea	Body-opensea			TRUE		rs2670882
cg04612952	0.139282	0.573863	4.28745	0.00063729	0.0351349	-0.753155	0.504222	0.643504	0.139282	15	91364242	R	II		IGR	shore	IGR-shore	chr15:91362445-91362658
cg10151953	0.103357	0.562987	4.28689	0.000638017	0.0351473	-0.754302	0.511308	0.614665	0.103357	16	85324347	F	II		IGR	shelf	IGR-shelf	chr16:85320574-85320775		TRUE
cg05552184	0.120561	0.804164	4.28604	0.000639117	0.0351941	-0.756034	0.743883	0.864444	0.120561	17	71548685	R	I	SDK2	Body	opensea	Body-opensea			TRUE
cg22205501	0.14339	0.379819	4.28596	0.000639217	0.035195	-0.756192	0.308124	0.451514	0.14339	12	7864047	R	I	DPPA3	TSS200	opensea	TSS200-opensea			TRUE
cg14648471	0.166314	0.567692	4.28424	0.000641447	0.0352578	-0.759694	0.484535	0.650849	0.166314	3	149779936	R	II		IGR	opensea	IGR-opensea			TRUE
cg00067768	-0.138971	0.701663	-4.28347	0.000642441	0.0352714	-0.761251	0.771148	0.632177	-0.138971	3	183886674	R	II	DVL3	Body	shore	Body-shore	chr3:183887815-183888478	TRUE	TRUE
cg16356622	0.125845	0.519552	4.28261	0.00064356	0.0352864	-0.763	0.456629	0.582475	0.125845	1	36351841	R	II	EIF2C1	Body	shelf	Body-shelf	chr1:36348501-36349731		TRUE
cg11288144	0.119004	0.673126	4.28186	0.00064454	0.0353186	-0.764531	0.613624	0.732628	0.119004	6	30649909	R	II	KIAA1949	Body	opensea	Body-opensea		TRUE
cg14166453	0.109644	0.846348	4.27928	0.000647904	0.0354414	-0.769764	0.791526	0.90117	0.109644	2	70189603	R	II	ASPRV1	TSS1500	shore	TSS1500-shore	chr2:70188511-70188726
cg21265278	0.108005	0.627465	4.27905	0.000648212	0.0354453	-0.770242	0.573463	0.681468	0.108005	1	179057067	F	II	TOR3A	Body	opensea	Body-opensea		TRUE	TRUE		rs12061876
cg01678383	0.105799	0.752186	4.27895	0.000648344	0.035447	-0.770446	0.699287	0.805086	0.105799	3	187903164	R	II	LPP	5'UTR	opensea	5'UTR-opensea			TRUE
cg01574390	-0.110066	0.623554	-4.27729	0.000650518	0.0354994	-0.773812	0.678587	0.568521	-0.110066	16	21623651	F	II	METTL9	Body	opensea	Body-opensea			TRUE
cg09012411	0.131206	0.702113	4.27366	0.000655311	0.0356243	-0.781192	0.63651	0.767716	0.131206	1	95167783	R	II		IGR	opensea	IGR-opensea			TRUE
cg03785755	0.136187	0.219091	4.27291	0.000656304	0.0356558	-0.782715	0.150998	0.287185	0.136187	6	26196794	F	II		IGR	shore	IGR-shore	chr6:26197070-26197537
cg07763467	0.102681	0.810516	4.27275	0.000656526	0.0356627	-0.783055	0.759175	0.861856	0.102681	10	7383727	F	II	SFMBT2	Body	opensea	Body-opensea			TRUE
cg08441850	0.10418	0.528079	4.27236	0.000657037	0.0356772	-0.783837	0.475989	0.580169	0.10418	17	37956902	R	II	IKZF3	Body	opensea	Body-opensea			TRUE
cg02498072	0.116064	0.620478	4.27192	0.000657627	0.0356949	-0.78474	0.562446	0.67851	0.116064	16	12088037	F	II	RUNDC2A	Body	opensea	Body-opensea			TRUE
cg17971961	0.172095	0.682307	4.2717	0.000657911	0.0357011	-0.785174	0.596259	0.768354	0.172095	1	35937013	F	II	KIAA0319L	Body	opensea	Body-opensea			TRUE		rs28482348
cg07598199	0.155673	0.346188	4.27134	0.00065839	0.0357132	-0.785906	0.268351	0.424024	0.155673	4	120056829	R	II	MYOZ2	TSS200	opensea	TSS200-opensea
cg18638180	-0.204655	0.593604	-4.27089	0.000658994	0.0357276	-0.786827	0.695931	0.491276	-0.204655	21	46379089	R	II	C21orf70	Body	shore	Body-shore	chr21:46378278-46378645	TRUE	TRUE
cg13849419	-0.154381	0.364732	-4.26891	0.00066164	0.0358156	-0.790855	0.441923	0.287542	-0.154381	9	71802071	R	II	TJP2	Body	opensea	Body-opensea			TRUE
cg16586530	0.129788	0.48531	4.26875	0.000661854	0.0358226	-0.79118	0.420416	0.550204	0.129788	1	38757902	F	II		IGR	opensea	IGR-opensea			TRUE
cg00622799	-0.192486	0.381194	-4.26825	0.00066253	0.0358322	-0.792206	0.477438	0.284951	-0.192486	20	62318588	R	II	RTEL1	Body	island	Body-island	chr20:62318359-62318658		TRUE
cg23339693	0.1131	0.595767	4.26824	0.000662543	0.0358322	-0.792225	0.539217	0.652317	0.1131	6	107382577	F	II		IGR	opensea	IGR-opensea			TRUE
cg13542368	0.192804	0.496693	4.268	0.000662854	0.0358352	-0.792697	0.400291	0.593095	0.192804	10	95049539	R	II		IGR	opensea	IGR-opensea			TRUE
cg18166947	-0.175033	0.287959	-4.26733	0.000663756	0.0358585	-0.794065	0.375476	0.200442	-0.175033	22	18189443	R	II	BCL2L13	Body	opensea	Body-opensea		TRUE
cg20578258	0.186431	0.39835	4.26697	0.000664246	0.0358644	-0.794806	0.305135	0.491566	0.186431	10	97732488	F	II		IGR	opensea	IGR-opensea
cg19160958	-0.106186	0.653402	-4.26416	0.000668034	0.0359996	-0.800522	0.706495	0.600309	-0.106186	17	35807884	R	II	TADA2A	Body	opensea	Body-opensea			TRUE
cg08215036	0.120625	0.586594	4.26168	0.00067139	0.036109	-0.80556	0.526282	0.646906	0.120625	10	62188287	R	II		IGR	opensea	IGR-opensea			TRUE
cg01323840	-0.124875	0.67258	-4.2562	0.000678879	0.0363652	-0.81671	0.735017	0.610143	-0.124875	16	12901108	F	II		IGR	shelf	IGR-shelf	chr16:12897365-12897889
cg23590389	-0.136072	0.261572	-4.25545	0.000679904	0.0363865	-0.818225	0.329608	0.193536	-0.136072	7	157102769	F	I		IGR	opensea	IGR-opensea		TRUE	TRUE		rs6976552	rs6975427
cg25020293	0.115201	0.601012	4.2516	0.000685231	0.0365417	-0.826069	0.543411	0.658612	0.115201	8	130912295	F	II	FAM49B	5'UTR	opensea	5'UTR-opensea			TRUE
cg27206295	0.128637	0.653929	4.25079	0.000686346	0.036565	-0.827703	0.58961	0.718247	0.128637	15	60618474	F	I		IGR	opensea	IGR-opensea			TRUE
cg07465431	0.109724	0.550047	4.24968	0.000687902	0.0366062	-0.829979	0.495185	0.604909	0.109724	13	113783975	R	II	F10	Body	island	Body-island	chr13:113783886-113784702		TRUE
cg11814087	-0.119934	0.739244	-4.24811	0.000690091	0.0366553	-0.833171	0.799211	0.679277	-0.119934	5	32391135	R	II	ZFR	Body	opensea	Body-opensea			TRUE
cg26793227	0.109827	0.53354	4.24808	0.000690128	0.0366553	-0.833225	0.478626	0.588454	0.109827	1	16483658	F	I	EPHA2	TSS1500	shore	TSS1500-shore	chr1:16481484-16482782				rs57602506
cg07196133	0.111573	0.835447	4.24587	0.000693221	0.0367574	-0.83772	0.779661	0.891234	0.111573	3	188439649	R	II	LPP	Body	opensea	Body-opensea			TRUE
cg17439800	0.108368	0.572259	4.24312	0.0006971	0.0368724	-0.843327	0.518074	0.626443	0.108368	1	208056493	R	II		IGR	opensea	IGR-opensea
cg23920120	0.12092	0.649511	4.24307	0.000697165	0.0368724	-0.84342	0.589051	0.709971	0.12092	11	122239845	R	II		IGR	opensea	IGR-opensea
cg15129052	-0.116388	0.743808	-4.24219	0.000698411	0.0369087	-0.845214	0.802002	0.685615	-0.116388	1	55416755	R	II		IGR	opensea	IGR-opensea		TRUE	TRUE
cg05794931	0.150676	0.465631	4.23977	0.000701833	0.0370151	-0.850126	0.390293	0.540969	0.150676	11	70493931	R	II	SHANK2	Body	opensea	Body-opensea			TRUE			rs559493
cg23490077	0.119037	0.427551	4.23959	0.000702093	0.0370242	-0.850498	0.368032	0.487069	0.119037	6	112610645	R	II		IGR	opensea	IGR-opensea			TRUE
cg07176692	0.142302	0.388153	4.23835	0.00070386	0.0370524	-0.853024	0.317002	0.459304	0.142302	1	113500329	F	II	SLC16A1	TSS1500	shore	TSS1500-shore	chr1:113498366-113499312	TRUE			rs41283092	rs79527611
cg14113958	-0.117792	0.259659	-4.23734	0.0007053	0.0370911	-0.855077	0.318555	0.200763	-0.117792	9	117657237	R	II		IGR	opensea	IGR-opensea		TRUE	TRUE
cg10293804	0.114686	0.410171	4.23611	0.00070706	0.0371543	-0.857581	0.352828	0.467514	0.114686	16	3068529	F	II	CLDN6	TSS1500	shore	TSS1500-shore	chr16:3070095-3071305	TRUE
cg20748791	0.125197	0.728127	4.23595	0.000707286	0.0371583	-0.857903	0.665528	0.790725	0.125197	6	15586071	R	II	DTNBP1	Body	opensea	Body-opensea			TRUE
cg05891572	0.143526	0.551251	4.2349	0.000708791	0.0372043	-0.860038	0.479488	0.623014	0.143526	7	33462512	F	II	BBS9	Body	opensea	Body-opensea			TRUE
cg04762312	0.108232	0.517032	4.23479	0.000708952	0.0372043	-0.860266	0.462916	0.571148	0.108232	6	157800071	F	II		IGR	shore	IGR-shore	chr6:157801062-157803377
cg25539628	0.101294	0.732639	4.23318	0.000711269	0.0372368	-0.863545	0.681992	0.783286	0.101294	8	8188483	R	II	PRAGMIN	Body	opensea	Body-opensea			TRUE
cg19862272	0.102433	0.805846	4.23282	0.000711793	0.0372413	-0.864285	0.754629	0.857062	0.102433	2	70190733	R	II	ASPRV1	TSS1500	shelf	TSS1500-shelf	chr2:70188511-70188726
cg02141748	0.101141	0.578842	4.2327	0.000711969	0.0372413	-0.864534	0.528272	0.629412	0.101141	20	3149470	F	II	ProSAPiP1	TSS1500	shore	TSS1500-shore	chr20:3148649-3149060	TRUE
cg04933530	-0.11994	0.292581	-4.23264	0.000712052	0.0372413	-0.864649	0.35255	0.232611	-0.11994	14	77419754	R	II		IGR	shelf	IGR-shelf	chr14:77422842-77423094	TRUE
cg04484984	0.165294	0.581714	4.23237	0.00071244	0.0372524	-0.865197	0.499067	0.664361	0.165294	3	122665848	R	II	SEMA5B	Body	opensea	Body-opensea			TRUE
cg08602218	0.119621	0.721788	4.22952	0.000716561	0.0373564	-0.870992	0.661978	0.781599	0.119621	10	23707382	F	II		IGR	opensea	IGR-opensea			TRUE
cg13316054	-0.142029	0.285199	-4.22944	0.000716685	0.0373569	-0.871166	0.356213	0.214185	-0.142029	10	63388439	F	II		IGR	opensea	IGR-opensea			TRUE
cg18592964	-0.113149	0.575075	-4.22913	0.000717124	0.0373626	-0.87178	0.63165	0.518501	-0.113149	5	96051476	R	II	CAST	Body	opensea	Body-opensea			TRUE
cg04958236	-0.135587	0.263042	-4.22869	0.000717777	0.0373724	-0.872696	0.330836	0.195248	-0.135587	6	74276973	F	II		IGR	opensea	IGR-opensea			TRUE
cg11113066	0.107576	0.292207	4.22822	0.000718457	0.037378	-0.873647	0.238419	0.345995	0.107576	10	101281981	R	I		IGR	island	IGR-island	chr10:101281181-101282116
cg05504729	0.101639	0.424008	4.22595	0.000721767	0.0374323	-0.878264	0.373188	0.474827	0.101639	16	89399490	F	II	ANKRD11	5'UTR	opensea	5'UTR-opensea			TRUE
cg13723731	0.114315	0.336378	4.22415	0.000724402	0.0375096	-0.881925	0.279221	0.393536	0.114315	8	61149576	R	II	CA8	Body	opensea	Body-opensea			TRUE
cg23665802	0.21106	0.289213	4.22214	0.000727359	0.0376026	-0.886018	0.183683	0.394743	0.21106	13	92002338	F	II	MIR19A	TSS1500	shore	TSS1500-shore	chr13:91999541-92001441				rs7984373
cg19934194	-0.142223	0.861452	-4.21886	0.000732219	0.0377471	-0.892707	0.932564	0.790341	-0.142223	7	6286149	R	II	CYTH3	Body	opensea	Body-opensea			TRUE
cg01081930	0.110025	0.557874	4.21819	0.000733201	0.0377769	-0.894053	0.502861	0.612886	0.110025	1	92284280	F	II	TGFBR3	Body	opensea	Body-opensea			TRUE
cg03221914	0.116459	0.274021	4.21679	0.00073529	0.0378359	-0.896912	0.215792	0.33225	0.116459	6	27783331	R	II	HIST1H2AJ	TSS1500	shore	TSS1500-shore	chr6:27782247-27782485
cg10851168	0.12768	0.388501	4.21463	0.000738514	0.0379276	-0.901305	0.324661	0.452341	0.12768	11	70317508	F	II	SHANK2	3'UTR	opensea	3'UTR-opensea		TRUE			rs534378
cg11883418	0.107665	0.597084	4.2121	0.000742314	0.0380253	-0.90646	0.543252	0.650916	0.107665	6	119069624	R	II		IGR	opensea	IGR-opensea			TRUE
cg13000789	0.161009	0.290102	4.21034	0.000744972	0.0381058	-0.91005	0.209598	0.370606	0.161009	6	56589255	F	II	DST	Body	opensea	Body-opensea			TRUE
cg21139150	0.144601	0.20985	4.20985	0.00074571	0.0381343	-0.911045	0.13755	0.28215	0.144601	21	46976175	F	I		IGR	island	IGR-island	chr21:46975415-46976341				rs8127385
cg21576003	0.116522	0.322055	4.20908	0.000746874	0.0381752	-0.912611	0.263794	0.380316	0.116522	5	6182368	F	I		IGR	opensea	IGR-opensea					rs13187994
cg15114510	0.106847	0.71283	4.20891	0.000747139	0.0381795	-0.912968	0.659407	0.766254	0.106847	11	10639944	R	II	MRVI1	Body	opensea	Body-opensea			TRUE
cg17359942	0.130228	0.67511	4.20691	0.000750175	0.038251	-0.91704	0.609996	0.740224	0.130228	10	103541607	F	II	NPM3	Body	shore	Body-shore	chr10:103542711-103543290		TRUE
cg22587600	0.155343	0.370193	4.20611	0.000751386	0.0382857	-0.91866	0.292521	0.447864	0.155343	2	46883368	R	II		IGR	opensea	IGR-opensea			TRUE
cg21775570	-0.118819	0.300352	-4.20575	0.000751942	0.0382947	-0.919403	0.359762	0.240943	-0.118819	1	2171834	R	II	SKI	Body	opensea	Body-opensea			TRUE
cg17836805	0.176072	0.623327	4.20555	0.000752243	0.0382986	-0.919804	0.535291	0.711363	0.176072	6	72190058	F	II		IGR	opensea	IGR-opensea			TRUE
cg03997039	0.100389	0.785502	4.20552	0.000752291	0.0382986	-0.919869	0.735307	0.835696	0.100389	16	29703361	F	II	QPRT	Body	shelf	Body-shelf	chr16:29706198-29706458	TRUE
cg11407612	0.100347	0.830215	4.20439	0.000754005	0.0383487	-0.922154	0.780041	0.880388	0.100347	8	1794627	R	II	ARHGEF10	Body	shelf	Body-shelf	chr8:1797406-1798775		TRUE
cg18343556	0.137857	0.343241	4.20428	0.000754173	0.0383526	-0.922378	0.274313	0.412169	0.137857	3	50316384	R	II	C3orf45	TSS200	shore	TSS200-shore	chr3:50312687-50314419
cg20814616	0.108651	0.819601	4.20349	0.000755397	0.0383824	-0.924006	0.765275	0.873926	0.108651	7	94014465	F	II		IGR	opensea	IGR-opensea			TRUE		rs4729128
cg01618697	0.130702	0.340692	4.20271	0.000756578	0.0384146	-0.925575	0.275341	0.406043	0.130702	7	2913864	R	II		IGR	opensea	IGR-opensea		TRUE	TRUE			rs73035221
cg03004417	0.108135	0.585499	4.20109	0.000759074	0.0384895	-0.928882	0.531432	0.639567	0.108135	11	61357547	R	II		IGR	shelf	IGR-shelf	chr11:61355038-61355363
cg10847673	0.125344	0.345451	4.20104	0.000759151	0.0384895	-0.928985	0.282779	0.408122	0.125344	10	111929033	F	II		IGR	opensea	IGR-opensea			TRUE		rs76182267
cg15876825	-0.160139	0.635626	-4.19986	0.000760973	0.0385447	-0.931392	0.715696	0.555557	-0.160139	3	11651881	F	I	VGLL4	Body	opensea	Body-opensea			TRUE		rs11708985
cg05299094	0.140684	0.298301	4.198	0.000763855	0.0386569	-0.935188	0.227959	0.368643	0.140684	6	27521218	F	II		IGR	opensea	IGR-opensea
cg13428086	0.121349	0.566873	4.19795	0.000763924	0.0386569	-0.935278	0.506199	0.627548	0.121349	1	10743216	R	II	CASZ1	Body	opensea	Body-opensea			TRUE
cg00533390	0.105187	0.612808	4.19777	0.000764204	0.0386598	-0.935646	0.560215	0.665401	0.105187	1	245028657	F	II	HNRNPU	TSS1500	shore	TSS1500-shore	chr1:245026434-245028020
cg11013714	0.10176	0.712442	4.19754	0.000764558	0.0386598	-0.936112	0.661562	0.763322	0.10176	3	138128339	F	II		IGR	opensea	IGR-opensea			TRUE
cg15664152	0.103624	0.312321	4.19641	0.000766318	0.0387109	-0.938421	0.260509	0.364133	0.103624	7	129008407	R	II	AHCYL2	Body	opensea	Body-opensea			TRUE
cg01431063	0.10982	0.461076	4.19548	0.000767764	0.0387534	-0.940313	0.406166	0.515986	0.10982	10	115860903	F	II		IGR	island	IGR-island	chr10:115860679-115861093		TRUE		rs12783973
cg07612986	0.107416	0.647334	4.1939	0.000770223	0.0388228	-0.943524	0.593626	0.701042	0.107416	3	44283035	F	II	C3orf77	TSS1500	shore	TSS1500-shore	chr3:44283239-44283838
cg08510718	-0.1217	0.781461	-4.19335	0.000771094	0.0388322	-0.944658	0.842311	0.720611	-0.1217	3	13019649	F	II	IQSEC1	Body	opensea	Body-opensea			TRUE
cg20174247	0.112482	0.451579	4.1933	0.00077117	0.0388322	-0.944758	0.395338	0.50782	0.112482	10	14032690	F	II	FRMD4A	Body	opensea	Body-opensea			TRUE
cg08770647	0.112082	0.321164	4.19315	0.0007714	0.0388344	-0.945058	0.265123	0.377205	0.112082	11	124768845	R	II	ROBO4	TSS1500	opensea	TSS1500-opensea		TRUE
cg03801871	0.11389	0.5618	4.19216	0.000772947	0.0388788	-0.947069	0.504855	0.618745	0.11389	2	30453395	R	II	LBH	TSS1500	shore	TSS1500-shore	chr2:30453566-30455655
cg08774452	0.154903	0.553203	4.19178	0.000773555	0.0388871	-0.947858	0.475752	0.630655	0.154903	12	128850550	R	II	TMEM132C	Body	island	Body-island	chr12:128850549-128850755		TRUE
cg11038231	0.144817	0.693664	4.19072	0.000775208	0.0389283	-0.950001	0.621256	0.766073	0.144817	11	101576844	F	II		IGR	opensea	IGR-opensea			TRUE
cg04434244	0.16218	0.583741	4.19031	0.000775851	0.038942	-0.950834	0.502651	0.664831	0.16218	6	166232960	F	II		IGR	opensea	IGR-opensea			TRUE
cg02086690	0.277125	0.588316	4.18775	0.000779906	0.0390536	-0.956068	0.449753	0.726878	0.277125	1	56756750	R	II		IGR	opensea	IGR-opensea			TRUE
cg02978544	-0.102763	0.4969	-4.18756	0.000780201	0.0390536	-0.956447	0.548282	0.445519	-0.102763	16	19716338	F	II		IGR	opensea	IGR-opensea			TRUE
cg04689773	-0.122453	0.563388	-4.18751	0.000780277	0.0390536	-0.956545	0.624615	0.502162	-0.122453	14	92199710	R	II	CATSPERB	TSS1500	opensea	TSS1500-opensea
cg24704287	-0.136677	0.329388	-4.18598	0.000782708	0.0391016	-0.959667	0.397726	0.261049	-0.136677	19	13951481	R	I		IGR	shore	IGR-shore	chr19:13953222-13953554
cg20340007	0.10641	0.684354	4.18591	0.00078282	0.0391016	-0.959811	0.631149	0.737559	0.10641	11	122602982	F	II	UBASH3B	Body	opensea	Body-opensea			TRUE
cg05453924	-0.151563	0.493541	-4.18589	0.000782841	0.0391016	-0.959839	0.569322	0.41776	-0.151563	13	24079390	R	II		IGR	opensea	IGR-opensea			TRUE
cg01839452	0.147412	0.36516	4.18491	0.000784415	0.0391328	-0.961856	0.291454	0.438866	0.147412	14	22433489	R	II		IGR	opensea	IGR-opensea						rs80103448
cg15171154	0.101596	0.729267	4.18488	0.000784452	0.0391328	-0.961902	0.678469	0.780065	0.101596	3	30722557	F	II	TGFBR2	Body	opensea	Body-opensea			TRUE
cg02927655	-0.140128	0.359963	-4.18466	0.000784802	0.0391328	-0.962351	0.430026	0.289899	-0.140128	12	27167667	F	II	TM7SF3	TSS1500	shore	TSS1500-shore	chr12:27166996-27167464
cg26101485	0.116768	0.312465	4.18362	0.00078646	0.03918	-0.964469	0.25408	0.370849	0.116768	8	142264769	F	I		IGR	shore	IGR-shore	chr8:142262456-142263238	TRUE
cg25104397	0.102382	0.318005	4.18247	0.000788298	0.0392484	-0.966812	0.266813	0.369196	0.102382	10	104535920	R	II	C10orf26	5'UTR	opensea	5'UTR-opensea			TRUE	low-CpG:104525908-104526111
cg12729166	0.165338	0.751362	4.18196	0.000789122	0.0392676	-0.967861	0.668693	0.834031	0.165338	1	100110390	F	II	PALMD	TSS1500	opensea	TSS1500-opensea
cg04034685	0.128415	0.513607	4.1818	0.000789368	0.0392691	-0.968174	0.449399	0.577814	0.128415	17	62085532	R	II	ICAM2	TSS1500	opensea	TSS1500-opensea			TRUE
cg09079580	0.115264	0.197109	4.18098	0.000790682	0.0393231	-0.969844	0.139477	0.254741	0.115264	16	49317767	F	II		IGR	shore	IGR-shore	chr16:49314037-49316543
cg10220544	0.149929	0.539186	4.18089	0.000790827	0.0393231	-0.970028	0.464221	0.61415	0.149929	1	60171660	F	II	FGGY	Body	opensea	Body-opensea			TRUE
cg24243265	0.159313	0.628913	4.18012	0.000792075	0.0393467	-0.971611	0.549257	0.70857	0.159313	8	130799851	F	II	GSDMC	TSS1500	opensea	TSS1500-opensea
cg25729692	0.107159	0.802706	4.17921	0.000793543	0.0393907	-0.973469	0.749126	0.856285	0.107159	1	207473976	F	II		IGR	opensea	IGR-opensea			TRUE		rs17024765
cg08661751	0.137173	0.738586	4.17858	0.000794556	0.0394025	-0.974751	0.669999	0.807173	0.137173	5	142001770	F	II	FGF1	5'UTR	opensea	5'UTR-opensea			TRUE
cg13049326	0.103424	0.561373	4.17839	0.000794859	0.0394025	-0.975132	0.509661	0.613085	0.103424	X	153061265	R	II	IDH3G	TSS1500	shore	TSS1500-shore	chrX:153059275-153060557
cg09676794	0.135423	0.58045	4.17751	0.000796286	0.03945	-0.976933	0.512739	0.648162	0.135423	13	100310162	R	II	CLYBL	Body	shore	Body-shore	chr13:100310204-100310446		TRUE		rs79826365
cg13038685	0.119647	0.460761	4.1757	0.000799213	0.0395206	-0.980616	0.400938	0.520585	0.119647	14	77504478	F	II		IGR	opensea	IGR-opensea			TRUE
cg06611426	0.123298	0.21211	4.17563	0.000799323	0.0395214	-0.980754	0.150461	0.273759	0.123298	12	52404161	R	I	GRASP	Body	shelf	Body-shelf	chr12:52400467-52401696	TRUE	TRUE
cg24605325	0.129331	0.394311	4.17428	0.000801513	0.0395652	-0.983501	0.329646	0.458977	0.129331	2	128168798	R	II		IGR	shelf	IGR-shelf	chr2:128165848-128166198	TRUE
cg09232555	0.118983	0.556986	4.17395	0.000802054	0.0395652	-0.984178	0.497495	0.616478	0.118983	8	11619866	R	I		IGR	opensea	IGR-opensea		TRUE
cg23053573	0.175822	0.392188	4.1738	0.000802296	0.0395707	-0.98448	0.304276	0.480099	0.175822	1	26662567	F	I	AIM1L	Body	island	Body-island	chr1:26662538-26663466	TRUE
cg00087971	0.162641	0.548755	4.17187	0.00080545	0.0396579	-0.988419	0.467434	0.630075	0.162641	6	52225096	F	II		IGR	shore	IGR-shore	chr6:52226753-52228006
cg03299824	0.126536	0.571174	4.17129	0.000806391	0.0396844	-0.989592	0.507906	0.634442	0.126536	16	17647941	R	I		IGR	opensea	IGR-opensea			TRUE
cg21844749	0.101158	0.64917	4.17069	0.000807386	0.0397054	-0.990828	0.598591	0.699749	0.101158	8	15431358	F	II	TUSC3	Body	opensea	Body-opensea			TRUE
cg16658020	0.148721	0.439682	4.16845	0.00081106	0.0398024	-0.995386	0.365321	0.514042	0.148721	17	39203641	F	II	KRTAP2-1	TSS200	opensea	TSS200-opensea
cg16397176	0.109616	0.288635	4.16705	0.000813365	0.039869	-0.998234	0.233828	0.343443	0.109616	5	110899314	R	II		IGR	opensea	IGR-opensea			TRUE
cg08622198	-0.117968	0.159475	-4.16533	0.000816223	0.0399347	-1.00175	0.218459	0.100491	-0.117968	1	239979505	F	II	CHRM3	5'UTR	opensea	5'UTR-opensea			TRUE		rs74149217
cg02902415	0.157509	0.376228	4.16477	0.000817145	0.0399612	-1.00289	0.297474	0.454982	0.157509	1	110088541	F	II		IGR	shelf	IGR-shelf	chr1:110091039-110091590
cg23333146	0.127425	0.792082	4.1645	0.0008176	0.0399724	-1.00345	0.728369	0.855794	0.127425	3	71731211	F	II	EIF4E3	3'UTR	opensea	3'UTR-opensea			TRUE
cg16721427	0.110578	0.336507	4.1644	0.000817755	0.0399724	-1.00364	0.281218	0.391796	0.110578	2	4050797	R	II		IGR	island	IGR-island	chr2:4050649-4050852
cg14519392	0.114208	0.783246	4.1641	0.000818263	0.039988	-1.00426	0.726142	0.84035	0.114208	6	4140258	R	II		IGR	shelf	IGR-shelf	chr6:4135175-4136460
cg19183879	0.114969	0.349434	4.16363	0.000819039	0.0400073	-1.00521	0.291949	0.406918	0.114969	15	85880815	R	II		IGR	opensea	IGR-opensea			TRUE
cg08194369	0.136041	0.599986	4.16308	0.000819961	0.0400338	-1.00634	0.531966	0.668007	0.136041	2	202564914	R	II	MPP4	TSS1500	opensea	TSS1500-opensea			TRUE		rs75853327
cg27552599	0.115394	0.416299	4.15777	0.000828845	0.0402202	-1.01715	0.358602	0.473996	0.115394	20	37590471	R	II	DHX35	TSS1500	shore	TSS1500-shore	chr20:37590617-37591184
cg18561684	-0.110442	0.617906	-4.1573	0.000829637	0.0402354	-1.01811	0.673127	0.562685	-0.110442	2	100627285	F	II	AFF3	Body	opensea	Body-opensea			TRUE			rs78177784
cg16989719	0.12715	0.385497	4.15696	0.000830207	0.0402491	-1.0188	0.321922	0.449072	0.12715	2	238392110	F	II		IGR	shelf	IGR-shelf	chr2:238395061-238396241	TRUE	TRUE		rs79112594
cg22509807	0.189895	0.593043	4.15672	0.000830611	0.0402594	-1.01929	0.498095	0.68799	0.189895	3	179870362	R	II		IGR	opensea	IGR-opensea			TRUE
cg14375924	0.112415	0.711205	4.15584	0.000832105	0.0402949	-1.02109	0.654997	0.767412	0.112415	12	24168200	R	II	SOX5	5'UTR	opensea	5'UTR-opensea			TRUE
cg02768048	0.169867	0.630322	4.15577	0.000832217	0.0402949	-1.02123	0.545388	0.715256	0.169867	5	95166697	F	II		IGR	shelf	IGR-shelf	chr5:95170617-95170855
cg15481493	0.101561	0.774567	4.15332	0.000836377	0.0404082	-1.02623	0.723787	0.825348	0.101561	11	35133274	R	II		IGR	opensea	IGR-opensea		TRUE	TRUE
cg02824817	0.120689	0.80917	4.15248	0.000837814	0.0404501	-1.02795	0.748825	0.869514	0.120689	4	170265309	R	II		IGR	opensea	IGR-opensea			TRUE
cg11321083	-0.104454	0.140605	-4.15221	0.000838273	0.0404631	-1.0285	0.192832	0.0883781	-0.104454	11	64638190	F	II	EHD1	Body	opensea	Body-opensea		TRUE	TRUE
cg04132472	-0.102434	0.792168	-4.14937	0.000843113	0.0405942	-1.03428	0.843385	0.740951	-0.102434	17	19861366	F	II	AKAP10	Body	opensea	Body-opensea		TRUE	TRUE
cg27532360	0.100632	0.582653	4.14802	0.000845432	0.0406858	-1.03704	0.532337	0.632969	0.100632	17	42452994	R	II	ITGA2B	Body	opensea	Body-opensea		TRUE	TRUE
cg26262197	0.163315	0.719509	4.14756	0.00084622	0.0407111	-1.03797	0.637851	0.801166	0.163315	11	115115297	F	II	CADM1	Body	opensea	Body-opensea			TRUE
cg22138096	0.111982	0.551177	4.1471	0.000847014	0.0407261	-1.03891	0.495186	0.607168	0.111982	7	41772439	R	II	LOC285954	Body	opensea	Body-opensea			TRUE
cg09971674	0.105074	0.807698	4.14693	0.000847308	0.0407334	-1.03926	0.755161	0.860235	0.105074	15	58853142	R	II	LIPC	Body	opensea	Body-opensea			TRUE
cg22027725	-0.126858	0.291541	-4.14603	0.000848865	0.040771	-1.0411	0.35497	0.228112	-0.126858	11	124961633	R	II		IGR	opensea	IGR-opensea		TRUE	TRUE
cg22626525	0.119414	0.523844	4.14326	0.000853656	0.0409005	-1.04675	0.464137	0.583551	0.119414	1	20008900	F	II	TMCO4	3'UTR	shelf	3'UTR-shelf	chr1:20005510-20005865	TRUE
cg14270346	0.148269	0.331634	4.14308	0.000853971	0.0409063	-1.04712	0.257499	0.405769	0.148269	9	38026076	F	II	SHB	Body	opensea	Body-opensea		TRUE	TRUE
cg18623355	-0.117785	0.458966	-4.14249	0.000854989	0.0409365	-1.04831	0.517859	0.400074	-0.117785	12	116808922	F	II		IGR	opensea	IGR-opensea
cg09470010	-0.101111	0.446702	-4.14187	0.00085607	0.0409578	-1.04958	0.497257	0.396146	-0.101111	10	104094152	F	II	GBF1	Body	opensea	Body-opensea			TRUE
cg07906193	0.154066	0.624027	4.14152	0.000856675	0.0409612	-1.05029	0.546994	0.70106	0.154066	10	126599966	R	II		IGR	opensea	IGR-opensea			TRUE
cg13294447	0.112958	0.500138	4.14107	0.000857464	0.0409897	-1.05121	0.443659	0.556618	0.112958	12	51029261	R	II	DIP2B	Body	opensea	Body-opensea			TRUE
cg24726370	0.147353	0.590192	4.14013	0.00085911	0.0410403	-1.05314	0.516515	0.663868	0.147353	7	56855495	F	I		IGR	island	IGR-island	chr7:56855145-56855500				rs74749813
cg15924738	0.111223	0.425802	4.1399	0.000859496	0.0410448	-1.05359	0.370191	0.481414	0.111223	14	33296030	R	II	AKAP6	3'UTR	opensea	3'UTR-opensea			TRUE
cg24501758	-0.112336	0.663682	-4.1396	0.00086003	0.041061	-1.05421	0.71985	0.607514	-0.112336	4	128778381	F	II		IGR	opensea	IGR-opensea			TRUE
cg02627352	0.144224	0.755415	4.1385	0.000861946	0.0411194	-1.05644	0.683303	0.827527	0.144224	3	9267381	R	II	SRGAP3	Body	opensea	Body-opensea			TRUE
cg10299214	0.164554	0.424051	4.13823	0.000862422	0.0411285	-1.057	0.341774	0.506327	0.164554	4	186000492	R	II		IGR	opensea	IGR-opensea			TRUE
cg24428218	0.128952	0.504582	4.13706	0.000864472	0.0411517	-1.05938	0.440106	0.569058	0.128952	10	126303795	R	II		IGR	island	IGR-island	chr10:126303794-126304213
cg09177080	-0.106095	0.37315	-4.13685	0.000864847	0.0411579	-1.05981	0.426198	0.320102	-0.106095	17	73840822	R	II	UNC13D	TSS200	opensea	TSS200-opensea			TRUE
cg17965737	0.188949	0.590174	4.13475	0.000868553	0.0412318	-1.0641	0.4957	0.684649	0.188949	1	244208721	R	II		IGR	shelf	IGR-shelf	chr1:244211034-244212088
cg13430450	0.110228	0.393472	4.13445	0.000869074	0.0412447	-1.0647	0.338358	0.448587	0.110228	9	107691064	R	II	ABCA1	TSS1500	shore	TSS1500-shore	chr9:107689847-107690798
cg02222860	0.110665	0.851916	4.1342	0.000869514	0.0412536	-1.06521	0.796583	0.907248	0.110665	13	22773590	R	II		IGR	opensea	IGR-opensea			TRUE
cg14623754	0.133216	0.524128	4.13414	0.000869621	0.0412536	-1.06534	0.45752	0.590736	0.133216	9	117228122	F	II	DFNB31	Body	opensea	Body-opensea			TRUE
cg06810231	0.16527	0.352756	4.13367	0.000870453	0.0412545	-1.0663	0.270122	0.435391	0.16527	14	51906822	F	II		IGR	opensea	IGR-opensea			TRUE
cg16110788	0.127934	0.566086	4.13329	0.000871134	0.0412634	-1.06708	0.502119	0.630053	0.127934	7	22602133	F	II		IGR	opensea	IGR-opensea			TRUE
cg21146957	-0.152786	0.673325	-4.13274	0.000872108	0.0413002	-1.0682	0.749718	0.596932	-0.152786	12	80838996	F	II	PTPRQ	Body	opensea	Body-opensea			TRUE
cg16025492	0.112939	0.725857	4.13235	0.0008728	0.0413283	-1.069	0.669388	0.782327	0.112939	5	114764748	R	II		IGR	opensea	IGR-opensea			TRUE
cg18016304	0.122301	0.414245	4.13184	0.000873704	0.0413414	-1.07004	0.353094	0.475395	0.122301	15	31287286	F	I		IGR	shelf	IGR-shelf	chr15:31283404-31284414					rs72710442
cg00463957	0.108916	0.637681	4.1317	0.00087396	0.0413414	-1.07033	0.583223	0.692139	0.108916	16	14583487	F	II	PARN	Body	opensea	Body-opensea			TRUE
cg18534077	0.102565	0.462291	4.13146	0.000874378	0.0413472	-1.07081	0.411009	0.513574	0.102565	10	104628846	F	II	AS3MT	TSS1500	shore	TSS1500-shore	chr10:104629038-104629479				rs7085104
cg27219973	0.129041	0.304641	4.12877	0.000879184	0.041483	-1.07631	0.24012	0.369161	0.129041	4	68622191	F	II	GNRHR	TSS1500	opensea	TSS1500-opensea
cg09174555	0.127812	0.476579	4.12874	0.000879222	0.041483	-1.07635	0.412673	0.540485	0.127812	1	153364020	F	II	S100A8	TSS1500	opensea	TSS1500-opensea
cg06960461	0.199579	0.464035	4.12742	0.000881599	0.0415556	-1.07906	0.364245	0.563824	0.199579	12	132950559	R	II		IGR	opensea	IGR-opensea
cg17394530	0.101538	0.542114	4.12275	0.000890005	0.0417716	-1.08858	0.491345	0.592883	0.101538	6	106434623	R	II		IGR	shore	IGR-shore	chr6:106433984-106434459		TRUE
cg18736739	0.174586	0.435379	4.12247	0.000890505	0.0417716	-1.08914	0.348085	0.522672	0.174586	3	185119685	F	II	MAP3K13	5'UTR	opensea	5'UTR-opensea			TRUE
cg06639544	0.14244	0.493574	4.12051	0.000894071	0.0418924	-1.09315	0.422354	0.564794	0.14244	19	14940319	F	II	OR7A5	TSS1500	opensea	TSS1500-opensea
cg13599248	-0.110625	0.250528	-4.12044	0.000894198	0.0418937	-1.09329	0.305841	0.195216	-0.110625	6	74364700	F	II	SLC17A5	TSS1500	shore	TSS1500-shore	chr6:74363202-74364006
cg15486183	0.117805	0.645343	4.11992	0.000895141	0.0418973	-1.09435	0.586441	0.704246	0.117805	19	55902100	R	II	RPL28	Body	shelf	Body-shelf	chr19:55895262-55898164		TRUE
cg12733040	0.178909	0.515747	4.1194	0.000896085	0.0419235	-1.0954	0.426292	0.605201	0.178909	22	17303493	F	II	XKR3	TSS1500	opensea	TSS1500-opensea					rs34868211	rs34126385
cg00353330	0.168864	0.351607	4.1193	0.000896282	0.0419235	-1.09562	0.267175	0.436039	0.168864	4	101715708	R	II		IGR	opensea	IGR-opensea			TRUE
cg08836825	0.114545	0.805413	4.11787	0.000898891	0.0420013	-1.09854	0.748141	0.862686	0.114545	6	82726757	R	II		IGR	opensea	IGR-opensea			TRUE
cg09838823	0.118794	0.538488	4.11718	0.000900149	0.0420189	-1.09994	0.479091	0.597885	0.118794	17	27536230	F	II		IGR	opensea	IGR-opensea			TRUE
cg09871261	0.127583	0.712182	4.1171	0.000900295	0.0420189	-1.1001	0.64839	0.775973	0.127583	1	162063901	R	II	NOS1AP	Body	opensea	Body-opensea			TRUE
cg15001547	0.11685	0.662443	4.11706	0.000900366	0.0420189	-1.10018	0.604018	0.720868	0.11685	19	14138994	F	II	RLN3	TSS200	shelf	TSS200-shelf	chr19:14142398-14142977				rs1982632
cg27234129	0.105242	0.182655	4.11686	0.000900733	0.0420243	-1.10059	0.130035	0.235276	0.105242	1	111683960	F	II	DRAM2	TSS1500	shore	TSS1500-shore	chr1:111682227-111683303
cg13222915	0.106812	0.549117	4.11625	0.000901848	0.0420457	-1.10183	0.495711	0.602523	0.106812	1	184598594	R	II		IGR	opensea	IGR-opensea			TRUE
cg22291974	0.129759	0.410973	4.11597	0.000902374	0.0420525	-1.10242	0.346093	0.475852	0.129759	3	52048820	R	II		IGR	opensea	IGR-opensea			TRUE
cg20745620	0.181454	0.658667	4.1159	0.000902487	0.0420525	-1.10254	0.567941	0.749394	0.181454	5	172203954	F	II		IGR	opensea	IGR-opensea			TRUE
cg04055086	0.105524	0.783536	4.11582	0.000902635	0.0420525	-1.10271	0.730774	0.836298	0.105524	2	110365472	R	II	SEPT10	Body	opensea	Body-opensea			TRUE
cg12127863	0.10086	0.549558	4.11528	0.000903643	0.0420831	-1.10382	0.499128	0.599988	0.10086	13	100252695	F	II		IGR	opensea	IGR-opensea			TRUE
cg07644184	0.143332	0.626454	4.11498	0.000904189	0.0420963	-1.10443	0.554788	0.69812	0.143332	3	71265048	R	II	FOXP1	5'UTR	opensea	5'UTR-opensea			TRUE
cg00162001	0.15921	0.530101	4.11492	0.0009043	0.0420963	-1.10455	0.450496	0.609706	0.15921	2	42479385	F	II	EML4	Body	opensea	Body-opensea			TRUE
cg03978041	0.103563	0.767954	4.1148	0.000904516	0.0421005	-1.10479	0.716172	0.819735	0.103563	1	200862726	R	II	C1orf106	TSS1500	shelf	TSS1500-shelf	chr1:200860076-200860576
cg09966895	0.155693	0.549866	4.11418	0.000905656	0.042121	-1.10606	0.47202	0.627713	0.155693	11	78738326	R	II	ODZ4	Body	opensea	Body-opensea			TRUE
cg26856257	0.126315	0.247283	4.1135	0.000906908	0.0421559	-1.10744	0.184125	0.31044	0.126315	1	32805350	R	II		IGR	shelf	IGR-shelf	chr1:32800859-32802229
cg06155341	0.121098	0.349925	4.11306	0.00090773	0.0421708	-1.10835	0.289376	0.410474	0.121098	11	66048759	R	II	CNIH2	Body	shore	Body-shore	chr11:66049750-66050229		TRUE
cg00741695	0.170742	0.604888	4.11204	0.000909621	0.0422018	-1.11044	0.519517	0.690258	0.170742	6	961559	R	II	LOC285768	Body	opensea	Body-opensea			TRUE
cg11886884	0.151711	0.4665	4.11172	0.000910201	0.0422203	-1.11108	0.390645	0.542356	0.151711	3	138062860	F	II		IGR	shelf	IGR-shelf	chr3:138066795-138067854
cg26026951	0.156742	0.643391	4.11047	0.000912525	0.0422676	-1.11363	0.56502	0.721762	0.156742	1	95408771	R	II		IGR	opensea	IGR-opensea
cg10362869	0.119752	0.521067	4.10878	0.000915675	0.0423622	-1.11709	0.461191	0.580943	0.119752	2	134326913	R	II	NCKAP5	TSS1500	opensea	TSS1500-opensea
cg27360158	-0.107521	0.341977	-4.1084	0.000916369	0.0423834	-1.11785	0.395738	0.288217	-0.107521	X	41133058	R	II		IGR	shelf	IGR-shelf	chrX:41135116-41135669
cg24703336	0.156667	0.400821	4.10373	0.000925122	0.0426352	-1.12738	0.322488	0.479155	0.156667	12	5257426	R	II		IGR	opensea	IGR-opensea			TRUE
cg09323768	-0.164641	0.671805	-4.10319	0.000926146	0.0426505	-1.12849	0.754125	0.589485	-0.164641	6	3739913	F	II	C6orf145	Body	opensea	Body-opensea			TRUE		rs9328188
cg04944393	0.182924	0.601112	4.10318	0.000926165	0.0426505	-1.12851	0.50965	0.692574	0.182924	2	46748208	R	II	ATP6V1E2	TSS1500	opensea	TSS1500-opensea			TRUE
cg13440206	-0.139995	0.283619	-4.10152	0.0009293	0.0427481	-1.1319	0.353616	0.213621	-0.139995	9	133736192	R	II	ABL1	Body	shore	Body-shore	chr9:133738154-133738408	TRUE
cg25738301	0.100908	0.720436	4.10025	0.000931713	0.0428161	-1.1345	0.669982	0.770891	0.100908	12	104532524	F	II	NFYB	TSS1500	island	TSS1500-island	chr12:104531174-104532539
cg06440041	0.136601	0.44955	4.0993	0.000933503	0.0428302	-1.13642	0.38125	0.51785	0.136601	10	81209907	R	II		IGR	opensea	IGR-opensea			TRUE
cg02604211	0.124966	0.516993	4.09929	0.000933527	0.0428302	-1.13645	0.454509	0.579476	0.124966	11	27453034	R	II	LGR4	Body	opensea	Body-opensea			TRUE
cg18792365	-0.103319	0.359966	-4.09797	0.000936033	0.0429041	-1.13913	0.411625	0.308307	-0.103319	8	13132967	F	II	DLC1	Body	shore	Body-shore	chr8:13133842-13134312		TRUE
cg23873430	0.133397	0.507882	4.09731	0.000937298	0.0429083	-1.14049	0.441184	0.574581	0.133397	X	110655626	F	I	DCX	TSS1500	opensea	TSS1500-opensea					rs5943149
cg00608548	-0.118345	0.682585	-4.0973	0.000937322	0.0429083	-1.14051	0.741757	0.623413	-0.118345	19	40972521	R	II	SPTBN4	TSS1500	island	TSS1500-island	chr19:40971476-40973393
cg06397398	0.11927	0.629309	4.09534	0.000941056	0.0429928	-1.1445	0.569673	0.688944	0.11927	19	54023732	R	II	ZNF331	TSS1500	shore	TSS1500-shore	chr19:54023868-54024560
cg17679743	0.112406	0.28469	4.095	0.000941724	0.0430079	-1.14521	0.228487	0.340893	0.112406	17	76268136	F	II		IGR	opensea	IGR-opensea
cg25943719	0.103794	0.702533	4.09446	0.000942753	0.0430329	-1.1463	0.650636	0.754429	0.103794	15	101421391	R	II	ALDH1A3	Body	shore	Body-shore	chr15:101419261-101421133		TRUE
cg18033333	-0.157109	0.649557	-4.09404	0.000943557	0.0430572	-1.14716	0.728112	0.571002	-0.157109	4	85604328	R	II	WDFY3	TSS1500	opensea	TSS1500-opensea			TRUE
cg10667102	-0.102123	0.281469	-4.09402	0.000943591	0.0430572	-1.1472	0.33253	0.230407	-0.102123	19	1265458	R	I		IGR	shore	IGR-shore	chr19:1265854-1269943	TRUE
cg20250250	0.165352	0.751546	4.09391	0.000943817	0.0430606	-1.14743	0.66887	0.834222	0.165352	14	100479169	F	II		IGR	opensea	IGR-opensea			TRUE
cg15033113	0.133707	0.676498	4.09258	0.000946372	0.0431495	-1.15014	0.609644	0.743351	0.133707	18	45279117	F	II		IGR	shelf	IGR-shelf	chr18:45275405-45275812
cg03893901	0.190354	0.391461	4.09197	0.000947541	0.0431672	-1.15138	0.296284	0.486638	0.190354	6	106498597	R	II		IGR	opensea	IGR-opensea			TRUE			rs76447339
cg22489510	-0.107501	0.200617	-4.09101	0.000949396	0.0432143	-1.15334	0.254367	0.146866	-0.107501	2	8675599	F	II		IGR	opensea	IGR-opensea		TRUE	TRUE
cg06672545	0.121136	0.865982	4.09086	0.000949695	0.0432228	-1.15366	0.805414	0.92655	0.121136	16	19869965	R	II		IGR	opensea	IGR-opensea
cg09000257	-0.153058	0.437419	-4.0898	0.000951732	0.0432504	-1.15581	0.513948	0.36089	-0.153058	10	29182093	R	II		IGR	opensea	IGR-opensea			TRUE
cg07823273	0.122343	0.642532	4.08889	0.000953513	0.0432708	-1.15768	0.58136	0.703703	0.122343	19	39695065	R	II	SYCN	TSS200	shore	TSS200-shore	chr19:39694476-39694994
cg24000333	0.107768	0.62372	4.08881	0.000953669	0.0432708	-1.15784	0.569836	0.677604	0.107768	14	81158339	R	II	C14orf145	Body	opensea	Body-opensea			TRUE
cg04880751	-0.146033	0.344026	-4.08857	0.000954132	0.0432708	-1.15833	0.417042	0.27101	-0.146033	1	241695164	F	II	KMO	TSS1500	opensea	TSS1500-opensea
cg11845292	0.113061	0.477423	4.08856	0.000954145	0.0432708	-1.15834	0.420892	0.533953	0.113061	11	86651225	F	II		IGR	opensea	IGR-opensea			TRUE
cg17254383	-0.127949	0.777434	-4.08807	0.000955098	0.0432958	-1.15934	0.841408	0.71346	-0.127949	17	53363128	R	II	HLF	Body	opensea	Body-opensea			TRUE
cg25298189	-0.120073	0.47892	-4.08418	0.000962695	0.0435043	-1.16728	0.538956	0.418883	-0.120073	19	935259	R	II	ARID3A	Body	shelf	Body-shelf	chr19:932598-932845	TRUE
cg01111006	0.120924	0.775317	4.08292	0.000965162	0.043583	-1.16985	0.714855	0.835779	0.120924	6	11161658	F	II		IGR	opensea	IGR-opensea			TRUE
cg23205886	0.135404	0.27579	4.08278	0.000965444	0.0435899	-1.17014	0.208088	0.343492	0.135404	5	138611766	F	II	SNHG4	Body	shore	Body-shore	chr5:138609320-138609851		TRUE
cg12737497	0.10862	0.263513	4.08213	0.000966724	0.0436174	-1.17147	0.209202	0.317823	0.10862	18	56530420	F	II	ZNF532	5'UTR	island	5'UTR-island	chr18:56530395-56531288	TRUE
cg03268012	0.104112	0.684142	4.08044	0.000970049	0.0437015	-1.17491	0.632086	0.736197	0.104112	13	52207556	R	II	WDFY2	Body	opensea	Body-opensea			TRUE
cg12032648	0.102909	0.791483	4.08038	0.000970175	0.0437015	-1.17504	0.740028	0.842938	0.102909	2	166676897	R	II		IGR	opensea	IGR-opensea			TRUE
cg26113278	0.173027	0.365293	4.07869	0.000973524	0.0437661	-1.1785	0.278779	0.451806	0.173027	1	54484669	R	II	LDLRAD1	TSS1500	opensea	TSS1500-opensea
cg19418922	0.123285	0.584152	4.0773	0.000976275	0.0438355	-1.18132	0.522509	0.645795	0.123285	11	44265840	R	II	EXT2	3'UTR	opensea	3'UTR-opensea			TRUE
cg02603876	0.187209	0.534937	4.07677	0.000977339	0.0438645	-1.18241	0.441333	0.628542	0.187209	16	30689847	R	II		IGR	opensea	IGR-opensea
cg12866769	0.12369	0.708808	4.0761	0.00097867	0.0438928	-1.18378	0.646962	0.770653	0.12369	15	67041828	F	I	SMAD6	Body	opensea	Body-opensea			TRUE
cg11175473	0.16962	0.545251	4.07596	0.000978954	0.0438928	-1.18407	0.460441	0.63006	0.16962	6	165933115	R	II	PDE10A	Body	opensea	Body-opensea			TRUE
cg11177552	0.105681	0.83379	4.07593	0.000979008	0.0438928	-1.18412	0.780949	0.88663	0.105681	3	25347174	F	II		IGR	opensea	IGR-opensea			TRUE
cg14094521	-0.159521	0.533391	-4.07521	0.000980458	0.0439363	-1.18561	0.613152	0.453631	-0.159521	1	246869082	R	II		IGR	opensea	IGR-opensea			TRUE
cg24911283	0.117872	0.759539	4.07508	0.000980701	0.0439377	-1.18586	0.700603	0.818475	0.117872	4	24780369	R	II		IGR	opensea	IGR-opensea			TRUE
cg16189217	0.124236	0.676114	4.07478	0.000981317	0.0439462	-1.18649	0.613996	0.738232	0.124236	13	101047235	R	II	PCCA	Body	opensea	Body-opensea			TRUE
cg02936931	0.148614	0.560379	4.07379	0.000983295	0.0440098	-1.1885	0.486072	0.634686	0.148614	6	134856977	F	II		IGR	opensea	IGR-opensea			TRUE
cg10411087	0.147547	0.455202	4.0724	0.000986075	0.0440873	-1.19133	0.381429	0.528976	0.147547	17	26799318	F	II	SLC13A2	TSS1500	opensea	TSS1500-opensea
cg21622709	0.102211	0.76512	4.07198	0.000986917	0.0440988	-1.19219	0.714014	0.816225	0.102211	12	66889098	F	II	GRIP1	Body	opensea	Body-opensea			TRUE
cg13424029	0.133088	0.511535	4.07191	0.000987065	0.0440988	-1.19234	0.444991	0.578079	0.133088	10	101297508	R	I		IGR	island	IGR-island	chr10:101297438-101297703	TRUE	TRUE
cg18533525	0.108531	0.381112	4.07001	0.0009909	0.0441842	-1.19622	0.326846	0.435378	0.108531	1	217581184	R	II		IGR	opensea	IGR-opensea			TRUE
cg09281580	0.121973	0.720267	4.06843	0.000994088	0.0442619	-1.19944	0.659281	0.781254	0.121973	15	85698777	R	II		IGR	opensea	IGR-opensea			TRUE
cg04305319	0.154334	0.558544	4.06781	0.000995337	0.0442803	-1.2007	0.481377	0.635711	0.154334	5	149698023	F	I		IGR	opensea	IGR-opensea			TRUE
cg18739392	0.129474	0.75369	4.0671	0.000996781	0.0443193	-1.20215	0.688953	0.818427	0.129474	5	138756226	F	II	DNAJC18	Body	opensea	Body-opensea			TRUE
cg20510033	-0.120625	0.557955	-4.06682	0.000997352	0.0443231	-1.20273	0.618267	0.497642	-0.120625	1	8960134	R	II		IGR	opensea	IGR-opensea		TRUE
cg23007087	-0.185724	0.44879	-4.06591	0.000999213	0.0443683	-1.20459	0.541652	0.355928	-0.185724	15	90380258	F	II	AP3S2	Body	opensea	Body-opensea		TRUE	TRUE
cg05614952	0.123372	0.717653	4.06566	0.000999715	0.0443812	-1.2051	0.655967	0.779339	0.123372	12	133384565	F	II	GOLGA3	Body	opensea	Body-opensea		TRUE
cg05374982	0.116939	0.565842	4.06452	0.00100205	0.0444237	-1.20743	0.507373	0.624312	0.116939	1	31376412	R	II	SDC3	Body	opensea	Body-opensea			TRUE
cg08061463	0.104325	0.21466	4.06443	0.00100223	0.0444237	-1.20761	0.162497	0.266822	0.104325	15	90789198	F	II		IGR	shelf	IGR-shelf	chr15:90792559-90792929
cg22202689	0.107851	0.325026	4.06382	0.00100348	0.0444544	-1.20886	0.271101	0.378951	0.107851	19	49298227	R	II		IGR	shore	IGR-shore	chr19:49298405-49298745		TRUE
cg13967908	0.183393	0.345549	4.0633	0.00100453	0.0444928	-1.20991	0.253852	0.437245	0.183393	9	117159457	F	II		IGR	shore	IGR-shore	chr9:117160139-117161064
cg13501538	0.10868	0.721605	4.06188	0.00100745	0.0445415	-1.21282	0.667265	0.775945	0.10868	6	1616430	F	II		IGR	shore	IGR-shore	chr6:1604606-1615866				rs74585983
cg12394706	0.112662	0.68639	4.06159	0.00100804	0.0445487	-1.21341	0.630059	0.742722	0.112662	8	99988676	R	II		IGR	shore	IGR-shore	chr8:99985733-99986983
cg26144999	0.119579	0.804156	4.05637	0.00101883	0.0448418	-1.22407	0.744366	0.863945	0.119579	13	34919279	R	II		IGR	opensea	IGR-opensea			TRUE
cg04968473	0.17034	0.562276	4.05614	0.00101931	0.0448487	-1.22454	0.477106	0.647446	0.17034	15	75040734	F	II	CYP1A2	TSS1500	opensea	TSS1500-opensea
cg13224758	0.169308	0.267253	4.05595	0.0010197	0.0448523	-1.22493	0.182599	0.351907	0.169308	3	31330036	F	II		IGR	opensea	IGR-opensea			TRUE
cg10699871	0.108926	0.576174	4.05565	0.00102032	0.0448678	-1.22554	0.521711	0.630637	0.108926	22	19879696	R	II	TXNRD2	Body	opensea	Body-opensea			TRUE			rs78998983
cg01571001	0.196573	0.60801	4.05265	0.00102658	0.0450149	-1.23166	0.509724	0.706296	0.196573	3	128215433	R	I		IGR	island	IGR-island	chr3:128215212-128216905	TRUE
cg00559001	0.187295	0.575329	4.05264	0.00102661	0.0450149	-1.23169	0.481682	0.668977	0.187295	5	17366028	R	II		IGR	opensea	IGR-opensea			TRUE
cg21690050	0.169153	0.731867	4.0522	0.00102752	0.045029	-1.23258	0.64729	0.816443	0.169153	1	61436657	F	II		IGR	opensea	IGR-opensea					rs7512783
cg06391412	0.100107	0.400482	4.05195	0.00102805	0.0450355	-1.23309	0.350428	0.450535	0.100107	3	71295684	R	II	FOXP1	5'UTR	opensea	5'UTR-opensea			TRUE
cg12449837	0.122486	0.54578	4.05159	0.00102881	0.0450548	-1.23383	0.484537	0.607023	0.122486	22	31364356	F	II	TUG1	TSS1500	shore	TSS1500-shore	chr22:31364564-31365575
cg01863674	0.121153	0.832241	4.05122	0.00102958	0.045069	-1.23458	0.771664	0.892817	0.121153	2	66765310	F	II	MEIS1	Body	opensea	Body-opensea			TRUE
cg02599006	0.13866	0.804212	4.05074	0.00103059	0.0450908	-1.23557	0.734883	0.873542	0.13866	2	28032311	F	II	RBKS	Body	opensea	Body-opensea			TRUE
cg06421526	0.125512	0.208499	4.05003	0.00103209	0.0451179	-1.23702	0.145743	0.271255	0.125512	17	43423130	R	II		IGR	opensea	IGR-opensea			TRUE
cg26980729	0.108568	0.65128	4.04874	0.00103481	0.0451766	-1.23966	0.596996	0.705564	0.108568	6	105379117	R	II		IGR	opensea	IGR-opensea			TRUE
cg06394082	0.119443	0.646891	4.0471	0.00103827	0.0452808	-1.243	0.58717	0.706613	0.119443	11	118767238	F	II	BCL9L	3'UTR	opensea	3'UTR-opensea			TRUE
cg19300650	0.116559	0.423665	4.04659	0.00103935	0.0453139	-1.24405	0.365386	0.481945	0.116559	1	171189771	F	II		IGR	opensea	IGR-opensea			TRUE
cg11385938	-0.138056	0.646882	-4.04621	0.00104015	0.0453343	-1.24481	0.71591	0.577854	-0.138056	7	6432590	R	I	RAC1	Body	opensea	Body-opensea			TRUE
cg05686950	0.124472	0.680447	4.04529	0.0010421	0.04538	-1.24669	0.618211	0.742684	0.124472	10	13657477	F	II	PRPF18	Body	opensea	Body-opensea			TRUE
cg05964640	0.100354	0.358034	4.04525	0.00104219	0.04538	-1.24677	0.307857	0.408211	0.100354	16	84390897	R	II		IGR	opensea	IGR-opensea			TRUE
cg21798802	0.105232	0.500591	4.04426	0.0010443	0.045412	-1.24881	0.447975	0.553207	0.105232	22	38057573	R	II	PDXP	Body	shelf	Body-shelf	chr22:38054403-38055450	TRUE	TRUE
cg26679912	0.106095	0.697829	4.04242	0.00104822	0.0454881	-1.25255	0.644782	0.750877	0.106095	7	37991986	F	II		IGR	opensea	IGR-opensea
cg25161170	0.166868	0.54084	4.04172	0.00104973	0.0455208	-1.25399	0.457406	0.624275	0.166868	2	39888273	R	II		IGR	opensea	IGR-opensea			TRUE
cg12906748	0.121443	0.296582	4.04161	0.00104996	0.045525	-1.25421	0.235861	0.357304	0.121443	11	8954576	R	I	C11orf16	TSS200	opensea	TSS200-opensea			TRUE
cg16576895	-0.135153	0.669518	-4.04081	0.00105168	0.0455646	-1.25586	0.737094	0.601942	-0.135153	18	43842240	R	II	C18orf25	Body	opensea	Body-opensea			TRUE
cg16377108	0.108366	0.577008	4.04042	0.0010525	0.0455801	-1.25664	0.522825	0.631191	0.108366	12	119557318	F	II	SRRM4	Body	opensea	Body-opensea			TRUE		rs11612089
cg04319611	0.130934	0.712477	4.03709	0.00105969	0.0457673	-1.26345	0.64701	0.777945	0.130934	3	171784422	R	II	FNDC3B	5'UTR	opensea	5'UTR-opensea			TRUE
cg11875744	-0.118141	0.429015	-4.03706	0.00105974	0.0457673	-1.2635	0.488085	0.369944	-0.118141	4	147177156	F	II	SLC10A7	3'UTR	opensea	3'UTR-opensea			TRUE
cg12271487	0.130338	0.419052	4.03648	0.00106099	0.0457969	-1.26468	0.353883	0.484221	0.130338	6	109266451	R	II	ARMC2	Body	opensea	Body-opensea			TRUE
cg13594138	0.151141	0.515835	4.03462	0.00106503	0.0459058	-1.26849	0.440265	0.591405	0.151141	15	90326828	R	I		IGR	opensea	IGR-opensea			TRUE
cg20330521	0.109312	0.445855	4.03442	0.00106548	0.0459163	-1.26891	0.3912	0.500511	0.109312	8	121217010	F	II	COL14A1	Body	opensea	Body-opensea			TRUE
cg17563773	0.102791	0.135006	4.03383	0.00106676	0.0459423	-1.27011	0.0836102	0.186402	0.102791	11	120177486	R	II	POU2F3	Body	opensea	Body-opensea		TRUE	TRUE
cg02773698	0.10974	0.630913	4.03282	0.00106896	0.0459992	-1.27217	0.576043	0.685782	0.10974	11	72682460	R	II	FCHSD2	Body	opensea	Body-opensea			TRUE
cg18060431	0.161256	0.539969	4.03022	0.00107463	0.0461294	-1.27747	0.459341	0.620597	0.161256	11	115378212	R	II		IGR	shelf	IGR-shelf	chr11:115373574-115375881
cg25772365	0.115059	0.587664	4.03	0.00107511	0.0461294	-1.27792	0.530135	0.645194	0.115059	6	140762224	F	II		IGR	opensea	IGR-opensea			TRUE		rs9495704
cg15037004	0.114429	0.15029	4.02927	0.00107673	0.0461686	-1.27943	0.0930759	0.207505	0.114429	5	71803938	R	II	ZNF366	TSS1500	opensea	TSS1500-opensea
cg04228042	-0.100661	0.435271	-4.02755	0.0010805	0.0462782	-1.28293	0.485601	0.38494	-0.100661	12	14996527	F	II	ART4	TSS200	opensea	TSS200-opensea
cg25193782	0.109477	0.666198	4.02706	0.00108159	0.0462843	-1.28393	0.61146	0.720936	0.109477	17	47976494	R	II		IGR	shelf	IGR-shelf	chr17:47979465-47979740	TRUE	TRUE
cg12229841	-0.119323	0.236926	-4.02699	0.00108175	0.0462843	-1.28408	0.296588	0.177265	-0.119323	19	4338852	R	II	STAP2	TSS200	opensea	TSS200-opensea		TRUE
cg20943039	0.114314	0.356666	4.02523	0.00108564	0.0463526	-1.28768	0.299509	0.413823	0.114314	15	65186445	R	I		IGR	opensea	IGR-opensea		TRUE	TRUE
cg23279756	0.121022	0.386759	4.0252	0.00108569	0.0463526	-1.28772	0.326248	0.44727	0.121022	6	109159348	R	I		IGR	opensea	IGR-opensea			TRUE
cg17271504	0.110192	0.737583	4.02508	0.00108597	0.0463526	-1.28798	0.682486	0.792679	0.110192	1	201864501	F	II		IGR	opensea	IGR-opensea			TRUE
cg02391922	0.123615	0.544682	4.0247	0.00108681	0.0463526	-1.28875	0.482875	0.60649	0.123615	15	60837277	R	II	RORA	Body	opensea	Body-opensea			TRUE
cg08651590	0.134457	0.485432	4.02359	0.00108927	0.0464179	-1.29101	0.418204	0.552661	0.134457	2	65543410	F	II	SPRED2	Body	shelf	Body-shelf	chr2:65540761-65541311		TRUE
cg16705097	0.109757	0.564713	4.0234	0.00108969	0.0464179	-1.29141	0.509834	0.619592	0.109757	13	30461939	F	II		IGR	opensea	IGR-opensea			TRUE
cg07058998	0.139164	0.333587	4.02336	0.00108979	0.0464179	-1.2915	0.264006	0.403169	0.139164	18	52625365	F	II	CCDC68	TSS200	shore	TSS200-shore	chr18:52626517-52626849
cg00640314	0.217425	0.631305	4.02274	0.00109117	0.0464581	-1.29277	0.522593	0.740018	0.217425	8	67835853	R	II	SNORD87	TSS1500	shore	TSS1500-shore	chr8:67837480-67837954
cg06083412	-0.148301	0.317282	-4.02191	0.00109302	0.046483	-1.29445	0.391432	0.243132	-0.148301	8	71228213	F	II	NCOA2	5'UTR	opensea	5'UTR-opensea			TRUE
cg10243567	0.157157	0.497771	4.02098	0.0010951	0.0465199	-1.29636	0.419193	0.57635	0.157157	1	200332938	R	II		IGR	opensea	IGR-opensea			TRUE
cg24315586	0.113195	0.597678	4.0195	0.00109842	0.0466164	-1.29939	0.54108	0.654275	0.113195	19	14188113	R	II		IGR	shore	IGR-shore	chr19:14185903-14186131
cg25862117	0.111843	0.70273	4.01943	0.00109857	0.0466164	-1.29953	0.646808	0.758651	0.111843	6	131504781	F	II	AKAP7	Body	opensea	Body-opensea			TRUE
cg07757007	-0.128021	0.580322	-4.0176	0.00110268	0.0466808	-1.30327	0.644333	0.516312	-0.128021	2	138734074	F	II	HNMT	Body	opensea	Body-opensea			TRUE		rs74590302
cg15411840	-0.119051	0.540248	-4.01722	0.00110353	0.04669	-1.30404	0.599774	0.480723	-0.119051	6	109615455	R	II	CCDC162	TSS200	shelf	TSS200-shelf	chr6:109611449-109612230
cg09535960	0.136021	0.502859	4.01669	0.00110472	0.0467022	-1.30511	0.434848	0.570869	0.136021	8	23193704	F	II	LOXL2	Body	opensea	Body-opensea		TRUE	TRUE
cg01071493	0.105753	0.610552	4.01645	0.00110528	0.046716	-1.30562	0.557675	0.663428	0.105753	11	65363954	R	II	KCNK7	TSS1500	shelf	TSS1500-shelf	chr11:65366864-65367254	TRUE
cg19096849	0.139471	0.493733	4.01633	0.00110555	0.0467184	-1.30587	0.423997	0.563469	0.139471	7	80230544	F	II	CD36	TSS1500	opensea	TSS1500-opensea					rs60212250
cg01827999	0.108861	0.30446	4.01615	0.00110593	0.0467207	-1.30621	0.25003	0.358891	0.108861	17	17791914	R	II	TOM1L2	Body	opensea	Body-opensea			TRUE
cg12005412	0.112965	0.607875	4.01594	0.00110641	0.0467316	-1.30664	0.551392	0.664357	0.112965	2	204674074	R	II		IGR	opensea	IGR-opensea			TRUE			rs67550272
cg00660989	0.116908	0.352926	4.01589	0.00110652	0.0467316	-1.30675	0.294472	0.41138	0.116908	14	45432516	R	II	KLHL28	TSS1500	shore	TSS1500-shore	chr14:45431628-45432115
cg04899446	0.107059	0.692423	4.01555	0.00110729	0.0467385	-1.30745	0.638894	0.745953	0.107059	1	10739980	F	II	CASZ1	Body	opensea	Body-opensea		TRUE
cg04033732	0.104371	0.340485	4.01553	0.00110735	0.0467385	-1.3075	0.2883	0.392671	0.104371	16	67707096	F	II		IGR	opensea	IGR-opensea			TRUE
cg03946955	-0.127665	0.477034	-4.01459	0.00110947	0.0468005	-1.30941	0.540867	0.413201	-0.127665	1	156096301	R	II	LMNA	Body	opensea	Body-opensea		TRUE
cg15978017	0.127438	0.475588	4.01311	0.00111283	0.0468894	-1.31243	0.411869	0.539307	0.127438	13	29042758	F	II	FLT1	Body	opensea	Body-opensea			TRUE		rs78248161
cg04918770	-0.127285	0.42854	-4.01088	0.00111791	0.0470126	-1.31699	0.492182	0.364898	-0.127285	6	18053826	F	II		IGR	opensea	IGR-opensea			TRUE
cg11652982	-0.135943	0.426883	-4.01017	0.00111952	0.0470372	-1.31844	0.494855	0.358912	-0.135943	10	773101	R	I		IGR	shore	IGR-shore	chr10:772293-772508
cg14394171	-0.140801	0.525522	-4.00873	0.00112283	0.0471072	-1.32139	0.595923	0.455122	-0.140801	7	41148057	R	II		IGR	opensea	IGR-opensea			TRUE
cg04859117	-0.109991	0.666045	-4.00812	0.00112421	0.0471239	-1.32262	0.72104	0.61105	-0.109991	11	2011341	F	I	LOC100133545	TSS200	shore	TSS200-shore	chr11:2013333-2013617
cg21592003	-0.121142	0.211719	-4.00793	0.00112467	0.0471288	-1.32303	0.27229	0.151148	-0.121142	15	74687517	R	II		IGR	opensea	IGR-opensea		TRUE	TRUE
cg06489037	-0.109562	0.0896834	-4.00782	0.00112492	0.0471348	-1.32325	0.144464	0.0349025	-0.109562	3	107706245	F	II		IGR	opensea	IGR-opensea			TRUE		rs11280444
cg13567405	-0.177121	0.306952	-4.00734	0.00112602	0.0471579	-1.32423	0.395512	0.218392	-0.177121	11	94372017	F	II		IGR	opensea	IGR-opensea			TRUE
cg14003416	-0.152469	0.647727	-4.00723	0.00112626	0.0471579	-1.32444	0.723962	0.571492	-0.152469	2	12557155	R	II		IGR	opensea	IGR-opensea			TRUE
cg27478224	-0.136406	0.256295	-4.0055	0.00113024	0.0472643	-1.32798	0.324498	0.188092	-0.136406	10	91061115	R	II	IFIT2	TSS1500	opensea	TSS1500-opensea
cg24214471	0.132746	0.390103	4.00331	0.00113531	0.0473952	-1.33246	0.32373	0.456476	0.132746	20	36154292	R	II	BLCAP	5'UTR	shore	5'UTR-shore	chr20:36156022-36156669		TRUE
cg01513157	-0.176165	0.310079	-4.00326	0.00113544	0.0473952	-1.33257	0.398162	0.221996	-0.176165	16	82031434	F	II	SDR42E1	3'UTR	opensea	3'UTR-opensea			TRUE		rs11443
cg02613034	0.108012	0.750636	4.0032	0.00113558	0.0473952	-1.33269	0.696629	0.804642	0.108012	3	43775598	F	II		IGR	opensea	IGR-opensea		TRUE	TRUE		rs73089215	rs76498818
cg03832784	0.17907	0.306345	4.00271	0.00113671	0.0474023	-1.33369	0.21681	0.39588	0.17907	5	139483760	R	II		IGR	shelf	IGR-shelf	chr5:139486931-139487672
cg12537728	0.109781	0.32247	4.00254	0.0011371	0.0474077	-1.33403	0.267579	0.377361	0.109781	11	13309596	F	I	ARNTL	5'UTR	opensea	5'UTR-opensea			TRUE
cg26025203	0.102802	0.733742	4.00253	0.00113713	0.0474077	-1.33406	0.682341	0.785143	0.102802	X	124451563	R	II		IGR	shelf	IGR-shelf	chrX:124453902-124454150
cg05849676	0.119346	0.673089	4.00246	0.00113729	0.0474077	-1.3342	0.613416	0.732762	0.119346	12	10171151	F	II	CLEC12B	3'UTR	opensea	3'UTR-opensea			TRUE
cg14780837	0.100189	0.257498	4.0011	0.00114045	0.0474888	-1.33698	0.207404	0.307593	0.100189	22	39760267	R	II	SYNGR1	Body	opensea	Body-opensea			TRUE
cg21627181	0.104673	0.520864	4.00004	0.00114292	0.0475576	-1.33914	0.468527	0.5732	0.104673	6	25754190	F	II	SLC17A4	TSS1500	opensea	TSS1500-opensea
cg09429735	-0.176869	0.413371	-3.99952	0.00114415	0.0475991	-1.34021	0.501806	0.324936	-0.176869	3	71752026	F	II	EIF4E3	Body	opensea	Body-opensea			TRUE
cg23225050	0.110324	0.703647	3.99829	0.00114702	0.0476531	-1.34272	0.648485	0.758809	0.110324	22	23602765	R	II	BCR	Body	shelf	Body-shelf	chr22:23605241-23605566		TRUE
cg14415629	0.122189	0.463824	3.99793	0.00114787	0.047663	-1.34346	0.402729	0.524918	0.122189	11	33033607	F	II		IGR	shelf	IGR-shelf	chr11:33037206-33037917	TRUE
cg14206882	0.137714	0.673823	3.99701	0.00115002	0.047703	-1.34534	0.604966	0.74268	0.137714	1	209602955	R	II	LOC642587	Body	opensea	Body-opensea			TRUE
cg15156712	-0.155178	0.745747	-3.99606	0.00115226	0.0477613	-1.34728	0.823336	0.668158	-0.155178	1	54362886	R	II	DIO1	Body	opensea	Body-opensea			TRUE
cg06112560	0.122226	0.671204	3.99575	0.00115298	0.0477798	-1.34791	0.610091	0.732317	0.122226	16	23691827	F	II	PLK1	Body	shore	Body-shore	chr16:23689891-23690671		TRUE
cg13316543	-0.137276	0.271007	-3.99463	0.00115561	0.0478397	-1.35019	0.339645	0.202369	-0.137276	8	1921165	F	II	KBTBD11	TSS1500	shore	TSS1500-shore	chr8:1921559-1922872	TRUE
cg11023668	-0.111183	0.220021	-3.99447	0.00115599	0.0478459	-1.35052	0.275613	0.16443	-0.111183	2	25095040	F	II	ADCY3	Body	opensea	Body-opensea		TRUE	TRUE
cg12629515	0.106585	0.159896	3.99382	0.00115753	0.0478907	-1.35185	0.106603	0.213188	0.106585	6	27859811	R	II	HIST1H3J	TSS1500	shore	TSS1500-shore	chr6:27860653-27860918
cg10208583	0.149475	0.50199	3.99368	0.00115786	0.0478939	-1.35214	0.427253	0.576728	0.149475	5	146232064	F	II	PPP2R2B	Body	opensea	Body-opensea			TRUE
cg08578734	0.117724	0.580366	3.99355	0.00115818	0.0478939	-1.35241	0.521503	0.639228	0.117724	5	152870490	R	II	GRIA1	1stExon	opensea	1stExon-opensea			TRUE
cg06126593	0.101325	0.523346	3.99163	0.00116272	0.0479759	-1.35633	0.472684	0.574008	0.101325	16	20910405	R	II	LYRM1	TSS1500	shore	TSS1500-shore	chr16:20911566-20912616
[truncated: 1,525 more rows]
