# Supplementary material for: Comprehensive analysis of DNA methylation patterns in recurrent miscarriage: imprinted/non-imprinted genes and their regulation across sperm and fetal-maternal tissues
Source: PeerJ. 2025 Oct 7;13:e20125. doi: 10.7717/peerj.20125 (PMC12513379; doi:10.7717/peerj.20125)
Supplement: Supplemental Information 5 [file peerj-13-20125-s005.xlsx]

## Sheet: 补充TableS3.DMP.decidua
Table S4. The differentially methylated probes (DMPs) identified in decidua between recurrent miscarriage (RM) and artificial accidental termination of pregnancy (AA) groups.
probe	logFC	AveExpr	t	P.Value	adj.P.Val	B	RM_AVG	AA_AVG	deltaBeta	CHR	MAPINFO	Strand	Type	gene	feature	cgi	feat.cgi	UCSC_CpG_Islands_Name	DHS	Enhancer	Phantom	Probe_SNPs	Probe_SNPs_10
cg15931047	-0.125246	0.0559102	-9.73213	6.15956e-08	0.0129586	8.6298	0.0167708	0.142017	0.125246	5	61700048	R	II	DIMT1L	TSS1500	shore	TSS1500-shore	chr5:61699350-61699877
cg25438517	0.208206	0.82111	8.92231	1.9223e-07	0.0269613	7.48331	0.886174	0.677968	-0.208206	5	77146796	F	II		IGR	shore	IGR-shore	chr5:77146998-77147785	TRUE
cg14981340	0.128216	0.721097	7.05589	3.55594e-06	0.0971705	4.5247	0.761164	0.632949	-0.128216	11	125815776	R	II		IGR	opensea	IGR-opensea
cg04787775	0.139383	0.771595	6.98123	4.03359e-06	0.0971705	4.39653	0.815152	0.675769	-0.139383	15	70690061	R	II		IGR	opensea	IGR-opensea			TRUE
cg19591080	-0.127354	0.164435	-6.82246	5.28662e-06	0.0971705	4.12137	0.124637	0.251991	0.127354	X	39868677	R	II		IGR	island	IGR-island	chrX:39864525-39869106	TRUE
cg08436104	0.111331	0.513124	6.7914	5.57618e-06	0.0971705	4.06713	0.547915	0.436584	-0.111331	5	38168076	R	I		IGR	opensea	IGR-opensea			TRUE			rs79903217
cg22116670	-0.20843	0.170373	-6.72073	6.29857e-06	0.0971705	3.9432	0.105238	0.313668	0.20843	5	151066730	F	II	SPARC	TSS1500	opensea	TSS1500-opensea		TRUE
cg14633398	0.106925	0.284348	6.6798	6.76111e-06	0.0971705	3.87111	0.317762	0.210838	-0.106925	9	19789383	R	II		IGR	shore	IGR-shore	chr9:19788215-19789288
cg01822827	0.102891	0.695111	6.66573	6.92813e-06	0.0971705	3.84628	0.727264	0.624374	-0.102891	8	99180671	F	II		IGR	opensea	IGR-opensea			TRUE		rs9693153
cg04072009	-0.102172	0.522643	-6.6351	7.30705e-06	0.0991791	3.79211	0.490715	0.592886	0.102172	X	71351668	R	I	NHSL2	Body	island	Body-island	chrX:71350941-71352137	TRUE
cg21773633	0.107712	0.644914	6.532	8.74943e-06	0.101885	3.60883	0.678574	0.570862	-0.107712	6	112375324	F	II	WISP3	TSS200	opensea	TSS200-opensea
cg09197895	-0.134791	0.135965	-6.50378	9.194e-06	0.101885	3.55841	0.0938429	0.228634	0.134791	14	105512268	F	I		IGR	island	IGR-island	chr14:105512055-105512307
cg15585294	0.107273	0.341935	6.44028	1.02829e-05	0.101885	3.44454	0.375458	0.268185	-0.107273	11	22687641	R	II	GAS2	TSS1500	shore	TSS1500-shore	chr11:22688285-22688617
cg09665351	-0.207775	0.205357	-6.43806	1.03232e-05	0.101885	3.44055	0.140427	0.348202	0.207775	X	9755283	F	II	SHROOM2	Body	shore	Body-shore	chrX:9753566-9755101	TRUE
cg27422580	0.113059	0.749362	6.40752	1.08965e-05	0.101885	3.38557	0.784692	0.671634	-0.113059	X	75373489	F	II		IGR	shelf	IGR-shelf	chrX:75369195-75369865
cg03926906	0.152608	0.749254	6.34649	1.21437e-05	0.102571	3.27532	0.796944	0.644336	-0.152608	16	88164581	R	I		IGR	shore	IGR-shore	chr16:88165560-88166034
cg14167415	0.244194	0.703921	6.27896	1.3699e-05	0.102571	3.15272	0.780231	0.536037	-0.244194	5	77146999	R	II		IGR	island	IGR-island	chr5:77146998-77147785
cg21380015	-0.161251	0.346467	-6.25977	1.41779e-05	0.102571	3.11777	0.296077	0.457327	0.161251	X	70474606	R	I	ZMYM3	TSS1500	shore	TSS1500-shore	chrX:70473812-70474287
cg18447419	0.135267	0.680128	6.17747	1.64383e-05	0.102571	2.96729	0.722398	0.587132	-0.135267	5	496299	R	I	SLC9A3	Body	shore	Body-shore	chr5:498111-498430	TRUE
cg01480180	0.164095	0.577199	6.10357	1.87885e-05	0.102571	2.83138	0.628479	0.464384	-0.164095	7	90896329	F	II	FZD1	1stExon	island	1stExon-island	chr7:90893567-90896683		TRUE
cg24536145	0.129935	0.763613	6.04306	2.09727e-05	0.102571	2.71953	0.804218	0.674283	-0.129935	4	186790675	F	II	SORBS2	5'UTR	opensea	5'UTR-opensea			TRUE
cg04470054	-0.104653	0.0618857	-6.02103	2.18323e-05	0.102571	2.67868	0.0291818	0.133834	0.104653	17	78830472	R	I	RPTOR	Body	shore	Body-shore	chr17:78831505-78831864	TRUE	TRUE
cg27024161	0.103016	0.818288	6.01146	2.22168e-05	0.102571	2.66093	0.85048	0.747464	-0.103016	5	17238232	R	II	BASP1	5'UTR	opensea	5'UTR-opensea			TRUE
cg17326597	0.118132	0.776555	5.97288	2.38408e-05	0.104308	2.58918	0.813471	0.695339	-0.118132	14	59810637	F	II	DAAM1	Body	opensea	Body-opensea			TRUE
cg14228812	0.115137	0.703087	5.9379	2.54203e-05	0.104308	2.52396	0.739067	0.623931	-0.115137	3	73630106	R	II	PDZRN3	Body	opensea	Body-opensea			TRUE
cg22217793	0.136564	0.858363	5.93547	2.55337e-05	0.104308	2.51943	0.901039	0.764475	-0.136564	18	76683160	F	II		IGR	shelf	IGR-shelf	chr18:76685187-76685397				rs73971156
cg14209781	0.105241	0.697279	5.92287	2.61317e-05	0.105724	2.4959	0.730167	0.624926	-0.105241	4	147932916	R	II		IGR	opensea	IGR-opensea			TRUE
cg22628873	0.148057	0.684005	5.85734	2.94854e-05	0.105904	2.37315	0.730273	0.582216	-0.148057	17	4464400	R	II	GGT6	TSS1500	opensea	TSS1500-opensea
cg08727193	-0.20835	0.157399	-5.85619	2.95482e-05	0.105904	2.37098	0.09229	0.30064	0.20835	14	105512306	F	II		IGR	island	IGR-island	chr14:105512055-105512307				rs12892214
cg26239297	0.110438	0.60961	5.84438	3.02001e-05	0.105904	2.3488	0.644122	0.533683	-0.110438	14	51347240	F	II	ABHD12B	Body	opensea	Body-opensea			TRUE
cg24936781	0.150772	0.678721	5.80938	3.22214e-05	0.109229	2.28295	0.725837	0.575065	-0.150772	4	143191281	R	II	INPP4B	Body	opensea	Body-opensea			TRUE
cg11493923	0.110072	0.750806	5.75845	3.54176e-05	0.109577	2.18682	0.785204	0.675132	-0.110072	6	22448632	F	II		IGR	opensea	IGR-opensea			TRUE
cg22259097	0.126059	0.799211	5.74597	3.62501e-05	0.110539	2.16322	0.838604	0.712545	-0.126059	4	170897176	F	II		IGR	opensea	IGR-opensea			TRUE
cg14444126	0.123983	0.7	5.71081	3.8706e-05	0.110539	2.0966	0.738744	0.614761	-0.123983	9	91321689	F	II		IGR	opensea	IGR-opensea
cg11862959	-0.115952	0.0464595	-5.70927	3.88174e-05	0.110539	2.09368	0.0102245	0.126176	0.115952	8	74205882	F	II	RDH10	TSS1500	shore	TSS1500-shore	chr8:74206223-74208179				rs16938607
cg19722671	0.117733	0.760097	5.70921	3.88218e-05	0.110539	2.09357	0.796889	0.679156	-0.117733	8	1404197	F	II		IGR	shore	IGR-shore	chr8:1404884-1405094
cg08432013	0.127876	0.588104	5.68018	4.09858e-05	0.110889	2.03845	0.628065	0.500189	-0.127876	11	83393570	F	II	DLG2	Body	opensea	Body-opensea			TRUE
cg26413900	0.127207	0.525704	5.62419	4.55218e-05	0.113337	1.93182	0.565456	0.438249	-0.127207	17	43985654	R	II	MAPT	5'UTR	opensea	5'UTR-opensea			TRUE
cg00697672	0.12232	0.413491	5.61362	4.64357e-05	0.113582	1.91163	0.451716	0.329396	-0.12232	16	89151343	R	I		IGR	opensea	IGR-opensea
cg09892104	0.145616	0.654762	5.60436	4.7251e-05	0.113609	1.89395	0.700267	0.554651	-0.145616	10	2815318	R	I		IGR	island	IGR-island	chr10:2815003-2815469
cg17034331	0.175741	0.793074	5.55327	5.20261e-05	0.11644	1.79618	0.847993	0.672252	-0.175741	5	77146318	F	II		IGR	shore	IGR-shore	chr5:77146998-77147785				rs13165722
cg10005270	0.117202	0.538549	5.54103	5.32428e-05	0.116642	1.7727	0.575174	0.457973	-0.117202	10	128210036	F	II	C10orf90	TSS200	opensea	TSS200-opensea
cg04906242	0.101479	0.380464	5.51328	5.61118e-05	0.116881	1.71941	0.412176	0.310697	-0.101479	16	75150880	R	I	LDHD	TSS1500	shelf	TSS1500-shelf	chr16:75148398-75148864	TRUE
cg04830357	-0.16783	0.1428	-5.47226	6.06492e-05	0.118935	1.64047	0.0903527	0.258183	0.16783	5	140718339	F	II	PCDHGA1	Body	shore	Body-shore	chr5:140719129-140719343	TRUE			rs4912748
cg04070188	0.129318	0.642074	5.44436	6.39519e-05	0.119065	1.58665	0.682486	0.553168	-0.129318	7	89809444	F	II		IGR	opensea	IGR-opensea			TRUE
cg13932450	0.122944	0.804133	5.38268	7.19312e-05	0.120413	1.46732	0.842553	0.719609	-0.122944	6	43879598	F	II	LOC100132354	Body	opensea	Body-opensea			TRUE
cg23035923	0.110925	0.702232	5.37314	7.32542e-05	0.120413	1.44883	0.736896	0.625971	-0.110925	22	25615557	F	II	CRYBB2	TSS200	opensea	TSS200-opensea
cg24317190	0.114848	0.83503	5.36739	7.40639e-05	0.120413	1.43767	0.87092	0.756072	-0.114848	7	54900936	R	I		IGR	island	IGR-island	chr7:54900736-54901261
cg18705279	0.102063	0.20136	5.36201	7.48299e-05	0.120413	1.42724	0.233255	0.131192	-0.102063	16	67197129	R	II	HSF4	TSS200	island	TSS200-island	chr16:67196792-67199988
cg14610066	0.109136	0.835244	5.32723	7.99841e-05	0.120413	1.35966	0.869349	0.760213	-0.109136	9	71936691	F	II		IGR	shelf	IGR-shelf	chr9:71939501-71940679
cg18634211	-0.230109	0.226805	-5.32012	8.10825e-05	0.120413	1.34583	0.154896	0.385005	0.230109	1	26737262	R	II	LIN28	TSS200	island	TSS200-island	chr1:26737246-26738148					rs76068276
cg19030682	0.143008	0.606198	5.31636	8.16686e-05	0.120413	1.33852	0.650887	0.50788	-0.143008	17	79218991	F	I	SLC38A10	3'UTR	opensea	3'UTR-opensea			TRUE			rs79388860
cg11076814	0.123504	0.79806	5.31376	8.20775e-05	0.120413	1.33345	0.836655	0.713151	-0.123504	4	11225303	R	II		IGR	opensea	IGR-opensea			TRUE
cg13491731	0.102058	0.501036	5.31371	8.20857e-05	0.120413	1.33335	0.532929	0.430871	-0.102058	14	76594783	F	II		IGR	shelf	IGR-shelf	chr14:76597648-76597911
cg10352418	0.103363	0.698185	5.31341	8.21328e-05	0.120413	1.33277	0.730486	0.627123	-0.103363	16	66876938	R	II	CA7	TSS1500	shore	TSS1500-shore	chr16:66878172-66879072
cg23022778	0.124443	0.731863	5.302	8.39515e-05	0.121182	1.31056	0.770751	0.646309	-0.124443	1	236246704	R	II		IGR	opensea	IGR-opensea			TRUE
cg09080087	0.136832	0.781078	5.29381	8.52824e-05	0.121186	1.2946	0.823838	0.687006	-0.136832	6	168240272	F	II	MLLT4	Body	opensea	Body-opensea			TRUE		rs9364365
cg15320277	0.14046	0.668467	5.27371	8.86433e-05	0.121186	1.25541	0.712361	0.571901	-0.14046	14	79316418	R	II	NRXN3	Body	opensea	Body-opensea			TRUE
cg12613382	0.113801	0.73692	5.27189	8.89546e-05	0.121186	1.25185	0.772483	0.658681	-0.113801	12	132663883	R	II		IGR	shore	IGR-shore	chr12:132663322-132663748
cg04939302	0.139816	0.726722	5.26797	8.96283e-05	0.121186	1.2442	0.770414	0.630599	-0.139816	2	30213458	F	II		IGR	opensea	IGR-opensea			TRUE
cg11062466	-0.28929	0.417288	-5.25958	9.10882e-05	0.12245	1.22782	0.326885	0.616175	0.28929	8	58055876	R	I		IGR	shore	IGR-shore	chr8:58055960-58056244
cg19559537	-0.158371	0.12925	-5.23838	9.4887e-05	0.123446	1.18639	0.0797585	0.23813	0.158371	17	36204489	F	I	LOC284100	Body	opensea	Body-opensea		TRUE
cg23325197	0.167672	0.782155	5.2247	9.74241e-05	0.123813	1.15964	0.834553	0.66688	-0.167672	12	58064666	F	II		IGR	shelf	IGR-shelf	chr12:58068473-58068774
cg10639981	-0.125548	0.205119	-5.20019	0.000102149	0.123813	1.11163	0.165885	0.291433	0.125548	19	50762343	R	II	MYH14	Body	island	Body-island	chr19:50762342-50762552	TRUE
cg21061859	0.103417	0.534286	5.1936	0.000103459	0.123813	1.09871	0.566604	0.463187	-0.103417	14	79342116	F	II	NRXN3	Body	opensea	Body-opensea			TRUE
cg25258879	-0.109521	0.381839	-5.19014	0.000104153	0.123813	1.09194	0.347613	0.457134	0.109521	X	49022996	R	I	MAGIX	3'UTR	island	3'UTR-island	chrX:49022407-49023072	TRUE	TRUE	high-CpG:48909904-48909951
cg11935738	-0.126306	0.408584	-5.17922	0.000106377	0.123813	1.07052	0.369114	0.49542	0.126306	6	29520752	F	II		IGR	shore	IGR-shore	chr6:29521110-29521833	TRUE			rs446145
cg06826155	0.112868	0.781705	5.15635	0.000111198	0.123813	1.02561	0.816976	0.704108	-0.112868	13	107180025	F	II	EFNB2	Body	opensea	Body-opensea			TRUE
cg16369987	0.101351	0.621059	5.15366	0.00011178	0.123813	1.02032	0.652731	0.55138	-0.101351	7	127804217	R	II		IGR	shelf	IGR-shelf	chr7:127806677-127808849	TRUE
cg15221831	0.132158	0.763395	5.1519	0.000112161	0.123813	1.01687	0.804695	0.672536	-0.132158	19	42408464	F	I	ARHGEF1	Body	island	Body-island	chr19:42408315-42408535	TRUE
cg09565002	0.107971	0.546354	5.1506	0.000112445	0.123813	1.01431	0.580095	0.472124	-0.107971	4	15939889	F	II	FGFBP1	1stExon	opensea	1stExon-opensea			TRUE		rs2245964
cg13372766	-0.13583	0.234297	-5.15024	0.000112524	0.123813	1.0136	0.19185	0.32768	0.13583	1	228464049	F	I	OBSCN	Body	island	Body-island	chr1:228463249-228464488		TRUE		rs11590548
cg01988136	-0.119735	0.612235	-5.13718	0.000115412	0.123813	0.987917	0.574818	0.694552	0.119735	6	166667897	F	II		IGR	shore	IGR-shore	chr6:166666837-166667541
cg16029659	0.130593	0.611159	5.13558	0.00011577	0.123813	0.98478	0.651969	0.521376	-0.130593	21	46241005	F	II		IGR	shelf	IGR-shelf	chr21:46236726-46238958
cg04153082	0.105967	0.837623	5.13045	0.000116929	0.123813	0.974682	0.870737	0.76477	-0.105967	8	48325740	F	II	KIAA0146	Body	opensea	Body-opensea			TRUE
cg01275685	0.106619	0.767655	5.12746	0.000117609	0.123813	0.968811	0.800973	0.694354	-0.106619	7	34179230	F	I	BMPER	Body	opensea	Body-opensea			TRUE		rs11773230
cg01808708	0.117648	0.820554	5.10504	0.000122848	0.125783	0.924655	0.857319	0.73967	-0.117648	1	183484105	F	II	SMG7	5'UTR	opensea	5'UTR-opensea			TRUE
cg12444736	0.112952	0.579318	5.0978	0.000124592	0.125783	0.910382	0.614616	0.501664	-0.112952	13	112630712	R	I		IGR	island	IGR-island	chr13:112630568-112630796
cg21193744	0.155861	0.715778	5.09446	0.000125403	0.125783	0.903808	0.764485	0.608624	-0.155861	8	6405105	R	II	ANGPT2	Body	opensea	Body-opensea		TRUE	TRUE
cg07917546	0.123241	0.661931	5.08632	0.000127408	0.125783	0.887744	0.700444	0.577203	-0.123241	16	86496223	F	I		IGR	opensea	IGR-opensea			TRUE
cg22692507	0.11441	0.727803	5.07816	0.000129448	0.125783	0.871654	0.763556	0.649146	-0.11441	5	81446503	R	II	ATG10	Body	opensea	Body-opensea			TRUE
cg20436458	0.110711	0.603507	5.07774	0.000129556	0.125783	0.87081	0.638104	0.527394	-0.110711	2	68149422	F	II		IGR	opensea	IGR-opensea			TRUE		rs6704741
cg05334656	0.130961	0.714489	5.0602	0.00013406	0.125783	0.836197	0.755415	0.624454	-0.130961	4	4866047	R	II		IGR	shore	IGR-shore	chr4:4866438-4866813
cg21208682	-0.148797	0.356632	-5.05332	0.000135873	0.125783	0.822597	0.310133	0.45893	0.148797	8	141608434	F	II	EIF2C2	Body	opensea	Body-opensea		TRUE	TRUE		rs75582771
cg26436731	0.113217	0.461166	5.05318	0.00013591	0.125783	0.822319	0.496547	0.383329	-0.113217	1	244395115	R	II		IGR	opensea	IGR-opensea			TRUE
cg07267294	0.122038	0.548196	5.03932	0.000139638	0.125783	0.794924	0.586333	0.464295	-0.122038	5	58893722	R	II	PDE4D	Body	opensea	Body-opensea			TRUE
cg15673955	0.182578	0.657546	5.03667	0.000140362	0.125783	0.789684	0.714602	0.532024	-0.182578	2	173787028	R	II	RAPGEF4	Body	opensea	Body-opensea			TRUE			rs57766910
cg03290752	-0.108078	0.140544	-5.03248	0.000141517	0.125783	0.781391	0.10677	0.214847	0.108078	3	176915082	R	I	TBL1XR1	TSS200	shore	TSS200-shore	chr3:176915511-176915854			high-CpG:178397621-178398086
cg18433009	0.123036	0.620561	5.0298	0.00014226	0.125783	0.776085	0.659009	0.535973	-0.123036	10	72013286	F	II		IGR	shore	IGR-shore	chr10:72014777-72015696		TRUE
cg08104146	0.179626	0.462971	5.02879	0.000142542	0.125783	0.774085	0.519105	0.339478	-0.179626	15	93208920	R	II		IGR	opensea	IGR-opensea			TRUE
cg05228186	0.100911	0.730884	5.02794	0.000142777	0.125783	0.772414	0.762418	0.661508	-0.100911	11	83393344	R	II	DLG2	1stExon	opensea	1stExon-opensea			TRUE
cg16107470	0.106045	0.663325	5.02277	0.000144228	0.125783	0.762174	0.696464	0.590419	-0.106045	5	12865512	F	II		IGR	opensea	IGR-opensea			TRUE
cg03321349	0.102014	0.711933	5.02227	0.000144368	0.125783	0.761194	0.743813	0.641798	-0.102014	2	125239714	R	II	CNTNAP5	Body	opensea	Body-opensea			TRUE
cg19200589	-0.179949	0.171982	-5.02139	0.000144617	0.125783	0.759451	0.115747	0.295697	0.179949	21	36041605	F	I	CLIC6	TSS200	island	TSS200-island	chr21:36041305-36043224				rs73357389
cg00625443	0.11979	0.754819	5.02074	0.000144802	0.125783	0.758153	0.792253	0.672463	-0.11979	15	80997087	F	II	FAM108C1	Body	opensea	Body-opensea			TRUE		rs34293143
cg00929322	0.160462	0.703166	5.02009	0.000144985	0.125783	0.756875	0.75331	0.592848	-0.160462	7	122900147	R	II		IGR	opensea	IGR-opensea			TRUE
cg06789840	0.147725	0.654409	5.01751	0.00014572	0.12616	0.751758	0.700573	0.552848	-0.147725	8	1242282	R	I		IGR	shelf	IGR-shelf	chr8:1245671-1246464		TRUE			rs10701811
cg00402547	0.131658	0.738044	5.00026	0.000150722	0.126353	0.717596	0.779188	0.64753	-0.131658	18	6835382	R	II	ARHGAP28	5'UTR	opensea	5'UTR-opensea			TRUE
cg15380511	0.154779	0.799115	4.99872	0.000151177	0.126353	0.714543	0.847484	0.692705	-0.154779	5	124835828	F	II		IGR	opensea	IGR-opensea			TRUE
cg00737916	0.108914	0.79298	4.99668	0.000151782	0.126353	0.710503	0.827015	0.718101	-0.108914	16	88164558	R	I		IGR	shore	IGR-shore	chr16:88165560-88166034
cg23543795	0.104503	0.677714	4.98801	0.000154381	0.126353	0.693316	0.710371	0.605868	-0.104503	7	107965081	R	II	NRCAM	5'UTR	opensea	5'UTR-opensea			TRUE
cg07107916	0.114493	0.760192	4.98681	0.000154744	0.126353	0.690939	0.795971	0.681478	-0.114493	1	212457424	F	II	PPP2R5A	TSS1500	shore	TSS1500-shore	chr1:212457967-212459694
cg04077417	0.14904	0.635779	4.97965	0.000156932	0.126353	0.676727	0.682354	0.533314	-0.14904	7	48676611	F	II	ABCA13	Body	opensea	Body-opensea			TRUE
cg12646800	0.107624	0.622402	4.97787	0.000157481	0.126353	0.673197	0.656035	0.548411	-0.107624	13	36456681	R	II	MIR548F5	Body	opensea	Body-opensea			TRUE
cg08162976	0.108764	0.551273	4.97109	0.000159588	0.126353	0.659747	0.585262	0.476498	-0.108764	2	67032496	F	II		IGR	opensea	IGR-opensea			TRUE
cg11286742	0.147949	0.748664	4.96913	0.000160204	0.126353	0.655849	0.794898	0.64695	-0.147949	3	149860152	R	II		IGR	opensea	IGR-opensea			TRUE
cg16692090	0.14791	0.734477	4.96226	0.000162377	0.126353	0.642216	0.780699	0.632789	-0.14791	4	25867290	R	II		IGR	shore	IGR-shore	chr4:25865063-25865376	TRUE
cg12019520	0.106906	0.763281	4.96132	0.000162675	0.126353	0.640358	0.796689	0.689783	-0.106906	4	8012176	F	I	ABLIM2	Body	opensea	Body-opensea			TRUE
cg27154651	-0.161297	0.598181	-4.95452	0.000164861	0.126353	0.626855	0.547775	0.709073	0.161297	6	30796209	F	II		IGR	opensea	IGR-opensea		TRUE	TRUE
cg20197861	-0.223817	0.228766	-4.95204	0.000165665	0.126353	0.621927	0.158823	0.38264	0.223817	X	39964229	R	I	BCOR	5'UTR	island	5'UTR-island	chrX:39953434-39969247	TRUE
cg10457852	0.121449	0.864028	4.94741	0.000167181	0.126353	0.612715	0.901981	0.780532	-0.121449	4	3776301	F	I		IGR	shelf	IGR-shelf	chr4:3773851-3774062
cg13321605	0.14908	0.676166	4.94545	0.000167826	0.126353	0.608814	0.722753	0.573673	-0.14908	5	91298666	F	II		IGR	opensea	IGR-opensea			TRUE
cg13202952	0.147685	0.614905	4.94208	0.000168941	0.126353	0.602119	0.661057	0.513372	-0.147685	8	21888398	R	II	NPM2	Body	opensea	Body-opensea		TRUE	TRUE
cg17060964	0.119303	0.503452	4.9358	0.000171038	0.126742	0.589639	0.540734	0.421431	-0.119303	11	55796572	F	II	OR5AS1	TSS1500	opensea	TSS1500-opensea					rs17600820
cg25913233	-0.146391	0.15941	-4.93231	0.000172216	0.126742	0.582692	0.113663	0.260054	0.146391	5	151066683	R	II	SPARC	TSS200	opensea	TSS200-opensea		TRUE
cg02788798	0.128607	0.840197	4.93207	0.000172297	0.126742	0.582216	0.880387	0.75178	-0.128607	3	103645700	R	II		IGR	opensea	IGR-opensea
cg08372947	-0.183532	0.19552	-4.92038	0.000176304	0.127336	0.55896	0.138166	0.321699	0.183532	17	42092370	R	I	TMEM101	TSS200	island	TSS200-island	chr17:42092143-42092432
cg09851620	0.101119	0.77967	4.90903	0.000180286	0.127979	0.536367	0.811269	0.71015	-0.101119	1	95403214	R	II		IGR	opensea	IGR-opensea			TRUE
cg12300731	0.105763	0.562039	4.90594	0.000181386	0.127979	0.530216	0.59509	0.489326	-0.105763	11	101207708	F	II		IGR	opensea	IGR-opensea			TRUE
cg05033333	-0.123818	0.139851	-4.90253	0.000182609	0.127979	0.523422	0.101158	0.224976	0.123818	16	3222180	F	I		IGR	shore	IGR-shore	chr16:3220438-3221356	TRUE	TRUE		rs72774429
cg06947913	-0.190516	0.185365	-4.89974	0.000183615	0.127979	0.517865	0.125829	0.316345	0.190516	12	50297793	R	I	FAIM2	TSS200	island	TSS200-island	chr12:50297580-50297988	TRUE	TRUE
cg04839706	0.110465	0.622684	4.89427	0.000185602	0.128446	0.506977	0.657204	0.546739	-0.110465	16	46920075	R	II	GPT2	Body	shore	Body-shore	chr16:46917849-46918957		TRUE
cg00334941	0.121181	0.741678	4.88628	0.000188548	0.128834	0.491052	0.779547	0.658367	-0.121181	3	146964907	R	II		IGR	opensea	IGR-opensea
cg13283952	-0.226107	0.386059	-4.87323	0.000193465	0.129485	0.465023	0.315401	0.541508	0.226107	2	121412005	F	I		IGR	island	IGR-island	chr2:121411983-121412315		TRUE		rs79522772
cg23146663	-0.198935	0.213535	-4.87269	0.000193671	0.129485	0.463947	0.151368	0.350303	0.198935	5	151066662	F	II	SPARC	TSS200	opensea	TSS200-opensea		TRUE
cg09741912	0.156929	0.695063	4.87212	0.000193887	0.129485	0.462819	0.744103	0.587174	-0.156929	11	114921894	R	II		IGR	opensea	IGR-opensea			TRUE
cg08994891	-0.119952	0.224737	-4.86548	0.000196442	0.129485	0.449578	0.187252	0.307204	0.119952	X	118987153	F	I	UPF3B	TSS200	island	TSS200-island	chrX:118986684-118987252				rs2496219
cg08655871	0.132228	0.733815	4.86451	0.00019682	0.129485	0.447636	0.775137	0.642908	-0.132228	4	79971408	R	II		IGR	opensea	IGR-opensea
cg19142043	0.10084	0.730184	4.86246	0.000197619	0.129485	0.443542	0.761697	0.660857	-0.10084	3	29724842	F	II	RBMS3	Body	opensea	Body-opensea			TRUE
cg24296761	0.148837	0.737933	4.86181	0.000197871	0.129485	0.44225	0.784445	0.635608	-0.148837	19	42408458	F	I	ARHGEF1	Body	island	Body-island	chr19:42408315-42408535	TRUE
cg19342102	0.112542	0.810909	4.85878	0.000199059	0.129485	0.436201	0.846079	0.733536	-0.112542	11	32265612	F	II		IGR	opensea	IGR-opensea			TRUE
cg02159489	-0.455537	0.240698	-4.85675	0.000199858	0.129485	0.432152	0.0983423	0.553879	0.455537	17	79459563	R	I		IGR	shelf	IGR-shelf	chr17:79454734-79455823
cg10964944	0.146408	0.729465	4.85003	0.00020253	0.129485	0.418726	0.775218	0.628809	-0.146408	8	142384901	R	I		IGR	opensea	IGR-opensea			TRUE			rs66520550
cg25232786	0.126382	0.778469	4.84556	0.000204324	0.129485	0.409811	0.817964	0.691581	-0.126382	3	161138842	F	II		IGR	opensea	IGR-opensea			TRUE
cg25334934	0.155465	0.595485	4.84285	0.000205423	0.129485	0.404386	0.644068	0.488602	-0.155465	2	121269348	R	I		IGR	opensea	IGR-opensea			TRUE
cg09115646	0.138405	0.800703	4.84056	0.000206355	0.129485	0.39981	0.843955	0.70555	-0.138405	10	2978687	R	I		IGR	opensea	IGR-opensea			TRUE
cg02601140	-0.142837	0.394318	-4.82403	0.00021321	0.13035	0.366779	0.349682	0.492519	0.142837	7	63250517	R	II		IGR	island	IGR-island	chr7:63250057-63250948					rs2929868
cg07530656	0.127297	0.465712	4.82351	0.00021343	0.13035	0.365736	0.505493	0.378196	-0.127297	16	5373567	R	II		IGR	opensea	IGR-opensea			TRUE
cg07597976	0.212311	0.723428	4.8214	0.00021432	0.13035	0.361531	0.789775	0.577464	-0.212311	16	28943019	F	II	CD19	TSS1500	opensea	TSS1500-opensea
cg00088844	-0.156327	0.242474	-4.81791	0.000215807	0.13035	0.354542	0.193622	0.349949	0.156327	12	52317349	R	II		IGR	opensea	IGR-opensea		TRUE	TRUE
cg00016934	-0.124659	0.148633	-4.81711	0.000216148	0.13035	0.352946	0.109678	0.234337	0.124659	X	40035961	F	I	BCOR	5'UTR	island	5'UTR-island	chrX:40034239-40036007	TRUE		high-CpG:39920835-39921017
cg08936516	0.149206	0.701487	4.81546	0.000216856	0.13035	0.349644	0.748113	0.598908	-0.149206	15	93210555	F	II		IGR	opensea	IGR-opensea			TRUE		rs11852714
cg14211780	0.11411	0.829585	4.81442	0.000217301	0.130432	0.34757	0.865244	0.751134	-0.11411	9	94577112	F	II	ROR2	Body	opensea	Body-opensea			TRUE
cg04955485	-0.135561	0.76711	-4.8041	0.000221789	0.131438	0.326915	0.724747	0.860307	0.135561	7	38344934	F	II		IGR	opensea	IGR-opensea					rs2249291
cg25571414	0.125159	0.754569	4.8019	0.000222756	0.131456	0.322516	0.793682	0.668522	-0.125159	4	25659572	F	II	SLC34A2	5'UTR	shelf	5'UTR-shelf	chr4:25657119-25657547		TRUE		rs12501856
cg00028014	0.155635	0.56034	4.79733	0.000224784	0.132097	0.313358	0.608976	0.453341	-0.155635	2	201601406	F	II		IGR	opensea	IGR-opensea			TRUE		rs13017660
cg26946092	0.148594	0.582581	4.79336	0.000226556	0.132215	0.305424	0.629017	0.480422	-0.148594	2	236139863	F	II		IGR	opensea	IGR-opensea			TRUE			rs11885137
cg27169846	0.1114	0.730381	4.78971	0.000228205	0.132508	0.298099	0.765193	0.653793	-0.1114	4	8012170	F	I	ABLIM2	Body	opensea	Body-opensea			TRUE
cg09915433	0.153666	0.48617	4.78043	0.000232441	0.132928	0.279517	0.534191	0.380524	-0.153666	19	53449742	R	II		IGR	shelf	IGR-shelf	chr19:53445344-53445933
cg24955895	-0.120689	0.141645	-4.78021	0.000232543	0.132928	0.279073	0.103929	0.224618	0.120689	1	25425923	R	I		IGR	opensea	IGR-opensea			TRUE
cg18640250	0.107159	0.765165	4.77273	0.000236017	0.132928	0.264094	0.798652	0.691493	-0.107159	5	1855934	F	I		IGR	shore	IGR-shore	chr5:1856773-1858444
cg21662240	0.112501	0.715476	4.77163	0.000236533	0.132928	0.261884	0.750633	0.638131	-0.112501	8	74945742	R	II		IGR	opensea	IGR-opensea			TRUE
cg09660878	0.199361	0.719648	4.76582	0.000239278	0.133705	0.250229	0.781948	0.582587	-0.199361	5	77142695	R	I		IGR	shore	IGR-shore	chr5:77140542-77140914		TRUE
cg08879559	-0.175901	0.171169	-4.76299	0.000240624	0.133933	0.244566	0.1162	0.292101	0.175901	5	151066486	F	II	SPARC	1stExon	opensea	1stExon-opensea		TRUE		low-CpG:151046661-151046731
cg06286521	0.104953	0.79764	4.76161	0.000241284	0.133933	0.241796	0.830438	0.725484	-0.104953	10	77909928	F	II	C10orf11	Body	opensea	Body-opensea			TRUE
cg19678610	0.101685	0.567063	4.75572	0.000244122	0.133933	0.229988	0.598839	0.497154	-0.101685	5	55529375	F	I	ANKRD55	TSS200	opensea	TSS200-opensea					rs76412333
cg01216497	0.126045	0.837895	4.75296	0.000245464	0.134214	0.224451	0.877284	0.751239	-0.126045	13	112074910	F	II		IGR	opensea	IGR-opensea					rs7995062
cg06103624	0.134779	0.839137	4.74771	0.000248037	0.134527	0.213917	0.881255	0.746476	-0.134779	15	66998926	R	I	SMAD6	Body	shelf	Body-shelf	chr15:66993543-66996571	TRUE	TRUE
cg25119077	0.11286	0.751035	4.74519	0.00024928	0.134527	0.208868	0.786303	0.673444	-0.11286	5	16881431	R	II	MYO10	Body	opensea	Body-opensea			TRUE
cg06511389	-0.192099	0.183116	-4.74275	0.000250492	0.13478	0.203973	0.123085	0.315184	0.192099	17	42092403	R	I	TMEM101	TSS200	island	TSS200-island	chr17:42092143-42092432
cg01551787	0.171418	0.810578	4.7256	0.000259184	0.136772	0.169525	0.864146	0.692728	-0.171418	3	72982378	F	II	GXYLT2	Body	opensea	Body-opensea			TRUE			rs79077366
cg14711108	0.101587	0.680676	4.71452	0.000264958	0.137106	0.147278	0.712422	0.610835	-0.101587	1	44813163	R	II	ERI3	Body	opensea	Body-opensea			TRUE
cg13777798	0.14386	0.687461	4.71421	0.000265122	0.137106	0.146656	0.732418	0.588558	-0.14386	10	112867846	R	II		IGR	opensea	IGR-opensea			TRUE
cg25894019	0.14439	0.842892	4.71334	0.000265583	0.137106	0.144899	0.888014	0.743624	-0.14439	10	115169101	R	I		IGR	opensea	IGR-opensea			TRUE
cg25490334	0.146496	0.642029	4.71275	0.000265893	0.137106	0.143724	0.687809	0.541313	-0.146496	6	152387590	F	II	ESR1	Body	opensea	Body-opensea			TRUE
cg07644125	0.133765	0.391672	4.71128	0.000266673	0.137152	0.140764	0.433473	0.299709	-0.133765	16	757149	R	I	FBXL16	TSS1500	shore	TSS1500-shore	chr16:755037-756696
cg18844900	0.134109	0.495085	4.70989	0.00026741	0.137152	0.137977	0.536994	0.402885	-0.134109	5	165184866	F	II		IGR	opensea	IGR-opensea			TRUE
cg17024482	0.119133	0.586245	4.70988	0.000267419	0.137152	0.137945	0.623474	0.504341	-0.119133	17	54230730	F	II	ANKFN1	TSS200	opensea	TSS200-opensea
cg02346342	0.122925	0.537858	4.70816	0.000268336	0.137152	0.134488	0.576272	0.453347	-0.122925	8	74332435	F	I		IGR	opensea	IGR-opensea		TRUE	TRUE
cg26413855	-0.135102	0.684022	-4.70718	0.000268859	0.137152	0.132523	0.641803	0.776905	0.135102	6	30796199	F	II		IGR	opensea	IGR-opensea		TRUE	TRUE			rs78402190
cg16565002	0.126408	0.651243	4.70606	0.000269458	0.137152	0.130276	0.690745	0.564337	-0.126408	3	29507737	F	II	RBMS3	Body	opensea	Body-opensea			TRUE
cg06197731	0.105852	0.707812	4.70465	0.000270219	0.137152	0.127428	0.740891	0.635039	-0.105852	1	56645455	R	II		IGR	opensea	IGR-opensea			TRUE
cg06586763	0.157096	0.485509	4.70215	0.000271563	0.137457	0.122421	0.534601	0.377506	-0.157096	16	29302087	F	II	RUNDC2C	TSS1500	opensea	TSS1500-opensea			TRUE		rs13333583
cg01171887	0.10131	0.51967	4.69704	0.000274343	0.137786	0.112142	0.55133	0.450019	-0.10131	14	104600633	F	II		IGR	shore	IGR-shore	chr14:104601959-104605672
cg03299824	0.186296	0.505458	4.688	0.00027933	0.138248	0.0939557	0.563675	0.37738	-0.186296	16	17647941	R	I		IGR	opensea	IGR-opensea			TRUE
cg16171771	0.129349	0.527706	4.68638	0.000280236	0.138248	0.0906865	0.568128	0.438779	-0.129349	3	34187750	F	II		IGR	opensea	IGR-opensea			TRUE
cg08243728	-0.150857	0.287809	-4.68206	0.000282656	0.138248	0.082009	0.240666	0.391523	0.150857	19	45905890	R	I	PPP1R13L	5'UTR	shelf	5'UTR-shelf	chr19:45908140-45908466	TRUE
cg09078527	0.117136	0.63366	4.67953	0.000284086	0.138248	0.0769153	0.670265	0.553129	-0.117136	5	55772865	R	II		IGR	shelf	IGR-shelf	chr5:55776604-55777233		TRUE
cg02744216	0.120745	0.452408	4.67125	0.000288816	0.138248	0.0602519	0.49014	0.369396	-0.120745	11	130507097	R	II		IGR	opensea	IGR-opensea		TRUE	TRUE
cg08617354	0.140878	0.71404	4.67025	0.000289395	0.138248	0.05823	0.758065	0.617187	-0.140878	10	68858663	F	II	CTNNA3	Body	opensea	Body-opensea			TRUE		rs75893681
cg09450367	-0.10958	0.11718	-4.66925	0.000289974	0.138293	0.056214	0.0829361	0.192516	0.10958	2	11294738	R	II	PQLC3	TSS1500	shore	TSS1500-shore	chr2:11295559-11296006
cg00554858	0.155133	0.857598	4.66154	0.000294467	0.138523	0.0406978	0.906077	0.750944	-0.155133	5	95991891	F	II		IGR	opensea	IGR-opensea			TRUE
cg19326217	0.104513	0.827655	4.66017	0.000295274	0.138523	0.0379375	0.860315	0.755802	-0.104513	4	144171750	F	II		IGR	opensea	IGR-opensea			TRUE		rs300935
cg15129663	0.143438	0.793973	4.65616	0.000297645	0.138523	0.0298665	0.838798	0.69536	-0.143438	1	171249942	R	II	FMO1	Body	opensea	Body-opensea			TRUE
cg11556164	0.139009	0.705716	4.6553	0.000298159	0.138523	0.0281248	0.749156	0.610147	-0.139009	7	110738315	R	II	LRRN3	5'UTR	opensea	5'UTR-opensea			TRUE
cg13303358	0.111095	0.646533	4.65407	0.000298891	0.138523	0.0256524	0.68125	0.570155	-0.111095	1	245644687	R	II	KIF26B	Body	opensea	Body-opensea			TRUE
cg26400835	0.128407	0.7614	4.65306	0.000299498	0.138523	0.0236056	0.801528	0.673121	-0.128407	12	107103889	R	II	RFX4	Body	opensea	Body-opensea			TRUE
cg01540386	-0.123218	0.239699	-4.64649	0.000303448	0.138903	0.0103846	0.201193	0.324411	0.123218	X	39873535	R	II		IGR	island	IGR-island	chrX:39871532-39874766
cg11275049	0.103643	0.402399	4.64433	0.000304763	0.138903	0.00602225	0.434788	0.331145	-0.103643	3	78556150	R	II		IGR	opensea	IGR-opensea			TRUE
cg06797069	0.143916	0.768546	4.64144	0.000306527	0.139037	0.000201036	0.81352	0.669604	-0.143916	17	37328334	R	II		IGR	shelf	IGR-shelf	chr17:37331425-37331629
cg10636760	0.127186	0.468092	4.63296	0.000311766	0.139037	-0.0168974	0.507838	0.380652	-0.127186	1	2904595	F	I		IGR	opensea	IGR-opensea					rs58605112
cg05096731	-0.121999	0.140665	-4.62888	0.000314319	0.139037	-0.0251237	0.102541	0.22454	0.121999	X	9754594	R	I	SHROOM2	1stExon	island	1stExon-island	chrX:9753566-9755101	TRUE		high-CpG:9714441-9714628
cg06019590	0.109685	0.456346	4.62784	0.000314977	0.139037	-0.0272312	0.490623	0.380938	-0.109685	5	496476	F	II	SLC9A3	Body	shore	Body-shore	chr5:498111-498430	TRUE			rs73730833	rs55996436
cg13390059	0.160351	0.66286	4.62088	0.000319388	0.139037	-0.0412589	0.712969	0.552619	-0.160351	1	88261783	R	II		IGR	opensea	IGR-opensea			TRUE
cg20883684	0.224771	0.826715	4.61515	0.000323073	0.139037	-0.0528294	0.896956	0.672185	-0.224771	2	119917385	R	II	C1QL2	TSS1500	shore	TSS1500-shore	chr2:119914126-119916663					rs57295280
cg13332832	0.122114	0.747081	4.61376	0.000323968	0.139037	-0.0556187	0.785242	0.663128	-0.122114	10	134641061	F	II		IGR	opensea	IGR-opensea					rs75864141
cg09480190	0.125907	0.679925	4.61307	0.000324418	0.139037	-0.0570196	0.71927	0.593364	-0.125907	16	85671771	R	I	KIAA0182	5'UTR	shore	5'UTR-shore	chr16:85670134-85670349	TRUE
cg05987548	-0.148808	0.709349	-4.6126	0.000324724	0.139037	-0.0579697	0.662846	0.811655	0.148808	16	33962359	R	II		IGR	island	IGR-island	chr16:33961237-33962487					rs76793526
cg14011486	-0.177937	0.205693	-4.61019	0.000326292	0.139037	-0.062828	0.150088	0.328025	0.177937	1	26737247	F	I	LIN28	TSS200	island	TSS200-island	chr1:26737246-26738148					rs76068276
cg14011971	-0.121171	0.756605	-4.60996	0.000326443	0.139037	-0.0632961	0.718739	0.83991	0.121171	10	61997974	R	II	ANK3	Body	opensea	Body-opensea			TRUE
cg10593028	0.13917	0.610826	4.6093	0.000326873	0.139037	-0.0646214	0.654317	0.515147	-0.13917	11	108422791	R	II	EXPH5	1stExon	opensea	1stExon-opensea			TRUE
cg26496628	0.120779	0.541942	4.60885	0.000327166	0.139037	-0.0655265	0.579685	0.458906	-0.120779	5	82864340	F	II	VCAN	Body	opensea	Body-opensea			TRUE
cg26542856	0.141733	0.548209	4.60852	0.000327387	0.139037	-0.0662068	0.592501	0.450767	-0.141733	1	82049635	F	II		IGR	opensea	IGR-opensea			TRUE
cg26562263	-0.158575	0.527727	-4.60828	0.000327545	0.139037	-0.0666943	0.478172	0.636747	0.158575	19	21863715	F	II		IGR	shelf	IGR-shelf	chr19:21860792-21861016
cg19015537	0.101357	0.651409	4.60669	0.000328585	0.139037	-0.0698903	0.683083	0.581726	-0.101357	2	147341375	F	II		IGR	shelf	IGR-shelf	chr2:147344801-147345379		TRUE
cg02755669	0.167599	0.642466	4.60585	0.000329139	0.139037	-0.071588	0.694841	0.527242	-0.167599	12	3414090	F	I		IGR	opensea	IGR-opensea		TRUE			rs77467922
cg20169062	0.125975	0.728277	4.60463	0.000329941	0.139037	-0.0740446	0.767644	0.64167	-0.125975	5	53751411	R	II	HSPB3	TSS200	opensea	TSS200-opensea
cg17476910	0.172936	0.463072	4.60455	0.000329995	0.139037	-0.0742074	0.517114	0.344178	-0.172936	1	147806172	R	II		IGR	shore	IGR-shore	chr1:147806900-147807170
cg09929763	0.111773	0.564756	4.59684	0.00033513	0.139037	-0.0897784	0.599685	0.487913	-0.111773	11	358332	F	II		IGR	shore	IGR-shore	chr11:355947-356447
cg10804254	0.121474	0.556717	4.59653	0.000335336	0.139037	-0.0903975	0.594677	0.473204	-0.121474	1	218633247	R	II		IGR	opensea	IGR-opensea		TRUE	TRUE
cg07416291	0.109652	0.538543	4.5959	0.000335761	0.139037	-0.0916766	0.572809	0.463157	-0.109652	5	66138943	R	II	MAST4	Body	opensea	Body-opensea			TRUE
cg02649698	0.106815	0.781031	4.59527	0.000336188	0.139037	-0.0929575	0.81441	0.707595	-0.106815	10	43818854	F	I		IGR	shore	IGR-shore	chr10:43818074-43818604	TRUE
cg22555517	0.113253	0.492779	4.59467	0.000336589	0.139037	-0.0941577	0.52817	0.414917	-0.113253	17	2786995	F	II	RAP1GAP2	Body	opensea	Body-opensea		TRUE	TRUE
cg19448780	0.107054	0.594106	4.59397	0.000337062	0.139037	-0.0955745	0.62756	0.520506	-0.107054	13	112275715	R	II		IGR	island	IGR-island	chr13:112275562-112275794
cg17432748	0.100271	0.802114	4.58601	0.000342483	0.139234	-0.111661	0.833449	0.733178	-0.100271	2	235959556	R	II	SH3BP4	Body	opensea	Body-opensea		TRUE	TRUE
cg27057275	0.10987	0.759426	4.58483	0.000343291	0.139234	-0.114038	0.793761	0.683891	-0.10987	13	77957445	R	II		IGR	opensea	IGR-opensea			TRUE
cg09632936	0.111324	0.793797	4.58353	0.000344188	0.139234	-0.116667	0.828586	0.717262	-0.111324	4	40337262	F	II	CHRNA9	TSS1500	opensea	TSS1500-opensea			TRUE		rs4359945
cg03117697	0.12975	0.449346	4.56438	0.000357658	0.139234	-0.155368	0.489893	0.360144	-0.12975	4	148491949	R	II		IGR	opensea	IGR-opensea			TRUE
cg07934503	0.124579	0.467149	4.5612	0.000359949	0.139234	-0.161802	0.50608	0.381501	-0.124579	X	49639720	F	II		IGR	shelf	IGR-shelf	chrX:49643335-49643654
cg07381502	-0.101126	0.271262	-4.5571	0.000362916	0.139234	-0.170077	0.23966	0.340786	0.101126	X	40440191	R	I	ATP6AP2	TSS200	island	TSS200-island	chrX:40439739-40440705			high-CpG:40325113-40325219
cg16611264	-0.153626	0.255876	-4.55691	0.000363059	0.139234	-0.170475	0.207868	0.361493	0.153626	X	25036057	F	I		IGR	island	IGR-island	chrX:25035822-25036123
cg15441473	0.117874	0.618799	4.55351	0.000365542	0.139234	-0.177344	0.655635	0.53776	-0.117874	10	134838506	R	II		IGR	shelf	IGR-shelf	chr10:134834676-134835899		TRUE
cg22708087	0.118202	0.718315	4.55338	0.000365641	0.139234	-0.177616	0.755253	0.637051	-0.118202	13	32780062	F	II	FRY	Body	opensea	Body-opensea			TRUE
cg18349660	0.112951	0.830186	4.5533	0.000365697	0.139234	-0.17777	0.865483	0.752532	-0.112951	18	55257281	R	II		IGR	shelf	IGR-shelf	chr18:55253544-55254093					rs75861770
cg22121557	-0.122326	0.288131	-4.55232	0.000366415	0.139234	-0.179748	0.249904	0.372231	0.122326	6	28584138	F	I		IGR	island	IGR-island	chr6:28583934-28584289
cg06026334	0.118907	0.68173	4.54951	0.000368492	0.139234	-0.185445	0.718888	0.599981	-0.118907	21	47560127	F	II	FTCD	Body	opensea	Body-opensea		TRUE			rs67915620
cg06565975	0.177974	0.621095	4.54862	0.00036915	0.139234	-0.187241	0.676712	0.498738	-0.177974	8	143823917	R	I	SLURP1	TSS200	shelf	TSS200-shelf	chr8:143820468-143821310
cg10278915	0.127287	0.766669	4.54846	0.000369264	0.139234	-0.187553	0.806446	0.679159	-0.127287	16	88361441	F	I		IGR	opensea	IGR-opensea
cg18927077	-0.13572	0.485842	-4.54704	0.00037032	0.139234	-0.190432	0.443429	0.579149	0.13572	14	103605358	R	II		IGR	island	IGR-island	chr14:103604539-103605504
cg27059228	-0.135805	0.129965	-4.54623	0.000370928	0.139234	-0.192083	0.0875264	0.223331	0.135805	15	89545813	F	II		IGR	opensea	IGR-opensea		TRUE	TRUE
cg05597181	0.101949	0.507075	4.54223	0.000373914	0.139234	-0.200165	0.538934	0.436985	-0.101949	16	88472944	R	I		IGR	opensea	IGR-opensea		TRUE
cg04093349	0.150557	0.810414	4.54142	0.000374522	0.139234	-0.2018	0.857464	0.706906	-0.150557	15	66998947	R	I	SMAD6	Body	shelf	Body-shelf	chr15:66993543-66996571	TRUE	TRUE
cg16182447	-0.188879	0.189644	-4.53883	0.000376476	0.139234	-0.207046	0.130619	0.319498	0.188879	11	69264617	R	II		IGR	opensea	IGR-opensea		TRUE	TRUE
cg25516151	0.184158	0.830884	4.5306	0.00038275	0.140135	-0.223698	0.888433	0.704275	-0.184158	8	18413889	R	II	PSD3	Body	opensea	Body-opensea			TRUE
cg21724239	-0.190832	0.472916	-4.53058	0.000382769	0.140135	-0.22375	0.413281	0.604113	0.190832	8	58056113	R	I		IGR	island	IGR-island	chr8:58055960-58056244
cg00628277	-0.100273	0.510287	-4.52785	0.000384876	0.140436	-0.229279	0.478951	0.579224	0.100273	17	80875739	R	II	TBCD	Body	opensea	Body-opensea		TRUE
cg11210703	0.109245	0.506732	4.52748	0.000385162	0.140436	-0.230028	0.540871	0.431626	-0.109245	4	22693739	F	II	GBA3	TSS1500	opensea	TSS1500-opensea					rs7682224
cg15604182	0.11121	0.697365	4.52349	0.000388263	0.140467	-0.238106	0.732118	0.620908	-0.11121	2	62687964	R	II		IGR	shelf	IGR-shelf	chr2:62684122-62684552
cg00337090	0.114145	0.69568	4.52179	0.000389589	0.140467	-0.241541	0.731351	0.617206	-0.114145	8	23433037	F	II		IGR	shelf	IGR-shelf	chr8:23429038-23429265		TRUE
cg03012374	0.17388	0.385532	4.51894	0.000391827	0.140467	-0.247312	0.43987	0.265989	-0.17388	15	38998010	R	II		IGR	opensea	IGR-opensea			TRUE
cg00791851	-0.162248	0.40884	-4.51624	0.000393962	0.140467	-0.252787	0.358137	0.520385	0.162248	1	76518896	R	II		IGR	opensea	IGR-opensea			TRUE
cg04051278	0.105197	0.788862	4.51619	0.000394003	0.140467	-0.252891	0.821736	0.716539	-0.105197	8	5016451	R	II		IGR	opensea	IGR-opensea			TRUE
cg12915834	0.106196	0.701014	4.51535	0.000394663	0.140467	-0.254576	0.7342	0.628004	-0.106196	6	34895360	F	II	ANKS1A	Body	opensea	Body-opensea			TRUE			rs76690556
cg17035996	0.112649	0.831503	4.51354	0.000396105	0.140467	-0.258252	0.866706	0.754057	-0.112649	5	63985489	R	II	FAM159B	TSS1500	shore	TSS1500-shore	chr5:63986189-63986974
cg02660097	-0.122285	0.66778	-4.50957	0.000399278	0.140467	-0.266287	0.629566	0.751851	0.122285	11	68866761	R	II		IGR	opensea	IGR-opensea
cg02859554	-0.11102	0.296	-4.50863	0.000400039	0.140499	-0.268207	0.261306	0.372326	0.11102	X	19140359	F	I	GPR64	5'UTR	island	5'UTR-island	chrX:19139937-19140629	TRUE
cg22289643	0.1074	0.727119	4.50188	0.000405505	0.14072	-0.281877	0.760681	0.653281	-0.1074	4	3776495	R	II		IGR	shelf	IGR-shelf	chr4:3773851-3774062				rs74802963
cg03957695	0.128029	0.672155	4.50155	0.00040577	0.14072	-0.282534	0.712164	0.584135	-0.128029	1	227733522	F	II		IGR	shelf	IGR-shelf	chr1:227729515-227730492				rs903696
cg16421467	0.118994	0.819077	4.50056	0.000406582	0.14072	-0.284548	0.856262	0.737268	-0.118994	14	67654854	R	II	FAM71D	TSS1500	opensea	TSS1500-opensea
cg05275576	0.106326	0.574323	4.49892	0.000407924	0.14072	-0.287866	0.60755	0.501224	-0.106326	11	130523347	F	II		IGR	opensea	IGR-opensea			TRUE
cg14572252	0.130761	0.614659	4.49172	0.000413883	0.140896	-0.302472	0.655522	0.524761	-0.130761	3	169309425	R	II	MECOM	Body	opensea	Body-opensea			TRUE
cg21059786	0.107353	0.554184	4.48956	0.000415686	0.140944	-0.306849	0.587732	0.480379	-0.107353	2	10361064	R	II		IGR	opensea	IGR-opensea		TRUE	TRUE
cg12869615	-0.10926	0.338025	-4.48801	0.000416988	0.140944	-0.309999	0.303881	0.413142	0.10926	X	101906288	R	II	GPRASP1	TSS200	island	TSS200-island	chrX:101906001-101907017	TRUE
cg04543938	-0.190569	0.356069	-4.48794	0.000417039	0.140944	-0.310122	0.296516	0.487085	0.190569	6	28956426	F	I		IGR	island	IGR-island	chr6:28956106-28956578
cg18074297	-0.134824	0.158023	-4.48502	0.000419499	0.141164	-0.316045	0.11589	0.250714	0.134824	21	36041612	F	II	CLIC6	TSS200	island	TSS200-island	chr21:36041305-36043224				rs73357389
cg09858108	-0.151116	0.46256	-4.48414	0.000420246	0.141234	-0.317836	0.415336	0.566452	0.151116	8	58055024	F	I		IGR	island	IGR-island	chr8:58054945-58055600				rs75466737
cg22039204	0.134554	0.566722	4.47779	0.000425652	0.14131	-0.330707	0.60877	0.474216	-0.134554	5	82855568	R	II	VCAN	Body	opensea	Body-opensea			TRUE
cg12532095	0.107436	0.761805	4.47772	0.000425714	0.14131	-0.330853	0.795379	0.687943	-0.107436	6	166260964	F	II		IGR	opensea	IGR-opensea					rs35842320
cg25548984	0.114001	0.784447	4.47148	0.000431098	0.14131	-0.343506	0.820072	0.706071	-0.114001	4	118007342	F	II	TRAM1L1	TSS1500	shore	TSS1500-shore	chr4:118006538-118006859
cg01286655	-0.113612	0.187733	-4.47023	0.000432185	0.14131	-0.346043	0.152229	0.265841	0.113612	11	12031099	F	II	DKK3	TSS1500	shore	TSS1500-shore	chr11:12029737-12030841	TRUE
cg19640007	0.141294	0.493744	4.4668	0.000435188	0.14131	-0.353014	0.537898	0.396605	-0.141294	4	146600771	R	II	C4orf51	TSS1500	opensea	TSS1500-opensea		TRUE
cg04515667	0.118737	0.66268	4.46468	0.000437048	0.14131	-0.357307	0.699785	0.581048	-0.118737	3	89282776	F	II	EPHA3	Body	opensea	Body-opensea			TRUE
cg05502349	0.118402	0.461861	4.46148	0.000439879	0.14131	-0.363808	0.498862	0.38046	-0.118402	17	41969698	F	II	MPP2	Body	opensea	Body-opensea			TRUE
cg24728949	0.110779	0.656784	4.46045	0.000440791	0.14131	-0.365892	0.691403	0.580624	-0.110779	5	106820169	F	II	EFNA5	Body	opensea	Body-opensea			TRUE
cg25799589	0.104897	0.756708	4.46017	0.000441035	0.14131	-0.36645	0.789489	0.684592	-0.104897	4	146800380	R	II	ZNF827	Body	opensea	Body-opensea			TRUE
cg23414876	0.108333	0.277115	4.45692	0.000443937	0.14131	-0.373053	0.310969	0.202636	-0.108333	16	67197396	R	II	HSF4	5'UTR	island	5'UTR-island	chr16:67196792-67199988		TRUE
cg11806439	0.134386	0.823007	4.45444	0.000446167	0.14131	-0.378095	0.865003	0.730617	-0.134386	14	101157950	F	I		IGR	opensea	IGR-opensea
cg17207724	-0.123005	0.344481	-4.45232	0.000448071	0.14131	-0.382382	0.306042	0.429047	0.123005	X	129244725	R	I	ELF4	TSS1500	island	TSS1500-island	chrX:129243674-129245575			high-CpG:129072103-129072607
cg27452922	0.116197	0.673667	4.45205	0.000448321	0.14131	-0.382944	0.709978	0.593781	-0.116197	16	88361648	F	I		IGR	opensea	IGR-opensea						rs73256152
cg18228590	0.190074	0.770735	4.4499	0.000450267	0.14131	-0.387304	0.830133	0.640059	-0.190074	5	77142469	F	II		IGR	shore	IGR-shore	chr5:77140542-77140914		TRUE		rs7728693
cg01021631	0.111678	0.796168	4.44956	0.000450581	0.14131	-0.388004	0.831067	0.71939	-0.111678	1	56902689	F	II		IGR	opensea	IGR-opensea			TRUE		rs11802109
cg02704790	0.113483	0.833688	4.4482	0.000451814	0.14131	-0.390755	0.869151	0.755668	-0.113483	16	50879053	F	II		IGR	shelf	IGR-shelf	chr16:50875063-50875322
cg13779777	0.111133	0.890219	4.44191	0.00045758	0.14131	-0.403519	0.924948	0.813815	-0.111133	17	79435897	R	II		IGR	opensea	IGR-opensea
cg05687174	0.137306	0.785041	4.44107	0.000458363	0.14131	-0.405241	0.827949	0.690643	-0.137306	5	31382507	F	II		IGR	opensea	IGR-opensea			TRUE
cg06761377	0.110582	0.621905	4.44076	0.000458645	0.14131	-0.405858	0.656462	0.54588	-0.110582	1	16062757	F	II	SLC25A34	TSS200	opensea	TSS200-opensea		TRUE			rs59770242
cg27226153	0.126522	0.76109	4.4394	0.000459902	0.14131	-0.408614	0.800628	0.674106	-0.126522	2	121953958	R	II		IGR	opensea	IGR-opensea			TRUE			rs76118190
cg14872952	0.146645	0.23784	4.4374	0.000461764	0.14131	-0.41268	0.283667	0.137022	-0.146645	4	4867164	R	I		IGR	shore	IGR-shore	chr4:4867386-4867673					rs78089060
cg22863744	-0.149899	0.230352	-4.43562	0.000463424	0.14131	-0.416291	0.183508	0.333407	0.149899	12	124942176	F	II	NCOR2	Body	shore	Body-shore	chr12:124941314-124941584	TRUE
cg25365014	0.121968	0.673498	4.43318	0.000465714	0.141689	-0.421251	0.711612	0.589645	-0.121968	5	2727713	R	II		IGR	opensea	IGR-opensea
cg17749710	0.123568	0.647954	4.42416	0.000474277	0.142015	-0.439586	0.686569	0.563001	-0.123568	5	14915807	R	II		IGR	opensea	IGR-opensea			TRUE
cg09591072	-0.15741	0.340829	-4.4233	0.000475101	0.142015	-0.441332	0.291638	0.449048	0.15741	3	184301468	F	I		IGR	island	IGR-island	chr3:184301117-184302134	TRUE
cg15476602	0.124996	0.747012	4.4163	0.000481863	0.14238	-0.455551	0.786074	0.661078	-0.124996	10	88545743	R	II	BMPR1A	5'UTR	opensea	5'UTR-opensea			TRUE
cg22689630	-0.109019	0.268785	-4.41411	0.000484003	0.14238	-0.46001	0.234717	0.343736	0.109019	19	51568918	F	II	KLK13	TSS1500	shore	TSS1500-shore	chr19:51568154-51568412		TRUE
cg07345934	-0.151769	0.161805	-4.41401	0.000484097	0.14238	-0.460206	0.114378	0.266146	0.151769	1	31845943	F	I	FABP3	TSS200	opensea	TSS200-opensea		TRUE
cg01501760	0.132133	0.705657	4.41243	0.000485649	0.14238	-0.463425	0.746948	0.614815	-0.132133	22	40738706	F	II		IGR	shelf	IGR-shelf	chr22:40742403-40742944
cg24894318	0.132225	0.810695	4.40883	0.000489192	0.142545	-0.470738	0.852015	0.71979	-0.132225	3	104914755	F	II		IGR	opensea	IGR-opensea			TRUE
cg25741597	0.111404	0.842826	4.40636	0.000491635	0.142583	-0.47575	0.87764	0.766236	-0.111404	3	147722622	F	II		IGR	opensea	IGR-opensea			TRUE		rs34452321
cg24283921	-0.174038	0.221538	-4.40427	0.000493723	0.142583	-0.480012	0.167151	0.341189	0.174038	11	10477461	F	II	AMPD3	TSS200	opensea	TSS200-opensea		TRUE	TRUE
cg10495754	-0.184286	0.238091	-4.40235	0.000495639	0.142583	-0.483909	0.180502	0.364788	0.184286	17	27039058	R	II	PROCA1	TSS200	shore	TSS200-shore	chr17:27038084-27038919		TRUE
cg17185705	0.107188	0.742925	4.402	0.000495989	0.142583	-0.484619	0.776421	0.669234	-0.107188	8	89123876	F	II	MMP16	Body	opensea	Body-opensea			TRUE
cg18758559	0.161327	0.489178	4.39452	0.000503552	0.142774	-0.49984	0.539592	0.378266	-0.161327	12	130142114	R	I	TMEM132D	Body	opensea	Body-opensea			TRUE
cg02105641	0.110338	0.865579	4.39343	0.00050466	0.142896	-0.502051	0.900059	0.789721	-0.110338	1	225824580	F	II	ENAH	Body	opensea	Body-opensea			TRUE
cg14323204	-0.101702	0.514793	-4.38505	0.000513278	0.143298	-0.519082	0.483011	0.584713	0.101702	19	22800693	R	II		IGR	island	IGR-island	chr19:22800692-22801041
cg25220537	0.122151	0.601797	4.38161	0.000516864	0.143298	-0.526084	0.639969	0.517818	-0.122151	15	81298068	R	II		IGR	shelf	IGR-shelf	chr15:81292793-81295609
cg10116840	0.104124	0.85898	4.3799	0.000518663	0.143358	-0.529576	0.891519	0.787394	-0.104124	11	128813223	F	II	TP53AIP1	TSS1500	opensea	TSS1500-opensea
cg00837398	0.103448	0.318279	4.37882	0.000519795	0.143358	-0.531769	0.350606	0.247159	-0.103448	7	148958537	F	II	ZNF783	TSS1500	shore	TSS1500-shore	chr7:148958858-148959891
cg20744163	0.156978	0.355298	4.3787	0.000519921	0.143358	-0.532013	0.404353	0.247376	-0.156978	10	80999841	F	I	ZMIZ1	Body	shelf	Body-shelf	chr10:81002109-81003687	TRUE	TRUE		rs1749849
cg01341572	0.103571	0.741183	4.37776	0.000520906	0.143444	-0.533916	0.773549	0.669978	-0.103571	12	121416512	R	I	HNF1A	TSS200	island	TSS200-island	chr12:121416485-121416817
cg15676292	0.185036	0.642727	4.3739	0.000524992	0.143444	-0.541774	0.700551	0.515516	-0.185036	7	141069418	F	II		IGR	opensea	IGR-opensea			TRUE
cg15391499	-0.188655	0.191511	-4.36953	0.00052966	0.143782	-0.550674	0.132557	0.321211	0.188655	5	112630623	F	II	MCC	TSS200	island	TSS200-island	chr5:112630219-112630624			high-CpG:112658245-112658598
cg09611599	-0.137172	0.64308	-4.36758	0.000531756	0.143923	-0.554645	0.600213	0.737386	0.137172	11	20382497	R	II		IGR	shelf	IGR-shelf	chr11:20385161-20385673
cg04004158	0.158456	0.416657	4.36689	0.000532492	0.143993	-0.556035	0.466174	0.307718	-0.158456	16	1152474	F	I		IGR	island	IGR-island	chr16:1152412-1152700				rs35994231
cg11610614	-0.101611	0.16309	-4.36196	0.000537836	0.14451	-0.566075	0.131337	0.232948	0.101611	17	75877811	R	II	FLJ45079	Body	opensea	Body-opensea		TRUE
cg15169914	0.110706	0.332076	4.35517	0.000545287	0.145246	-0.579908	0.366671	0.255965	-0.110706	X	53032460	F	II		IGR	shelf	IGR-shelf	chrX:53029708-53030093
cg00760014	0.118105	0.719957	4.3548	0.000545694	0.145246	-0.580657	0.756865	0.63876	-0.118105	1	19267827	F	II	IFFO2	Body	opensea	Body-opensea		TRUE	TRUE		rs6679392
cg23623851	0.127614	0.734167	4.34892	0.000552232	0.145378	-0.59263	0.774046	0.646432	-0.127614	3	148992037	R	II		IGR	opensea	IGR-opensea			TRUE
cg18743287	0.139911	0.575312	4.34888	0.000552273	0.145378	-0.592705	0.619034	0.479123	-0.139911	19	55575837	F	II	RDH13	TSS1500	shore	TSS1500-shore	chr19:55574138-55574734
cg03850878	0.109783	0.677998	4.34641	0.000555052	0.145378	-0.597748	0.712305	0.602522	-0.109783	4	77724563	R	II		IGR	shore	IGR-shore	chr4:77723092-77723424	TRUE	TRUE
cg21934189	0.120286	0.747512	4.3464	0.000555061	0.145378	-0.597766	0.785101	0.664815	-0.120286	7	68252808	R	II		IGR	opensea	IGR-opensea			TRUE
cg22440848	-0.120547	0.774364	-4.34625	0.000555232	0.145378	-0.598074	0.736693	0.85724	0.120547	4	184320416	F	II		IGR	shore	IGR-shore	chr4:184319564-184320198		TRUE
cg17651887	0.124017	0.706814	4.34415	0.000557597	0.145424	-0.602348	0.745569	0.621552	-0.124017	2	219117224	F	II	ARPC2	Body	opensea	Body-opensea			TRUE
cg06795768	0.104211	0.745105	4.34332	0.000558539	0.145424	-0.604043	0.777671	0.67346	-0.104211	7	34941831	F	I		IGR	opensea	IGR-opensea			TRUE
cg09038962	0.119418	0.826244	4.34214	0.000559875	0.145507	-0.606445	0.863562	0.744144	-0.119418	17	77899679	R	I		IGR	shore	IGR-shore	chr17:77901065-77901333	TRUE	TRUE
cg14613361	0.116675	0.633662	4.34136	0.000560755	0.145646	-0.608023	0.670123	0.553449	-0.116675	1	109751302	R	II		IGR	opensea	IGR-opensea			TRUE
cg16293892	0.235323	0.589366	4.33947	0.000562906	0.145821	-0.611872	0.662905	0.427582	-0.235323	5	77142620	R	I		IGR	shore	IGR-shore	chr5:77140542-77140914		TRUE
cg02932805	-0.138972	0.2276	-4.3382	0.000564364	0.145821	-0.614471	0.184171	0.323143	0.138972	X	40031550	F	I	BCOR	5'UTR	island	5'UTR-island	chrX:40030818-40032181	TRUE
cg25171118	0.103428	0.791678	4.33803	0.000564549	0.145821	-0.614802	0.823999	0.720571	-0.103428	7	134212463	R	II	AKR1B10	1stExon	opensea	1stExon-opensea			TRUE
cg07700843	0.117064	0.51516	4.3348	0.000568258	0.14625	-0.621383	0.551743	0.434679	-0.117064	1	2391317	R	I		IGR	shelf	IGR-shelf	chr1:2387669-2388086	TRUE
cg10614809	-0.184174	0.300162	-4.32734	0.000576918	0.146418	-0.636581	0.242608	0.426781	0.184174	7	51539190	R	I		IGR	opensea	IGR-opensea			TRUE
cg14001165	0.128096	0.797895	4.32627	0.00057817	0.146418	-0.63876	0.837925	0.709829	-0.128096	5	150566089	F	II	CCDC69	Body	opensea	Body-opensea			TRUE
cg08404354	0.106365	0.720079	4.32435	0.000580433	0.146418	-0.642685	0.753318	0.646953	-0.106365	10	115311837	F	II	HABP2	TSS1500	opensea	TSS1500-opensea					rs4387289
cg24162579	0.107691	0.481193	4.32429	0.000580507	0.146418	-0.642812	0.514847	0.407155	-0.107691	1	27817404	R	I	WASF2	TSS1500	shore	TSS1500-shore	chr1:27816342-27816853
cg23238677	0.110887	0.568899	4.31986	0.000585739	0.146418	-0.651828	0.603551	0.492664	-0.110887	2	170157334	F	II	LRP2	Body	opensea	Body-opensea			TRUE
cg01942646	0.10408	0.769449	4.31605	0.000590285	0.146418	-0.659597	0.801974	0.697894	-0.10408	1	27240694	R	II	NR0B2	TSS200	opensea	TSS200-opensea						rs12565886
cg02770794	-0.13867	0.292709	-4.31594	0.000590413	0.146418	-0.659813	0.249375	0.388045	0.13867	X	39872204	R	II		IGR	island	IGR-island	chrX:39871532-39874766		TRUE
cg00159243	-0.128377	0.249137	-4.31576	0.000590627	0.146418	-0.660178	0.209019	0.337396	0.128377	12	109023799	R	I	SELPLG	5'UTR	opensea	5'UTR-opensea		TRUE	TRUE
cg26792576	0.108168	0.7978	4.31386	0.00059292	0.146418	-0.66407	0.831603	0.723435	-0.108168	3	14941947	F	I	FGD5	Body	opensea	Body-opensea			TRUE
cg22773334	0.105297	0.552539	4.31332	0.000593565	0.146418	-0.665162	0.585445	0.480148	-0.105297	10	131569486	R	I		IGR	opensea	IGR-opensea
cg26208507	0.108821	0.464268	4.31321	0.00059369	0.146418	-0.665375	0.498275	0.389454	-0.108821	12	4303167	R	II		IGR	opensea	IGR-opensea			TRUE
cg22026150	0.113331	0.769829	4.31267	0.000594351	0.146418	-0.666492	0.805245	0.691914	-0.113331	8	50653870	R	II		IGR	opensea	IGR-opensea
cg02086355	0.10985	0.824773	4.30725	0.000600923	0.14709	-0.67754	0.859101	0.749251	-0.10985	6	35743107	F	II	C6orf126	TSS1500	shore	TSS1500-shore	chr6:35744225-35744562				rs80102776
cg03748499	0.104407	0.576664	4.30469	0.000604052	0.147135	-0.682757	0.609292	0.504885	-0.104407	8	1981465	F	II		IGR	opensea	IGR-opensea					rs58721325
cg06658615	0.120589	0.436227	4.30328	0.000605778	0.147135	-0.685624	0.473912	0.353322	-0.120589	5	139334561	R	II	NRG2	Body	opensea	Body-opensea			TRUE
cg04922063	0.10245	0.692264	4.30175	0.000607663	0.147135	-0.688745	0.72428	0.621829	-0.10245	10	35683073	R	II	CCNY	Body	opensea	Body-opensea			TRUE
cg03512076	0.108171	0.654201	4.30049	0.000609218	0.147135	-0.691312	0.688004	0.579833	-0.108171	8	103907077	F	II		IGR	opensea	IGR-opensea			TRUE
cg05215420	0.119401	0.680923	4.29743	0.000613019	0.147499	-0.69756	0.718236	0.598835	-0.119401	12	31684880	R	II	DENND5B	Body	opensea	Body-opensea			TRUE
cg14081667	-0.158691	0.357256	-4.29476	0.000616352	0.147675	-0.703005	0.307666	0.466356	0.158691	21	44782497	F	II		IGR	island	IGR-island	chr21:44782248-44782601	TRUE	TRUE
cg23991188	0.102824	0.859345	4.29446	0.000616731	0.147675	-0.703624	0.891477	0.788653	-0.102824	6	29607758	F	II		IGR	opensea	IGR-opensea			TRUE
cg23830205	0.11197	0.706586	4.29264	0.000619009	0.147727	-0.707326	0.741577	0.629607	-0.11197	3	71127516	R	II	FOXP1	Body	opensea	Body-opensea			TRUE
cg17069533	0.117392	0.732763	4.29201	0.000619802	0.147757	-0.708611	0.769448	0.652056	-0.117392	17	64657833	R	II	PRKCA	Body	opensea	Body-opensea		TRUE	TRUE
cg20878925	0.133249	0.750531	4.29017	0.000622124	0.14795	-0.712368	0.792171	0.658922	-0.133249	13	112332120	R	II		IGR	opensea	IGR-opensea
cg17485988	0.132177	0.823146	4.28978	0.000622616	0.14795	-0.713161	0.864451	0.732275	-0.132177	7	52738966	F	II		IGR	opensea	IGR-opensea			TRUE
cg20663846	0.145176	0.617743	4.2897	0.000622721	0.14795	-0.713331	0.66311	0.517934	-0.145176	17	39254439	R	II	KRTAP4-8	TSS200	opensea	TSS200-opensea
cg07449499	0.103993	0.702472	4.28782	0.000625105	0.148094	-0.717169	0.73497	0.630976	-0.103993	6	939195	R	II		IGR	opensea	IGR-opensea			TRUE
cg06240652	0.118107	0.656272	4.28673	0.000626484	0.148131	-0.719381	0.693181	0.575074	-0.118107	2	201312367	F	II	SPATS2L	Body	opensea	Body-opensea			TRUE
cg10606486	0.111046	0.362685	4.28646	0.000626832	0.148131	-0.719938	0.397387	0.28634	-0.111046	18	77608996	R	II		IGR	island	IGR-island	chr18:77608383-77609118
cg22076422	0.16812	0.587575	4.28261	0.000631746	0.148767	-0.72778	0.640113	0.471993	-0.16812	3	63399168	R	II	SYNPR	Body	opensea	Body-opensea			TRUE
cg23316599	-0.171785	0.483918	-4.28173	0.00063288	0.148767	-0.729582	0.430235	0.60202	0.171785	7	57271379	R	I		IGR	island	IGR-island	chr7:57270847-57271464
cg09741917	0.121344	0.740987	4.28141	0.000633291	0.148767	-0.730234	0.778907	0.657564	-0.121344	2	98702260	F	II	VWA3B	TSS1500	shore	TSS1500-shore	chr2:98703354-98703889
cg26557270	0.121722	0.584555	4.27892	0.000636501	0.148971	-0.73531	0.622593	0.500871	-0.121722	6	116382179	R	II	FRK	TSS1500	opensea	TSS1500-opensea			TRUE			rs77304016
cg15195541	0.10778	0.885973	4.27564	0.000640761	0.149333	-0.742008	0.919654	0.811874	-0.10778	8	4188646	R	II	CSMD1	Body	opensea	Body-opensea			TRUE
cg21909390	0.144827	0.707692	4.27547	0.000640986	0.149333	-0.742362	0.752951	0.608124	-0.144827	11	69019375	F	II		IGR	opensea	IGR-opensea					rs7102758
cg23050394	0.106381	0.429226	4.27521	0.000641318	0.149333	-0.742881	0.46247	0.356089	-0.106381	5	123599727	F	II		IGR	opensea	IGR-opensea			TRUE
cg00981879	-0.12135	0.49505	-4.27413	0.000642728	0.149333	-0.745086	0.457128	0.578478	0.12135	X	39680221	F	I		IGR	island	IGR-island	chrX:39680140-39681418	TRUE
cg24000814	-0.210144	0.319235	-4.2727	0.000644602	0.149333	-0.748011	0.253565	0.46371	0.210144	3	184301730	R	I		IGR	island	IGR-island	chr3:184301117-184302134	TRUE
cg25404914	-0.184099	0.266245	-4.27191	0.00064563	0.149333	-0.74961	0.208714	0.392813	0.184099	19	20607771	F	II	ZNF826	TSS200	opensea	TSS200-opensea		TRUE		low-CpG:20399602-20399616
cg17073708	0.133155	0.616206	4.26685	0.000652311	0.14954	-0.759946	0.657817	0.524662	-0.133155	8	55374489	F	II		IGR	shore	IGR-shore	chr8:55370170-55372525
cg24181856	0.168792	0.453707	4.26587	0.000653609	0.14954	-0.761941	0.506455	0.337663	-0.168792	13	113105341	F	I		IGR	shore	IGR-shore	chr13:113106337-113106544				rs57087718
cg16783349	0.108292	0.507298	4.2648	0.000655041	0.14954	-0.764138	0.541139	0.432847	-0.108292	10	130854343	F	I		IGR	opensea	IGR-opensea
cg19307645	-0.140817	0.249355	-4.26424	0.000655779	0.14954	-0.765269	0.205349	0.346167	0.140817	8	95566670	F	I	KIAA1429	TSS1500	shore	TSS1500-shore	chr8:95565657-95566011
cg22298860	0.155542	0.308766	4.26302	0.000657402	0.14954	-0.767751	0.357373	0.201831	-0.155542	6	29690822	F	II	HLA-F	TSS1500	shore	TSS1500-shore	chr6:29691106-29692093	TRUE			rs17875378
cg15664323	0.108527	0.785735	4.26221	0.000658487	0.14954	-0.769406	0.81965	0.711123	-0.108527	6	4427110	R	II		IGR	opensea	IGR-opensea			TRUE			rs76164757
cg03806752	0.103691	0.50482	4.26131	0.000659697	0.14954	-0.771249	0.537223	0.433532	-0.103691	12	53098326	F	II	KRT77	TSS1500	opensea	TSS1500-opensea
cg09640555	0.111986	0.584975	4.25857	0.000663386	0.14954	-0.776847	0.619971	0.507985	-0.111986	4	77406773	F	II	SHROOM3	Body	opensea	Body-opensea			TRUE
cg19704288	-0.100501	0.0924322	-4.25825	0.000663816	0.14954	-0.777498	0.0610256	0.161527	0.100501	4	1582181	R	I		IGR	shore	IGR-shore	chr4:1580050-1580455
cg09084477	-0.120421	0.490024	-4.25783	0.000664379	0.14954	-0.77835	0.452392	0.572814	0.120421	13	41768978	F	II	KBTBD7	TSS1500	shore	TSS1500-shore	chr13:41767827-41768762
cg10383424	0.122324	0.787921	4.25678	0.0006658	0.14954	-0.780493	0.826147	0.703824	-0.122324	6	12586134	R	II		IGR	opensea	IGR-opensea
cg26594335	-0.170578	0.528153	-4.25486	0.000668412	0.14954	-0.784425	0.474847	0.645426	0.170578	5	76010472	R	II	F2R	TSS1500	shore	TSS1500-shore	chr5:76011120-76012292
cg08976646	0.113462	0.738529	4.25359	0.000670141	0.14954	-0.787018	0.773986	0.660525	-0.113462	5	77299683	R	II	AP3B1	Body	opensea	Body-opensea			TRUE
cg08065063	0.106177	0.536201	4.25288	0.0006711	0.14954	-0.788453	0.569381	0.463204	-0.106177	2	11059462	R	II		IGR	opensea	IGR-opensea			TRUE
cg14477114	0.100062	0.874454	4.25278	0.000671247	0.14954	-0.788673	0.905724	0.805662	-0.100062	3	65914296	R	II	MAGI1	Body	opensea	Body-opensea			TRUE
cg01703818	0.121249	0.846178	4.25259	0.000671499	0.14954	-0.789049	0.884069	0.76282	-0.121249	11	78261063	F	II	NARS2	Body	opensea	Body-opensea			TRUE
cg11476737	0.10829	0.707286	4.25188	0.000672467	0.14954	-0.790495	0.741127	0.632837	-0.10829	10	2815189	F	I		IGR	island	IGR-island	chr10:2815003-2815469
cg15769756	0.104934	0.737417	4.25035	0.000674568	0.14954	-0.793626	0.770209	0.665275	-0.104934	13	107489008	F	II		IGR	opensea	IGR-opensea			TRUE
cg22262753	0.143819	0.793583	4.25	0.000675041	0.14954	-0.79433	0.838526	0.694708	-0.143819	6	20932931	R	II	CDKAL1	Body	opensea	Body-opensea			TRUE
cg17984956	0.122051	0.673963	4.24969	0.000675476	0.14954	-0.794977	0.712104	0.590053	-0.122051	7	155711813	F	II		IGR	opensea	IGR-opensea		TRUE	TRUE		rs13240875
cg01627594	0.105373	0.728073	4.2496	0.000675596	0.14954	-0.795155	0.761002	0.655629	-0.105373	6	159241461	F	II	EZR	TSS1500	shore	TSS1500-shore	chr6:159239081-159240775
cg06514855	-0.10625	0.37174	-4.24865	0.000676898	0.14954	-0.797087	0.338537	0.444787	0.10625	17	21220141	F	I		IGR	island	IGR-island	chr17:21219991-21220412		TRUE
cg12159464	0.137067	0.714727	4.24516	0.000681729	0.14954	-0.804225	0.757561	0.620494	-0.137067	8	19295809	R	II	CSGALNACT1	Body	opensea	Body-opensea			TRUE
cg27005118	-0.144603	0.448637	-4.24507	0.000681856	0.14954	-0.804412	0.403448	0.548051	0.144603	17	13972210	R	II	COX10	TSS1500	shore	TSS1500-shore	chr17:13972630-13973085
cg04255675	0.107863	0.773097	4.24354	0.000683976	0.14954	-0.807527	0.806804	0.698942	-0.107863	17	20075915	R	II	CYTSB	Body	opensea	Body-opensea			TRUE
cg11809107	0.152098	0.420986	4.24167	0.000686585	0.14954	-0.811348	0.468517	0.316419	-0.152098	2	3826782	R	II		IGR	opensea	IGR-opensea
cg02161919	-0.151017	0.401614	-4.24078	0.000687834	0.14954	-0.813172	0.354421	0.505438	0.151017	X	19002980	R	I	PHKA2	TSS1500	island	TSS1500-island	chrX:19002003-19003244			high-CpG:18912347-18913029
cg07752793	0.187526	0.626512	4.23992	0.000689034	0.14954	-0.814922	0.685114	0.497588	-0.187526	2	34852273	F	II		IGR	opensea	IGR-opensea
cg01021196	0.117392	0.742271	4.239	0.000690323	0.14954	-0.816798	0.778956	0.661564	-0.117392	14	38340164	F	I		IGR	opensea	IGR-opensea			TRUE
cg27156041	0.111005	0.653623	4.23794	0.000691821	0.14954	-0.818973	0.688312	0.577307	-0.111005	7	98199360	F	II		IGR	opensea	IGR-opensea
cg15822765	-0.190416	0.33287	-4.23787	0.000691922	0.14954	-0.819119	0.273365	0.463781	0.190416	6	28956387	F	I		IGR	island	IGR-island	chr6:28956106-28956578				rs3129792
cg07572930	0.104236	0.675533	4.23695	0.000693209	0.14954	-0.820984	0.708107	0.603871	-0.104236	16	81527107	F	II	CMIP	Body	opensea	Body-opensea		TRUE	TRUE			rs76311388
cg14305701	0.131856	0.781277	4.23553	0.000695222	0.149592	-0.823894	0.822482	0.690626	-0.131856	10	134527922	F	I	INPP5A	Body	island	Body-island	chr10:134527742-134528091	TRUE
cg21640681	0.134664	0.532671	4.23516	0.00069574	0.149592	-0.824641	0.574753	0.44009	-0.134664	X	139177299	F	II		IGR	shelf	IGR-shelf	chrX:139173387-139173767
cg07124687	-0.209118	0.289914	-4.23281	0.000699073	0.149921	-0.829438	0.224565	0.433683	0.209118	6	28956332	F	I		IGR	island	IGR-island	chr6:28956106-28956578				rs10698716
cg17448192	-0.121343	0.674158	-4.23069	0.000702099	0.150187	-0.833771	0.636238	0.757581	0.121343	3	186718821	R	II	ST6GAL1	5'UTR	opensea	5'UTR-opensea			TRUE
cg10784928	-0.160124	0.301502	-4.23013	0.000702895	0.150281	-0.834909	0.251463	0.411587	0.160124	19	19971578	R	II		IGR	island	IGR-island	chr19:19971577-19971863
cg00910015	0.153906	0.804331	4.2287	0.000704946	0.150324	-0.837832	0.852427	0.698521	-0.153906	2	3826621	F	I		IGR	opensea	IGR-opensea					rs72437937
cg19266635	0.12663	0.854518	4.22714	0.000707195	0.150324	-0.841028	0.89409	0.76746	-0.12663	12	46776389	R	I		IGR	shore	IGR-shore	chr12:46776731-46777856
cg10169070	0.116314	0.757173	4.22248	0.000713938	0.150938	-0.850549	0.793521	0.677207	-0.116314	6	114098428	R	II		IGR	opensea	IGR-opensea			TRUE
cg23148948	0.152438	0.677857	4.21862	0.000719573	0.151247	-0.858436	0.725493	0.573056	-0.152438	11	68433135	R	II		IGR	opensea	IGR-opensea
cg20713639	-0.103392	0.219298	-4.216	0.000723412	0.151494	-0.863775	0.186988	0.29038	0.103392	11	65185684	F	I		IGR	shelf	IGR-shelf	chr11:65189463-65190295		TRUE
cg13580834	0.105264	0.674588	4.21582	0.000723679	0.151494	-0.864144	0.707483	0.602219	-0.105264	9	124022933	R	II		IGR	opensea	IGR-opensea			TRUE
cg15893204	0.110714	0.77687	4.21168	0.000729813	0.151494	-0.872611	0.811468	0.700754	-0.110714	1	56247952	R	II		IGR	opensea	IGR-opensea			TRUE
cg18530956	0.137628	0.695529	4.20804	0.000735249	0.151494	-0.880056	0.738538	0.60091	-0.137628	13	100544747	R	II	CLYBL	3'UTR	shelf	3'UTR-shelf	chr13:100547172-100547431		TRUE
cg14118583	0.11865	0.836405	4.20765	0.000735832	0.151494	-0.880851	0.873483	0.754833	-0.11865	9	139885129	R	II		IGR	shore	IGR-shore	chr9:139886312-139887180
cg02393907	0.117553	0.69289	4.20689	0.000736967	0.151494	-0.882397	0.729626	0.612073	-0.117553	7	150011063	F	II	ACTR3C	5'UTR	opensea	5'UTR-opensea			TRUE
cg24401957	0.123324	0.588898	4.20655	0.000737487	0.151494	-0.883104	0.627437	0.504112	-0.123324	7	77179087	R	II	PTPN12	5'UTR	opensea	5'UTR-opensea			TRUE
cg13685151	0.123124	0.875135	4.20643	0.000737659	0.151494	-0.883338	0.913611	0.790487	-0.123124	1	206289463	R	II	C1orf186	TSS1500	opensea	TSS1500-opensea
cg17684202	-0.163253	0.177133	-4.2063	0.000737851	0.151494	-0.883599	0.126116	0.289369	0.163253	4	4874548	F	II		IGR	shore	IGR-shore	chr4:4873262-4873613
cg11784799	0.101049	0.581683	4.20444	0.000740656	0.151518	-0.887405	0.61326	0.512212	-0.101049	8	143262091	F	I		IGR	opensea	IGR-opensea
cg10463299	-0.139178	0.480805	-4.19984	0.000747635	0.15197	-0.896811	0.437312	0.576489	0.139178	20	54987330	R	II	CASS4	5'UTR	opensea	5'UTR-opensea			TRUE
cg26291848	-0.109107	0.49194	-4.19775	0.000750823	0.152118	-0.901078	0.457844	0.566951	0.109107	8	141608316	F	I	EIF2C2	Body	opensea	Body-opensea		TRUE	TRUE
cg08643646	0.129899	0.717155	4.19359	0.000757226	0.152186	-0.909596	0.757749	0.62785	-0.129899	10	128487557	R	I		IGR	opensea	IGR-opensea			TRUE
cg13869366	0.103487	0.514764	4.19143	0.000760562	0.152186	-0.914004	0.547104	0.443617	-0.103487	11	7869666	R	II	OR5E1P	TSS1500	opensea	TSS1500-opensea
cg19143959	0.101045	0.707779	4.18995	0.000762859	0.152186	-0.917027	0.739356	0.638311	-0.101045	15	40572794	R	I		IGR	shore	IGR-shore	chr15:40573628-40576118		TRUE
cg00015930	0.170492	0.798877	4.18916	0.000764094	0.152186	-0.918649	0.852156	0.681663	-0.170492	1	46921746	F	I		IGR	opensea	IGR-opensea
cg26221801	0.111422	0.760566	4.18847	0.000765164	0.152186	-0.920053	0.795386	0.683963	-0.111422	20	62183966	R	I	C20orf195	TSS1500	shore	TSS1500-shore	chr20:62185073-62185572
cg00985817	0.114786	0.46189	4.18843	0.00076523	0.152186	-0.920139	0.49776	0.382975	-0.114786	4	23584720	F	II		IGR	opensea	IGR-opensea			TRUE		rs75023074
cg03462096	0.146926	0.714146	4.18657	0.000768138	0.152299	-0.923943	0.760061	0.613134	-0.146926	14	56157197	F	II		IGR	opensea	IGR-opensea			TRUE
cg17655451	0.127644	0.557239	4.18656	0.000768155	0.152299	-0.923965	0.597128	0.469484	-0.127644	5	53959665	F	II		IGR	opensea	IGR-opensea			TRUE
cg06572974	0.114065	0.857083	4.18639	0.000768421	0.152299	-0.924311	0.892728	0.778663	-0.114065	15	93442219	F	II	CHD2	TSS1500	opensea	TSS1500-opensea
cg15463989	0.10893	0.813032	4.18592	0.000769159	0.152299	-0.925275	0.847072	0.738143	-0.10893	7	137519766	R	II	DGKI	Body	opensea	Body-opensea			TRUE
cg02695969	-0.145468	0.176873	-4.18414	0.000771951	0.152426	-0.928907	0.131414	0.276881	0.145468	19	932813	R	II	ARID3A	Body	island	Body-island	chr19:932598-932845	TRUE
cg03135023	0.105836	0.794302	4.1835	0.000772963	0.152426	-0.930221	0.827376	0.72154	-0.105836	11	2871856	F	I		IGR	island	IGR-island	chr11:2871364-2871940
cg19871348	-0.132443	0.14508	-4.18244	0.000774637	0.152501	-0.932391	0.103691	0.236134	0.132443	7	127775630	R	II		IGR	island	IGR-island	chr7:127775629-127776442		TRUE
cg18311665	0.127428	0.556164	4.17819	0.000781375	0.152958	-0.941074	0.595985	0.468557	-0.127428	14	79483171	F	II	NRXN3	Body	opensea	Body-opensea			TRUE
cg21110576	0.152136	0.60827	4.17667	0.000783803	0.15311	-0.944184	0.655813	0.503677	-0.152136	4	57998425	R	II		IGR	opensea	IGR-opensea			TRUE
cg23619910	-0.12942	0.105495	-4.17534	0.000785928	0.15316	-0.946899	0.065051	0.194471	0.12942	11	10477452	R	II	AMPD3	TSS200	opensea	TSS200-opensea		TRUE	TRUE
cg23688111	0.118744	0.349945	4.1749	0.000786628	0.15316	-0.947791	0.387052	0.268308	-0.118744	2	234825859	R	II	TRPM8	TSS200	opensea	TSS200-opensea			TRUE
cg03226844	0.101983	0.872895	4.17416	0.000787832	0.15316	-0.949324	0.904764	0.802782	-0.101983	17	185102	F	I	RPH3AL	5'UTR	island	5'UTR-island	chr17:185075-185296		TRUE
cg19162496	0.126839	0.423142	4.17221	0.000790965	0.153228	-0.953303	0.462779	0.33594	-0.126839	4	77356175	R	II	SHROOM3	TSS200	opensea	TSS200-opensea						rs79948330
cg00026909	0.110766	0.189362	4.17115	0.000792674	0.153347	-0.955467	0.223976	0.11321	-0.110766	1	58089001	F	II	DAB1	5'UTR	opensea	5'UTR-opensea			TRUE		rs12117856
cg20090782	0.15367	0.733727	4.16826	0.000797364	0.153526	-0.961381	0.781749	0.628079	-0.15367	18	42323716	R	II	SETBP1	Body	shore	Body-shore	chr18:42324454-42324966		TRUE
cg05477457	-0.137175	0.374533	-4.16788	0.000797984	0.153526	-0.96216	0.331666	0.468841	0.137175	4	169799308	F	I	PALLD	Body	island	Body-island	chr4:169799086-169799625	TRUE
cg24853040	0.123573	0.674915	4.16766	0.000798343	0.153526	-0.962611	0.713532	0.589959	-0.123573	7	23040239	R	II	FAM126A	5'UTR	opensea	5'UTR-opensea			TRUE
cg20826442	0.113799	0.571284	4.16705	0.000799343	0.153607	-0.963866	0.606846	0.493048	-0.113799	7	81305782	F	II		IGR	opensea	IGR-opensea			TRUE
cg09844094	0.120475	0.777785	4.16525	0.000802281	0.153871	-0.967543	0.815434	0.694959	-0.120475	6	12586063	F	II		IGR	opensea	IGR-opensea					rs16873026
cg11938738	0.138806	0.686029	4.16393	0.000804446	0.15413	-0.970245	0.729406	0.590601	-0.138806	6	134999799	F	II		IGR	opensea	IGR-opensea			TRUE
cg24410453	0.125047	0.583207	4.16173	0.000808057	0.154194	-0.974733	0.622284	0.497237	-0.125047	6	53919041	R	II	C6orf142	Body	opensea	Body-opensea		TRUE	TRUE
cg13261106	0.128953	0.784069	4.1615	0.00080844	0.154194	-0.975208	0.824367	0.695414	-0.128953	14	55999890	F	II		IGR	opensea	IGR-opensea			TRUE
cg23879743	0.106787	0.661992	4.15992	0.000811044	0.154194	-0.978432	0.695363	0.588576	-0.106787	4	170897284	F	II		IGR	opensea	IGR-opensea			TRUE
cg11917579	0.116235	0.742809	4.15974	0.000811356	0.154194	-0.978816	0.779132	0.662897	-0.116235	10	2815429	R	II		IGR	island	IGR-island	chr10:2815003-2815469
cg01190276	0.121473	0.721486	4.1597	0.000811423	0.154194	-0.9789	0.759446	0.637974	-0.121473	3	24284272	F	II	THRB	5'UTR	opensea	5'UTR-opensea			TRUE
cg21829783	-0.120026	0.430953	-4.15643	0.000816847	0.154194	-0.985577	0.393445	0.51347	0.120026	1	160493089	R	II	SLAMF6	TSS200	opensea	TSS200-opensea
cg04248332	0.158856	0.761842	4.15599	0.000817589	0.154194	-0.986487	0.811484	0.652629	-0.158856	1	31423071	R	I	SNORD103A	TSS1500	opensea	TSS1500-opensea				low-CpG:31195649-31195672
cg06640662	0.141364	0.638905	4.15528	0.000818768	0.154194	-0.987932	0.683082	0.541717	-0.141364	10	118082519	R	II	C10orf96	TSS1500	opensea	TSS1500-opensea
cg04669574	-0.15157	0.205105	-4.1546	0.000819901	0.154194	-0.989318	0.157739	0.309309	0.15157	12	50297945	R	I	FAIM2	TSS1500	island	TSS1500-island	chr12:50297580-50297988	TRUE	TRUE		rs297918
cg14831390	-0.11066	0.27192	-4.15372	0.000821384	0.154221	-0.991129	0.237339	0.347999	0.11066	X	30671327	F	I	GK	TSS200	island	TSS200-island	chrX:30670739-30671869
cg07853425	0.101644	0.528627	4.15123	0.000825562	0.154386	-0.996213	0.560391	0.458747	-0.101644	5	134408820	F	II		IGR	opensea	IGR-opensea			TRUE		rs7717515
cg07121856	-0.17182	0.226097	-4.14802	0.000830994	0.15459	-1.00279	0.172403	0.344223	0.17182	7	95025736	F	I	PON3	TSS200	island	TSS200-island	chr7:95025559-95026122
cg26320244	0.10874	0.544373	4.14358	0.000838565	0.15459	-1.01187	0.578354	0.469614	-0.10874	12	132663455	F	I		IGR	island	IGR-island	chr12:132663322-132663748
cg01351327	0.121203	0.735015	4.14239	0.000840597	0.15459	-1.0143	0.772891	0.651688	-0.121203	13	46279536	R	II	SPERT	Body	opensea	Body-opensea			TRUE
cg25271976	0.11808	0.796827	4.14207	0.000841158	0.15459	-1.01497	0.833727	0.715646	-0.11808	2	9894165	F	II		IGR	opensea	IGR-opensea			TRUE
cg14538785	0.141496	0.702791	4.14015	0.000844461	0.15459	-1.01889	0.747008	0.605512	-0.141496	9	112112130	F	II		IGR	opensea	IGR-opensea		TRUE	TRUE
cg22799510	0.144071	0.783755	4.13983	0.000845015	0.15459	-1.01955	0.828778	0.684706	-0.144071	3	71820909	R	II	PROK2	3'UTR	opensea	3'UTR-opensea			TRUE
cg19249516	0.117187	0.564851	4.13944	0.000845677	0.15459	-1.02034	0.601472	0.484285	-0.117187	4	156667493	R	II		IGR	opensea	IGR-opensea			TRUE
cg06526872	0.115754	0.25281	4.13591	0.000851804	0.15459	-1.02757	0.288983	0.173229	-0.115754	1	44399363	F	II	ARTN	1stExon	island	1stExon-island	chr1:44399068-44399535		TRUE
cg19937572	0.127499	0.841247	4.13424	0.000854711	0.154681	-1.03098	0.88109	0.753591	-0.127499	13	101091946	F	II	PCCA	Body	opensea	Body-opensea			TRUE		rs76081580
cg27178569	0.109287	0.715037	4.1316	0.000859332	0.154876	-1.03638	0.749189	0.639902	-0.109287	15	49937400	F	II		IGR	opensea	IGR-opensea			TRUE
cg21212076	-0.10852	0.511501	-4.13158	0.000859377	0.154876	-1.03644	0.477588	0.586108	0.10852	9	35564052	R	II	FAM166B	TSS200	opensea	TSS200-opensea
cg10941424	0.125712	0.625598	4.13139	0.000859701	0.154876	-1.03681	0.664883	0.539171	-0.125712	12	5294958	R	II		IGR	opensea	IGR-opensea			TRUE
cg09042966	0.108219	0.63375	4.13066	0.000860989	0.154876	-1.03831	0.667569	0.55935	-0.108219	13	103840341	R	II		IGR	opensea	IGR-opensea			TRUE
cg26950369	0.117477	0.643642	4.1287	0.000864443	0.154876	-1.04232	0.680354	0.562877	-0.117477	2	167816565	R	II	XIRP2	Body	opensea	Body-opensea			TRUE
cg27043880	0.137325	0.584555	4.12721	0.00086707	0.154876	-1.04536	0.627469	0.490144	-0.137325	1	239287722	R	II		IGR	opensea	IGR-opensea			TRUE
cg00966557	0.106244	0.748242	4.1263	0.000868695	0.154946	-1.04724	0.781443	0.6752	-0.106244	5	149219027	F	II	PPARGC1B	Body	opensea	Body-opensea		TRUE	TRUE
cg16963127	0.120512	0.739303	4.12535	0.000870386	0.155173	-1.04919	0.776963	0.656451	-0.120512	6	131336044	F	II	EPB41L2	5'UTR	opensea	5'UTR-opensea			TRUE		rs35845100
cg27117982	0.101378	0.603579	4.12393	0.000872907	0.155291	-1.05208	0.635259	0.533882	-0.101378	12	16500077	F	II	MGST1	TSS1500	opensea	TSS1500-opensea
cg06922599	-0.105461	0.648133	-4.12066	0.000878759	0.155388	-1.05878	0.615176	0.720637	0.105461	12	3427727	F	II		IGR	opensea	IGR-opensea					rs10848847
cg15975806	0.115368	0.48723	4.1194	0.000881022	0.155611	-1.06135	0.523282	0.407915	-0.115368	13	110319607	R	I		IGR	opensea	IGR-opensea
cg25271479	0.196507	0.193401	4.11638	0.000886478	0.156103	-1.06754	0.254809	0.0583027	-0.196507	11	1457346	R	II	BRSK2	Body	opensea	Body-opensea			TRUE
cg23054119	0.12758	0.83295	4.11453	0.000889842	0.156122	-1.07133	0.872819	0.745239	-0.12758	1	233659267	F	II		IGR	opensea	IGR-opensea			TRUE		rs1497090
cg07539121	0.133673	0.256581	4.11397	0.000890861	0.156122	-1.07248	0.298354	0.164681	-0.133673	5	55606711	F	II		IGR	opensea	IGR-opensea			TRUE
cg26683025	0.130646	0.75421	4.11357	0.000891593	0.156122	-1.0733	0.795037	0.664391	-0.130646	11	65560420	R	I	OVOL1	Body	opensea	Body-opensea		TRUE
cg03473087	0.122215	0.814686	4.1127	0.000893179	0.156141	-1.07508	0.852878	0.730663	-0.122215	10	22882894	F	II	PIP4K2A	Body	opensea	Body-opensea			TRUE
cg01807407	-0.104823	0.189048	-4.10968	0.000898708	0.156729	-1.08126	0.156291	0.261114	0.104823	6	6004686	F	II	NRN1	Body	island	Body-island	chr6:6002471-6005125	TRUE
cg22699361	0.108477	0.6579	4.10962	0.000898817	0.156729	-1.08138	0.691799	0.583322	-0.108477	1	854918	R	I	FLJ39609	TSS200	island	TSS200-island	chr1:854765-854973
cg14716323	0.11417	0.844141	4.10913	0.000899727	0.156729	-1.08239	0.879819	0.765649	-0.11417	2	207194123	R	II		IGR	opensea	IGR-opensea			TRUE
cg01111006	0.125364	0.82997	4.10879	0.000900345	0.156729	-1.08308	0.869146	0.743782	-0.125364	6	11161658	F	II		IGR	opensea	IGR-opensea			TRUE
cg20376009	-0.117842	0.635889	-4.10707	0.000903523	0.156729	-1.08661	0.599064	0.716906	0.117842	16	34296108	F	II		IGR	island	IGR-island	chr16:34295486-34296109				rs77486864
cg20824989	-0.131197	0.144462	-4.10666	0.000904281	0.156729	-1.08745	0.103463	0.23466	0.131197	2	208491939	F	I		IGR	shore	IGR-shore	chr2:208489428-208491030				rs2709394
cg27505349	0.100641	0.569542	4.10462	0.000908063	0.157144	-1.09163	0.600992	0.500352	-0.100641	6	30687197	F	II	TUBB	TSS1500	shore	TSS1500-shore	chr6:30687941-30688213
cg24675673	0.12122	0.712476	4.10372	0.000909727	0.15715	-1.09346	0.750357	0.629138	-0.12122	12	28204448	F	II		IGR	opensea	IGR-opensea			TRUE
cg01218619	-0.169555	0.213787	-4.10313	0.000910822	0.15715	-1.09467	0.160801	0.330356	0.169555	4	25090298	R	I		IGR	island	IGR-island	chr4:25090106-25090510		TRUE
cg24595586	0.108945	0.769748	4.10298	0.000911104	0.15715	-1.09498	0.803793	0.694848	-0.108945	1	172009861	F	II	DNM3	Body	opensea	Body-opensea			TRUE
cg20887366	-0.116325	0.354229	-4.10287	0.000911318	0.15715	-1.09521	0.317878	0.434203	0.116325	X	40440209	R	I	ATP6AP2	TSS200	island	TSS200-island	chrX:40439739-40440705			high-CpG:40325113-40325219
cg18583697	0.108614	0.718717	4.10258	0.000911861	0.15715	-1.09581	0.752659	0.644045	-0.108614	8	35576222	F	II	UNC5D	Body	opensea	Body-opensea			TRUE
cg08883213	-0.123728	0.552418	-4.10149	0.000913878	0.15715	-1.09802	0.513753	0.637481	0.123728	19	55728836	R	I		IGR	shore	IGR-shore	chr19:55728345-55728629
cg03991309	0.123753	0.537321	4.09995	0.000916778	0.157427	-1.10119	0.575994	0.452241	-0.123753	1	68237761	R	II	GNG12	5'UTR	opensea	5'UTR-opensea			TRUE
cg00812096	0.13196	0.827837	4.09707	0.000922176	0.157728	-1.10707	0.869074	0.737115	-0.13196	13	80584487	R	II		IGR	opensea	IGR-opensea
cg18316500	0.100364	0.597706	4.09645	0.00092336	0.157728	-1.10836	0.62907	0.528706	-0.100364	5	177855654	R	I	COL23A1	Body	opensea	Body-opensea			TRUE
cg18947360	0.101717	0.323998	4.09499	0.00092611	0.157728	-1.11133	0.355784	0.254068	-0.101717	1	11112976	R	I		IGR	opensea	IGR-opensea			TRUE
cg02100381	0.109384	0.595915	4.09482	0.000926438	0.157728	-1.11169	0.630097	0.520713	-0.109384	13	111025711	F	II	COL4A2	Body	opensea	Body-opensea			TRUE
cg09006292	0.106729	0.764939	4.0939	0.000928178	0.157728	-1.11357	0.798291	0.691562	-0.106729	3	64049408	R	II		IGR	opensea	IGR-opensea			TRUE
cg26693681	0.108902	0.422484	4.09263	0.000930605	0.157728	-1.11618	0.456515	0.347613	-0.108902	5	91303031	R	II		IGR	opensea	IGR-opensea			TRUE
cg15494117	-0.120934	0.102671	-4.09119	0.00093334	0.157728	-1.11912	0.0648788	0.185813	0.120934	3	169482895	F	I	TERC	TSS200	island	TSS200-island	chr3:169482338-169483052
cg20607798	-0.138963	0.261778	-4.08927	0.000937013	0.157728	-1.12305	0.218352	0.357315	0.138963	8	58055168	F	I		IGR	island	IGR-island	chr8:58054945-58055600
cg25356456	0.107712	0.566625	4.08684	0.000941693	0.157728	-1.12804	0.600285	0.492573	-0.107712	8	143262440	R	II		IGR	opensea	IGR-opensea
cg25941154	0.102396	0.648611	4.08655	0.000942256	0.157728	-1.12864	0.68061	0.578214	-0.102396	7	28208557	R	II	JAZF1	Body	opensea	Body-opensea			TRUE
cg26309194	-0.134762	0.208499	-4.08585	0.000943598	0.157728	-1.13006	0.166386	0.301148	0.134762	21	42880557	R	I	TMPRSS2	TSS1500	island	TSS1500-island	chr21:42878751-42880674
cg15171911	-0.10563	0.397977	-4.08431	0.000946576	0.157728	-1.13321	0.364967	0.470597	0.10563	18	53068921	F	II	TCF4	Body	opensea	Body-opensea			TRUE	low-CpG:51219916-51219945
cg14563485	0.118348	0.781276	4.08317	0.000948792	0.157728	-1.13556	0.818259	0.699911	-0.118348	19	36860285	R	II	ZFP14	TSS1500	opensea	TSS1500-opensea
cg21488396	0.105765	0.702893	4.07983	0.000955298	0.157728	-1.1424	0.735944	0.630179	-0.105765	11	127445168	R	II		IGR	opensea	IGR-opensea			TRUE		rs12290895
cg11940526	0.106269	0.726342	4.0786	0.000957702	0.157728	-1.14491	0.759551	0.653283	-0.106269	10	80311367	R	II		IGR	opensea	IGR-opensea			TRUE
cg18351999	-0.133604	0.296347	-4.07837	0.000958144	0.157728	-1.14537	0.254595	0.388199	0.133604	11	406901	R	II	SIGIRR	Body	island	Body-island	chr11:406491-407871		TRUE
cg21205855	0.134911	0.316806	4.07715	0.000960545	0.157728	-1.14788	0.358965	0.224055	-0.134911	8	61563866	R	I		IGR	shore	IGR-shore	chr8:61564204-61565152
cg14478663	0.119781	0.442143	4.07649	0.000961854	0.157728	-1.14924	0.479574	0.359793	-0.119781	14	51643693	F	II		IGR	opensea	IGR-opensea			TRUE
cg27449200	-0.144801	0.119001	-4.07522	0.000964354	0.157728	-1.15184	0.0737502	0.218552	0.144801	15	80938098	R	II		IGR	opensea	IGR-opensea			TRUE
cg07947531	0.139383	0.806216	4.07478	0.000965212	0.157728	-1.15273	0.849773	0.71039	-0.139383	1	32252266	F	II		IGR	shore	IGR-shore	chr1:32254004-32254353
cg05279738	0.125128	0.46282	4.07239	0.000969958	0.157728	-1.15764	0.501923	0.376795	-0.125128	3	141560204	R	II		IGR	opensea	IGR-opensea			TRUE
cg15039826	-0.146295	0.24536	-4.07191	0.000970901	0.157728	-1.15861	0.199642	0.345938	0.146295	X	39958196	F	I	BCOR	TSS1500	island	TSS1500-island	chrX:39953434-39969247
cg16976876	-0.1259	0.343166	-4.07131	0.000972108	0.157728	-1.15985	0.303822	0.429723	0.1259	X	10124911	R	I	CLCN4	TSS200	shore	TSS200-shore	chrX:10126320-10126882	TRUE	TRUE
cg17646392	0.101551	0.586725	4.07088	0.000972945	0.157728	-1.16072	0.61846	0.516909	-0.101551	2	237702390	R	I		IGR	opensea	IGR-opensea
cg26039623	0.118617	0.642692	4.07037	0.000973974	0.157728	-1.16177	0.67976	0.561143	-0.118617	4	40485458	F	II	RBM47	5'UTR	opensea	5'UTR-opensea			TRUE		rs79524349
cg08219700	-0.225737	0.566818	-4.06958	0.000975555	0.157755	-1.1634	0.496275	0.722012	0.225737	8	58056026	R	II		IGR	island	IGR-island	chr8:58055960-58056244
cg15478981	0.14203	0.642372	4.06816	0.000978383	0.157781	-1.16629	0.686756	0.544726	-0.14203	6	39637466	R	II	KIF6	Body	opensea	Body-opensea			TRUE
cg25956097	0.11469	0.754162	4.06811	0.00097849	0.157781	-1.1664	0.790002	0.675312	-0.11469	10	44163499	F	II		IGR	island	IGR-island	chr10:44162850-44163531
cg09125316	-0.107727	0.28445	-4.06765	0.000979404	0.157781	-1.16734	0.250786	0.358513	0.107727	7	1015418	R	II	COX19	TSS200	shore	TSS200-shore	chr7:1014698-1015239				rs7811207
cg05958922	0.105003	0.4132	4.06596	0.000982797	0.157821	-1.1708	0.446013	0.34101	-0.105003	1	231319825	R	II	TRIM67	Body	opensea	Body-opensea			TRUE
cg24204282	0.105499	0.129689	4.0623	0.000990204	0.157863	-1.17831	0.162657	0.0571583	-0.105499	11	45944920	R	II	GYLTL1B	Body	shore	Body-shore	chr11:45943513-45944852	TRUE
cg14824921	0.110979	0.566162	4.0623	0.000990205	0.157863	-1.17831	0.600843	0.489863	-0.110979	4	57922113	R	II	IGFBP7	Body	opensea	Body-opensea			TRUE		rs1718835
cg10951591	0.112455	0.479596	4.0605	0.000993851	0.158027	-1.18199	0.514738	0.402283	-0.112455	2	3933739	R	II		IGR	opensea	IGR-opensea
cg23785719	0.224122	0.42202	4.05813	0.000998689	0.15807	-1.18685	0.492059	0.267937	-0.224122	7	43622659	R	I	STK17A	TSS200	shore	TSS200-shore	chr7:43622682-43623392			high-CpG:43589163-43589276
cg05573809	0.157375	0.4182	4.05555	0.00100399	0.15807	-1.19214	0.46738	0.310004	-0.157375	5	14036481	F	II		IGR	opensea	IGR-opensea		TRUE	TRUE		rs12186457
cg07110008	0.115124	0.355324	4.05498	0.00100514	0.15807	-1.19329	0.3913	0.276176	-0.115124	16	1158991	R	II		IGR	shelf	IGR-shelf	chr16:1154940-1155319				rs74001197
cg06378617	0.106383	0.611236	4.05313	0.00100897	0.15807	-1.19709	0.64448	0.538098	-0.106383	17	39095141	F	II	KRT23	TSS1500	opensea	TSS1500-opensea
cg10008347	-0.180744	0.33172	-4.05097	0.00101344	0.15807	-1.20151	0.275238	0.455982	0.180744	X	39958040	R	II	BCOR	TSS1500	island	TSS1500-island	chrX:39953434-39969247
cg04959480	-0.10489	0.463153	-4.05081	0.00101377	0.15807	-1.20185	0.430374	0.535265	0.10489	4	154711675	R	I	SFRP2	TSS1500	shore	TSS1500-shore	chr4:154712073-154712706					rs10031991
cg01598009	-0.139572	0.711148	-4.05062	0.00101418	0.15807	-1.20224	0.667532	0.807104	0.139572	6	30286162	F	II	HCG18	Body	opensea	Body-opensea			TRUE
cg13641198	0.159173	0.733483	4.04824	0.00101912	0.15807	-1.20711	0.783224	0.624051	-0.159173	9	16044344	F	II		IGR	opensea	IGR-opensea			TRUE
cg18561589	-0.129718	0.410612	-4.04776	0.00102012	0.15807	-1.20809	0.370075	0.499793	0.129718	10	119295770	F	II	EMX2OS	Body	island	Body-island	chr10:119293917-119297675	TRUE
cg09984096	0.127452	0.654008	4.04656	0.00102263	0.15807	-1.21055	0.693836	0.566385	-0.127452	8	17195444	R	II	MTMR7	Body	opensea	Body-opensea			TRUE
cg16442712	0.117769	0.670295	4.04648	0.00102281	0.15807	-1.21072	0.707098	0.589328	-0.117769	10	24539322	F	II	KIAA1217	Body	opensea	Body-opensea			TRUE		rs66479835
cg23029573	0.159989	0.486986	4.04591	0.00102399	0.15807	-1.21188	0.536983	0.376993	-0.159989	15	26348105	R	I		IGR	opensea	IGR-opensea			TRUE
cg07868599	-0.124424	0.170778	-4.04421	0.00102756	0.15807	-1.21536	0.131895	0.256319	0.124424	16	3079708	F	I	CCDC64B	Body	island	Body-island	chr16:3079536-3079954	TRUE	TRUE
cg06829686	-0.102913	0.3524	-4.04195	0.00103234	0.15807	-1.22	0.32024	0.423152	0.102913	1	47910843	F	I		IGR	island	IGR-island	chr1:47909712-47911020		TRUE
cg08954277	0.10699	0.259222	4.04151	0.00103327	0.15807	-1.2209	0.292657	0.185667	-0.10699	4	1535673	F	I		IGR	shore	IGR-shore	chr4:1534542-1534987
cg12064213	-0.116871	0.454202	-4.04092	0.00103452	0.15807	-1.22211	0.41768	0.534551	0.116871	X	9982520	R	II	WWC3	TSS1500	island	TSS1500-island	chrX:9982513-9984583
cg05346611	0.126787	0.80198	4.04033	0.00103577	0.15807	-1.22332	0.841601	0.714814	-0.126787	14	94855088	F	II	SERPINA1	5'UTR	opensea	5'UTR-opensea			TRUE	low-CpG:93924680-93924916	rs55973910
cg06623625	0.107815	0.807386	4.03973	0.00103705	0.1581	-1.22456	0.841078	0.733264	-0.107815	4	139137902	R	II	SLC7A11	Body	opensea	Body-opensea			TRUE
cg04061506	0.107112	0.661459	4.03747	0.00104187	0.158109	-1.22919	0.694932	0.587819	-0.107112	2	48137261	R	II		IGR	shelf	IGR-shelf	chr2:48133739-48134052
cg27417997	0.13984	0.340467	4.03724	0.00104235	0.158109	-1.22965	0.384167	0.244327	-0.13984	4	77356416	F	II	SHROOM3	1stExon	opensea	1stExon-opensea			TRUE
cg08410691	0.152422	0.625081	4.03565	0.00104576	0.158109	-1.23292	0.672712	0.520291	-0.152422	7	1753909	F	I	ELFN1	5'UTR	shore	5'UTR-shore	chr7:1753446-1753706	TRUE	TRUE
cg18544888	0.132738	0.64337	4.0355	0.00104607	0.158109	-1.23321	0.684851	0.552112	-0.132738	2	122259959	F	II	CLASP1	Body	opensea	Body-opensea			TRUE
cg21858462	0.1197	0.365218	4.03545	0.00104617	0.158109	-1.23331	0.402624	0.282924	-0.1197	13	112628448	F	II		IGR	shore	IGR-shore	chr13:112627428-112627642		TRUE
cg03472130	0.139974	0.616014	4.03529	0.00104653	0.158109	-1.23366	0.659756	0.519782	-0.139974	15	71717382	F	II	THSD4	Body	opensea	Body-opensea			TRUE
cg18437209	-0.124849	0.499818	-4.03527	0.00104658	0.158109	-1.2337	0.460803	0.585652	0.124849	11	35105199	F	II		IGR	opensea	IGR-opensea		TRUE	TRUE
cg20042662	0.133288	0.629399	4.03213	0.00105332	0.158427	-1.24012	0.671052	0.537764	-0.133288	8	143535580	F	I		IGR	island	IGR-island	chr8:143535484-143535892		TRUE
cg06489728	0.170271	0.746275	4.03065	0.00105653	0.158613	-1.24316	0.799485	0.629214	-0.170271	10	130935309	F	I		IGR	opensea	IGR-opensea
cg21140079	0.103184	0.855696	4.0305	0.00105685	0.158613	-1.24347	0.887941	0.784757	-0.103184	1	162667252	R	II	DDR2	5'UTR	opensea	5'UTR-opensea			TRUE
cg12017635	0.128668	0.534026	4.02979	0.00105839	0.158613	-1.24493	0.574235	0.445567	-0.128668	12	72343656	R	II	TPH2	Body	opensea	Body-opensea			TRUE
cg12253071	0.129215	0.557545	4.02924	0.00105958	0.158613	-1.24604	0.597925	0.468709	-0.129215	4	19740944	F	II		IGR	opensea	IGR-opensea			TRUE
cg25881383	0.105783	0.73805	4.029	0.0010601	0.158613	-1.24654	0.771107	0.665324	-0.105783	1	59680599	R	II		IGR	opensea	IGR-opensea			TRUE
cg26862706	0.130044	0.727393	4.02306	0.00107309	0.159069	-1.25872	0.768032	0.637988	-0.130044	11	120403285	R	II		IGR	opensea	IGR-opensea		TRUE	TRUE
cg19986012	0.124647	0.758401	4.02136	0.00107685	0.159296	-1.26221	0.797353	0.672707	-0.124647	17	46627848	R	I	HOXB3	Body	island	Body-island	chr17:46627787-46628444		TRUE
cg14898623	-0.190279	0.173102	-4.01886	0.00108237	0.159296	-1.26732	0.113639	0.303918	0.190279	12	124941871	F	II	NCOR2	Body	shore	Body-shore	chr12:124941314-124941584	TRUE
cg25830696	-0.145067	0.152203	-4.01578	0.00108922	0.159296	-1.27364	0.106869	0.251937	0.145067	17	42030479	R	I	PYY	Body	island	Body-island	chr17:42030173-42030941	TRUE	TRUE
cg13152535	-0.101595	0.242253	-4.01552	0.00108981	0.159296	-1.27417	0.210505	0.3121	0.101595	19	51226557	R	II	CLEC11A	TSS200	shore	TSS200-shore	chr19:51227661-51228883		TRUE
cg25356639	0.123314	0.753472	4.0153	0.00109031	0.159296	-1.27463	0.792008	0.668694	-0.123314	3	71349304	F	II	FOXP1	5'UTR	opensea	5'UTR-opensea			TRUE			rs75101977
cg25122369	0.111614	0.536863	4.01336	0.00109464	0.159428	-1.2786	0.571742	0.460128	-0.111614	3	168801790	F	I	MECOM	3'UTR	opensea	3'UTR-opensea			TRUE
cg26952671	0.117074	0.710555	4.00779	0.00110722	0.159931	-1.29002	0.747141	0.630067	-0.117074	X	109243681	F	II		IGR	shelf	IGR-shelf	chrX:109245900-109246673
cg25949033	0.132662	0.831703	4.00675	0.0011096	0.16	-1.29216	0.87316	0.740499	-0.132662	10	3149760	F	I	PFKP	Body	shore	Body-shore	chr10:3148406-3148625	TRUE
cg12635314	0.111389	0.736683	4.00533	0.00111282	0.160136	-1.29506	0.771492	0.660103	-0.111389	10	2815004	R	II		IGR	island	IGR-island	chr10:2815003-2815469
cg10808195	0.105562	0.643994	4.00442	0.0011149	0.160187	-1.29693	0.676982	0.57142	-0.105562	2	60442527	R	I		IGR	opensea	IGR-opensea			TRUE		rs17010888
cg20529655	0.101931	0.610441	4.00205	0.00112034	0.160417	-1.30179	0.642294	0.540363	-0.101931	6	133289633	F	II		IGR	opensea	IGR-opensea			TRUE
cg18085435	0.116779	0.628285	3.99893	0.00112754	0.160627	-1.3082	0.664778	0.547999	-0.116779	18	55400167	R	II	ATP8B1	TSS1500	opensea	TSS1500-opensea
cg16436210	0.12202	0.694817	3.99831	0.00112896	0.160627	-1.30945	0.732949	0.610929	-0.12202	3	16705740	F	I		IGR	opensea	IGR-opensea			TRUE
cg23387597	0.104129	0.808209	3.99266	0.00114213	0.161043	-1.32104	0.840749	0.73662	-0.104129	10	106093778	F	II	ITPRIP	TSS200	shelf	TSS200-shelf	chr10:106097595-106098556
cg22900057	0.109282	0.848411	3.99199	0.0011437	0.161043	-1.32241	0.882561	0.77328	-0.109282	10	134481296	R	I	INPP5A	Body	shelf	Body-shelf	chr10:134477298-134477515		TRUE			rs60717974
cg20977426	0.113143	0.849335	3.99094	0.00114617	0.161043	-1.32457	0.884692	0.771549	-0.113143	1	46921844	F	I		IGR	opensea	IGR-opensea					rs55988810
cg08789970	0.145971	0.523613	3.99079	0.00114652	0.161043	-1.32488	0.569229	0.423258	-0.145971	2	201050370	F	II		IGR	opensea	IGR-opensea			TRUE
cg17514495	0.103334	0.857732	3.99061	0.00114694	0.161043	-1.32525	0.890023	0.78669	-0.103334	1	165415040	R	II	RXRG	TSS1500	opensea	TSS1500-opensea
cg01096199	-0.158253	0.183557	-3.98822	0.00115258	0.161229	-1.33014	0.134103	0.292356	0.158253	14	90191045	F	II		IGR	opensea	IGR-opensea
cg07489132	0.100694	0.66384	3.98771	0.00115378	0.161229	-1.33119	0.695307	0.594613	-0.100694	11	20678833	F	II		IGR	opensea	IGR-opensea			TRUE
cg06300886	0.101718	0.626698	3.98639	0.00115691	0.161229	-1.33389	0.658485	0.556767	-0.101718	17	20811255	F	II		IGR	shore	IGR-shore	chr17:20811748-20812158				rs72838165
cg05239940	0.151745	0.738057	3.98568	0.00115862	0.161229	-1.33537	0.785478	0.633733	-0.151745	10	130935434	R	II		IGR	opensea	IGR-opensea
cg14518346	0.117609	0.757035	3.98505	0.00116011	0.161229	-1.33666	0.793788	0.676179	-0.117609	13	100544910	F	II	CLYBL	3'UTR	shelf	3'UTR-shelf	chr13:100547172-100547431		TRUE
cg18330571	0.111537	0.518594	3.98234	0.00116658	0.161555	-1.34221	0.553449	0.441912	-0.111537	10	131694856	R	II	EBF3	Body	island	Body-island	chr10:131694674-131694933		TRUE
cg06549238	0.114265	0.604	3.98188	0.00116769	0.161555	-1.34316	0.639708	0.525443	-0.114265	11	93277161	F	I	C11orf75	TSS1500	shore	TSS1500-shore	chr11:93275814-93276721					rs77247387
cg25002294	0.112659	0.799841	3.98119	0.00116932	0.161557	-1.34456	0.835047	0.722388	-0.112659	1	228559321	F	II	OBSCN	Body	shore	Body-shore	chr1:228558945-228559246	TRUE
cg02417033	0.13421	0.736342	3.97679	0.00117995	0.162079	-1.3536	0.778283	0.644073	-0.13421	21	37851847	F	II	CLDN14	5'UTR	opensea	5'UTR-opensea			TRUE
cg19317960	0.137721	0.627618	3.97427	0.00118606	0.162346	-1.35875	0.670656	0.532935	-0.137721	4	54452606	F	II	LNX1	5'UTR	opensea	5'UTR-opensea		TRUE	TRUE		rs75046089
cg25598685	0.135697	0.538666	3.97309	0.00118894	0.162587	-1.36118	0.581071	0.445374	-0.135697	11	42617544	F	II		IGR	opensea	IGR-opensea			TRUE
cg18729298	-0.152665	0.282316	-3.97112	0.00119375	0.162605	-1.36521	0.234608	0.387274	0.152665	11	2555203	R	I	KCNQ1	Body	shore	Body-shore	chr11:2555405-2555618		TRUE
cg13403724	0.121331	0.305543	3.96871	0.00119968	0.162783	-1.37016	0.343459	0.222128	-0.121331	19	50931343	R	II	SPIB	Body	island	Body-island	chr19:50931270-50931638	TRUE
cg09988116	0.111934	0.83433	3.96853	0.00120013	0.162783	-1.37053	0.869309	0.757375	-0.111934	1	43750693	R	II	C1orf210	5'UTR	opensea	5'UTR-opensea			TRUE
cg12117658	-0.10418	0.0911825	-3.9672	0.00120341	0.162862	-1.37326	0.0586261	0.162806	0.10418	17	56406294	R	II	BZRAP1	TSS200	shelf	TSS200-shelf	chr17:56401728-56402343	TRUE		low-CpG:53761293-53761299
cg21285555	0.102641	0.645051	3.96665	0.00120476	0.162892	-1.37438	0.677126	0.574486	-0.102641	8	52771466	R	II	PCMTD1	Body	opensea	Body-opensea			TRUE
cg04864807	-0.193992	0.41537	-3.96583	0.00120679	0.162919	-1.37606	0.354747	0.548739	0.193992	2	121412139	R	I		IGR	island	IGR-island	chr2:121411983-121412315		TRUE
cg11058916	-0.110527	0.722883	-3.9654	0.00120785	0.162919	-1.37694	0.688343	0.79887	0.110527	16	34257749	F	II		IGR	island	IGR-island	chr16:34256748-34257750
cg10596412	0.101101	0.298465	3.96525	0.00120822	0.162919	-1.37725	0.330059	0.228959	-0.101101	6	45682477	F	II		IGR	opensea	IGR-opensea		TRUE	TRUE
cg13493043	0.127497	0.860137	3.96517	0.00120845	0.162919	-1.37743	0.89998	0.772483	-0.127497	12	127547987	R	II		IGR	opensea	IGR-opensea
cg14155193	0.121525	0.844918	3.96056	0.00121992	0.163315	-1.38687	0.882895	0.761369	-0.121525	9	129148742	F	II	FAM125B	Body	opensea	Body-opensea			TRUE
cg19042497	0.104042	0.740601	3.95764	0.00122726	0.163515	-1.39286	0.773114	0.669071	-0.104042	18	47723894	R	II		IGR	shelf	IGR-shelf	chr18:47719866-47721742
cg06097077	0.117445	0.769542	3.95758	0.00122742	0.163515	-1.39299	0.806243	0.688798	-0.117445	3	173920226	R	II	NLGN1	Body	opensea	Body-opensea			TRUE
cg13724238	0.130436	0.773283	3.95698	0.00122892	0.163515	-1.39421	0.814044	0.683608	-0.130436	11	2871992	R	II		IGR	shore	IGR-shore	chr11:2871364-2871940
cg00030005	0.102781	0.64498	3.95606	0.00123126	0.163515	-1.39611	0.677099	0.574318	-0.102781	7	155129409	F	II		IGR	shore	IGR-shore	chr7:155130499-155131042
cg02109605	0.121075	0.630209	3.95573	0.00123209	0.163515	-1.39678	0.668045	0.54697	-0.121075	3	13028573	F	II	IQSEC1	Body	opensea	Body-opensea			TRUE
cg24900164	0.116825	0.701107	3.95549	0.00123269	0.163515	-1.39727	0.737615	0.62079	-0.116825	8	8563747	F	II		IGR	shelf	IGR-shelf	chr8:8559131-8560867					rs13254997
cg12684052	-0.11462	0.681751	-3.95264	0.00123992	0.163515	-1.40311	0.645933	0.760552	0.11462	17	19883602	F	I		IGR	island	IGR-island	chr17:19883325-19883610
cg13014457	0.11179	0.83654	3.95165	0.00124247	0.163515	-1.40516	0.871474	0.759684	-0.11179	11	115333041	F	II	CADM1	Body	opensea	Body-opensea			TRUE
cg17159743	0.111488	0.648641	3.9514	0.0012431	0.163515	-1.40566	0.683481	0.571993	-0.111488	7	1315297	R	II		IGR	island	IGR-island	chr7:1315050-1315947	TRUE
cg13447566	0.133103	0.585988	3.95127	0.00124342	0.163515	-1.40592	0.627583	0.49448	-0.133103	9	133801544	F	I	FIBCD1	Body	shelf	Body-shelf	chr9:133805004-133805453	TRUE			rs58805851
cg04552625	0.124759	0.562572	3.94963	0.00124762	0.163515	-1.40929	0.601559	0.4768	-0.124759	8	877074	R	I		IGR	opensea	IGR-opensea
cg02346737	0.101149	0.766933	3.94949	0.00124798	0.163515	-1.40958	0.798542	0.697392	-0.101149	5	142490096	F	II	ARHGAP26	Body	opensea	Body-opensea			TRUE		rs34197001
cg18086520	0.11526	0.830197	3.94909	0.001249	0.163515	-1.4104	0.866216	0.750956	-0.11526	4	186741362	R	II	SORBS2	5'UTR	opensea	5'UTR-opensea			TRUE
cg18958693	0.145341	0.840081	3.94835	0.00125091	0.163587	-1.41192	0.8855	0.740158	-0.145341	7	1607601	F	II	PSMG3	Body	shore	Body-shore	chr7:1609568-1610037	TRUE	TRUE		rs62436871
cg05091736	0.108852	0.588316	3.94784	0.00125223	0.163587	-1.41298	0.622332	0.51348	-0.108852	17	14942129	F	II		IGR	opensea	IGR-opensea			TRUE
cg21150843	0.112607	0.593076	3.94733	0.00125353	0.163587	-1.41401	0.628266	0.515659	-0.112607	4	153641409	R	I		IGR	opensea	IGR-opensea			TRUE
cg14315054	0.110457	0.7467	3.94555	0.00125814	0.163587	-1.41767	0.781218	0.67076	-0.110457	1	221068730	R	II		IGR	shore	IGR-shore	chr1:221068782-221069159
cg22976366	0.112826	0.700031	3.9453	0.00125876	0.163587	-1.41817	0.73529	0.622464	-0.112826	17	30608367	F	II	RHBDL3	Body	opensea	Body-opensea			TRUE
cg05083202	0.12341	0.648368	3.945	0.00125956	0.163587	-1.4188	0.686933	0.563523	-0.12341	21	40146149	R	II	NCRNA00114	TSS1500	opensea	TSS1500-opensea			TRUE
cg22546374	-0.123327	0.147142	-3.94493	0.00125972	0.163587	-1.41893	0.108602	0.23193	0.123327	6	27301172	F	II		IGR	opensea	IGR-opensea
cg11775488	-0.169548	0.169521	-3.94487	0.00125989	0.163587	-1.41906	0.116537	0.286085	0.169548	10	95586237	F	II		IGR	opensea	IGR-opensea			TRUE
cg17953716	0.106583	0.348154	3.94399	0.00126216	0.163723	-1.42086	0.381462	0.274878	-0.106583	8	1915004	R	I		IGR	opensea	IGR-opensea					rs73184714
cg20191066	-0.108623	0.19706	-3.94326	0.00126406	0.163733	-1.42236	0.163116	0.271739	0.108623	17	56413977	R	II		IGR	opensea	IGR-opensea		TRUE
cg27104778	0.116103	0.857761	3.94322	0.00126415	0.163733	-1.42243	0.894044	0.77794	-0.116103	2	237542706	R	I		IGR	opensea	IGR-opensea
cg03399655	0.108028	0.828069	3.94153	0.00126855	0.16385	-1.4259	0.861828	0.7538	-0.108028	3	112541437	R	II	CD200R1L	Body	opensea	Body-opensea			TRUE
cg18237739	0.140305	0.672117	3.94069	0.00127076	0.16385	-1.42764	0.715962	0.575657	-0.140305	10	63167726	F	II	TMEM26	3'UTR	opensea	3'UTR-opensea			TRUE
cg07585069	-0.149593	0.205934	-3.93986	0.00127292	0.16385	-1.42934	0.159186	0.308779	0.149593	17	27039120	F	I	PROCA1	TSS1500	shore	TSS1500-shore	chr17:27038084-27038919		TRUE
cg15023858	0.115666	0.674987	3.93969	0.00127337	0.16385	-1.42969	0.711133	0.595467	-0.115666	3	69812434	F	I	MITF	TSS1500	opensea	TSS1500-opensea
cg12501220	0.11508	0.760997	3.93929	0.00127442	0.163885	-1.43051	0.79696	0.68188	-0.11508	21	45972595	R	II	KRTAP10-2	TSS1500	opensea	TSS1500-opensea
cg02997061	-0.112191	0.192044	-3.93877	0.00127576	0.163995	-1.43156	0.156984	0.269175	0.112191	X	40126573	R	I		IGR	island	IGR-island	chrX:40126360-40126744		TRUE
cg21881330	0.104052	0.799734	3.93866	0.00127605	0.163995	-1.43179	0.83225	0.728198	-0.104052	14	92938068	R	II	SLC24A4	Body	opensea	Body-opensea			TRUE
cg09874213	-0.145614	0.158337	-3.9381	0.00127755	0.164136	-1.43296	0.112833	0.258447	0.145614	1	24968352	F	II	SRRM1	TSS1500	shore	TSS1500-shore	chr1:24969027-24970196
cg14509245	0.123105	0.680588	3.93516	0.00128528	0.164588	-1.43898	0.719058	0.595953	-0.123105	14	32812270	F	II	AKAP6	5'UTR	opensea	5'UTR-opensea			TRUE		rs10139567
cg25191041	-0.12413	0.262481	-3.93286	0.00129138	0.165006	-1.4437	0.22369	0.34782	0.12413	21	44782470	F	I		IGR	island	IGR-island	chr21:44782248-44782601	TRUE	TRUE
cg21114334	-0.147674	0.258325	-3.93073	0.00129703	0.165334	-1.44806	0.212177	0.35985	0.147674	6	29720137	F	II	IFITM4P	TSS1500	shore	TSS1500-shore	chr6:29720381-29721101				rs1610737
cg17125837	0.133907	0.361173	3.9279	0.00130459	0.165738	-1.45386	0.403019	0.269112	-0.133907	11	358595	F	I		IGR	shelf	IGR-shelf	chr11:355947-356447
cg27278470	0.128256	0.724323	3.92715	0.00130662	0.165946	-1.45542	0.764403	0.636147	-0.128256	12	52540778	R	II		IGR	opensea	IGR-opensea		TRUE	TRUE
cg23670203	0.102707	0.874048	3.92555	0.00131091	0.16619	-1.45868	0.906143	0.803437	-0.102707	6	36515856	F	II	STK38	TSS1500	shore	TSS1500-shore	chr6:36514995-36515308
cg19129687	0.148758	0.740193	3.92087	0.0013236	0.166694	-1.4683	0.78668	0.637922	-0.148758	13	114056123	F	I		IGR	island	IGR-island	chr13:114056100-114056577				rs77644805
cg18086868	0.113248	0.352947	3.91857	0.00132985	0.166803	-1.473	0.388337	0.275089	-0.113248	1	220463627	F	II		IGR	opensea	IGR-opensea			TRUE
cg02568479	0.140569	0.720805	3.91793	0.0013316	0.166803	-1.47432	0.764733	0.624163	-0.140569	1	95141800	F	II		IGR	opensea	IGR-opensea			TRUE
cg07209987	0.141054	0.779408	3.91665	0.00133512	0.16688	-1.47695	0.823487	0.682433	-0.141054	1	10221203	F	I	UBE4B	Body	opensea	Body-opensea			TRUE
cg00631329	-0.162648	0.175053	-3.91641	0.00133578	0.16688	-1.47745	0.124225	0.286874	0.162648	6	26305371	F	II		IGR	opensea	IGR-opensea					rs994379
cg10372829	0.11134	0.614839	3.91622	0.00133631	0.16688	-1.47784	0.649633	0.538293	-0.11134	13	20751257	R	II		IGR	island	IGR-island	chr13:20751256-20751946
cg20456218	0.157489	0.653928	3.91569	0.00133777	0.166901	-1.47893	0.703143	0.545654	-0.157489	5	156273969	F	II		IGR	shelf	IGR-shelf	chr5:156277302-156277685
cg16368147	0.100589	0.398671	3.91279	0.00134576	0.167353	-1.48487	0.430105	0.329516	-0.100589	4	62111221	R	II		IGR	opensea	IGR-opensea			TRUE			rs35391603
cg13093338	0.142033	0.747394	3.91266	0.00134613	0.167353	-1.48514	0.79178	0.649746	-0.142033	1	192899280	F	II		IGR	opensea	IGR-opensea			TRUE
cg06098368	-0.181785	0.210047	-3.91244	0.00134673	0.167353	-1.48559	0.153239	0.335024	0.181785	7	63386616	F	I		IGR	island	IGR-island	chr7:63386608-63386885	TRUE
cg13797425	-0.130933	0.232909	-3.91122	0.00135012	0.167413	-1.48809	0.191992	0.322925	0.130933	14	102554977	R	I	HSP90AA1	TSS1500	shore	TSS1500-shore	chr14:102552721-102554068
cg06171329	0.135247	0.73128	3.91112	0.0013504	0.167413	-1.4883	0.773545	0.638297	-0.135247	8	97389586	R	II		IGR	opensea	IGR-opensea			TRUE
cg11342437	0.103484	0.69256	3.91035	0.00135252	0.167478	-1.48987	0.724899	0.621415	-0.103484	13	47126328	F	II	LRCH1	TSS1500	shore	TSS1500-shore	chr13:47126970-47128706
cg27519622	-0.147063	0.249131	-3.90935	0.00135532	0.167608	-1.49193	0.203174	0.350237	0.147063	16	3079877	F	I	CCDC64B	Body	island	Body-island	chr16:3079536-3079954	TRUE	TRUE
cg08376014	0.134223	0.667757	3.90704	0.00136176	0.167767	-1.49666	0.709702	0.575479	-0.134223	4	79582887	F	II		IGR	opensea	IGR-opensea			TRUE
cg14866032	0.133621	0.470599	3.90524	0.00136682	0.167767	-1.50036	0.512356	0.378735	-0.133621	15	98195808	F	I		IGR	shore	IGR-shore	chr15:98196021-98196391				rs4965091
cg25497487	0.112079	0.829054	3.90425	0.00136961	0.167767	-1.50239	0.864079	0.752	-0.112079	22	25615355	F	I	CRYBB2	TSS1500	opensea	TSS1500-opensea
cg25607216	0.121096	0.600879	3.90346	0.00137182	0.167767	-1.50401	0.638722	0.517626	-0.121096	11	126976228	R	II		IGR	opensea	IGR-opensea			TRUE			rs74783011
cg06574757	0.132682	0.592213	3.89943	0.00138323	0.168368	-1.51227	0.633676	0.500994	-0.132682	3	160588268	R	II	PPM1L	Body	opensea	Body-opensea			TRUE
cg13772515	-0.126383	0.634537	-3.89763	0.00138839	0.168507	-1.51598	0.595043	0.721426	0.126383	2	115409517	F	II	DPP10	Body	opensea	Body-opensea			TRUE
cg12493906	0.135225	0.731469	3.89681	0.00139071	0.168582	-1.51764	0.773727	0.638502	-0.135225	11	5009311	F	II	MMP26	TSS200	opensea	TSS200-opensea
cg21441360	0.126378	0.785724	3.89662	0.00139126	0.168582	-1.51804	0.825217	0.698839	-0.126378	13	106426066	R	II		IGR	opensea	IGR-opensea			TRUE
cg17533575	0.152844	0.599054	3.89654	0.00139148	0.168582	-1.5182	0.646818	0.493974	-0.152844	8	39791430	F	II	IDO2	TSS1500	opensea	TSS1500-opensea
cg13295660	0.112687	0.734598	3.89551	0.00139445	0.168699	-1.52032	0.769812	0.657125	-0.112687	2	225331381	F	II		IGR	opensea	IGR-opensea			TRUE
cg21151061	0.105494	0.543627	3.89405	0.00139863	0.168708	-1.52331	0.576594	0.4711	-0.105494	12	50498016	R	II	GPD1	Body	opensea	Body-opensea		TRUE	TRUE
cg19202813	0.138204	0.596688	3.8937	0.00139965	0.168708	-1.52404	0.639877	0.501673	-0.138204	2	189216616	F	II	GULP1	5'UTR	opensea	5'UTR-opensea			TRUE
cg04193820	0.102618	0.271898	3.89268	0.0014026	0.168708	-1.52614	0.303966	0.201348	-0.102618	17	29297414	F	II	RNF135	TSS1500	shore	TSS1500-shore	chr17:29298046-29298606			low-CpG:26321506-26321705	rs7221238
cg00983904	-0.174157	0.215966	-3.89248	0.00140317	0.168708	-1.52654	0.161542	0.335699	0.174157	12	6665288	R	I	IFFO1	TSS200	island	TSS200-island	chr12:6664425-6665336			high-CpG:6535366-6535558
cg12720965	0.122641	0.707872	3.89175	0.00140526	0.168708	-1.52803	0.746197	0.623556	-0.122641	1	245397981	F	II	KIF26B	Body	opensea	Body-opensea			TRUE			rs80304373
cg05861512	-0.127713	0.38378	-3.89006	0.00141017	0.168998	-1.53151	0.34387	0.471583	0.127713	14	94442960	R	II		IGR	opensea	IGR-opensea				low-CpG:93512658-93512840
cg02902637	0.101382	0.690495	3.88793	0.00141635	0.169076	-1.53587	0.722177	0.620795	-0.101382	1	37773903	R	II		IGR	opensea	IGR-opensea
cg06884352	0.12454	0.584194	3.88773	0.00141695	0.169076	-1.53629	0.623113	0.498573	-0.12454	8	122808923	R	II		IGR	opensea	IGR-opensea			TRUE
cg15021238	0.13595	0.683135	3.8859	0.00142228	0.169262	-1.54003	0.72562	0.589669	-0.13595	2	173305865	R	II	ITGA6	Body	opensea	Body-opensea			TRUE
cg14072016	0.161488	0.712439	3.88558	0.00142321	0.169262	-1.54069	0.762904	0.601416	-0.161488	10	384652	F	I	DIP2C	Body	shelf	Body-shelf	chr10:387294-387544	TRUE
cg19743270	0.123708	0.860074	3.8849	0.00142522	0.169262	-1.54209	0.898733	0.775025	-0.123708	X	2746333	R	II	GYG2	TSS1500	shore	TSS1500-shore	chrX:2746553-2748235
cg25587069	-0.134404	0.172546	-3.8848	0.00142551	0.169262	-1.54229	0.130544	0.264948	0.134404	5	151066484	R	I	SPARC	1stExon	opensea	1stExon-opensea		TRUE		low-CpG:151046661-151046731
cg04806150	0.121169	0.724684	3.88455	0.00142624	0.169262	-1.5428	0.76255	0.641381	-0.121169	13	112292610	R	I		IGR	opensea	IGR-opensea
cg22695986	-0.273305	0.282206	-3.88277	0.00143147	0.169431	-1.54645	0.196798	0.470103	0.273305	7	63386815	F	II		IGR	island	IGR-island	chr7:63386608-63386885	TRUE
cg24401026	0.105037	0.57705	3.8827	0.0014317	0.169431	-1.54661	0.609874	0.504838	-0.105037	6	136732287	F	II	MAP7	Body	opensea	Body-opensea			TRUE
cg03324464	0.114415	0.520535	3.88142	0.00143547	0.169567	-1.54924	0.55629	0.441875	-0.114415	1	116022091	R	II		IGR	opensea	IGR-opensea						rs35108719
cg14918650	0.11851	0.702203	3.88072	0.00143753	0.169572	-1.55067	0.739237	0.620727	-0.11851	7	94033643	R	II	COL1A2	Body	opensea	Body-opensea			TRUE
cg24643158	0.11825	0.760337	3.87846	0.00144423	0.169805	-1.55531	0.79729	0.67904	-0.11825	11	45001657	R	II		IGR	opensea	IGR-opensea		TRUE	TRUE
cg11572381	0.112575	0.602778	3.87822	0.00144495	0.169805	-1.5558	0.637957	0.525383	-0.112575	19	10827337	R	I	DNM2	TSS1500	shore	TSS1500-shore	chr19:10828657-10829340
cg23687466	0.107304	0.448006	3.87554	0.00145293	0.169943	-1.56129	0.481539	0.374235	-0.107304	11	504937	R	I	RNH1	5'UTR	shore	5'UTR-shore	chr11:506353-508009	TRUE		low-CpG:494911-494939		rs34786172
cg14467654	0.110538	0.880556	3.87504	0.00145442	0.169943	-1.56231	0.915099	0.804561	-0.110538	9	131155819	R	II	MIR219-2	TSS1500	island	TSS1500-island	chr9:131154346-131155923
cg27631199	0.123097	0.717339	3.87483	0.00145507	0.169943	-1.56276	0.755807	0.63271	-0.123097	1	66376337	F	II	PDE4B	5'UTR	opensea	5'UTR-opensea			TRUE
cg02502704	0.121891	0.614725	3.87448	0.00145612	0.169943	-1.56348	0.652816	0.530925	-0.121891	10	35413605	F	II		IGR	shelf	IGR-shelf	chr10:35415788-35416685
cg11345955	0.106174	0.826228	3.8741	0.00145725	0.169943	-1.56425	0.859407	0.753233	-0.106174	15	86086674	F	II	AKAP13	Body	opensea	Body-opensea			TRUE
cg19718306	0.177843	0.813017	3.87383	0.00145807	0.169943	-1.56481	0.868592	0.69075	-0.177843	3	134371507	F	II		IGR	shore	IGR-shore	chr3:134369464-134370242	TRUE				rs35062895
cg03851970	0.10421	0.806971	3.87343	0.00145925	0.169943	-1.56562	0.839537	0.735327	-0.10421	3	69932052	R	II	MITF	Body	opensea	Body-opensea			TRUE
cg18501230	0.101416	0.632789	3.87169	0.0014645	0.170001	-1.5692	0.664482	0.563065	-0.101416	8	1338706	R	II		IGR	shelf	IGR-shelf	chr8:1341220-1342166
cg06119630	0.106279	0.72677	3.87031	0.00146865	0.170001	-1.57202	0.759982	0.653703	-0.106279	10	130269030	R	II		IGR	opensea	IGR-opensea
cg16824643	0.107452	0.541267	3.86846	0.00147426	0.170209	-1.57582	0.574845	0.467394	-0.107452	18	76462312	F	I		IGR	shore	IGR-shore	chr18:76463363-76463678		TRUE
cg09503045	-0.134841	0.194777	-3.86759	0.00147692	0.17021	-1.57762	0.152639	0.28748	0.134841	19	55592453	R	II	EPS8L1	Body	island	Body-island	chr19:55591905-55593980		TRUE
cg14140118	0.133014	0.521806	3.86593	0.00148196	0.170278	-1.58101	0.563372	0.430359	-0.133014	11	108423031	F	II	EXPH5	TSS200	opensea	TSS200-opensea
cg08544453	0.10097	0.80057	3.86396	0.00148797	0.170778	-1.58505	0.832123	0.731153	-0.10097	1	11361900	R	II		IGR	opensea	IGR-opensea
cg21679730	0.120919	0.716254	3.86297	0.00149103	0.170778	-1.58709	0.754041	0.633122	-0.120919	1	65047485	R	II	CACHD1	Body	opensea	Body-opensea			TRUE
cg00007426	0.109547	0.843705	3.86264	0.00149204	0.170778	-1.58777	0.877938	0.768392	-0.109547	2	240404782	R	II		IGR	opensea	IGR-opensea
cg11508714	-0.170864	0.225916	-3.85951	0.00150166	0.171214	-1.59418	0.172521	0.343385	0.170864	2	238343757	R	II		IGR	opensea	IGR-opensea
cg26078436	0.113275	0.732439	3.85896	0.00150337	0.171229	-1.59531	0.767837	0.654562	-0.113275	11	5265992	F	II	HBBP1	TSS1500	opensea	TSS1500-opensea
cg18862210	0.133602	0.67202	3.85856	0.00150462	0.171229	-1.59614	0.713771	0.580169	-0.133602	6	168815477	F	II		IGR	shore	IGR-shore	chr6:168813677-168814042
cg03381604	0.10557	0.746418	3.85587	0.00151296	0.171309	-1.60165	0.779409	0.673839	-0.10557	8	99180740	R	I		IGR	opensea	IGR-opensea			TRUE
cg16036046	0.14691	0.632032	3.85514	0.00151526	0.171309	-1.60316	0.677941	0.531031	-0.14691	18	40696164	F	II	RIT2	TSS1500	opensea	TSS1500-opensea
cg01512719	0.117247	0.840797	3.85458	0.001517	0.171309	-1.60431	0.877436	0.760189	-0.117247	13	49879770	R	I		IGR	opensea	IGR-opensea
cg25710140	0.103776	0.608057	3.85417	0.00151828	0.171309	-1.60515	0.640487	0.536711	-0.103776	X	10852037	F	II	MID1	TSS1500	opensea	TSS1500-opensea			TRUE
cg00898480	0.100167	0.829776	3.85362	0.00152001	0.171309	-1.60628	0.861078	0.760912	-0.100167	17	74641275	F	II	ST6GALNAC1	TSS1500	opensea	TSS1500-opensea					rs58643933	rs76864539
cg07596645	0.119165	0.728739	3.85332	0.00152094	0.171309	-1.60689	0.765978	0.646813	-0.119165	1	201347917	R	II	TNNT2	TSS1500	opensea	TSS1500-opensea			TRUE
cg24971112	0.114073	0.729829	3.85244	0.00152369	0.171309	-1.60869	0.765477	0.651404	-0.114073	3	153385052	F	II		IGR	opensea	IGR-opensea			TRUE
cg05651820	0.129799	0.619107	3.84827	0.00153684	0.171662	-1.61725	0.659669	0.529871	-0.129799	3	122764562	F	I		IGR	opensea	IGR-opensea			TRUE
cg12981595	0.120698	0.520728	3.84749	0.00153929	0.171844	-1.61884	0.558446	0.437748	-0.120698	17	39254427	R	II	KRTAP4-8	TSS200	opensea	TSS200-opensea
cg02955804	-0.108059	0.549238	-3.84668	0.00154186	0.171965	-1.6205	0.51547	0.623529	0.108059	16	33943412	F	II		IGR	shore	IGR-shore	chr16:33942605-33942876	TRUE			rs76748338
cg26814883	-0.102303	0.61893	-3.8458	0.00154469	0.172009	-1.62233	0.58696	0.689263	0.102303	X	70328127	R	II	CXorf65	TSS1500	opensea	TSS1500-opensea
cg12448977	0.152578	0.680422	3.8456	0.0015453	0.172009	-1.62272	0.728102	0.575524	-0.152578	2	184531153	F	II		IGR	opensea	IGR-opensea			TRUE
cg15115171	0.131535	0.51499	3.84176	0.00155758	0.172422	-1.63061	0.556094	0.42456	-0.131535	10	17604829	F	II		IGR	opensea	IGR-opensea			TRUE
cg11085282	0.145724	0.831644	3.83999	0.00156325	0.172608	-1.63423	0.877182	0.731458	-0.145724	22	46262203	R	II		IGR	island	IGR-island	chr22:46262065-46263747		TRUE
cg27633342	0.11506	0.617056	3.83887	0.00156688	0.172724	-1.63654	0.653012	0.537952	-0.11506	15	52588279	R	II	MYO5C	TSS1500	shore	TSS1500-shore	chr15:52587353-52588172	TRUE
cg21747310	0.137556	0.570354	3.83684	0.00157343	0.172727	-1.64069	0.61334	0.475785	-0.137556	12	11709115	R	II		IGR	opensea	IGR-opensea			TRUE
cg18251187	0.130334	0.661781	3.83636	0.00157501	0.172727	-1.64169	0.70251	0.572176	-0.130334	5	136984731	F	II	MIR874	TSS1500	opensea	TSS1500-opensea					rs80072977
cg05454501	-0.17171	0.265969	-3.83583	0.00157673	0.172727	-1.64278	0.21231	0.384019	0.17171	5	76373391	F	I	ZBED3	Body	island	Body-island	chr5:76372882-76373720	TRUE
cg06817669	0.166081	0.66628	3.83552	0.00157771	0.172727	-1.6434	0.71818	0.552099	-0.166081	15	77518882	R	II	C15orf5	TSS1500	opensea	TSS1500-opensea
cg24853868	0.151291	0.550956	3.83507	0.00157918	0.172727	-1.64433	0.598234	0.446944	-0.151291	1	146555624	F	II		IGR	shore	IGR-shore	chr1:146556312-146556676				rs56257393
cg23069297	0.149063	0.703151	3.83491	0.00157971	0.172727	-1.64466	0.749733	0.60067	-0.149063	2	242833648	F	I		IGR	shore	IGR-shore	chr2:242832999-242833229		TRUE		rs75337008
cg24157892	0.106417	0.185278	3.83468	0.00158045	0.172727	-1.64513	0.218534	0.112116	-0.106417	17	59473707	F	I		IGR	island	IGR-island	chr17:59473060-59483266
cg00931644	0.122797	0.416713	3.8343	0.00158169	0.17277	-1.64591	0.455087	0.33229	-0.122797	13	77461368	F	I	KCTD12	TSS1500	shore	TSS1500-shore	chr13:77459322-77461099
cg18994438	0.10197	0.785833	3.83343	0.00158454	0.17277	-1.64771	0.817698	0.715728	-0.10197	17	43318045	F	II	FMNL1	Body	shore	Body-shore	chr17:43318429-43319243	TRUE	TRUE			rs35152365
cg26955383	-0.123198	0.53709	-3.83289	0.00158628	0.172854	-1.6488	0.498591	0.621789	0.123198	10	105218660	R	II	CALHM1	TSS200	shore	TSS200-shore	chr10:105217966-105218287	TRUE	TRUE
cg08470157	-0.134708	0.240185	-3.83275	0.00158675	0.172854	-1.64909	0.198089	0.332797	0.134708	X	30671302	F	I	GK	TSS200	island	TSS200-island	chrX:30670739-30671869
cg21584222	0.106209	0.784183	3.83256	0.00158737	0.172854	-1.64948	0.817373	0.711165	-0.106209	12	3414258	F	II		IGR	opensea	IGR-opensea
cg08679238	-0.108455	0.0767836	-3.83224	0.00158841	0.172856	-1.65013	0.0428913	0.151347	0.108455	3	46449100	F	II	CCRL2	1stExon	opensea	1stExon-opensea			TRUE
cg25152404	0.101809	0.576625	3.83198	0.00158927	0.172856	-1.65067	0.60844	0.506631	-0.101809	1	225999183	F	II	EPHX1	5'UTR	shore	5'UTR-shore	chr1:225997646-225998233		TRUE
cg27369096	0.106596	0.717768	3.83141	0.00159115	0.172916	-1.65185	0.75108	0.644484	-0.106596	5	2169769	F	I		IGR	opensea	IGR-opensea
cg11109845	-0.207327	0.222582	-3.83122	0.00159177	0.172916	-1.65224	0.157792	0.365119	0.207327	7	148394888	R	II	CUL1	TSS1500	shore	TSS1500-shore	chr7:148395430-148397002
cg07077965	-0.130514	0.334293	-3.83073	0.00159338	0.172916	-1.65325	0.293508	0.424021	0.130514	2	177503592	R	II		IGR	shore	IGR-shore	chr2:177502240-177502910
cg19149264	0.103147	0.517912	3.83031	0.00159474	0.172916	-1.65409	0.550146	0.446999	-0.103147	3	187571176	R	I		IGR	opensea	IGR-opensea			TRUE			rs13083553
cg22272070	0.118731	0.736196	3.83029	0.00159482	0.172916	-1.65415	0.773299	0.654569	-0.118731	18	76473925	F	II		IGR	opensea	IGR-opensea						rs79562398
cg06308084	0.112524	0.752498	3.82628	0.00160803	0.173353	-1.66236	0.787662	0.675138	-0.112524	22	50493570	F	II	TTLL8	TSS1500	shelf	TSS1500-shelf	chr22:50496441-50497393					rs13058258
cg27583740	0.120928	0.634251	3.82621	0.00160827	0.173353	-1.66251	0.672042	0.551113	-0.120928	7	123556406	R	II		IGR	opensea	IGR-opensea			TRUE
cg11787508	-0.141841	0.713832	-3.8254	0.00161097	0.173353	-1.66418	0.669506	0.811347	0.141841	13	26761337	R	II		IGR	shore	IGR-shore	chr13:26760421-26760892
cg15698691	0.105224	0.56303	3.82481	0.00161293	0.173353	-1.66539	0.595912	0.490689	-0.105224	7	18079924	R	II		IGR	opensea	IGR-opensea			TRUE
cg03099144	0.130537	0.667868	3.8234	0.00161762	0.173353	-1.66828	0.708661	0.578124	-0.130537	6	125323425	F	II	RNF217	5'UTR	opensea	5'UTR-opensea			TRUE
cg17342973	-0.151266	0.288189	-3.82312	0.00161856	0.173353	-1.66886	0.240918	0.392184	0.151266	3	184301239	R	I		IGR	island	IGR-island	chr3:184301117-184302134	TRUE
cg11644585	0.159155	0.796842	3.82188	0.00162269	0.173353	-1.6714	0.846578	0.687422	-0.159155	17	8958019	R	I	NTN1	Body	opensea	Body-opensea			TRUE
cg17600918	0.112315	0.686806	3.82182	0.00162288	0.173353	-1.67151	0.721904	0.609589	-0.112315	6	154809230	R	II	CNKSR3	Body	opensea	Body-opensea			TRUE
cg24136671	0.128889	0.685664	3.82118	0.00162502	0.173353	-1.67283	0.725942	0.597053	-0.128889	14	104834425	R	II		IGR	opensea	IGR-opensea			TRUE			rs74088576
cg05029822	-0.326884	0.25277	-3.82027	0.00162807	0.173353	-1.6747	0.150619	0.477503	0.326884	11	2891118	R	I	KCNQ1DN	TSS200	island	TSS200-island	chr11:2890388-2891337
cg06770163	0.103778	0.189126	3.81992	0.00162925	0.173353	-1.67542	0.221557	0.117779	-0.103778	14	102094618	R	II		IGR	shore	IGR-shore	chr14:102094854-102095204
cg13061124	0.135605	0.597008	3.8194	0.00163099	0.173353	-1.67648	0.639385	0.50378	-0.135605	8	58903894	F	II		IGR	shelf	IGR-shelf	chr8:58907001-58907822
cg17838697	0.114409	0.457187	3.81756	0.00163719	0.173353	-1.68026	0.49294	0.378531	-0.114409	17	63624567	F	II		IGR	opensea	IGR-opensea			TRUE		rs8081284
cg14535980	-0.155332	0.236438	-3.81746	0.00163753	0.173353	-1.68047	0.187897	0.343229	0.155332	2	106681937	F	I	C2orf40	TSS200	shore	TSS200-shore	chr2:106681982-106682403		TRUE
cg10115368	0.127458	0.573744	3.81683	0.00163964	0.173353	-1.68175	0.613575	0.486117	-0.127458	14	100435663	R	II		IGR	shore	IGR-shore	chr14:100437381-100438863		TRUE
cg10627429	0.117127	0.833883	3.8166	0.00164045	0.173366	-1.68224	0.870485	0.753358	-0.117127	10	115511135	F	II	C10orf81	TSS200	opensea	TSS200-opensea
cg15870857	0.110974	0.532531	3.81469	0.00164689	0.173398	-1.68614	0.567211	0.456236	-0.110974	14	104742172	R	II		IGR	opensea	IGR-opensea						rs55822034
cg08217163	-0.107916	0.188442	-3.81456	0.00164734	0.173398	-1.68641	0.154719	0.262634	0.107916	2	66809959	R	I		IGR	shore	IGR-shore	chr2:66808568-66809404		TRUE
cg02632952	0.119655	0.445875	3.81432	0.00164816	0.173398	-1.68691	0.483267	0.363612	-0.119655	3	190426524	F	II		IGR	opensea	IGR-opensea			TRUE
cg19296305	0.119918	0.689066	3.81384	0.00164979	0.173398	-1.68789	0.72654	0.606622	-0.119918	4	109030040	R	II	LEF1	Body	opensea	Body-opensea			TRUE			rs72660420
cg07458272	0.127526	0.825574	3.81293	0.0016529	0.173398	-1.68977	0.865426	0.737899	-0.127526	19	34744396	R	II	KIAA0355	TSS1500	shore	TSS1500-shore	chr19:34745218-34746204
cg20227530	0.108352	0.762511	3.81228	0.00165509	0.173398	-1.69109	0.796371	0.688019	-0.108352	10	79085138	R	II	KCNMA1	Body	opensea	Body-opensea			TRUE
cg09106231	0.120721	0.423921	3.80907	0.00166608	0.173648	-1.69767	0.461646	0.340925	-0.120721	1	207455715	R	II		IGR	opensea	IGR-opensea			TRUE
cg24935135	0.11689	0.593167	3.80855	0.00166788	0.173709	-1.69875	0.629695	0.512804	-0.11689	2	62900312	F	I	EHBP1	TSS1500	opensea	TSS1500-opensea			TRUE		rs62177746
cg26717763	0.108362	0.61414	3.80773	0.0016707	0.173723	-1.70043	0.648003	0.539641	-0.108362	6	28832567	F	I		IGR	shore	IGR-shore	chr6:28831682-28832134
cg17634572	0.122103	0.691727	3.80601	0.00167661	0.173723	-1.70395	0.729884	0.607781	-0.122103	8	20146604	R	II		IGR	opensea	IGR-opensea			TRUE
cg27212428	0.100594	0.682423	3.80539	0.00167876	0.173723	-1.70522	0.713858	0.613264	-0.100594	4	22031559	F	II		IGR	opensea	IGR-opensea			TRUE
cg07500347	0.142	0.52712	3.80352	0.00168525	0.173797	-1.70906	0.571495	0.429495	-0.142	16	875881	R	I		IGR	shore	IGR-shore	chr16:874280-874895
cg00905220	0.12217	0.859214	3.80227	0.00168959	0.173886	-1.71162	0.897392	0.775222	-0.12217	17	982154	F	II	ABR	Body	shore	Body-shore	chr17:981508-981748		TRUE
cg07333715	-0.140727	0.402342	-3.80182	0.00169117	0.173966	-1.71255	0.358364	0.499092	0.140727	11	2292691	F	I	ASCL2	TSS1500	island	TSS1500-island	chr11:2290104-2292932				rs7924540
cg03417788	0.104918	0.661844	3.80051	0.00169574	0.174139	-1.71524	0.694631	0.589714	-0.104918	3	14605870	F	I		IGR	opensea	IGR-opensea			TRUE
cg25446890	0.118304	0.659495	3.79922	0.00170025	0.174173	-1.71788	0.696465	0.578161	-0.118304	7	124319401	R	II		IGR	opensea	IGR-opensea			TRUE
cg20010506	-0.149027	0.168601	-3.798	0.00170455	0.174173	-1.72039	0.12203	0.271057	0.149027	12	62585467	F	II	FAM19A2	5'UTR	island	5'UTR-island	chr12:62584768-62586268		TRUE
cg00939682	-0.200448	0.189798	-3.79604	0.00171145	0.174556	-1.72442	0.127158	0.327606	0.200448	10	16933505	F	II	CUBN	Body	opensea	Body-opensea			TRUE		rs2669153
cg15690347	0.145789	0.34078	3.79562	0.00171293	0.174556	-1.72528	0.38634	0.24055	-0.145789	19	50931515	F	I	SPIB	Body	island	Body-island	chr19:50931270-50931638	TRUE
cg08331313	-0.152017	0.209812	-3.79522	0.00171434	0.174615	-1.7261	0.162307	0.314324	0.152017	5	151066460	R	II	SPARC	1stExon	opensea	1stExon-opensea		TRUE
cg27005749	-0.147029	0.567494	-3.79356	0.00172021	0.174952	-1.7295	0.521547	0.668576	0.147029	8	141608646	F	I	EIF2C2	Body	opensea	Body-opensea			TRUE
cg00718261	0.109171	0.545424	3.79141	0.00172786	0.174952	-1.73392	0.57954	0.470369	-0.109171	7	1787944	R	II		IGR	shore	IGR-shore	chr7:1784027-1786934
cg07030704	0.139292	0.610592	3.78978	0.00173369	0.175031	-1.73726	0.654121	0.514829	-0.139292	11	112792759	F	II		IGR	opensea	IGR-opensea			TRUE
cg09644356	0.108854	0.606033	3.78893	0.00173672	0.175282	-1.73901	0.64005	0.531196	-0.108854	2	121322010	F	II		IGR	opensea	IGR-opensea		TRUE	TRUE		rs7568633
cg11123720	-0.130329	0.494879	-3.78774	0.00174098	0.175396	-1.74144	0.454151	0.58448	0.130329	5	75701065	F	II	IQGAP2	Body	shore	Body-shore	chr5:75698759-75700160		TRUE		rs58367103
cg11834730	-0.138078	0.424285	-3.78657	0.00174518	0.175427	-1.74384	0.381136	0.519214	0.138078	12	124942248	R	II	NCOR2	Body	shore	Body-shore	chr12:124941314-124941584	TRUE
cg07671446	0.149338	0.745459	3.78639	0.00174581	0.175427	-1.7442	0.792128	0.642789	-0.149338	12	55455154	R	II		IGR	opensea	IGR-opensea			TRUE
cg07296926	0.107918	0.48098	3.78456	0.00175243	0.17553	-1.74797	0.514704	0.406786	-0.107918	2	223989054	F	II		IGR	opensea	IGR-opensea			TRUE
cg23726802	0.124015	0.482726	3.78428	0.00175345	0.17553	-1.74854	0.521481	0.397466	-0.124015	7	155617398	F	I		IGR	opensea	IGR-opensea
cg23401601	0.123601	0.627978	3.78403	0.00175434	0.17553	-1.74905	0.666603	0.543002	-0.123601	13	100578634	R	II		IGR	opensea	IGR-opensea
cg25089903	0.110907	0.656172	3.78331	0.00175694	0.17553	-1.75052	0.690831	0.579924	-0.110907	12	772982	R	II	NINJ2	TSS1500	opensea	TSS1500-opensea			TRUE
cg02480675	0.117326	0.517968	3.78254	0.00175974	0.17553	-1.75211	0.554632	0.437306	-0.117326	20	6514844	R	II		IGR	opensea	IGR-opensea
cg03079754	0.15068	0.553217	3.78239	0.00176027	0.17553	-1.75241	0.600304	0.449624	-0.15068	11	26594782	R	II	MUC15	TSS1500	opensea	TSS1500-opensea			TRUE
cg27072191	0.114129	0.72784	3.78143	0.00176378	0.17553	-1.75439	0.763505	0.649376	-0.114129	16	77098093	F	II		IGR	opensea	IGR-opensea			TRUE		rs13338166
cg26635451	0.11487	0.878238	3.7812	0.00176463	0.17553	-1.75487	0.914135	0.799265	-0.11487	12	89749142	F	II		IGR	shore	IGR-shore	chr12:89745168-89748144				rs75203642
cg12799049	-0.117803	0.165788	-3.77927	0.00177165	0.175772	-1.75882	0.128974	0.246777	0.117803	1	197811487	R	II		IGR	opensea	IGR-opensea			TRUE		rs72102222	rs80243245
cg10942690	0.113102	0.843313	3.77883	0.00177326	0.175775	-1.75972	0.878657	0.765556	-0.113102	14	95538480	F	II		IGR	opensea	IGR-opensea
cg18768784	-0.11288	0.108785	-3.77877	0.00177346	0.175775	-1.75984	0.0735105	0.18639	0.11288	3	141516271	R	I	GRK7	Body	island	Body-island	chr3:141516055-141516639		TRUE
cg09513647	0.102375	0.761643	3.7777	0.00177739	0.176033	-1.76203	0.793635	0.691261	-0.102375	10	34702996	R	II	PARD3	Body	opensea	Body-opensea			TRUE
cg10122877	0.109035	0.826997	3.77655	0.00178161	0.176096	-1.7644	0.86107	0.752036	-0.109035	4	37585361	F	II	C4orf19	TSS1500	opensea	TSS1500-opensea
cg11423130	0.114419	0.720344	3.77601	0.00178359	0.176126	-1.7655	0.756099	0.641681	-0.114419	13	112630656	R	I		IGR	island	IGR-island	chr13:112630568-112630796
cg23369111	-0.10323	0.593958	-3.77436	0.00178969	0.17626	-1.7689	0.561699	0.664929	0.10323	18	52258234	F	II	C18orf26	TSS200	opensea	TSS200-opensea
cg03655371	-0.159059	0.174502	-3.77299	0.00179473	0.176341	-1.77169	0.124796	0.283855	0.159059	5	134827355	F	I		IGR	island	IGR-island	chr5:134827285-134827644		TRUE
cg20347139	-0.105703	0.307098	-3.77214	0.00179788	0.176341	-1.77344	0.274065	0.379768	0.105703	7	56605835	F	I		IGR	opensea	IGR-opensea					rs34765785
cg15348679	0.1122	0.768047	3.77188	0.00179886	0.176341	-1.77398	0.803109	0.690909	-0.1122	21	45626491	F	I		IGR	shelf	IGR-shelf	chr21:45622218-45622500	TRUE
cg05334190	0.123585	0.507321	3.77143	0.00180051	0.176341	-1.77489	0.545941	0.422356	-0.123585	13	44880206	R	II		IGR	opensea	IGR-opensea			TRUE
cg14786212	0.104183	0.811965	3.77093	0.00180239	0.176341	-1.77593	0.844522	0.740339	-0.104183	3	192947753	R	II		IGR	opensea	IGR-opensea			TRUE
cg00428457	0.125966	0.473093	3.7702	0.00180511	0.176341	-1.77743	0.512458	0.386492	-0.125966	2	119887680	R	I		IGR	opensea	IGR-opensea			TRUE
cg04685170	-0.133596	0.217232	-3.76936	0.00180822	0.176341	-1.77914	0.175483	0.309079	0.133596	7	95025855	F	II	PON3	TSS200	island	TSS200-island	chr7:95025559-95026122
cg16924816	0.118359	0.783999	3.76899	0.00180961	0.176341	-1.77991	0.820986	0.702628	-0.118359	2	206078242	F	II	PARD3B	Body	opensea	Body-opensea			TRUE
cg20313873	-0.133167	0.658665	-3.76877	0.00181043	0.176341	-1.78036	0.61705	0.750218	0.133167	10	101436820	F	II	ENTPD7	Body	opensea	Body-opensea			TRUE
cg18528073	0.148094	0.667843	3.76808	0.001813	0.176503	-1.78177	0.714122	0.566028	-0.148094	14	72270991	R	II		IGR	opensea	IGR-opensea			TRUE
cg12502751	0.147427	0.508705	3.76695	0.00181724	0.176688	-1.78409	0.554776	0.40735	-0.147427	5	171726404	R	II		IGR	shelf	IGR-shelf	chr5:171723742-171724111
cg25334660	-0.152148	0.195476	-3.76666	0.00181832	0.176688	-1.78468	0.14793	0.300078	0.152148	8	42270520	R	II		IGR	shore	IGR-shore	chr8:42268436-42268759		TRUE
cg03561416	0.116082	0.808878	3.76633	0.00181956	0.176724	-1.78536	0.845153	0.729071	-0.116082	6	157254584	F	II	ARID1B	Body	opensea	Body-opensea			TRUE
cg18733548	0.100459	0.446978	3.76511	0.00182413	0.176724	-1.78786	0.478372	0.377912	-0.100459	17	77766817	R	II		IGR	island	IGR-island	chr17:77763364-77767356		TRUE
cg24691911	0.111721	0.641071	3.76482	0.00182524	0.176724	-1.78846	0.675984	0.564263	-0.111721	2	150991316	F	II		IGR	opensea	IGR-opensea			TRUE
cg21090457	0.12251	0.307049	3.76479	0.00182533	0.176724	-1.78851	0.345333	0.222823	-0.12251	3	77573709	F	II	ROBO2	Body	opensea	Body-opensea			TRUE
cg12378888	0.13035	0.155384	3.76475	0.00182551	0.176724	-1.78861	0.196118	0.0657679	-0.13035	4	4867102	R	I		IGR	shore	IGR-shore	chr4:4867386-4867673				rs76885731
cg13106758	-0.168061	0.198866	-3.76461	0.00182601	0.176724	-1.78888	0.146347	0.314408	0.168061	15	101708575	R	II		IGR	opensea	IGR-opensea		TRUE	TRUE
cg00657094	0.110372	0.713216	3.76351	0.00183017	0.176817	-1.79115	0.747707	0.637335	-0.110372	1	1174190	F	I		IGR	island	IGR-island	chr1:1173915-1174263		TRUE
cg09749669	0.12654	0.583342	3.76286	0.00183262	0.176817	-1.79248	0.622886	0.496345	-0.12654	11	15990149	F	II	SOX6	3'UTR	opensea	3'UTR-opensea			TRUE			rs75382723
cg01189072	0.172247	0.756129	3.76278	0.00183291	0.176817	-1.79263	0.809957	0.63771	-0.172247	1	1610660	F	I	CDK11B	Body	shelf	Body-shelf	chr1:1607898-1608243		TRUE
cg02720426	0.118437	0.830807	3.76215	0.00183533	0.176817	-1.79394	0.867819	0.749382	-0.118437	4	190764659	F	II		IGR	shelf	IGR-shelf	chr4:190767204-190767597				rs78471534
cg17728065	0.127345	0.714525	3.76131	0.00183848	0.176896	-1.79565	0.754321	0.626975	-0.127345	15	61220843	R	II	RORA	Body	opensea	Body-opensea			TRUE
cg19316148	-0.100559	0.131009	-3.75958	0.00184505	0.176967	-1.7992	0.0995842	0.200143	0.100559	1	31846089	F	II	FABP3	TSS200	opensea	TSS200-opensea		TRUE	TRUE
cg24074177	0.110789	0.764217	3.75872	0.00184833	0.176967	-1.80096	0.798839	0.68805	-0.110789	4	26492488	R	II	CCKAR	TSS1500	opensea	TSS1500-opensea
cg19477205	0.140829	0.621624	3.75866	0.00184857	0.176967	-1.80109	0.665633	0.524804	-0.140829	14	101525106	R	II	MIR154	TSS1500	opensea	TSS1500-opensea
cg24802745	0.107438	0.776362	3.75798	0.00185119	0.176967	-1.8025	0.809936	0.702498	-0.107438	4	1029654	F	II		IGR	shore	IGR-shore	chr4:1027679-1028019	TRUE
cg23097961	0.100033	0.707338	3.75726	0.00185392	0.177046	-1.80397	0.738598	0.638565	-0.100033	19	49055412	F	I	SULT2B1	TSS200	opensea	TSS200-opensea
cg25942572	0.142809	0.711691	3.75633	0.00185746	0.177214	-1.80586	0.756318	0.61351	-0.142809	10	48562408	F	II		IGR	opensea	IGR-opensea			TRUE
cg23214395	0.125875	0.760031	3.75489	0.00186299	0.177287	-1.80882	0.799367	0.673492	-0.125875	1	20141778	R	II	RNF186	TSS200	opensea	TSS200-opensea
cg16698814	0.115857	0.217744	3.75426	0.00186543	0.177287	-1.81012	0.25395	0.138092	-0.115857	19	51524763	F	II	KLK10	TSS1500	shore	TSS1500-shore	chr19:51522004-51522803	TRUE
cg13655303	0.103626	0.573168	3.75421	0.00186561	0.177287	-1.81022	0.605551	0.501925	-0.103626	20	56134648	R	II	PCK1	TSS1500	opensea	TSS1500-opensea
cg01883051	0.121049	0.649752	3.75311	0.00186985	0.177287	-1.81248	0.68758	0.566531	-0.121049	6	67178610	F	II		IGR	opensea	IGR-opensea			TRUE			rs79827453
cg15719339	0.107569	0.418803	3.7528	0.00187106	0.177287	-1.81312	0.452418	0.344849	-0.107569	21	17960584	F	II	C21orf34	Body	opensea	Body-opensea			TRUE		rs75623773
cg24375626	0.101781	0.782953	3.75225	0.00187317	0.177287	-1.81424	0.81476	0.712979	-0.101781	1	182098716	F	II		IGR	opensea	IGR-opensea			TRUE
cg03049691	-0.171614	0.270738	-3.7514	0.00187645	0.177309	-1.81598	0.217108	0.388723	0.171614	17	27039032	R	II	PROCA1	TSS200	shore	TSS200-shore	chr17:27038084-27038919		TRUE
cg15273575	0.111667	0.742692	3.75136	0.00187664	0.177309	-1.81608	0.777588	0.665921	-0.111667	6	145090803	F	II	UTRN	Body	opensea	Body-opensea			TRUE
cg12427469	0.115013	0.777563	3.7507	0.00187916	0.177375	-1.81741	0.813505	0.698492	-0.115013	11	2809574	R	II	KCNQ1	Body	shelf	Body-shelf	chr11:2812415-2813396		TRUE
cg21843586	0.109784	0.815428	3.7495	0.00188383	0.177375	-1.81988	0.849735	0.739951	-0.109784	11	2397201	R	II	CD81	TSS1500	shore	TSS1500-shore	chr11:2398223-2399598				rs16928200
cg03816707	-0.100566	0.21686	-3.74927	0.00188474	0.177375	-1.82036	0.185433	0.286	0.100566	20	43726544	R	I	KCNS1	Body	island	Body-island	chr20:43726297-43727372	TRUE
cg10182421	0.114754	0.64297	3.74778	0.00189053	0.177375	-1.82341	0.678831	0.564077	-0.114754	8	49651102	R	II		IGR	shelf	IGR-shelf	chr8:49647702-49647988
cg05181702	-0.121869	0.459832	-3.74727	0.00189251	0.177375	-1.82445	0.421747	0.543617	0.121869	X	9983462	R	I	WWC3	TSS1500	island	TSS1500-island	chrX:9982513-9984583			high-CpG:9943284-9943571
cg11919837	-0.147308	0.69873	-3.74667	0.00189485	0.177375	-1.82568	0.652696	0.800004	0.147308	8	57350735	R	II		IGR	shore	IGR-shore	chr8:57350947-57351285	TRUE
cg01022219	-0.138143	0.371428	-3.74654	0.00189539	0.177375	-1.82596	0.328258	0.466401	0.138143	18	13641735	R	I	C18orf1	Body	island	Body-island	chr18:13641584-13642415	TRUE
cg04591648	0.127339	0.706462	3.74602	0.00189742	0.177375	-1.82703	0.746256	0.618917	-0.127339	7	155791233	R	II		IGR	opensea	IGR-opensea
cg12186317	0.124718	0.730814	3.74586	0.00189804	0.177375	-1.82735	0.769788	0.64507	-0.124718	5	1183173	F	I		IGR	opensea	IGR-opensea
cg14306366	0.138705	0.798967	3.74576	0.00189843	0.177375	-1.82756	0.842312	0.703608	-0.138705	12	31406441	R	II		IGR	shore	IGR-shore	chr12:31405184-31405545					rs78537441
cg02078292	0.13865	0.839301	3.7452	0.00190062	0.177375	-1.8287	0.882629	0.743979	-0.13865	11	2397655	R	II	CD81	TSS1500	shore	TSS1500-shore	chr11:2398223-2399598
cg20995928	0.124811	0.657175	3.74519	0.00190067	0.177375	-1.82873	0.696179	0.571368	-0.124811	1	120229863	R	II		IGR	opensea	IGR-opensea			TRUE
cg12382398	-0.150805	0.234264	-3.74486	0.00190194	0.177375	-1.82939	0.187137	0.337942	0.150805	15	90358537	R	II	ANPEP	TSS1500	island	TSS1500-island	chr15:90357402-90358573
cg13970894	0.130841	0.480991	3.74414	0.00190479	0.177375	-1.83088	0.521879	0.391038	-0.130841	10	134619422	F	I		IGR	shore	IGR-shore	chr10:134621072-134621372				rs2804020
cg20804101	0.120442	0.498949	3.74366	0.00190665	0.177375	-1.83185	0.536587	0.416145	-0.120442	12	371916	R	II	SLC6A13	5'UTR	opensea	5'UTR-opensea			TRUE
cg18247055	-0.127605	0.199755	-3.74361	0.00190687	0.177375	-1.83197	0.159879	0.287483	0.127605	10	22634226	R	I	SPAG6	TSS200	island	TSS200-island	chr10:22634000-22634862
cg00285343	0.11417	0.841244	3.74347	0.0019074	0.177375	-1.83224	0.876922	0.762752	-0.11417	7	41733356	F	II	LOC285954	TSS200	opensea	TSS200-opensea
cg20598190	0.107364	0.367494	3.7431	0.00190887	0.177375	-1.833	0.401045	0.293682	-0.107364	2	240866924	F	II		IGR	shore	IGR-shore	chr2:240868278-240868590	TRUE
cg11994229	0.125396	0.814724	3.74231	0.00191197	0.177435	-1.83462	0.85391	0.728515	-0.125396	2	153310258	F	II	FMNL2	Body	opensea	Body-opensea			TRUE			rs74809814
cg19602694	0.115721	0.71224	3.74187	0.00191373	0.177465	-1.83553	0.748403	0.632682	-0.115721	1	95783866	R	II		IGR	opensea	IGR-opensea
cg26993035	0.131286	0.647	3.74157	0.0019149	0.177465	-1.83614	0.688027	0.556741	-0.131286	6	71995153	F	II		IGR	shelf	IGR-shelf	chr6:71998106-71999109
cg20336352	0.107811	0.875799	3.74121	0.00191631	0.177465	-1.83688	0.90949	0.801679	-0.107811	10	69848268	F	II		IGR	opensea	IGR-opensea			TRUE		rs541564
cg09189354	0.122773	0.721255	3.74106	0.00191693	0.177465	-1.8372	0.759621	0.636849	-0.122773	20	11668225	R	II		IGR	shore	IGR-shore	chr20:11667522-11667997		TRUE
cg11596387	0.103652	0.772041	3.74028	0.00192001	0.177474	-1.83879	0.804433	0.700781	-0.103652	2	66468536	R	II		IGR	opensea	IGR-opensea			TRUE
cg21495715	0.103584	0.74932	3.74014	0.00192058	0.177474	-1.83908	0.78169	0.678107	-0.103584	17	18854560	R	II	SLC5A10	TSS1500	opensea	TSS1500-opensea
cg00754604	-0.106106	0.800923	-3.73933	0.0019238	0.177474	-1.84075	0.767765	0.873871	0.106106	2	161230046	R	II	RBMS1	Body	opensea	Body-opensea			TRUE
cg03467001	-0.107194	0.390943	-3.73729	0.00193188	0.177474	-1.84492	0.357445	0.464639	0.107194	1	183857649	R	II	RGL1	Body	opensea	Body-opensea			TRUE
cg25508679	-0.182423	0.347162	-3.73716	0.00193243	0.177474	-1.8452	0.290155	0.472577	0.182423	6	28956403	F	II		IGR	island	IGR-island	chr6:28956106-28956578				rs3129792
cg14816421	0.120877	0.679124	3.73692	0.00193337	0.177474	-1.84568	0.716898	0.596021	-0.120877	6	147457355	F	II		IGR	opensea	IGR-opensea			TRUE
cg09419251	0.127622	0.75477	3.73674	0.0019341	0.177474	-1.84606	0.794652	0.667029	-0.127622	12	113215623	R	II		IGR	opensea	IGR-opensea			TRUE
cg06822689	-0.124633	0.0922257	-3.73561	0.00193859	0.177474	-1.84836	0.0532778	0.177911	0.124633	3	141516291	R	II	GRK7	Body	island	Body-island	chr3:141516055-141516639		TRUE
cg15712974	0.126636	0.843106	3.73404	0.00194489	0.177562	-1.85159	0.88268	0.756044	-0.126636	1	59318844	F	II		IGR	opensea	IGR-opensea			TRUE
cg16908824	0.116005	0.728519	3.73391	0.00194542	0.177563	-1.85186	0.764771	0.648766	-0.116005	19	54260952	R	II	MIR1283-2	TSS1500	opensea	TSS1500-opensea
cg04965094	0.112886	0.822879	3.73319	0.00194829	0.177565	-1.85333	0.858155	0.745269	-0.112886	13	45854777	F	II	GTF2F2	Body	opensea	Body-opensea			TRUE
cg13545089	0.100492	0.868814	3.73304	0.0019489	0.177565	-1.85363	0.900218	0.799726	-0.100492	19	5915037	R	I	CAPS	Body	island	Body-island	chr19:5915007-5915301		TRUE		rs78387443
cg14398963	0.11343	0.811068	3.73298	0.00194914	0.177565	-1.85376	0.846515	0.733084	-0.11343	11	2397538	R	II	CD81	TSS1500	shore	TSS1500-shore	chr11:2398223-2399598
cg24760165	0.122982	0.848621	3.73227	0.00195201	0.17763	-1.85522	0.887053	0.76407	-0.122982	6	158142609	R	II		IGR	opensea	IGR-opensea
cg18760055	0.106105	0.724207	3.73152	0.00195503	0.177735	-1.85676	0.757365	0.65126	-0.106105	1	10788219	R	II	CASZ1	5'UTR	opensea	5'UTR-opensea			TRUE
cg19256731	-0.152011	0.387578	-3.73017	0.0019605	0.17776	-1.85953	0.340074	0.492085	0.152011	20	1874527	F	I	SIRPA	TSS1500	shore	TSS1500-shore	chr20:1874933-1875718
cg23227462	0.103787	0.619834	3.7277	0.00197051	0.17776	-1.86459	0.652267	0.54848	-0.103787	2	240868631	F	II		IGR	shore	IGR-shore	chr2:240868278-240868590
cg00473916	0.121225	0.732609	3.72713	0.00197284	0.17776	-1.86577	0.770492	0.649266	-0.121225	2	183878531	R	II	NCKAP1	Body	opensea	Body-opensea			TRUE
cg25249728	0.142642	0.810407	3.72679	0.00197421	0.17776	-1.86646	0.854982	0.71234	-0.142642	2	55391421	R	II		IGR	opensea	IGR-opensea			TRUE
cg00920348	-0.128366	0.125151	-3.72624	0.00197646	0.17776	-1.86759	0.0850367	0.213403	0.128366	1	66999304	F	II	SGIP1	TSS1500	shore	TSS1500-shore	chr1:66998728-66999060	TRUE
cg18486102	-0.11776	0.102797	-3.72543	0.00197977	0.177761	-1.86925	0.0659973	0.183758	0.11776	12	50297777	R	I	FAIM2	TSS200	island	TSS200-island	chr12:50297580-50297988		TRUE
cg03415545	0.11315	0.64804	3.72514	0.00198094	0.177761	-1.86984	0.683399	0.570249	-0.11315	4	100274039	R	I	ADH1C	TSS200	opensea	TSS200-opensea			TRUE
cg01377268	0.118313	0.620477	3.72485	0.00198213	0.177761	-1.87044	0.657449	0.539137	-0.118313	2	239925497	F	I		IGR	opensea	IGR-opensea
cg08942527	0.12947	0.489656	3.72461	0.00198311	0.177761	-1.87093	0.530116	0.400645	-0.12947	5	106801945	F	II	EFNA5	Body	opensea	Body-opensea			TRUE		rs27355
cg16629288	0.115004	0.212345	3.72402	0.00198552	0.177761	-1.87213	0.248284	0.133279	-0.115004	3	69590374	F	II		IGR	shore	IGR-shore	chr3:69591011-69592050
cg07735920	0.147812	0.797457	3.724	0.00198561	0.177761	-1.87218	0.843648	0.695836	-0.147812	10	2815547	R	II		IGR	shore	IGR-shore	chr10:2815003-2815469
cg20581674	0.138057	0.519514	3.72304	0.00198954	0.177838	-1.87414	0.562657	0.4246	-0.138057	3	24887420	F	II		IGR	opensea	IGR-opensea			TRUE
cg08695357	0.125285	0.698607	3.72177	0.00199476	0.177861	-1.87675	0.737758	0.612473	-0.125285	15	93618028	F	II	RGMA	TSS1500	shore	TSS1500-shore	chr15:93615622-93617185
cg27543385	0.106102	0.630607	3.72092	0.00199829	0.177875	-1.87851	0.663764	0.557662	-0.106102	17	71800219	F	II	C17orf54	Body	opensea	Body-opensea			TRUE
cg10797552	0.126837	0.839237	3.72009	0.00200171	0.178013	-1.8802	0.878874	0.752037	-0.126837	8	129382151	F	II		IGR	opensea	IGR-opensea			TRUE
cg01720337	0.109822	0.661336	3.71954	0.00200399	0.178013	-1.88133	0.695656	0.585833	-0.109822	3	1134711	F	II	CNTN6	5'UTR	opensea	5'UTR-opensea			TRUE
cg12762089	0.112894	0.820054	3.71829	0.00200914	0.178013	-1.88388	0.855333	0.742439	-0.112894	11	134395000	F	II		IGR	opensea	IGR-opensea
cg06372607	0.11166	0.839221	3.71818	0.0020096	0.178013	-1.88411	0.874115	0.762455	-0.11166	16	55368072	R	II		IGR	shelf	IGR-shelf	chr16:55364823-55365483
cg17592148	-0.320185	0.44468	-3.71817	0.00200966	0.178013	-1.88414	0.344622	0.664807	0.320185	X	105969956	F	I	RNF128	1stExon	island	1stExon-island	chrX:105969686-105970598	TRUE		high-CpG:105856531-105856626
cg19912309	0.111802	0.715135	3.71804	0.00201019	0.178013	-1.8844	0.750073	0.638271	-0.111802	6	170467967	F	II		IGR	opensea	IGR-opensea		TRUE	TRUE
cg14243817	0.100755	0.565342	3.7174	0.00201283	0.178013	-1.88571	0.596828	0.496073	-0.100755	9	138876879	R	II		IGR	shelf	IGR-shelf	chr9:138873235-138874005
cg02286091	-0.110242	0.257279	-3.71703	0.00201439	0.178013	-1.88648	0.222828	0.33307	0.110242	5	78407678	F	I	BHMT	5'UTR	opensea	5'UTR-opensea			TRUE		rs1050824
cg11241541	-0.116243	0.160807	-3.71613	0.00201811	0.178013	-1.88831	0.124481	0.240724	0.116243	8	38586066	F	I	TACC1	1stExon	opensea	1stExon-opensea			TRUE
cg27662633	0.103064	0.768653	3.71603	0.00201856	0.178013	-1.88853	0.80086	0.697797	-0.103064	7	30395138	F	II	ZNRF2	Body	opensea	Body-opensea			TRUE		rs35873984	rs75555531
cg13315923	0.133024	0.807082	3.71539	0.0020212	0.178013	-1.88983	0.848652	0.715628	-0.133024	3	171921695	F	II	FNDC3B	Body	opensea	Body-opensea			TRUE
cg02909446	0.103065	0.620077	3.71522	0.00202192	0.178013	-1.89018	0.652285	0.54922	-0.103065	10	73849124	F	II	SPOCK2	TSS1500	shore	TSS1500-shore	chr10:73846806-73848233		TRUE		rs16929660
cg16823064	0.105378	0.794624	3.71511	0.0020224	0.178013	-1.89042	0.827554	0.722176	-0.105378	1	19206559	R	I	ALDH4A1	Body	shelf	Body-shelf	chr1:19209626-19209914		TRUE
cg15394255	0.102985	0.643072	3.71462	0.00202441	0.178034	-1.89141	0.675255	0.57227	-0.102985	12	87232821	R	II	MGAT4C	TSS200	opensea	TSS200-opensea
cg13244241	0.102346	0.81861	3.71388	0.00202753	0.178034	-1.89294	0.850593	0.748247	-0.102346	10	102491731	R	I		IGR	shore	IGR-shore	chr10:102489343-102491011
cg26631454	0.114385	0.577392	3.71344	0.00202936	0.178034	-1.89383	0.613138	0.498753	-0.114385	13	114065669	F	II		IGR	shore	IGR-shore	chr13:114066946-114067488	TRUE	TRUE
cg15517113	0.140852	0.748126	3.71227	0.00203426	0.178034	-1.89623	0.792143	0.651291	-0.140852	2	620265	R	I		IGR	shore	IGR-shore	chr2:620639-621993
cg17801930	0.114922	0.845099	3.70902	0.00204796	0.178034	-1.9029	0.881012	0.76609	-0.114922	5	56009405	R	II		IGR	opensea	IGR-opensea			TRUE
cg15210307	0.120441	0.640261	3.70821	0.00205138	0.178034	-1.90455	0.677899	0.557458	-0.120441	1	32498089	R	II	KHDRBS1	Body	opensea	Body-opensea			TRUE
cg02639095	-0.11793	0.371963	-3.70798	0.00205238	0.178034	-1.90504	0.33511	0.45304	0.11793	9	15307873	R	II	TTC39B	TSS1500	shore	TSS1500-shore	chr9:15306722-15307386
cg11638842	-0.140821	0.170303	-3.70707	0.00205621	0.178034	-1.90688	0.126296	0.267118	0.140821	2	238343702	F	II		IGR	opensea	IGR-opensea
cg19905270	0.107126	0.792999	3.70648	0.00205873	0.178034	-1.9081	0.826476	0.71935	-0.107126	5	92635711	F	II		IGR	opensea	IGR-opensea			TRUE
cg14323173	-0.136378	0.0585907	-3.70641	0.00205904	0.178034	-1.90825	0.0159725	0.152351	0.136378	7	92747373	R	II	SAMD9	TSS200	opensea	TSS200-opensea		TRUE
cg13716026	0.154484	0.518404	3.70472	0.00206624	0.178034	-1.91172	0.56668	0.412197	-0.154484	9	75192209	F	II	TMC1	5'UTR	opensea	5'UTR-opensea			TRUE
cg24654674	0.124469	0.545847	3.7046	0.00206675	0.178034	-1.91196	0.584744	0.460275	-0.124469	7	23106838	F	II		IGR	opensea	IGR-opensea			TRUE			rs78889508
cg12479444	-0.17826	0.184924	-3.70383	0.00207002	0.178034	-1.91353	0.129217	0.307478	0.17826	7	63361394	F	I		IGR	island	IGR-island	chr7:63361126-63361493	TRUE
cg24834751	0.135339	0.705618	3.70332	0.00207221	0.178034	-1.91458	0.747912	0.612573	-0.135339	10	131194447	F	II		IGR	opensea	IGR-opensea
cg16580700	-0.131401	0.188666	-3.70198	0.00207796	0.178034	-1.91733	0.147603	0.279005	0.131401	6	30685744	R	II	MDC1	TSS1500	shore	TSS1500-shore	chr6:30684836-30685503
cg24172324	-0.103402	0.65435	-3.70118	0.00208139	0.178034	-1.91898	0.622036	0.725438	0.103402	2	232258363	F	II		IGR	shore	IGR-shore	chr2:232260100-232261134
cg19846154	0.149969	0.610188	3.70009	0.00208605	0.178034	-1.9212	0.657053	0.507084	-0.149969	8	74332112	R	II		IGR	opensea	IGR-opensea		TRUE	TRUE
cg26342147	-0.101446	0.446449	-3.69998	0.00208652	0.178034	-1.92142	0.414747	0.516194	0.101446	10	119295827	R	II	EMX2OS	Body	island	Body-island	chr10:119293917-119297675	TRUE
cg25868286	-0.111828	0.118479	-3.69998	0.00208653	0.178034	-1.92142	0.0835331	0.195361	0.111828	17	42092488	R	II	TMEM101	TSS200	shore	TSS200-shore	chr17:42091712-42091948
cg09124703	-0.188615	0.0982	-3.69985	0.00208712	0.178034	-1.9217	0.0392579	0.227873	0.188615	5	145316063	R	II	SH3RF2	TSS200	shore	TSS200-shore	chr5:145316145-145316354	TRUE
cg06878548	0.112413	0.50231	3.69963	0.00208807	0.178034	-1.92216	0.537439	0.425026	-0.112413	8	514821	R	I		IGR	opensea	IGR-opensea						rs76227384
cg21288685	-0.127905	0.173216	-3.69861	0.00209244	0.178034	-1.92423	0.133246	0.261151	0.127905	1	1109244	F	II	TTLL10	TSS200	shore	TSS200-shore	chr1:1109314-1110145		TRUE			rs5010607
cg09128169	0.119728	0.827073	3.6984	0.00209337	0.178034	-1.92467	0.864488	0.74476	-0.119728	8	8735969	R	II	MFHAS1	Body	opensea	Body-opensea			TRUE
cg12912758	0.119902	0.601174	3.69619	0.00210292	0.178257	-1.92919	0.638643	0.518741	-0.119902	6	1594591	R	II		IGR	opensea	IGR-opensea
cg26239816	0.121381	0.817802	3.6959	0.0021042	0.178257	-1.9298	0.855733	0.734353	-0.121381	22	25615317	F	I	CRYBB2	TSS1500	opensea	TSS1500-opensea					rs73879217
cg04276953	0.118373	0.248754	3.694	0.00211248	0.178438	-1.9337	0.285745	0.167372	-0.118373	1	18980700	F	II	PAX7	Body	opensea	Body-opensea			TRUE
cg04098263	0.156846	0.794844	3.6938	0.00211335	0.178451	-1.9341	0.843858	0.687012	-0.156846	6	2382649	F	II		IGR	opensea	IGR-opensea					rs6915741
cg00292073	0.177796	0.667242	3.69348	0.00211474	0.178461	-1.93476	0.722803	0.545007	-0.177796	16	1187671	R	I		IGR	opensea	IGR-opensea
cg05460486	0.101861	0.741921	3.69219	0.00212038	0.178615	-1.9374	0.773753	0.671892	-0.101861	2	53331760	R	II		IGR	opensea	IGR-opensea			TRUE
cg15045356	0.103328	0.760059	3.69102	0.00212548	0.178855	-1.93979	0.792349	0.689021	-0.103328	11	11969590	F	I	USP47	Body	opensea	Body-opensea			TRUE
cg05334363	0.111381	0.87266	3.69019	0.00212915	0.178855	-1.9415	0.907467	0.796085	-0.111381	17	1326624	F	II	CRK	3'UTR	opensea	3'UTR-opensea		TRUE	TRUE		rs61762271
cg12506468	0.118072	0.722638	3.68993	0.00213027	0.178855	-1.94202	0.759536	0.641463	-0.118072	X	33147978	F	II	DMD	TSS1500	opensea	TSS1500-opensea
cg11222053	0.107009	0.655604	3.68941	0.00213257	0.178922	-1.94309	0.689044	0.582035	-0.107009	17	48132102	F	II	ITGA3	TSS1500	shore	TSS1500-shore	chr17:48132994-48134084
cg08922603	0.102946	0.868494	3.68726	0.00214206	0.179128	-1.9475	0.900665	0.797719	-0.102946	4	4763690	R	II		IGR	opensea	IGR-opensea
cg16252110	0.120474	0.791405	3.68689	0.00214372	0.179218	-1.94827	0.829053	0.70858	-0.120474	5	2866877	F	I		IGR	island	IGR-island	chr5:2866699-2867005				rs10044519
cg23475035	-0.103042	0.47789	-3.68646	0.00214561	0.179243	-1.94914	0.445689	0.548731	0.103042	14	54686184	F	II		IGR	opensea	IGR-opensea					rs79389724
cg00230584	0.10684	0.699645	3.6827	0.00216233	0.179671	-1.95685	0.733033	0.626193	-0.10684	5	97833812	F	II		IGR	opensea	IGR-opensea			TRUE
cg21109666	-0.116656	0.79357	-3.68269	0.00216238	0.179671	-1.95688	0.757116	0.873771	0.116656	1	232007841	R	II	DISC1	Body	opensea	Body-opensea			TRUE
cg16621196	0.108046	0.890697	3.68259	0.00216284	0.179672	-1.95708	0.924462	0.816416	-0.108046	10	130757242	F	II		IGR	opensea	IGR-opensea
cg10407598	0.106407	0.522753	3.68199	0.00216552	0.179719	-1.95832	0.556005	0.449598	-0.106407	17	73629365	F	I	RECQL5	Body	shore	Body-shore	chr17:73627542-73627824		TRUE		rs34150562
cg27290624	-0.155719	0.183829	-3.68141	0.00216808	0.17981	-1.95949	0.135167	0.290886	0.155719	3	194208441	R	I		IGR	island	IGR-island	chr3:194207385-194208785
cg06470951	0.107033	0.748504	3.68043	0.0021725	0.179937	-1.96151	0.781952	0.674919	-0.107033	2	240366416	F	II		IGR	opensea	IGR-opensea		TRUE	TRUE
cg06156093	-0.166396	0.294111	-3.67744	0.00218595	0.179997	-1.96763	0.242113	0.408509	0.166396	1	184633273	R	I		IGR	island	IGR-island	chr1:184633223-184633663	TRUE	TRUE
cg10439402	0.11709	0.746682	3.67609	0.00219206	0.180285	-1.9704	0.783272	0.666183	-0.11709	2	98386770	F	II	TMEM131	Body	opensea	Body-opensea			TRUE
cg24233426	-0.171624	0.165476	-3.67555	0.00219448	0.180393	-1.9715	0.111844	0.283467	0.171624	7	52156170	F	II		IGR	opensea	IGR-opensea
cg15029285	-0.105375	0.566413	-3.6737	0.00220291	0.180548	-1.97531	0.533483	0.638858	0.105375	X	45060311	R	II	CXorf36	TSS200	opensea	TSS200-opensea
cg13519035	-0.200546	0.354781	-3.67342	0.00220417	0.180548	-1.97587	0.29211	0.492656	0.200546	12	34261006	F	I		IGR	island	IGR-island	chr12:34260736-34261698
cg23836163	0.104608	0.641036	3.6727	0.00220743	0.180548	-1.97734	0.673726	0.569118	-0.104608	2	157393600	F	II	GPD2	Body	opensea	Body-opensea			TRUE
cg07743730	0.101591	0.543168	3.67186	0.00221128	0.180598	-1.97907	0.574916	0.473325	-0.101591	13	108817948	R	II		IGR	opensea	IGR-opensea			TRUE
cg21498490	0.11156	0.680928	3.67186	0.00221128	0.180598	-1.97907	0.71579	0.60423	-0.11156	8	143182559	F	I		IGR	opensea	IGR-opensea					rs7839899
cg03612333	0.119493	0.644463	3.67069	0.00221665	0.180684	-1.98148	0.681804	0.562312	-0.119493	1	183746956	F	II	RGL1	Body	opensea	Body-opensea			TRUE
cg16477611	0.109446	0.510472	3.66978	0.0022208	0.180688	-1.98333	0.544674	0.435228	-0.109446	16	50896074	R	II		IGR	opensea	IGR-opensea		TRUE	TRUE
cg20737259	0.117378	0.686393	3.66973	0.00222104	0.180688	-1.98344	0.723074	0.605696	-0.117378	4	95038723	R	II		IGR	opensea	IGR-opensea			TRUE			rs74710824
cg02694521	0.104554	0.812081	3.66963	0.0022215	0.180688	-1.98365	0.844754	0.7402	-0.104554	13	114055881	F	I		IGR	shore	IGR-shore	chr13:114056100-114056577				rs7331116
cg23035172	0.134827	0.80266	3.66917	0.00222358	0.180688	-1.98457	0.844793	0.709966	-0.134827	5	179443379	F	II	MIR340	TSS1500	opensea	TSS1500-opensea					rs17079968
cg19282443	0.100569	0.757924	3.66875	0.00222553	0.180701	-1.98544	0.789352	0.688783	-0.100569	3	60541935	R	II	FHIT	5'UTR	opensea	5'UTR-opensea			TRUE
cg02772619	0.120084	0.832775	3.66861	0.00222616	0.180701	-1.98572	0.870301	0.750217	-0.120084	9	86753573	F	II		IGR	shore	IGR-shore	chr9:86755385-86755700
cg08922584	0.15344	0.624441	3.66734	0.00223204	0.180843	-1.98834	0.672391	0.518951	-0.15344	13	101277847	F	I	TMTC4	Body	opensea	Body-opensea			TRUE
cg06315439	0.114773	0.756927	3.66699	0.00223361	0.180875	-1.98904	0.792794	0.678021	-0.114773	17	47448633	F	II		IGR	opensea	IGR-opensea			TRUE
cg06518618	0.113627	0.598908	3.66536	0.00224117	0.181098	-1.99239	0.634417	0.52079	-0.113627	16	1210829	R	I	CACNA1H	Body	island	Body-island	chr16:1209939-1210945		TRUE
cg12453504	0.114044	0.795269	3.66519	0.00224196	0.181098	-1.99274	0.830907	0.716864	-0.114044	4	185382704	R	II	IRF2	5'UTR	opensea	5'UTR-opensea			TRUE
cg19942383	0.144083	0.589722	3.66272	0.00225342	0.181202	-1.9978	0.634748	0.490665	-0.144083	3	42979226	R	II		IGR	shore	IGR-shore	chr3:42977830-42978090
cg03157509	0.116981	0.571748	3.66223	0.0022557	0.181202	-1.99881	0.608305	0.491324	-0.116981	19	1313407	R	I		IGR	island	IGR-island	chr19:1312787-1313528		TRUE
cg27584546	0.112627	0.460744	3.6616	0.00225865	0.181202	-2.0001	0.49594	0.383313	-0.112627	10	98657118	F	II	LCOR	5'UTR	opensea	5'UTR-opensea			TRUE
cg19798702	0.113208	0.69499	3.66152	0.00225902	0.181202	-2.00026	0.730367	0.61716	-0.113208	3	197247751	R	II	BDH1	Body	opensea	Body-opensea		TRUE	TRUE
cg16440561	-0.122978	0.568401	-3.66133	0.00225988	0.181202	-2.00064	0.529971	0.652949	0.122978	2	220312854	F	I	SPEG	Body	island	Body-island	chr2:220312698-220314094		TRUE	high-CpG:220021098-220021099
cg14518209	-0.12814	0.158173	-3.66121	0.00226044	0.181202	-2.00089	0.118129	0.246269	0.12814	5	151066268	R	II	SPARC	5'UTR	opensea	5'UTR-opensea			TRUE
cg26857315	-0.137442	0.20658	-3.66079	0.0022624	0.181202	-2.00175	0.16363	0.301072	0.137442	19	932759	R	I	ARID3A	Body	island	Body-island	chr19:932598-932845	TRUE				rs34016370
cg19743317	-0.132286	0.271861	-3.66058	0.0022634	0.181202	-2.00219	0.230522	0.362808	0.132286	X	6147159	R	II	NLGN4X	TSS1500	shore	TSS1500-shore	chrX:6144120-6145906
cg19480385	0.108893	0.414963	3.66027	0.00226485	0.181202	-2.00282	0.448992	0.340099	-0.108893	7	47078738	F	II		IGR	opensea	IGR-opensea			TRUE
cg23709838	-0.108753	0.324291	-3.66022	0.00226508	0.181202	-2.00292	0.290306	0.399059	0.108753	X	48768883	F	II	SLC35A2	1stExon	island	1stExon-island	chrX:48768763-48769474	TRUE
cg04094225	0.154514	0.689893	3.65991	0.00226655	0.181202	-2.00357	0.738179	0.583665	-0.154514	6	24930971	F	II		IGR	opensea	IGR-opensea			TRUE
cg01080600	0.100081	0.824677	3.65981	0.00226701	0.181202	-2.00377	0.855953	0.755872	-0.100081	2	236443773	R	II	AGAP1	Body	shore	Body-shore	chr2:236443815-236444025		TRUE
cg03717584	0.11503	0.503387	3.65976	0.00226724	0.181202	-2.00387	0.539334	0.424304	-0.11503	10	74498683	R	II	CCDC109A	Body	opensea	Body-opensea			TRUE
cg07270872	0.103474	0.500654	3.65975	0.0022673	0.181202	-2.00389	0.532989	0.429515	-0.103474	10	3678924	F	II		IGR	opensea	IGR-opensea
cg24599709	0.130442	0.61664	3.6595	0.00226847	0.181202	-2.00441	0.657403	0.526961	-0.130442	2	26578508	F	II	SELI	Body	opensea	Body-opensea			TRUE
cg10665961	0.114313	0.796459	3.65935	0.00226914	0.181202	-2.0047	0.832182	0.717869	-0.114313	17	8958039	R	I	NTN1	Body	opensea	Body-opensea			TRUE
cg21995710	0.128597	0.623303	3.65871	0.00227218	0.181259	-2.00603	0.66349	0.534892	-0.128597	2	32514311	F	II	YIPF4	Body	opensea	Body-opensea			TRUE
cg01756899	0.116329	0.758269	3.65818	0.00227467	0.181319	-2.00711	0.794621	0.678293	-0.116329	16	1070137	R	II		IGR	island	IGR-island	chr16:1069294-1070214	TRUE
cg01474781	0.134158	0.772447	3.65717	0.00227941	0.181337	-2.00918	0.814371	0.680213	-0.134158	2	100279893	R	II	AFF3	Body	opensea	Body-opensea			TRUE
cg22891595	0.113957	0.694006	3.65681	0.00228111	0.181404	-2.00992	0.729618	0.61566	-0.113957	3	193570256	R	II		IGR	opensea	IGR-opensea			TRUE
cg23674602	0.107492	0.742041	3.65595	0.00228515	0.181555	-2.01167	0.775632	0.668141	-0.107492	10	74023752	F	II		IGR	shelf	IGR-shelf	chr10:74020773-74021023
cg19250639	0.100127	0.679345	3.6545	0.00229199	0.181782	-2.01464	0.710634	0.610507	-0.100127	1	39281166	F	II		IGR	shelf	IGR-shelf	chr1:39283609-39284576
cg26494610	0.111145	0.819121	3.65425	0.00229316	0.181782	-2.01514	0.853854	0.742709	-0.111145	2	240658469	R	II		IGR	opensea	IGR-opensea
cg25478299	-0.113151	0.785511	-3.65348	0.00229684	0.181875	-2.01673	0.750152	0.863303	0.113151	11	102638669	R	II		IGR	opensea	IGR-opensea
cg14108909	0.139041	0.513608	3.65308	0.00229876	0.181875	-2.01756	0.557059	0.418017	-0.139041	9	138109322	R	II		IGR	opensea	IGR-opensea			TRUE
cg21051519	-0.133468	0.106201	-3.65255	0.00230127	0.181942	-2.01865	0.0644917	0.19796	0.133468	5	137225191	R	I	PKD2L2	1stExon	island	1stExon-island	chr5:137224986-137225477	TRUE
cg10784341	0.118283	0.694467	3.65213	0.00230323	0.181957	-2.01949	0.73143	0.613148	-0.118283	6	143929300	F	II	PHACTR2	TSS200	opensea	TSS200-opensea			TRUE
cg10406360	0.121073	0.875544	3.65183	0.00230468	0.181957	-2.02012	0.91338	0.792307	-0.121073	10	134529052	F	II	INPP5A	Body	shore	Body-shore	chr10:134527742-134528091		TRUE
cg21856234	-0.173444	0.0725336	-3.65125	0.00230747	0.181957	-2.02131	0.0183324	0.191776	0.173444	6	42750452	R	I		IGR	island	IGR-island	chr6:42750449-42751432
cg13874498	0.106709	0.589432	3.65098	0.00230871	0.181957	-2.02185	0.622779	0.51607	-0.106709	9	132247010	R	II		IGR	shore	IGR-shore	chr9:132244401-132245732
cg08929399	0.123026	0.676441	3.65042	0.0023114	0.181957	-2.023	0.714887	0.59186	-0.123026	3	151778972	R	II		IGR	opensea	IGR-opensea			TRUE
cg12008501	0.100273	0.8533	3.6502	0.00231247	0.182006	-2.02346	0.884635	0.784362	-0.100273	2	208678058	R	II		IGR	opensea	IGR-opensea			TRUE
cg14602234	0.119139	0.700614	3.64961	0.00231527	0.182032	-2.02466	0.737845	0.618706	-0.119139	9	137884872	R	II		IGR	opensea	IGR-opensea
cg17064090	-0.107865	0.173876	-3.64929	0.00231681	0.182032	-2.02532	0.140169	0.248034	0.107865	11	69264679	R	II		IGR	opensea	IGR-opensea		TRUE	TRUE
cg24716152	0.104155	0.528792	3.64784	0.00232377	0.182053	-2.02829	0.56134	0.457185	-0.104155	4	23879965	R	II	PPARGC1A	Body	opensea	Body-opensea			TRUE
cg25558288	0.104525	0.589736	3.64734	0.00232617	0.182097	-2.02932	0.6224	0.517875	-0.104525	11	129145299	R	II		IGR	shelf	IGR-shelf	chr11:129148497-129149917					rs61912962
cg19969694	0.111577	0.616586	3.64705	0.00232755	0.182171	-2.02991	0.651454	0.539876	-0.111577	15	41185800	F	I	VPS18	TSS1500	shore	TSS1500-shore	chr15:41186255-41187169
cg08468401	0.103756	0.22176	3.64595	0.00233285	0.182288	-2.03216	0.254184	0.150428	-0.103756	3	14303131	R	II		IGR	opensea	IGR-opensea			TRUE
cg05782106	-0.129761	0.20645	-3.64593	0.00233295	0.182288	-2.0322	0.1659	0.295661	0.129761	X	9754927	F	I	SHROOM2	Body	island	Body-island	chrX:9753566-9755101	TRUE
cg11544522	-0.110712	0.483252	-3.64564	0.00233434	0.182302	-2.03279	0.448654	0.559366	0.110712	15	70828097	F	II		IGR	opensea	IGR-opensea			TRUE
cg09427374	0.113088	0.826767	3.64477	0.00233855	0.182402	-2.03458	0.862107	0.749019	-0.113088	2	86095320	R	II	ST3GAL5	TSS1500	opensea	TSS1500-opensea
cg05460318	-0.171051	0.250235	-3.64428	0.0023409	0.182463	-2.03558	0.196781	0.367832	0.171051	1	232941530	F	I	KIAA1383	1stExon	island	1stExon-island	chr1:232941054-232941707	TRUE	TRUE		rs3766498
cg05522011	0.102232	0.831689	3.64384	0.00234304	0.182463	-2.03648	0.863636	0.761404	-0.102232	4	81122726	R	I	PRDM8	Body	shore	Body-shore	chr4:81123508-81124318	TRUE
cg01898377	0.116766	0.820511	3.64379	0.00234328	0.182463	-2.03659	0.857	0.740234	-0.116766	20	48960272	R	I		IGR	island	IGR-island	chr20:48960164-48960373
cg05689208	0.129267	0.798179	3.64353	0.00234452	0.182463	-2.03711	0.838575	0.709307	-0.129267	8	49496391	R	I		IGR	opensea	IGR-opensea
cg04026887	0.108839	0.56737	3.64192	0.00235233	0.182779	-2.04041	0.601382	0.492543	-0.108839	6	150462309	R	II		IGR	shore	IGR-shore	chr6:150463771-150465002
cg09643139	0.157288	0.595013	3.64064	0.00235858	0.182966	-2.04304	0.644165	0.486878	-0.157288	8	59746288	R	II	TOX	Body	opensea	Body-opensea			TRUE
cg26175661	0.103202	0.472683	3.64026	0.00236042	0.183008	-2.04382	0.504933	0.401731	-0.103202	X	114826443	R	II	PLS3	5'UTR	opensea	5'UTR-opensea			TRUE
cg03221247	-0.143437	0.151755	-3.63932	0.00236504	0.183062	-2.04575	0.106931	0.250367	0.143437	1	219347458	F	I	LYPLAL1	Body	island	Body-island	chr1:219347109-219347572	TRUE
cg15413269	0.115771	0.786875	3.63877	0.00236772	0.183097	-2.04688	0.823054	0.707283	-0.115771	8	106784011	R	II	ZFPM2	Body	opensea	Body-opensea			TRUE
cg14454127	0.109094	0.580933	3.63851	0.00236898	0.183097	-2.0474	0.615025	0.505931	-0.109094	5	399787	F	I	AHRR	Body	opensea	Body-opensea		TRUE	TRUE
cg13453589	0.111442	0.77402	3.63823	0.00237036	0.183171	-2.04798	0.808846	0.697404	-0.111442	9	33850099	F	II	UBE2R2	Body	opensea	Body-opensea			TRUE
cg25885042	0.148704	0.712982	3.63779	0.0023725	0.183269	-2.04888	0.759452	0.610748	-0.148704	2	59477248	R	II		IGR	opensea	IGR-opensea			TRUE
cg14107822	0.102024	0.802968	3.63756	0.00237365	0.183282	-2.04935	0.83485	0.732826	-0.102024	6	134712773	R	II		IGR	opensea	IGR-opensea			TRUE
cg22879111	0.13118	0.675531	3.63682	0.00237724	0.183433	-2.05085	0.716525	0.585345	-0.13118	5	149923998	F	II	NDST1	Body	opensea	Body-opensea			TRUE
cg07166171	0.104068	0.53556	3.63639	0.00237935	0.183484	-2.05173	0.568081	0.464013	-0.104068	15	94346817	F	I		IGR	opensea	IGR-opensea						rs28663647
cg26735478	0.156868	0.76992	3.63502	0.00238609	0.183645	-2.05454	0.818941	0.662073	-0.156868	17	79694557	F	II		IGR	opensea	IGR-opensea					rs9894381
cg22081371	-0.178016	0.202286	-3.63387	0.0023918	0.183744	-2.05691	0.146656	0.324673	0.178016	1	177827903	R	II		IGR	opensea	IGR-opensea			TRUE
cg25416153	-0.131131	0.156019	-3.63309	0.00239565	0.183829	-2.0585	0.11504	0.246172	0.131131	18	43355414	F	I		IGR	island	IGR-island	chr18:43355318-43355698		TRUE		rs1620781
cg05002336	0.108499	0.840752	3.63282	0.00239699	0.183858	-2.05906	0.874658	0.766159	-0.108499	11	2397562	R	II	CD81	TSS1500	shore	TSS1500-shore	chr11:2398223-2399598
cg21400640	-0.100078	0.506648	-3.63215	0.00240029	0.183858	-2.06042	0.475373	0.575452	0.100078	X	12992967	R	II	TMSL3	TSS1500	shore	TSS1500-shore	chrX:12993107-12994599	TRUE
cg16113156	0.12253	0.499227	3.63185	0.00240181	0.183858	-2.06105	0.537518	0.414988	-0.12253	18	76266265	F	I		IGR	island	IGR-island	chr18:76266230-76266453		TRUE			rs73497530
cg22531266	0.113273	0.579732	3.63144	0.00240381	0.183858	-2.06187	0.61513	0.501856	-0.113273	1	222278177	F	II		IGR	opensea	IGR-opensea			TRUE
cg11152263	0.118113	0.841668	3.62954	0.00241331	0.184189	-2.06578	0.878578	0.760465	-0.118113	7	569642	F	II		IGR	shore	IGR-shore	chr7:569812-570042				rs34042795	rs62433874
cg10003961	0.103535	0.639347	3.62943	0.00241386	0.18419	-2.06601	0.671702	0.568167	-0.103535	6	168293749	F	II	MLLT4	Body	opensea	Body-opensea			TRUE
cg04585435	0.107404	0.860897	3.6289	0.00241649	0.184191	-2.06709	0.89446	0.787056	-0.107404	17	4211943	R	II	UBE2G1	Body	opensea	Body-opensea			TRUE
cg15392819	0.104404	0.832602	3.6286	0.00241798	0.184191	-2.0677	0.865228	0.760824	-0.104404	1	180585679	F	II		IGR	opensea	IGR-opensea			TRUE		rs75646563	rs80265677
cg04546573	0.136468	0.521739	3.628	0.00242098	0.184197	-2.06893	0.564385	0.427917	-0.136468	2	189198567	R	II	GULP1	5'UTR	opensea	5'UTR-opensea			TRUE
cg11147886	-0.120435	0.709915	-3.62768	0.00242258	0.184215	-2.06958	0.672279	0.792714	0.120435	16	69598170	R	II	NFAT5	TSS1500	shore	TSS1500-shore	chr16:69599437-69600736
cg18803104	-0.159706	0.308277	-3.62696	0.0024262	0.184215	-2.07106	0.258369	0.418075	0.159706	6	28956324	F	I		IGR	island	IGR-island	chr6:28956106-28956578				rs10698716
cg15017119	0.131381	0.622249	3.62678	0.00242707	0.184215	-2.07142	0.663306	0.531925	-0.131381	13	82585793	R	II		IGR	opensea	IGR-opensea			TRUE
cg06630771	0.113361	0.564851	3.62609	0.00243053	0.184215	-2.07283	0.600276	0.486915	-0.113361	12	24913804	F	II		IGR	opensea	IGR-opensea			TRUE
cg05633523	0.142376	0.491588	3.62555	0.00243326	0.184215	-2.07394	0.53608	0.393704	-0.142376	15	102156835	F	I		IGR	opensea	IGR-opensea			TRUE		rs72761618
cg26893134	0.117459	0.544312	3.62398	0.00244119	0.184378	-2.07717	0.581018	0.463559	-0.117459	6	116381904	R	II	FRK	1stExon	opensea	1stExon-opensea			TRUE
cg09980771	0.100469	0.592119	3.62379	0.00244212	0.184414	-2.07754	0.623516	0.523046	-0.100469	17	54230787	R	II	ANKFN1	TSS200	opensea	TSS200-opensea
cg16481618	0.101959	0.476117	3.62295	0.00244635	0.184552	-2.07926	0.507979	0.40602	-0.101959	17	64225731	F	II	APOH	TSS200	opensea	TSS200-opensea
cg05859267	0.102909	0.726279	3.62256	0.00244834	0.184552	-2.08007	0.758438	0.655528	-0.102909	16	77469667	F	II	ADAMTS18	TSS1500	shore	TSS1500-shore	chr16:77468309-77469074				rs62043630
cg24928181	0.112848	0.819775	3.62102	0.00245612	0.184552	-2.08321	0.85504	0.742192	-0.112848	2	151424835	R	II		IGR	opensea	IGR-opensea			TRUE
cg04058837	0.137915	0.640311	3.62062	0.00245818	0.184552	-2.08404	0.68341	0.545494	-0.137915	3	69732819	R	II		IGR	opensea	IGR-opensea			TRUE			rs79084514
cg15369821	-0.105008	0.107577	-3.62049	0.00245885	0.184552	-2.08431	0.0747617	0.17977	0.105008	6	164281903	F	II		IGR	opensea	IGR-opensea			TRUE
cg16032841	-0.113384	0.481796	-3.62027	0.00245995	0.184556	-2.08475	0.446363	0.559747	0.113384	13	111522222	F	II	C13orf29	Body	opensea	Body-opensea		TRUE	TRUE		rs2277425
cg00685614	0.138876	0.708188	3.62006	0.00246102	0.184556	-2.08519	0.751587	0.612711	-0.138876	16	89118838	F	I		IGR	island	IGR-island	chr16:89118801-89119152
cg16421411	0.106224	0.785322	3.61853	0.00246879	0.184735	-2.08831	0.818517	0.712293	-0.106224	2	10302391	F	I	C2orf48	Body	opensea	Body-opensea		TRUE			rs16855898
cg22745102	0.106092	0.409463	3.61835	0.00246973	0.184735	-2.08869	0.442617	0.336525	-0.106092	19	50931616	F	II	SPIB	3'UTR	island	3'UTR-island	chr19:50931270-50931638	TRUE
cg08123444	0.120658	0.474796	3.6182	0.00247049	0.184735	-2.08899	0.512502	0.391843	-0.120658	2	9833101	F	I		IGR	opensea	IGR-opensea		TRUE	TRUE		rs79671850
cg24718756	-0.103107	0.3649	-3.61812	0.00247089	0.184735	-2.08915	0.332679	0.435787	0.103107	5	126308095	F	II	2025-03-03	5'UTR	opensea	5'UTR-opensea			TRUE
cg08058560	-0.146743	0.662484	-3.61735	0.00247484	0.184788	-2.09074	0.616627	0.76337	0.146743	1	117544206	R	II	CD101	TSS200	opensea	TSS200-opensea
cg14498722	0.116221	0.737877	3.61656	0.00247891	0.184788	-2.09236	0.774196	0.657975	-0.116221	6	27034685	R	II		IGR	opensea	IGR-opensea			TRUE
cg08371140	0.118327	0.25235	3.61634	0.00248	0.184788	-2.0928	0.289327	0.171	-0.118327	10	36738505	R	II		IGR	opensea	IGR-opensea			TRUE
cg26323797	-0.122754	0.308649	-3.6144	0.00248998	0.184881	-2.09678	0.270288	0.393042	0.122754	X	53461386	R	I	HSD17B10	TSS200	island	TSS200-island	chrX:53461178-53461463
cg06670039	0.163338	0.823333	3.6129	0.0024977	0.184995	-2.09985	0.874376	0.711038	-0.163338	16	12530246	R	I	SNX29	Body	opensea	Body-opensea			TRUE
cg10608166	0.104588	0.684137	3.61208	0.00250193	0.184995	-2.10153	0.716821	0.612233	-0.104588	12	115887445	R	II		IGR	shelf	IGR-shelf	chr12:115889597-115889995		TRUE
cg07578108	0.101376	0.644873	3.61148	0.00250506	0.184995	-2.10276	0.676553	0.575177	-0.101376	4	170897214	F	II		IGR	opensea	IGR-opensea			TRUE
cg12317815	0.123744	0.28835	3.61111	0.00250698	0.184995	-2.10352	0.32702	0.203276	-0.123744	17	3379283	F	II	ASPA	TSS200	opensea	TSS200-opensea			TRUE		rs55859596
cg08129583	-0.112963	0.4369	-3.61031	0.00251109	0.184995	-2.10514	0.401599	0.514562	0.112963	2	127413367	F	II	GYPC	TSS1500	shore	TSS1500-shore	chr2:127413696-127414171	TRUE
cg19568115	0.120937	0.386101	3.61012	0.00251207	0.184995	-2.10553	0.423894	0.302957	-0.120937	14	70830156	R	II		IGR	shelf	IGR-shelf	chr14:70826255-70826580
cg10244340	-0.116162	0.17802	-3.60911	0.00251734	0.184995	-2.10761	0.141719	0.257881	0.116162	20	9487688	F	I		IGR	island	IGR-island	chr20:9487111-9487889				rs55679221
cg11713658	-0.153643	0.222434	-3.60892	0.00251833	0.184995	-2.108	0.17442	0.328063	0.153643	4	148652434	R	II	ARHGAP10	TSS1500	shore	TSS1500-shore	chr4:148652848-148653918
cg00377332	0.12021	0.768739	3.60843	0.00252087	0.184995	-2.109	0.806305	0.686095	-0.12021	3	45761250	F	II	SACM1L	Body	opensea	Body-opensea			TRUE
cg05630800	0.149787	0.436205	3.60836	0.00252125	0.184995	-2.10915	0.483013	0.333226	-0.149787	1	178840298	R	II	ANGPTL1	TSS200	opensea	TSS200-opensea
cg24901042	-0.12036	0.232806	-3.60818	0.00252217	0.184995	-2.10951	0.195193	0.315554	0.12036	21	42880554	R	II	TMPRSS2	TSS1500	island	TSS1500-island	chr21:42878751-42880674
cg04433051	-0.107635	0.204651	-3.60766	0.0025249	0.184995	-2.11058	0.171015	0.27865	0.107635	17	48758651	R	II	ABCC3	Body	opensea	Body-opensea		TRUE	TRUE
cg18030133	0.122062	0.742307	3.60692	0.00252878	0.185025	-2.1121	0.780452	0.65839	-0.122062	6	143929406	F	II	PHACTR2	5'UTR	opensea	5'UTR-opensea			TRUE		rs41285023
cg01597947	-0.112697	0.546159	-3.60689	0.00252892	0.185025	-2.11216	0.510941	0.623638	0.112697	X	39870568	F	II		IGR	shore	IGR-shore	chrX:39871532-39874766				rs9699191
cg25004838	0.100858	0.531064	3.60593	0.00253397	0.185089	-2.11413	0.562582	0.461724	-0.100858	6	32112189	F	I		IGR	opensea	IGR-opensea
cg14593191	0.140933	0.550476	3.60588	0.00253419	0.185089	-2.11422	0.594517	0.453584	-0.140933	11	35201133	R	II	CD44	Body	opensea	Body-opensea			TRUE
cg18378551	0.113869	0.56748	3.60441	0.00254189	0.185225	-2.11722	0.603064	0.489195	-0.113869	11	84844436	F	II	DLG2	Body	opensea	Body-opensea			TRUE
cg00451397	0.115999	0.58955	3.60422	0.0025429	0.185225	-2.11762	0.6258	0.509801	-0.115999	2	48843645	F	II	GTF2A1L	TSS1500	shore	TSS1500-shore	chr2:48844751-48844985
cg11956467	0.106763	0.843491	3.60338	0.00254735	0.185272	-2.11935	0.876855	0.770091	-0.106763	4	186742139	R	II	SORBS2	5'UTR	opensea	5'UTR-opensea			TRUE
cg19545933	0.122268	0.780327	3.60235	0.00255278	0.185362	-2.12146	0.818536	0.696267	-0.122268	15	81028959	R	II	FAM108C1	Body	opensea	Body-opensea			TRUE
cg24746938	0.101077	0.485544	3.60202	0.00255451	0.185393	-2.12213	0.517131	0.416054	-0.101077	2	225543274	F	II		IGR	opensea	IGR-opensea			TRUE
cg14668981	0.110632	0.722937	3.60199	0.00255465	0.185393	-2.12218	0.75751	0.646878	-0.110632	3	133112774	F	II	TMEM108	Body	opensea	Body-opensea			TRUE		rs74707458
cg18397517	0.123092	0.632634	3.60165	0.00255645	0.18546	-2.12288	0.6711	0.548009	-0.123092	14	95048035	F	II	SERPINA5	5'UTR	opensea	5'UTR-opensea			TRUE
cg18107094	-0.114051	0.43397	-3.59959	0.00256736	0.185555	-2.1271	0.398329	0.51238	0.114051	8	110020924	F	II		IGR	opensea	IGR-opensea
cg18208185	0.128794	0.612186	3.5994	0.00256835	0.185555	-2.12748	0.652434	0.52364	-0.128794	10	45169265	R	II		IGR	opensea	IGR-opensea			TRUE
cg00078259	0.113373	0.755612	3.59923	0.00256929	0.185558	-2.12784	0.791041	0.677668	-0.113373	6	2656232	F	II		IGR	opensea	IGR-opensea			TRUE
cg26393015	-0.113636	0.0797153	-3.59906	0.00257016	0.185558	-2.12818	0.0442039	0.15784	0.113636	7	128809301	R	I		IGR	island	IGR-island	chr7:128809089-128809393	TRUE	TRUE
cg23155944	0.11909	0.548031	3.59748	0.00257855	0.185691	-2.13141	0.585247	0.466157	-0.11909	6	86307053	R	II		IGR	shelf	IGR-shelf	chr6:86303113-86304061
cg13491317	0.127008	0.687726	3.59588	0.00258712	0.185691	-2.1347	0.727416	0.600408	-0.127008	2	73399765	R	II		IGR	shelf	IGR-shelf	chr2:73402638-73404802
cg01055868	0.1248	0.807119	3.5956	0.00258861	0.185691	-2.13527	0.846119	0.72132	-0.1248	3	71307284	F	II	FOXP1	5'UTR	opensea	5'UTR-opensea			TRUE
cg24442978	0.109005	0.746618	3.59451	0.00259444	0.185738	-2.13749	0.780681	0.671677	-0.109005	12	119895394	R	II	CCDC60	Body	opensea	Body-opensea			TRUE
cg21182108	0.138862	0.609	3.5926	0.00260474	0.185966	-2.14142	0.652395	0.513533	-0.138862	9	101553307	R	I	ANKS6	Body	opensea	Body-opensea			TRUE
cg08661470	0.105134	0.793663	3.59255	0.00260496	0.185966	-2.1415	0.826518	0.721384	-0.105134	4	1556833	R	II		IGR	shore	IGR-shore	chr4:1557561-1557772
cg13930261	-0.120401	0.204419	-3.59232	0.00260624	0.185966	-2.14199	0.166794	0.287195	0.120401	5	42949882	R	II		IGR	shore	IGR-shore	chr5:42951076-42952410					rs78446496
cg19463976	-0.143889	0.167456	-3.59221	0.00260681	0.185966	-2.1422	0.122491	0.26638	0.143889	6	27173633	R	II		IGR	opensea	IGR-opensea
cg09923656	0.124853	0.80175	3.59219	0.00260693	0.185966	-2.14225	0.840767	0.715914	-0.124853	13	42857965	F	II	AKAP11	5'UTR	opensea	5'UTR-opensea			TRUE
cg25805837	0.131228	0.844737	3.59082	0.00261434	0.186129	-2.14506	0.885746	0.754518	-0.131228	10	130935371	F	II		IGR	opensea	IGR-opensea
cg09184899	0.107109	0.865922	3.59053	0.0026159	0.186208	-2.14565	0.899393	0.792285	-0.107109	8	42234243	R	I	DKK4	Body	opensea	Body-opensea			TRUE
cg12406391	-0.124503	0.252106	-3.59034	0.0026169	0.186235	-2.14603	0.213198	0.337702	0.124503	1	6520194	F	I	ESPN	Body	shore	Body-shore	chr1:6520584-6521955	TRUE
cg04308089	-0.16558	0.229761	-3.59023	0.00261749	0.186235	-2.14625	0.178017	0.343597	0.16558	15	96869027	R	II	NR2F2	TSS200	shelf	TSS200-shelf	chr15:96864881-96866787		TRUE
cg02609337	-0.137295	0.63584	-3.58956	0.00262114	0.186347	-2.14763	0.592936	0.73023	0.137295	8	134559320	F	II	ST3GAL1	5'UTR	opensea	5'UTR-opensea			TRUE		rs3758105
cg07611933	0.1051	0.805765	3.58903	0.002624	0.186347	-2.14871	0.838609	0.733509	-0.1051	16	2773245	R	II		IGR	shore	IGR-shore	chr16:2771081-2771365
cg27031484	0.117298	0.701106	3.5887	0.00262581	0.186347	-2.1494	0.737761	0.620463	-0.117298	7	129502834	F	II	UBE2H	Body	opensea	Body-opensea			TRUE
cg12120359	0.108508	0.520821	3.5883	0.00262795	0.186385	-2.1502	0.55473	0.446221	-0.108508	14	65006041	R	II	HSPA2	TSS1500	shore	TSS1500-shore	chr14:65006874-65009197
cg03789645	-0.16656	0.103955	-3.58644	0.00263811	0.186648	-2.15402	0.0519047	0.218465	0.16656	7	148394842	R	II	CUL1	TSS1500	shore	TSS1500-shore	chr7:148395430-148397002					rs6959365
cg26624794	0.108299	0.804756	3.58574	0.0026419	0.186648	-2.15544	0.8386	0.730301	-0.108299	5	172332685	F	I	ERGIC1	Body	opensea	Body-opensea			TRUE		rs76189308
cg03445151	0.156423	0.486013	3.58559	0.0026427	0.186648	-2.15574	0.534895	0.378472	-0.156423	2	23516881	F	I		IGR	opensea	IGR-opensea			TRUE		rs28681156
cg04190037	0.131478	0.730792	3.58555	0.00264295	0.186648	-2.15584	0.771879	0.640401	-0.131478	13	113105962	R	II		IGR	shore	IGR-shore	chr13:113106337-113106544
cg17921080	0.119142	0.50611	3.58524	0.00264462	0.186648	-2.15646	0.543342	0.4242	-0.119142	14	86478932	R	II		IGR	opensea	IGR-opensea			TRUE
cg05433642	-0.11667	0.380209	-3.5843	0.00264978	0.186827	-2.15839	0.34375	0.46042	0.11667	13	97873992	F	II	MBNL2	TSS1500	opensea	TSS1500-opensea
cg10295858	0.14585	0.701329	3.58352	0.00265404	0.187025	-2.15998	0.746907	0.601057	-0.14585	16	411352	R	I		IGR	island	IGR-island	chr16:409984-411491
cg17886420	0.115185	0.451836	3.58156	0.00266482	0.187203	-2.16399	0.487831	0.372646	-0.115185	10	1796742	R	II		IGR	opensea	IGR-opensea
cg02025737	0.171169	0.523826	3.58039	0.00267127	0.187203	-2.16639	0.577316	0.406147	-0.171169	15	33384751	F	I		IGR	opensea	IGR-opensea			TRUE
cg13115952	0.116141	0.701029	3.5803	0.00267177	0.187203	-2.16657	0.737323	0.621182	-0.116141	8	55356479	F	II		IGR	opensea	IGR-opensea			TRUE
cg16566400	-0.20402	0.33417	-3.57885	0.00267982	0.187251	-2.16955	0.270414	0.474434	0.20402	11	119293869	F	I	THY1	1stExon	island	1stExon-island	chr11:119293320-119293943	TRUE			rs55933700
cg15400101	0.118504	0.710414	3.57847	0.00268188	0.187251	-2.17031	0.747447	0.628943	-0.118504	4	82348507	F	II	RASGEF1B	3'UTR	opensea	3'UTR-opensea			TRUE
cg08924430	-0.185289	0.280449	-3.57733	0.00268825	0.187251	-2.17266	0.222546	0.407835	0.185289	4	106067052	F	II	TET2	TSS1500	shore	TSS1500-shore	chr4:106067473-106067968
cg27125849	0.111111	0.21867	3.57722	0.00268884	0.187251	-2.17288	0.253392	0.142281	-0.111111	17	59473674	F	I		IGR	island	IGR-island	chr17:59473060-59483266
cg14301844	0.100447	0.864861	3.57651	0.00269277	0.187251	-2.17433	0.89625	0.795803	-0.100447	14	100904721	F	II	WDR25	Body	opensea	Body-opensea			TRUE
cg02886375	0.114248	0.717168	3.57637	0.00269359	0.187251	-2.17463	0.75287	0.638622	-0.114248	8	1244286	R	I		IGR	shore	IGR-shore	chr8:1245671-1246464
cg19692710	0.10444	0.627193	3.57607	0.00269522	0.187251	-2.17523	0.659831	0.555391	-0.10444	11	73661920	R	II	DNAJB13	1stExon	opensea	1stExon-opensea		TRUE			rs73543099
cg23430066	0.106371	0.841948	3.57566	0.00269755	0.187251	-2.17608	0.875189	0.768818	-0.106371	8	11618677	R	II		IGR	opensea	IGR-opensea
cg24268495	0.118474	0.765021	3.57553	0.00269823	0.187251	-2.17633	0.802044	0.68357	-0.118474	18	76497986	R	II		IGR	opensea	IGR-opensea
cg20038070	0.109436	0.438448	3.5749	0.00270176	0.187251	-2.17762	0.472647	0.363211	-0.109436	4	4482826	R	II	STX18	Body	opensea	Body-opensea			TRUE
cg20252015	0.103225	0.882931	3.57418	0.00270577	0.187314	-2.17909	0.915189	0.811964	-0.103225	1	64100814	F	II	PGM1	Body	opensea	Body-opensea			TRUE
cg07568015	0.1004	0.831737	3.57319	0.00271135	0.187428	-2.18113	0.863112	0.762712	-0.1004	11	13367266	F	II	ARNTL	5'UTR	opensea	5'UTR-opensea			TRUE
cg02668694	0.171172	0.541377	3.57243	0.00271559	0.187452	-2.18268	0.594868	0.423696	-0.171172	17	26369539	R	II	NLK	TSS200	shore	TSS200-shore	chr17:26368586-26369133
cg25610515	-0.139557	0.309385	-3.56995	0.00272954	0.187615	-2.18775	0.265773	0.40533	0.139557	1	23495577	R	I	LUZP1	TSS1500	opensea	TSS1500-opensea		TRUE
cg20198242	0.234358	0.229773	3.5695	0.00273207	0.187615	-2.18867	0.30301	0.0686522	-0.234358	6	29855110	R	II	HLA-H	TSS1500	shore	TSS1500-shore	chr6:29855295-29856565
cg04366880	0.123029	0.780556	3.56919	0.00273386	0.187615	-2.18931	0.819003	0.695974	-0.123029	10	93431680	F	II		IGR	opensea	IGR-opensea			TRUE
cg00526069	0.114506	0.849461	3.56823	0.00273926	0.187615	-2.19127	0.885245	0.770739	-0.114506	6	164436319	F	II		IGR	opensea	IGR-opensea			TRUE
cg04080282	-0.118324	0.287028	-3.56819	0.00273952	0.187615	-2.19136	0.250052	0.368376	0.118324	7	95026106	R	I	PON3	TSS1500	island	TSS1500-island	chr7:95025559-95026122
cg15028899	0.104211	0.524633	3.56798	0.00274069	0.187615	-2.19178	0.557199	0.452988	-0.104211	11	120275443	F	II	ARHGEF12	Body	opensea	Body-opensea			TRUE
cg02887254	0.134955	0.63751	3.56783	0.00274152	0.187615	-2.19208	0.679684	0.544728	-0.134955	13	61165504	F	II		IGR	opensea	IGR-opensea			TRUE		rs11148502
cg13213799	0.11926	0.695646	3.56748	0.00274352	0.187615	-2.1928	0.732915	0.613655	-0.11926	14	104834222	F	II		IGR	opensea	IGR-opensea
cg16564132	0.124638	0.808344	3.56633	0.00275007	0.187615	-2.19517	0.847293	0.722656	-0.124638	7	47193871	R	II		IGR	opensea	IGR-opensea			TRUE
cg26952803	0.139863	0.544531	3.56608	0.00275146	0.187615	-2.19566	0.588238	0.448375	-0.139863	10	63926610	F	II		IGR	opensea	IGR-opensea			TRUE
cg04547002	0.11634	0.409326	3.56528	0.00275605	0.187615	-2.19731	0.445682	0.329342	-0.11634	5	122551801	F	II		IGR	opensea	IGR-opensea			TRUE		rs74560516
cg20137991	0.125102	0.699241	3.56497	0.00275777	0.187615	-2.19793	0.738335	0.613233	-0.125102	4	79971432	R	I		IGR	opensea	IGR-opensea
cg04117801	0.102173	0.662254	3.56412	0.00276261	0.187653	-2.19967	0.694183	0.59201	-0.102173	17	46651867	R	I	HOXB3	TSS200	shelf	TSS200-shelf	chr17:46654053-46654369
cg07207043	0.100154	0.62421	3.56382	0.00276438	0.187653	-2.2003	0.655508	0.555354	-0.100154	6	7051497	R	II		IGR	island	IGR-island	chr6:7051496-7052932	TRUE
cg03783110	0.115826	0.554614	3.56348	0.0027663	0.187653	-2.20099	0.59081	0.474983	-0.115826	17	1463739	F	I	PITPNA	Body	shore	Body-shore	chr17:1465159-1466312		TRUE
cg08165083	0.112998	0.62062	3.56344	0.00276651	0.187653	-2.20106	0.655932	0.542934	-0.112998	1	10589400	F	I	PEX14	Body	opensea	Body-opensea			TRUE
cg20587236	0.100634	0.377078	3.56328	0.00276747	0.187653	-2.20141	0.408527	0.307892	-0.100634	12	109900956	F	II	KCTD10	Body	opensea	Body-opensea		TRUE	TRUE		rs10160889
cg24815529	-0.109664	0.111898	-3.56279	0.00277023	0.187653	-2.20239	0.077628	0.187292	0.109664	19	55592342	R	II	EPS8L1	Body	island	Body-island	chr19:55591905-55593980		TRUE
cg01649879	0.117192	0.517315	3.56252	0.00277177	0.187653	-2.20294	0.553937	0.436745	-0.117192	13	112507773	F	II		IGR	opensea	IGR-opensea			TRUE
cg19159365	-0.11282	0.218979	-3.56116	0.00277959	0.187854	-2.20573	0.183723	0.296543	0.11282	1	67218505	R	II	TCTEX1D1	5'UTR	shore	5'UTR-shore	chr1:67218079-67218293		TRUE
cg03944375	0.118495	0.600362	3.56056	0.00278304	0.187902	-2.20696	0.637392	0.518897	-0.118495	1	22143533	F	II	LDLRAD2	Body	shelf	Body-shelf	chr1:22140891-22141407	TRUE
cg09217898	0.140294	0.46214	3.56023	0.00278493	0.187969	-2.20763	0.505982	0.365688	-0.140294	3	194412522	F	II		IGR	shelf	IGR-shelf	chr3:194406440-194409045
cg24311485	0.110431	0.76345	3.55975	0.00278773	0.188038	-2.20862	0.79796	0.687529	-0.110431	7	73181157	R	II		IGR	shelf	IGR-shelf	chr7:73183379-73185115
cg07177661	0.12731	0.808505	3.55834	0.00279584	0.188067	-2.2115	0.848289	0.720979	-0.12731	15	101401725	F	II		IGR	opensea	IGR-opensea
cg15646123	0.138804	0.811069	3.55769	0.00279958	0.188067	-2.21282	0.854445	0.715641	-0.138804	6	20954499	F	II	CDKAL1	Body	opensea	Body-opensea			TRUE
cg20490341	0.110234	0.849857	3.55693	0.00280402	0.188067	-2.21439	0.884305	0.774071	-0.110234	8	144549532	R	II	ZC3H3	Body	shelf	Body-shelf	chr8:144552580-144552787		TRUE
cg22012583	-0.111645	0.72124	-3.55539	0.00281296	0.188067	-2.21754	0.686351	0.797996	0.111645	1	150947949	F	II	LASS2	TSS1500	island	TSS1500-island	chr1:150946496-150947950
cg11503671	0.108446	0.594438	3.55477	0.00281653	0.188067	-2.21879	0.628327	0.519881	-0.108446	X	2745940	R	II	GYG2	TSS1500	shore	TSS1500-shore	chrX:2746553-2748235
cg26531231	0.114711	0.620535	3.55446	0.00281837	0.188067	-2.21944	0.656382	0.541671	-0.114711	4	40336255	R	II	CHRNA9	TSS1500	opensea	TSS1500-opensea		TRUE	TRUE
cg14201606	0.115963	0.799386	3.55436	0.00281896	0.188067	-2.21965	0.835624	0.719661	-0.115963	22	37827780	F	II		IGR	shelf	IGR-shelf	chr22:37823011-37824119	TRUE	TRUE
cg13952840	-0.141501	0.239314	-3.55405	0.00282075	0.188067	-2.22027	0.195095	0.336596	0.141501	9	136114300	R	II		IGR	opensea	IGR-opensea		TRUE	TRUE
cg18015035	-0.148525	0.403671	-3.55365	0.0028231	0.188067	-2.2211	0.357257	0.505782	0.148525	X	19002577	F	I	PHKA2	TSS200	island	TSS200-island	chrX:19002003-19003244			high-CpG:18912347-18913029
cg21058511	0.100997	0.69557	3.55031	0.00284262	0.188342	-2.22791	0.727132	0.626135	-0.100997	12	63144886	R	II	PPM1H	Body	opensea	Body-opensea			TRUE
cg15108047	0.111129	0.796673	3.55015	0.00284355	0.188361	-2.22824	0.831401	0.720272	-0.111129	20	19742828	R	II		IGR	shelf	IGR-shelf	chr20:19738039-19739773
cg25639084	0.114014	0.417197	3.54948	0.00284752	0.188403	-2.22962	0.452826	0.338813	-0.114014	13	24133513	F	II		IGR	opensea	IGR-opensea		TRUE	TRUE
cg14503815	0.105151	0.792989	3.54849	0.00285334	0.188468	-2.23164	0.825849	0.720698	-0.105151	9	96674333	R	II		IGR	opensea	IGR-opensea			TRUE
cg23210296	0.109323	0.839682	3.54828	0.00285457	0.188468	-2.23206	0.873846	0.764523	-0.109323	10	122562489	R	II		IGR	opensea	IGR-opensea			TRUE
cg14775960	0.103402	0.614003	3.54826	0.00285471	0.188468	-2.23212	0.646317	0.542914	-0.103402	3	126854109	R	II		IGR	island	IGR-island	chr3:126854106-126854848
cg02713960	0.115003	0.248677	3.54665	0.00286422	0.188593	-2.2354	0.284616	0.169613	-0.115003	16	746048	R	II	FBXL16	Body	shore	Body-shore	chr16:743924-745943	TRUE
cg05441628	0.11166	0.8616	3.54521	0.00287278	0.188929	-2.23835	0.896494	0.784833	-0.11166	18	271673	F	II		IGR	shelf	IGR-shelf	chr18:267710-268382					rs74492276
cg16953031	0.103398	0.812664	3.54454	0.00287675	0.189012	-2.23972	0.844976	0.741578	-0.103398	3	175064540	F	II	NAALADL2	Body	opensea	Body-opensea			TRUE
cg14925764	0.127915	0.525915	3.54432	0.00287805	0.18903	-2.24017	0.565889	0.437973	-0.127915	12	132663428	F	I		IGR	island	IGR-island	chr12:132663322-132663748				rs7131748
cg03546235	-0.1125	0.30313	-3.54275	0.0028874	0.189239	-2.24337	0.267974	0.380474	0.1125	10	102590290	F	II		IGR	island	IGR-island	chr10:102590122-102590402
cg24756105	0.106208	0.701865	3.54204	0.00289163	0.189308	-2.24482	0.735055	0.628847	-0.106208	18	76271399	F	II		IGR	opensea	IGR-opensea					rs79457300
cg02898500	0.111474	0.79115	3.53995	0.0029042	0.189678	-2.24911	0.825986	0.714512	-0.111474	13	113826554	F	I	PROZ	3'UTR	opensea	3'UTR-opensea			TRUE
cg25924274	0.109244	0.374768	3.53968	0.00290578	0.189678	-2.24965	0.408907	0.299663	-0.109244	2	121071122	F	II		IGR	opensea	IGR-opensea			TRUE
cg13131015	0.112963	0.616248	3.53925	0.0029084	0.189686	-2.25054	0.651549	0.538586	-0.112963	12	14849542	F	II	GUCY2C	TSS200	opensea	TSS200-opensea				low-CpG:14740761-14740810	rs3811173
cg00646731	0.100584	0.764745	3.53909	0.00290935	0.189686	-2.25087	0.796178	0.695594	-0.100584	17	46668733	R	I	LOC404266	TSS1500	shore	TSS1500-shore	chr17:46669434-46669811
cg17584530	-0.108772	0.804932	-3.53808	0.00291543	0.189881	-2.25293	0.77094	0.879713	0.108772	6	45587862	R	II		IGR	opensea	IGR-opensea			TRUE
cg00496961	-0.139556	0.439686	-3.53659	0.00292445	0.189943	-2.25598	0.396075	0.535631	0.139556	11	102638706	F	I		IGR	opensea	IGR-opensea
cg06859135	0.104749	0.85775	3.53646	0.0029252	0.189943	-2.25624	0.890484	0.785736	-0.104749	14	75834284	F	II		IGR	opensea	IGR-opensea			TRUE
cg19375587	0.108541	0.794791	3.53554	0.00293079	0.190123	-2.25813	0.828711	0.72017	-0.108541	11	2871478	F	I		IGR	island	IGR-island	chr11:2871364-2871940
cg23656161	0.115294	0.748417	3.53539	0.00293171	0.190123	-2.25843	0.784446	0.669153	-0.115294	22	17847424	F	II		IGR	shelf	IGR-shelf	chr22:17849474-17850733
cg19084893	0.100995	0.292598	3.53403	0.00293992	0.19013	-2.2612	0.324159	0.223164	-0.100995	1	31688959	R	II		IGR	opensea	IGR-opensea			TRUE
cg27333099	0.110367	0.726367	3.53289	0.00294688	0.190358	-2.26354	0.760857	0.650489	-0.110367	5	180325579	F	II	BTNL8	TSS1500	opensea	TSS1500-opensea
cg23318893	0.136032	0.494133	3.53283	0.00294723	0.190358	-2.26366	0.536643	0.400611	-0.136032	6	29974083	R	II	HLA-J	Body	shore	Body-shore	chr6:29974220-29975369	TRUE
cg21887097	0.104993	0.325775	3.5322	0.00295107	0.190385	-2.26494	0.358585	0.253593	-0.104993	7	107623479	F	II	LAMB1	Body	opensea	Body-opensea			TRUE		rs6952333
cg09457255	0.102356	0.868148	3.53193	0.00295271	0.190385	-2.26549	0.900134	0.797778	-0.102356	3	148933841	F	II	CP	Body	opensea	Body-opensea			TRUE
cg01110765	-0.107323	0.618961	-3.5318	0.0029535	0.190385	-2.26576	0.585423	0.692746	0.107323	X	40016611	R	II	BCOR	5'UTR	shore	5'UTR-shore	chrX:40017372-40017884	TRUE
cg26864691	0.106954	0.818126	3.53159	0.0029548	0.190385	-2.26619	0.851549	0.744595	-0.106954	1	2947791	F	II		IGR	opensea	IGR-opensea
cg27153327	0.122419	0.62956	3.52912	0.00296993	0.190516	-2.27124	0.667816	0.545397	-0.122419	16	1920815	R	II	C16orf73	5'UTR	shore	5'UTR-shore	chr16:1921897-1922426	TRUE
cg05924537	0.133756	0.825052	3.529	0.0029707	0.190516	-2.2715	0.866851	0.733094	-0.133756	3	169588423	F	II	LRRC31	TSS1500	opensea	TSS1500-opensea			TRUE
cg07918509	0.113461	0.633283	3.52887	0.00297144	0.190516	-2.27174	0.668739	0.555278	-0.113461	17	62083407	R	II	ICAM2	Body	opensea	Body-opensea		TRUE
cg09864227	0.105247	0.436866	3.52867	0.00297269	0.190516	-2.27216	0.469756	0.364509	-0.105247	1	1008207	F	I		IGR	shelf	IGR-shelf	chr1:1011509-1013402
cg22417566	0.148082	0.685416	3.52737	0.00298071	0.19054	-2.27482	0.731692	0.583609	-0.148082	18	76323014	R	I		IGR	island	IGR-island	chr18:76322675-76323015
cg05875421	-0.113058	0.713488	-3.52581	0.00299035	0.190717	-2.27802	0.678158	0.791215	0.113058	14	91709951	F	II	GPR68	5'UTR	opensea	5'UTR-opensea		TRUE	TRUE
cg00057667	-0.11632	0.694449	-3.52571	0.00299091	0.190717	-2.2782	0.658099	0.774419	0.11632	6	140069730	R	II		IGR	opensea	IGR-opensea			TRUE
cg03804255	0.101418	0.625786	3.52521	0.00299402	0.190731	-2.27923	0.657479	0.556061	-0.101418	12	90278335	R	II		IGR	opensea	IGR-opensea			TRUE
cg09340513	0.118251	0.820981	3.52471	0.00299714	0.190901	-2.28026	0.857934	0.739684	-0.118251	16	2145668	F	II	PKD1	Body	shelf	Body-shelf	chr16:2139803-2142170	TRUE
cg18764814	0.105364	0.56667	3.52264	0.00301	0.190903	-2.28449	0.599596	0.494232	-0.105364	5	1974131	F	II		IGR	opensea	IGR-opensea
cg11298246	0.114768	0.840791	3.52225	0.00301241	0.190903	-2.28528	0.876656	0.761888	-0.114768	13	22784439	F	II		IGR	opensea	IGR-opensea			TRUE
cg10264012	-0.128142	0.23095	-3.52117	0.00301914	0.190903	-2.28749	0.190906	0.319048	0.128142	6	78359965	F	II		IGR	island	IGR-island	chr6:78359857-78360344
cg21816393	0.117064	0.746145	3.52107	0.00301979	0.190903	-2.2877	0.782727	0.665663	-0.117064	2	173115688	F	II		IGR	opensea	IGR-opensea			TRUE		rs75564070
cg13392861	0.10752	0.789389	3.52033	0.00302438	0.190931	-2.2892	0.822989	0.715469	-0.10752	9	37914861	F	II		IGR	opensea	IGR-opensea			TRUE
cg01426475	0.10759	0.785402	3.51931	0.00303075	0.19102	-2.29128	0.819024	0.711434	-0.10759	7	22397832	F	II	RAPGEF5	TSS1500	shore	TSS1500-shore	chr7:22396039-22396852
cg23586659	0.102696	0.771234	3.5193	0.00303082	0.19102	-2.2913	0.803326	0.70063	-0.102696	1	225671990	R	II		IGR	opensea	IGR-opensea
cg11469051	0.12934	0.569065	3.51901	0.00303268	0.19102	-2.29191	0.609483	0.480144	-0.12934	4	24804131	F	II		IGR	shelf	IGR-shelf	chr4:24801109-24801902				rs77213297
cg20932397	0.10479	0.680349	3.51835	0.00303682	0.19102	-2.29326	0.713096	0.608306	-0.10479	19	1313146	R	II		IGR	island	IGR-island	chr19:1312787-1313528		TRUE
cg21534931	0.117454	0.680877	3.51828	0.00303725	0.19102	-2.2934	0.717581	0.600127	-0.117454	1	17381980	R	II	SDHB	TSS1500	shore	TSS1500-shore	chr1:17380456-17380722
cg08422172	0.125268	0.755612	3.51795	0.00303933	0.19102	-2.29407	0.794758	0.66949	-0.125268	16	11886668	R	II		IGR	shelf	IGR-shelf	chr16:11890324-11891521
cg20723436	0.103887	0.462595	3.51754	0.00304189	0.19102	-2.29491	0.49506	0.391173	-0.103887	2	139428554	F	II	NXPH2	Body	opensea	Body-opensea			TRUE
cg14216252	0.142993	0.765276	3.51731	0.00304334	0.19102	-2.29538	0.809961	0.666968	-0.142993	1	64349562	F	II	ROR1	Body	opensea	Body-opensea			TRUE
cg06438559	0.102829	0.412103	3.51599	0.00305164	0.19115	-2.29807	0.444237	0.341408	-0.102829	5	136478693	F	II	SPOCK1	Body	opensea	Body-opensea		TRUE	TRUE
cg24174020	0.104179	0.68631	3.5147	0.00305979	0.19127	-2.3007	0.718866	0.614687	-0.104179	11	1224985	F	I		IGR	shelf	IGR-shelf	chr11:1228751-1229024
cg17738861	0.126638	0.609056	3.51451	0.00306101	0.19127	-2.3011	0.64863	0.521992	-0.126638	5	32233621	F	II	MTMR12	Body	opensea	Body-opensea			TRUE
cg20566475	0.104581	0.697277	3.51436	0.00306195	0.19127	-2.3014	0.729958	0.625377	-0.104581	10	126278272	R	II	LHPP	Body	shore	Body-shore	chr10:126278298-126278503	TRUE	TRUE
cg12368105	0.100593	0.755436	3.51419	0.00306304	0.19127	-2.30175	0.786871	0.686278	-0.100593	11	34881685	F	II		IGR	opensea	IGR-opensea			TRUE		rs78931021
cg17104959	0.127957	0.637587	3.51416	0.00306321	0.19127	-2.30181	0.677574	0.549617	-0.127957	1	95696376	F	II		IGR	shelf	IGR-shelf	chr1:95699725-95700142
cg08328750	0.101987	0.609979	3.51315	0.00306961	0.19127	-2.30387	0.64185	0.539863	-0.101987	17	39675355	F	II	KRT15	TSS200	opensea	TSS200-opensea
cg27120543	0.111672	0.568619	3.51278	0.00307194	0.19127	-2.30462	0.603516	0.491844	-0.111672	7	15555129	R	II	TMEM195	Body	opensea	Body-opensea			TRUE			rs79581560
cg10429361	0.108474	0.607175	3.51256	0.00307336	0.19127	-2.30508	0.641073	0.532599	-0.108474	5	10202157	R	II		IGR	opensea	IGR-opensea			TRUE			rs71599520
cg10260486	0.100769	0.84288	3.51242	0.00307425	0.19127	-2.30536	0.87437	0.773601	-0.100769	11	11836137	R	II		IGR	opensea	IGR-opensea			TRUE
cg27300829	0.108897	0.271668	3.51183	0.00307803	0.19127	-2.30658	0.305698	0.196801	-0.108897	13	48811111	F	II	ITM2B	Body	shelf	Body-shelf	chr13:48806982-48807948		TRUE		rs9332251
cg01268571	-0.149024	0.448164	-3.51104	0.00308306	0.19127	-2.30819	0.401594	0.550617	0.149024	2	170624998	F	I		IGR	island	IGR-island	chr2:170624684-170625480		TRUE
cg08828193	0.107799	0.496606	3.51073	0.00308504	0.19127	-2.30883	0.530293	0.422494	-0.107799	10	179725	R	II	ZMYND11	TSS1500	shore	TSS1500-shore	chr10:180582-182452
cg26089165	0.147544	0.529474	3.51068	0.00308534	0.19127	-2.30892	0.575582	0.428038	-0.147544	2	237702420	F	II		IGR	opensea	IGR-opensea
cg13074203	-0.124856	0.355647	-3.51001	0.0030896	0.191345	-2.31029	0.31663	0.441486	0.124856	8	121798364	F	II	SNTB1	Body	opensea	Body-opensea			TRUE		rs7010904
cg22203219	-0.142383	0.292113	-3.50934	0.00309393	0.191472	-2.31167	0.247618	0.390001	0.142383	12	6665335	F	II	IFFO1	TSS200	island	TSS200-island	chr12:6664425-6665336
cg05451730	0.10611	0.869803	3.50902	0.00309594	0.191507	-2.31231	0.902962	0.796852	-0.10611	16	80358022	F	II		IGR	opensea	IGR-opensea			TRUE		rs77088404
cg10969241	-0.113625	0.740284	-3.50826	0.00310083	0.191538	-2.31387	0.704777	0.818402	0.113625	10	131989534	F	II		IGR	shore	IGR-shore	chr10:131988211-131989332				rs10764938	rs71007602
cg15579696	0.12014	0.644963	3.50798	0.00310257	0.191556	-2.31443	0.682507	0.562367	-0.12014	1	2822706	R	II		IGR	opensea	IGR-opensea
cg14898892	0.135607	0.687652	3.50739	0.00310641	0.191642	-2.31564	0.730029	0.594422	-0.135607	4	77356180	R	II	SHROOM3	TSS200	opensea	TSS200-opensea						rs79948330
cg02799090	0.103213	0.772094	3.50708	0.00310838	0.191662	-2.31627	0.804348	0.701135	-0.103213	10	130508166	F	II		IGR	shore	IGR-shore	chr10:130508443-130508658
cg15469709	0.118825	0.619828	3.50697	0.0031091	0.191678	-2.3165	0.65696	0.538136	-0.118825	1	116653300	R	II	C1orf161	TSS1500	opensea	TSS1500-opensea			TRUE
cg11815811	0.11406	0.875404	3.50626	0.00311363	0.191704	-2.31794	0.911047	0.796987	-0.11406	3	151952874	R	II		IGR	opensea	IGR-opensea			TRUE
cg15884713	0.122595	0.616308	3.50568	0.00311741	0.191846	-2.31914	0.654619	0.532024	-0.122595	12	772966	R	II	NINJ2	TSS1500	opensea	TSS1500-opensea			TRUE
cg22462010	-0.124926	0.129199	-3.50541	0.00311916	0.191846	-2.31969	0.0901596	0.215086	0.124926	8	124173385	R	I		IGR	island	IGR-island	chr8:124172800-124173541
cg05632420	-0.113294	0.568288	-3.50496	0.00312206	0.191846	-2.32061	0.532883	0.646178	0.113294	7	130793732	R	II	MKLN1	TSS1500	shore	TSS1500-shore	chr7:130794689-130795032
cg18680587	0.103982	0.660221	3.50411	0.00312754	0.191846	-2.32234	0.692715	0.588733	-0.103982	19	15725874	R	II	CYP4F8	TSS200	opensea	TSS200-opensea
cg13588354	0.100141	0.223253	3.50369	0.00313024	0.191846	-2.3232	0.254547	0.154406	-0.100141	20	54823303	F	II	MC3R	TSS1500	shore	TSS1500-shore	chr20:54824312-54824584	TRUE
cg20666585	0.116006	0.768608	3.50337	0.00313229	0.191846	-2.32384	0.80486	0.688854	-0.116006	15	31523186	F	II		IGR	opensea	IGR-opensea
cg25463742	0.117556	0.641504	3.50331	0.00313273	0.191846	-2.32398	0.67824	0.560685	-0.117556	1	10839574	F	I	CASZ1	5'UTR	opensea	5'UTR-opensea		TRUE	TRUE
cg03393769	0.129072	0.788594	3.50299	0.0031348	0.191846	-2.32463	0.828929	0.699857	-0.129072	2	54611906	F	I		IGR	opensea	IGR-opensea			TRUE
cg25792999	0.121985	0.690636	3.50266	0.00313691	0.191846	-2.3253	0.728756	0.606771	-0.121985	15	98065822	R	II		IGR	opensea	IGR-opensea						rs75247696
cg24735210	-0.131651	0.38961	-3.49977	0.00315569	0.192013	-2.33119	0.348469	0.48012	0.131651	7	38351468	F	II		IGR	shore	IGR-shore	chr7:38350920-38351331	TRUE
cg18782774	0.114901	0.549575	3.49976	0.00315577	0.192013	-2.33122	0.585482	0.470581	-0.114901	5	34483876	R	II		IGR	opensea	IGR-opensea			TRUE
cg24239961	0.123088	0.539248	3.49907	0.0031603	0.192026	-2.33264	0.577713	0.454625	-0.123088	6	31794472	R	II	HSPA1B	TSS1500	shore	TSS1500-shore	chr6:31795467-31797384
cg05666036	-0.13697	0.530152	-3.49888	0.00316155	0.192069	-2.33303	0.487349	0.624319	0.13697	6	101848236	F	II	GRIK2	Body	shore	Body-shore	chr6:101849806-101850974		TRUE
cg20595198	-0.162202	0.472513	-3.49878	0.00316216	0.192078	-2.33322	0.421825	0.584027	0.162202	11	122679695	F	II	UBASH3B	Body	opensea	Body-opensea			TRUE		rs35889758	rs66734411
cg02939659	0.133323	0.839232	3.49815	0.00316629	0.192218	-2.33451	0.880896	0.747573	-0.133323	14	102054070	R	I		IGR	island	IGR-island	chr14:102053868-102054163
cg13239848	-0.162986	0.202589	-3.49713	0.00317296	0.192301	-2.33659	0.151655	0.314642	0.162986	1	12213514	R	II		IGR	opensea	IGR-opensea		TRUE
cg19339146	0.136789	0.633655	3.49639	0.00317785	0.192301	-2.33811	0.676402	0.539613	-0.136789	4	62397911	F	II	LPHN3	Body	opensea	Body-opensea			TRUE
cg09978996	-0.105308	0.280221	-3.49565	0.00318271	0.192376	-2.33962	0.247312	0.35262	0.105308	10	70321668	R	II	TET1	5'UTR	shore	5'UTR-shore	chr10:70320130-70320822	TRUE
cg23737737	-0.141459	0.168259	-3.49506	0.00318661	0.192376	-2.34083	0.124053	0.265513	0.141459	12	6665370	R	I	IFFO1	TSS200	shore	TSS200-shore	chr12:6664425-6665336
cg15597855	0.107835	0.741209	3.49447	0.00319045	0.192376	-2.34202	0.774907	0.667072	-0.107835	1	117753602	F	II	VTCN1	TSS200	opensea	TSS200-opensea					rs79537894
cg15831228	0.107546	0.822886	3.49361	0.00319618	0.192376	-2.34379	0.856494	0.748948	-0.107546	2	80060018	R	II	CTNNA2	Body	opensea	Body-opensea			TRUE
cg25499543	0.218412	0.524761	3.49326	0.00319845	0.192376	-2.34449	0.593015	0.374603	-0.218412	15	39871876	F	II	THBS1	TSS1500	shore	TSS1500-shore	chr15:39872527-39873567
cg10011495	0.110031	0.577252	3.49296	0.00320046	0.192376	-2.34511	0.611637	0.501606	-0.110031	22	46516475	F	II		IGR	shore	IGR-shore	chr22:46518454-46518729	TRUE			rs5768751
cg07071764	0.115111	0.419001	3.49241	0.00320411	0.192376	-2.34624	0.454973	0.339862	-0.115111	11	92441315	F	II	FAT3	Body	opensea	Body-opensea			TRUE		rs75451703
cg11490944	0.124235	0.641786	3.49053	0.00321658	0.192478	-2.35007	0.680609	0.556374	-0.124235	10	103334150	F	I		IGR	shelf	IGR-shelf	chr10:103329852-103330311
cg22653140	0.109133	0.500937	3.49045	0.00321714	0.192478	-2.35024	0.535041	0.425908	-0.109133	10	81214225	R	I		IGR	opensea	IGR-opensea		TRUE	TRUE
cg25303761	0.238091	0.406272	3.49043	0.00321724	0.192478	-2.35028	0.480676	0.242584	-0.238091	1	31256028	R	II		IGR	opensea	IGR-opensea			TRUE
cg10210594	-0.150738	0.472796	-3.49019	0.00321886	0.192478	-2.35077	0.42569	0.576428	0.150738	1	208132787	F	I		IGR	island	IGR-island	chr1:208132327-208133117	TRUE
cg20777398	-0.128301	0.260921	-3.48976	0.0032217	0.192478	-2.35164	0.220827	0.349128	0.128301	6	28956244	R	II		IGR	island	IGR-island	chr6:28956106-28956578
cg08433504	0.145343	0.384049	3.48935	0.00322444	0.192478	-2.35248	0.429468	0.284125	-0.145343	15	39872071	F	I	THBS1	TSS1500	shore	TSS1500-shore	chr15:39872527-39873567
cg15227994	-0.121939	0.521514	-3.48923	0.00322522	0.192478	-2.35272	0.483408	0.605347	0.121939	10	85951128	R	II		IGR	shelf	IGR-shelf	chr10:85954199-85955303
cg05160751	-0.124234	0.613204	-3.48889	0.00322747	0.19252	-2.35341	0.574381	0.698614	0.124234	1	24192033	F	II	FUCA1	Body	shelf	Body-shelf	chr1:24194254-24194990	TRUE			rs2228424
cg07570687	-0.131513	0.552338	-3.48797	0.00323368	0.192558	-2.35531	0.511241	0.642753	0.131513	10	102243282	R	II	WNT8B	3'UTR	shore	3'UTR-shore	chr10:102241980-102242559		TRUE
cg09147119	0.127085	0.622944	3.48788	0.00323423	0.192564	-2.35547	0.662658	0.535573	-0.127085	11	61425222	F	II		IGR	opensea	IGR-opensea			TRUE
cg02227026	0.100802	0.864243	3.48654	0.00324319	0.192725	-2.35821	0.895744	0.794942	-0.100802	8	8173791	F	II		IGR	shore	IGR-shore	chr8:8175699-8176775
cg06408185	-0.112323	0.248221	-3.48652	0.00324335	0.192725	-2.35826	0.21312	0.325443	0.112323	X	18443714	R	I	CDKL5	TSS200	island	TSS200-island	chrX:18443120-18444426			high-CpG:18353623-18353678
cg21293216	0.11987	0.494727	3.48421	0.00325888	0.192898	-2.36297	0.532186	0.412316	-0.11987	1	24469768	R	II	IL22RA1	TSS200	opensea	TSS200-opensea		TRUE	TRUE
cg14868128	0.123471	0.611985	3.48352	0.00326354	0.192898	-2.36438	0.65057	0.527099	-0.123471	6	22367352	F	II		IGR	opensea	IGR-opensea			TRUE
cg11730559	0.111811	0.898267	3.47901	0.00329408	0.193338	-2.37358	0.933208	0.821398	-0.111811	8	116506662	F	II	TRPS1	Body	opensea	Body-opensea			TRUE
cg09529783	0.109825	0.76661	3.47888	0.00329497	0.193338	-2.37384	0.80093	0.691105	-0.109825	8	1958930	R	II		IGR	shore	IGR-shore	chr8:1956926-1957177
cg22115168	0.105299	0.876466	3.47696	0.00330807	0.193428	-2.37776	0.909372	0.804073	-0.105299	6	114567943	R	II		IGR	opensea	IGR-opensea			TRUE
cg10588023	0.10196	0.803298	3.47689	0.00330859	0.193428	-2.37792	0.835161	0.733201	-0.10196	22	50141731	R	II		IGR	shelf	IGR-shelf	chr22:50144430-50144635
cg18760534	0.117279	0.625575	3.47661	0.00331049	0.193428	-2.37848	0.662224	0.544946	-0.117279	2	2964910	R	I		IGR	opensea	IGR-opensea
cg07370221	0.117551	0.343053	3.47656	0.00331085	0.193428	-2.37859	0.379788	0.262237	-0.117551	12	132904796	R	II	GALNT9	Body	shore	Body-shore	chr12:132905449-132906206		TRUE
cg24620709	0.10809	0.828848	3.47612	0.00331384	0.193428	-2.37948	0.862626	0.754536	-0.10809	5	87543646	R	II	TMEM161B	Body	opensea	Body-opensea			TRUE
cg14874742	0.105763	0.626547	3.47609	0.00331403	0.193428	-2.37954	0.659598	0.553835	-0.105763	5	146602815	R	II		IGR	opensea	IGR-opensea			TRUE
cg13699355	-0.18431	0.284532	-3.47497	0.0033217	0.193428	-2.38182	0.226935	0.411245	0.18431	2	468179	R	I		IGR	island	IGR-island	chr2:467849-468659		TRUE
cg16577356	-0.107168	0.479702	-3.47478	0.00332306	0.193428	-2.38222	0.446212	0.55338	0.107168	6	53600006	R	II		IGR	opensea	IGR-opensea			TRUE
cg26337559	0.10061	0.795982	3.47438	0.00332577	0.193428	-2.38303	0.827422	0.726812	-0.10061	8	143535735	F	I		IGR	island	IGR-island	chr8:143535484-143535892		TRUE		rs75115813
cg05724257	0.105693	0.728211	3.47436	0.0033259	0.193428	-2.38307	0.76124	0.655547	-0.105693	6	34524290	F	II	SPDEF	TSS200	opensea	TSS200-opensea
cg06759629	-0.126066	0.234291	-3.47419	0.00332711	0.193428	-2.38343	0.194895	0.320961	0.126066	4	25090198	R	II		IGR	island	IGR-island	chr4:25090106-25090510		TRUE
cg27103585	0.122763	0.786948	3.47375	0.00333011	0.193445	-2.38432	0.825312	0.702549	-0.122763	22	17955274	F	II	CECR2	TSS1500	opensea	TSS1500-opensea			TRUE		rs5992724
cg10977352	0.116303	0.493187	3.4717	0.00334429	0.193457	-2.38851	0.529532	0.413229	-0.116303	2	220862582	F	II		IGR	opensea	IGR-opensea			TRUE		rs6436181
cg02799466	-0.100594	0.65278	-3.47141	0.00334626	0.193457	-2.38909	0.621345	0.721939	0.100594	2	230136411	R	II	PID1	TSS1500	shore	TSS1500-shore	chr2:230135708-230136004
cg07013955	-0.125042	0.38425	-3.47087	0.00335003	0.193457	-2.3902	0.345174	0.470216	0.125042	16	1595532	R	II	IFT140	Body	shelf	Body-shelf	chr16:1598952-1599157		TRUE			rs59045034
cg27338353	0.11225	0.383031	3.47059	0.00335194	0.193457	-2.39077	0.418109	0.305859	-0.11225	22	46471129	R	II		IGR	shelf	IGR-shelf	chr22:46465976-46468528
cg11726701	0.113977	0.531306	3.47043	0.00335308	0.193457	-2.3911	0.566924	0.452947	-0.113977	2	85998588	R	II	ATOH8	Body	opensea	Body-opensea			TRUE
cg12688240	0.109064	0.496631	3.47018	0.00335481	0.193457	-2.39161	0.530714	0.42165	-0.109064	12	7940852	F	II	NANOG	TSS1500	opensea	TSS1500-opensea
cg10060562	0.10678	0.604174	3.46991	0.00335664	0.193457	-2.39215	0.637542	0.530762	-0.10678	4	82127274	F	II	PRKG2	TSS1500	opensea	TSS1500-opensea			TRUE
cg05561696	0.12629	0.845762	3.46915	0.00336198	0.193457	-2.39372	0.885228	0.758937	-0.12629	10	3149796	F	II	PFKP	Body	shore	Body-shore	chr10:3148406-3148625	TRUE			rs79639736
cg10273615	0.114582	0.73	3.46857	0.00336598	0.193457	-2.39489	0.765807	0.651225	-0.114582	7	137489165	R	II	DGKI	Body	opensea	Body-opensea			TRUE
cg08576208	0.106536	0.150073	3.46849	0.00336652	0.193457	-2.39505	0.183366	0.0768299	-0.106536	4	4858059	R	II		IGR	shore	IGR-shore	chr4:4858389-4858893	TRUE
cg06817455	-0.143707	0.419145	-3.46789	0.00337069	0.193461	-2.39627	0.374237	0.517944	0.143707	1	212626474	F	II		IGR	opensea	IGR-opensea			TRUE
cg22210497	-0.116677	0.370862	-3.46754	0.00337316	0.193461	-2.39699	0.334401	0.451078	0.116677	5	175561172	R	II		IGR	opensea	IGR-opensea			TRUE
cg23155785	0.129643	0.678223	3.46661	0.00337962	0.193461	-2.39888	0.718736	0.589094	-0.129643	14	101833415	F	II		IGR	shore	IGR-shore	chr14:101831291-101831695		TRUE
cg02578087	0.162121	0.336708	3.4664	0.0033811	0.193461	-2.39931	0.387371	0.225249	-0.162121	3	8671361	F	I	C3orf32	Body	opensea	Body-opensea		TRUE
cg19601636	-0.107994	0.232468	-3.46636	0.00338138	0.193461	-2.3994	0.19872	0.306714	0.107994	22	20001066	R	II	ARVCF	5'UTR	shelf	5'UTR-shelf	chr22:20003521-20004695	TRUE
cg21181162	0.116717	0.571772	3.46596	0.00338419	0.193461	-2.40022	0.608246	0.491529	-0.116717	8	72650106	R	II		IGR	opensea	IGR-opensea			TRUE
cg24064594	-0.21079	0.236368	-3.46496	0.0033912	0.193519	-2.40226	0.170496	0.381286	0.21079	2	127414827	R	II	GYPC	Body	shore	Body-shore	chr2:127413696-127414171	TRUE	TRUE		rs55663781	rs56238412
cg24879726	0.102883	0.705953	3.46416	0.00339683	0.193519	-2.40389	0.738104	0.635221	-0.102883	1	94032892	F	II	BCAR3	Body	opensea	Body-opensea			TRUE		rs78349214
cg23044391	0.120883	0.879338	3.46258	0.0034079	0.193525	-2.40711	0.917114	0.79623	-0.120883	19	7685239	R	II	XAB2	Body	island	Body-island	chr19:7685152-7686182	TRUE
cg19988482	0.120578	0.614031	3.461	0.00341905	0.193525	-2.41033	0.651711	0.531134	-0.120578	2	394572	R	I		IGR	opensea	IGR-opensea
cg03043127	-0.124092	0.478196	-3.46088	0.00341989	0.193525	-2.41057	0.439417	0.563509	0.124092	5	76010658	R	II	F2R	TSS1500	shore	TSS1500-shore	chr5:76011120-76012292
cg05275595	-0.142841	0.463168	-3.46075	0.00342085	0.193525	-2.41085	0.41853	0.561371	0.142841	19	43857874	F	II	CD177	1stExon	opensea	1stExon-opensea			TRUE
cg02638348	0.104267	0.497969	3.46029	0.0034241	0.193525	-2.41178	0.530552	0.426286	-0.104267	10	134692167	R	I		IGR	shore	IGR-shore	chr10:134692851-134693252		TRUE
cg16983084	0.111423	0.575463	3.45995	0.00342652	0.193525	-2.41248	0.610282	0.49886	-0.111423	7	127117859	R	II		IGR	opensea	IGR-opensea			TRUE
cg14754581	-0.106484	0.0921537	-3.45956	0.00342925	0.193601	-2.41327	0.0588775	0.165361	0.106484	3	46448753	F	II	CCRL2	TSS1500	opensea	TSS1500-opensea			TRUE
cg02006142	0.145009	0.655593	3.45782	0.00344165	0.193911	-2.41683	0.700908	0.555899	-0.145009	8	126302396	R	II	NSMCE2	Body	opensea	Body-opensea			TRUE
cg13679778	0.140174	0.537596	3.45653	0.00345078	0.194075	-2.41944	0.5814	0.441227	-0.140174	6	28493019	F	II	GPX5	TSS1500	opensea	TSS1500-opensea
cg01209984	0.111883	0.51542	3.45628	0.00345257	0.194075	-2.41995	0.550384	0.438501	-0.111883	21	47469679	F	II		IGR	opensea	IGR-opensea		TRUE	TRUE
cg19963839	0.10459	0.575773	3.45555	0.0034578	0.19415	-2.42145	0.608457	0.503867	-0.10459	10	134700254	F	II		IGR	shore	IGR-shore	chr10:134698653-134698968
cg00890916	0.100807	0.799496	3.45343	0.00347303	0.1943	-2.42578	0.830998	0.730191	-0.100807	20	30158833	F	II		IGR	shore	IGR-shore	chr20:30160786-30161107
cg12591791	0.109679	0.338023	3.45312	0.00347519	0.194369	-2.4264	0.372298	0.262619	-0.109679	12	132970228	F	II		IGR	shore	IGR-shore	chr12:132968012-132969204	TRUE			rs78625911
cg02501166	0.126258	0.635332	3.45249	0.00347974	0.194431	-2.42769	0.674788	0.54853	-0.126258	12	128866698	F	II	TMEM132C	Body	opensea	Body-opensea			TRUE
cg02685896	-0.119616	0.11878	-3.45226	0.00348139	0.194431	-2.42816	0.0814001	0.201016	0.119616	17	27038861	F	I	PROCA1	5'UTR	island	5'UTR-island	chr17:27038084-27038919		TRUE
cg03301582	-0.124772	0.186564	-3.45135	0.00348796	0.194431	-2.43002	0.147572	0.272344	0.124772	7	95026095	R	I	PON3	TSS1500	island	TSS1500-island	chr7:95025559-95026122
cg27100916	0.114546	0.636303	3.45121	0.00348896	0.194431	-2.4303	0.672099	0.557553	-0.114546	12	95945277	R	II	USP44	TSS200	shelf	TSS200-shelf	chr12:95941906-95942979
cg04068914	0.133339	0.561865	3.45118	0.0034892	0.194431	-2.43036	0.603533	0.470194	-0.133339	16	86589886	F	II	MTHFSD	TSS1500	shore	TSS1500-shore	chr16:86588435-86589513				rs74663199
cg03116035	0.114631	0.790254	3.45107	0.00348995	0.194431	-2.43058	0.826076	0.711445	-0.114631	4	170897498	R	II		IGR	opensea	IGR-opensea			TRUE
cg13346872	0.101114	0.85289	3.45089	0.0034913	0.194431	-2.43096	0.884488	0.783374	-0.101114	10	29395076	R	II		IGR	opensea	IGR-opensea			TRUE
cg02088292	0.131139	0.161587	3.45023	0.00349602	0.194581	-2.43229	0.202568	0.0714296	-0.131139	1	235099151	F	II		IGR	opensea	IGR-opensea
cg15824056	-0.105807	0.325014	-3.44975	0.00349953	0.194672	-2.43328	0.29195	0.397757	0.105807	6	158402261	R	II	SYNJ2	TSS1500	island	TSS1500-island	chr6:158402072-158403444
cg24741066	0.100186	0.604669	3.44909	0.00350431	0.19469	-2.43463	0.635977	0.535792	-0.100186	2	1656557	R	I	PXDN	Body	shelf	Body-shelf	chr2:1651995-1653401	TRUE	TRUE
cg13814351	0.108553	0.724625	3.44862	0.00350768	0.19469	-2.43558	0.758548	0.649995	-0.108553	9	136446836	R	II	FAM163B	TSS1500	shelf	TSS1500-shelf	chr9:136444127-136444604
cg07389839	0.10654	0.848105	3.44848	0.00350869	0.19469	-2.43586	0.881399	0.774859	-0.10654	17	74846372	F	II		IGR	opensea	IGR-opensea
cg09249152	0.111553	0.729498	3.44811	0.00351139	0.194748	-2.43662	0.764358	0.652805	-0.111553	2	7597256	F	II		IGR	opensea	IGR-opensea
cg04645150	-0.152077	0.26615	-3.44798	0.00351236	0.194748	-2.43689	0.218626	0.370703	0.152077	6	28584172	F	I		IGR	island	IGR-island	chr6:28583934-28584289
cg07664856	0.101653	0.473505	3.44767	0.00351459	0.194748	-2.43752	0.505271	0.403618	-0.101653	3	1134528	F	II	CNTN6	TSS200	opensea	TSS200-opensea			TRUE			rs74460966
cg23304784	0.15093	0.81226	3.44726	0.00351757	0.194749	-2.43835	0.859426	0.708496	-0.15093	8	2179815	R	II		IGR	opensea	IGR-opensea
cg02520399	0.115763	0.806432	3.44692	0.00352004	0.194761	-2.43904	0.842609	0.726845	-0.115763	8	8168661	R	II		IGR	opensea	IGR-opensea		TRUE	TRUE
cg20271865	0.125421	0.534407	3.44527	0.00353206	0.194962	-2.44241	0.573601	0.44818	-0.125421	13	80233183	R	II		IGR	opensea	IGR-opensea			TRUE
cg24995678	0.158212	0.711349	3.44506	0.00353365	0.194962	-2.44285	0.76079	0.602578	-0.158212	2	235936394	R	I	SH3BP4	5'UTR	opensea	5'UTR-opensea		TRUE
cg02324432	0.137656	0.602096	3.44427	0.00353937	0.194978	-2.44444	0.645114	0.507458	-0.137656	4	166130172	F	II	KLHL2	TSS1500	shore	TSS1500-shore	chr4:166128385-166129255
cg22095128	0.133576	0.767791	3.44294	0.00354914	0.19515	-2.44716	0.809533	0.675957	-0.133576	13	33754450	F	II	STARD13	5'UTR	opensea	5'UTR-opensea			TRUE		rs59803625
cg14181425	0.104309	0.668775	3.44274	0.00355058	0.19515	-2.44756	0.701372	0.597063	-0.104309	3	118924865	R	II		IGR	opensea	IGR-opensea			TRUE
cg23036668	0.105434	0.617514	3.44166	0.00355854	0.19515	-2.44977	0.650462	0.545027	-0.105434	1	88421825	F	II		IGR	opensea	IGR-opensea		TRUE	TRUE
cg08426157	0.108782	0.42287	3.4412	0.00356192	0.19515	-2.45071	0.456864	0.348082	-0.108782	7	18794174	F	I	HDAC9	Body	opensea	Body-opensea			TRUE
cg03895593	0.115163	0.502434	3.43816	0.00358436	0.195398	-2.4569	0.538423	0.423259	-0.115163	1	6064094	R	II		IGR	opensea	IGR-opensea
cg07646362	-0.118505	0.568483	-3.43801	0.00358553	0.195398	-2.45722	0.531451	0.649955	0.118505	16	34208469	R	I		IGR	island	IGR-island	chr16:34208200-34209248
cg10230673	-0.131198	0.220655	-3.43699	0.00359308	0.195533	-2.4593	0.179656	0.310854	0.131198	19	30363526	F	II		IGR	island	IGR-island	chr19:30363202-30363527
cg23220533	-0.10958	0.290386	-3.43687	0.00359392	0.195533	-2.45953	0.256142	0.365722	0.10958	11	65553761	R	II	OVOL1	TSS1500	island	TSS1500-island	chr11:65553749-65555573
cg04817300	0.130587	0.747095	3.43634	0.00359791	0.195584	-2.46062	0.787903	0.657316	-0.130587	11	128812875	R	II	TP53AIP1	TSS200	opensea	TSS200-opensea						rs75197758
cg06224587	0.133049	0.457871	3.43523	0.00360616	0.195667	-2.46288	0.499449	0.3664	-0.133049	4	6540449	F	I		IGR	opensea	IGR-opensea
cg18368125	0.119308	0.858178	3.43489	0.0036087	0.195672	-2.46357	0.895462	0.776154	-0.119308	16	69385827	R	II	TMED6	TSS200	opensea	TSS200-opensea
cg07970752	0.11	0.405338	3.4347	0.00361012	0.195672	-2.46396	0.439713	0.329713	-0.11	16	817463	R	I	MSLN	Body	opensea	Body-opensea		TRUE
cg18781835	0.136078	0.421182	3.43415	0.00361424	0.195672	-2.46509	0.463707	0.327629	-0.136078	2	242892815	R	II		IGR	opensea	IGR-opensea			TRUE
cg22514229	0.123084	0.770695	3.43393	0.00361588	0.195672	-2.46553	0.809159	0.686074	-0.123084	1	94118054	R	II	BCAR3	Body	opensea	Body-opensea			TRUE
cg25420952	0.11206	0.778452	3.43327	0.0036208	0.195672	-2.46687	0.813471	0.701411	-0.11206	9	116841084	F	II	AMBP	TSS1500	opensea	TSS1500-opensea
cg16433265	0.111965	0.739003	3.4327	0.00362506	0.195758	-2.46803	0.773992	0.662027	-0.111965	4	186741815	F	II	SORBS2	5'UTR	opensea	5'UTR-opensea			TRUE
cg16799982	0.115693	0.600937	3.43167	0.00363276	0.1959	-2.47012	0.637091	0.521398	-0.115693	X	18907441	R	II	LOC100132163	TSS1500	opensea	TSS1500-opensea
cg19005335	-0.166787	0.281137	-3.43134	0.00363526	0.195974	-2.4708	0.229016	0.395803	0.166787	12	124942016	F	II	NCOR2	Body	shore	Body-shore	chr12:124941314-124941584	TRUE
cg23689428	0.116779	0.442559	3.4291	0.00365212	0.195991	-2.47536	0.479052	0.362273	-0.116779	2	121223964	R	I	LOC84931	TSS200	opensea	TSS200-opensea			TRUE
cg09801065	0.104977	0.76303	3.42895	0.00365325	0.195991	-2.47567	0.795835	0.690858	-0.104977	5	150949152	R	II	FAT2	TSS1500	opensea	TSS1500-opensea
cg25637972	0.124411	0.642118	3.42769	0.00366282	0.196117	-2.47825	0.680997	0.556586	-0.124411	6	17116181	R	II		IGR	opensea	IGR-opensea		TRUE	TRUE
cg11202686	0.10131	0.534613	3.42707	0.00366754	0.196185	-2.47952	0.566272	0.464962	-0.10131	1	37773895	R	II		IGR	opensea	IGR-opensea
cg02903929	0.133799	0.34184	3.42645	0.0036722	0.196185	-2.48077	0.383652	0.249853	-0.133799	2	216602247	F	II		IGR	opensea	IGR-opensea			TRUE
cg11888982	-0.11784	0.677261	-3.42644	0.00367231	0.196185	-2.4808	0.640436	0.758275	0.11784	8	116231420	F	II		IGR	opensea	IGR-opensea			TRUE
cg05333442	-0.11585	0.807613	-3.4264	0.00367259	0.196185	-2.48087	0.77141	0.88726	0.11585	16	58533743	R	II	NDRG4	Body	shore	Body-shore	chr16:58535040-58535596	TRUE
cg22959827	0.12219	0.573794	3.42534	0.00368062	0.196358	-2.48303	0.611978	0.489788	-0.12219	5	124461245	R	II		IGR	opensea	IGR-opensea			TRUE
cg03079497	-0.127269	0.337317	-3.42491	0.00368392	0.196403	-2.48391	0.297546	0.424814	0.127269	17	1390554	R	I	MYO1C	5'UTR	island	5'UTR-island	chr17:1390456-1390786	TRUE
cg10012059	-0.107561	0.143353	-3.4249	0.00368401	0.196403	-2.48393	0.10974	0.217301	0.107561	19	4327106	F	I	STAP2	Body	island	Body-island	chr19:4326878-4327380		TRUE
cg09046370	0.108592	0.50593	3.4247	0.00368554	0.196446	-2.48434	0.539865	0.431273	-0.108592	5	178670670	F	II	ADAMTS2	Body	opensea	Body-opensea		TRUE	TRUE
cg23777302	0.109441	0.609218	3.42425	0.00368895	0.196486	-2.48525	0.643418	0.533977	-0.109441	11	69706954	F	II		IGR	island	IGR-island	chr11:69706778-69707017		TRUE
cg09427718	0.112319	0.615801	3.42416	0.0036896	0.196486	-2.48543	0.650901	0.538581	-0.112319	4	23819929	F	II	PPARGC1A	Body	opensea	Body-opensea			TRUE
cg13800802	0.100104	0.650089	3.42411	0.00369003	0.196486	-2.48554	0.681371	0.581267	-0.100104	9	98619666	R	II	C9orf130	Body	opensea	Body-opensea			TRUE
cg20751398	0.116193	0.592264	3.42371	0.00369304	0.19652	-2.48635	0.628575	0.512381	-0.116193	11	126660703	R	II	KIRREL3	Body	opensea	Body-opensea			TRUE
cg18320356	-0.137748	0.599202	-3.4236	0.00369394	0.19652	-2.48659	0.556156	0.693904	0.137748	12	10103812	R	II		IGR	opensea	IGR-opensea
cg09499849	0.103993	0.229653	3.42304	0.00369818	0.196522	-2.48772	0.262151	0.158158	-0.103993	2	158695158	R	II	ACVR1	5'UTR	opensea	5'UTR-opensea			TRUE
cg02858960	0.104662	0.620992	3.42286	0.00369953	0.196522	-2.48808	0.653699	0.549037	-0.104662	13	23898364	F	II	SGCG	Body	opensea	Body-opensea			TRUE
cg03581311	0.128503	0.604966	3.42274	0.00370051	0.196522	-2.48834	0.645124	0.516621	-0.128503	4	19457163	R	II		IGR	opensea	IGR-opensea
cg00600617	0.108119	0.506891	3.42263	0.00370131	0.196522	-2.48855	0.540678	0.432559	-0.108119	6	107221887	F	II	LOC553137	Body	opensea	Body-opensea			TRUE
cg10123952	0.157461	0.321825	3.42217	0.00370481	0.196576	-2.48948	0.371032	0.213571	-0.157461	3	100791384	R	II		IGR	opensea	IGR-opensea			TRUE
cg10506742	0.11292	0.721629	3.42145	0.00371038	0.196723	-2.49096	0.756916	0.643996	-0.11292	16	4605312	F	II	LOC342346	TSS1500	opensea	TSS1500-opensea					rs79204881
cg16284279	0.115274	0.504617	3.42065	0.00371654	0.196781	-2.4926	0.54064	0.425366	-0.115274	6	77743952	F	II		IGR	opensea	IGR-opensea			TRUE		rs13216145
cg20726601	0.119642	0.719165	3.41958	0.0037247	0.196907	-2.49476	0.756553	0.636911	-0.119642	5	90635839	R	II		IGR	opensea	IGR-opensea			TRUE
cg06623197	0.101695	0.639585	3.41941	0.00372607	0.196907	-2.49512	0.671364	0.56967	-0.101695	22	30400763	F	II	MTMR3	Body	opensea	Body-opensea			TRUE
cg27491887	-0.10835	0.311071	-3.41835	0.00373424	0.197082	-2.49728	0.277211	0.385561	0.10835	11	2554583	F	II	KCNQ1	Body	shore	Body-shore	chr11:2555405-2555618		TRUE
cg22670819	0.106556	0.462123	3.41755	0.00374037	0.19709	-2.4989	0.495422	0.388866	-0.106556	6	31913759	R	II	CFB	1stExon	opensea	1stExon-opensea		TRUE	TRUE	low-CpG:32021681-32021916
cg05501509	0.102743	0.782339	3.41743	0.00374133	0.197098	-2.49915	0.814446	0.711704	-0.102743	17	75789529	R	I		IGR	island	IGR-island	chr17:75789326-75789553
cg18257996	0.112504	0.682213	3.41519	0.00375871	0.197461	-2.50372	0.71737	0.604866	-0.112504	4	124571385	F	II		IGR	opensea	IGR-opensea			TRUE		rs61098146
cg00235661	0.174636	0.633095	3.41469	0.00376259	0.197504	-2.50473	0.687668	0.513032	-0.174636	3	20228976	F	II	SGOL1	TSS1500	shore	TSS1500-shore	chr3:20227289-20227956
cg22585786	0.100216	0.888087	3.41413	0.00376693	0.197504	-2.50587	0.919405	0.819189	-0.100216	2	169037808	R	II	STK39	Body	opensea	Body-opensea			TRUE
cg00563845	0.113003	0.322414	3.4141	0.00376713	0.197504	-2.50592	0.357727	0.244724	-0.113003	3	58318305	R	II	PXK	TSS1500	shore	TSS1500-shore	chr3:58318398-58319192
cg08466034	-0.128261	0.157551	-3.41327	0.00377366	0.197687	-2.50763	0.117469	0.24573	0.128261	17	16318930	R	II	TRPV2	1stExon	opensea	1stExon-opensea			TRUE	low-CpG:16259573-16259849
cg13933293	-0.131676	0.508849	-3.41283	0.00377704	0.197697	-2.50851	0.467701	0.599377	0.131676	3	184301826	F	II		IGR	island	IGR-island	chr3:184301117-184302134
cg14092045	-0.13627	0.334224	-3.41225	0.00378161	0.197759	-2.5097	0.291639	0.427909	0.13627	9	116450241	F	I		IGR	island	IGR-island	chr9:116450145-116450454
cg26593946	-0.129172	0.245335	-3.41181	0.00378504	0.197822	-2.51059	0.204968	0.33414	0.129172	15	96869043	R	II	NR2F2	TSS200	shelf	TSS200-shelf	chr15:96864881-96866787		TRUE
cg14883605	0.10896	0.577942	3.41162	0.00378651	0.197822	-2.51098	0.611992	0.503032	-0.10896	14	57021828	R	II		IGR	opensea	IGR-opensea			TRUE
cg15171155	0.145438	0.566744	3.41128	0.00378922	0.197862	-2.51168	0.612193	0.466755	-0.145438	3	142844036	R	II		IGR	shelf	IGR-shelf	chr3:142837885-142840838
cg10976311	0.109965	0.518884	3.41035	0.00379647	0.197988	-2.51356	0.553248	0.443283	-0.109965	5	152591026	F	II		IGR	opensea	IGR-opensea			TRUE		rs10043952
cg08642731	0.14546	0.52073	3.4102	0.00379763	0.197988	-2.51386	0.566186	0.420726	-0.14546	10	50507092	R	I	C10orf71	TSS200	opensea	TSS200-opensea
cg02269496	0.167435	0.630435	3.4088	0.00380867	0.198206	-2.51672	0.682758	0.515323	-0.167435	13	113105282	R	II		IGR	shore	IGR-shore	chr13:113106337-113106544
cg07002540	0.102617	0.537912	3.40856	0.00381055	0.198206	-2.51721	0.56998	0.467363	-0.102617	2	85281128	R	II	KCMF1	3'UTR	opensea	3'UTR-opensea			TRUE
cg06093355	0.122676	0.525197	3.40836	0.0038121	0.198206	-2.51761	0.563534	0.440857	-0.122676	2	46547693	F	II	EPAS1	Body	opensea	Body-opensea			TRUE
cg06294470	0.131524	0.614615	3.40746	0.00381918	0.198288	-2.51944	0.655716	0.524192	-0.131524	6	37276086	R	II	TBC1D22B	Body	opensea	Body-opensea			TRUE
cg13446199	-0.101276	0.424003	-3.40631	0.0038283	0.198288	-2.52179	0.392355	0.493631	0.101276	8	143762866	F	II	PSCA	Body	opensea	Body-opensea		TRUE
cg24035484	-0.11999	0.225277	-3.4061	0.00383	0.198318	-2.52223	0.18778	0.30777	0.11999	12	20000505	F	II		IGR	opensea	IGR-opensea			TRUE		rs3901376
cg12374123	-0.141917	0.17492	-3.406	0.0038308	0.198335	-2.52243	0.130571	0.272488	0.141917	15	45406327	F	I	DUOX2	5'UTR	shore	5'UTR-shore	chr15:45406467-45406882		TRUE
cg07301044	-0.115043	0.429542	-3.40557	0.00383417	0.198422	-2.5233	0.393591	0.508634	0.115043	8	9765583	R	II		IGR	shore	IGR-shore	chr8:9762661-9764748
cg27188056	-0.10638	0.653426	-3.40538	0.00383567	0.198422	-2.52368	0.620182	0.726562	0.10638	19	54327847	R	II	NLRP12	TSS200	opensea	TSS200-opensea
cg00939727	0.101642	0.651319	3.4051	0.00383789	0.198422	-2.52425	0.683082	0.581441	-0.101642	2	134935506	F	II		IGR	opensea	IGR-opensea			TRUE
cg14484274	0.1126	0.753388	3.40477	0.00384054	0.198422	-2.52493	0.788576	0.675976	-0.1126	17	47090616	R	II	IGF2BP1	Body	shore	Body-shore	chr17:47091037-47091567	TRUE	TRUE
cg24476722	0.107724	0.887477	3.40348	0.00385074	0.198445	-2.52755	0.921141	0.813417	-0.107724	2	85111399	R	II		IGR	shelf	IGR-shelf	chr2:85107731-85108430
cg16173109	0.104493	0.746614	3.40282	0.00385599	0.198445	-2.52889	0.779268	0.674775	-0.104493	2	242945447	F	II		IGR	island	IGR-island	chr2:242945406-242946563				rs72487855
cg26431550	0.102545	0.48358	3.40282	0.00385605	0.198445	-2.5289	0.515625	0.41308	-0.102545	1	24691176	F	II	C1orf201	Body	opensea	Body-opensea			TRUE
cg11207307	-0.128338	0.337909	-3.40256	0.00385809	0.198445	-2.52942	0.297803	0.426141	0.128338	12	8025593	R	I	SLC2A14	TSS200	island	TSS200-island	chr12:8025364-8025908
cg09099868	-0.103665	0.484686	-3.40214	0.00386147	0.198445	-2.53029	0.452291	0.555956	0.103665	10	22622793	R	II		IGR	shore	IGR-shore	chr10:22623350-22625875
cg11374681	0.130817	0.336833	3.40179	0.00386425	0.198445	-2.53099	0.377713	0.246896	-0.130817	6	133995954	F	II		IGR	opensea	IGR-opensea			TRUE
cg27047044	0.155359	0.676398	3.40151	0.00386652	0.198445	-2.53157	0.724947	0.569588	-0.155359	5	39817018	R	II		IGR	opensea	IGR-opensea			TRUE
cg06642219	0.113987	0.575001	3.40144	0.00386705	0.198445	-2.53171	0.610622	0.496634	-0.113987	1	5586147	F	II		IGR	opensea	IGR-opensea
cg13177458	0.104411	0.498117	3.4014	0.00386737	0.198445	-2.53179	0.530745	0.426334	-0.104411	8	124732088	R	II	ANXA13	Body	opensea	Body-opensea			TRUE
cg16129200	0.121938	0.597211	3.40105	0.00387018	0.198445	-2.53251	0.635317	0.513379	-0.121938	8	98879893	R	II	MATN2	TSS1500	shore	TSS1500-shore	chr8:98881311-98881843
cg25600256	0.128426	0.429236	3.40051	0.00387447	0.198445	-2.5336	0.469369	0.340943	-0.128426	4	127837396	R	II		IGR	opensea	IGR-opensea			TRUE		rs62323520
cg04762312	0.137482	0.570286	3.40051	0.00387449	0.198445	-2.5336	0.613249	0.475767	-0.137482	6	157800071	F	II		IGR	shore	IGR-shore	chr6:157801062-157803377
cg24146331	-0.110204	0.237409	-3.40038	0.00387552	0.198445	-2.53386	0.20297	0.313174	0.110204	10	102590225	F	I		IGR	island	IGR-island	chr10:102590122-102590402
cg09127007	0.115575	0.735093	3.39988	0.00387953	0.198445	-2.53488	0.771211	0.655636	-0.115575	17	35418337	R	II		IGR	opensea	IGR-opensea			TRUE
cg09141635	0.107996	0.57176	3.39927	0.0038844	0.198445	-2.53612	0.605509	0.497513	-0.107996	4	40623291	F	II	RBM47	5'UTR	opensea	5'UTR-opensea			TRUE		rs34610368
cg13411923	0.137913	0.808897	3.39908	0.00388596	0.198445	-2.53651	0.851995	0.714082	-0.137913	12	122396677	F	I	WDR66	Body	opensea	Body-opensea			TRUE
cg16253870	0.114981	0.466633	3.39789	0.00389553	0.198647	-2.53893	0.502565	0.387584	-0.114981	12	68959172	R	II		IGR	opensea	IGR-opensea		TRUE	TRUE
cg24902250	0.106625	0.74771	3.39769	0.00389715	0.198647	-2.53934	0.781031	0.674406	-0.106625	11	112370538	R	I		IGR	opensea	IGR-opensea			TRUE
cg26960719	0.105856	0.807883	3.39706	0.00390224	0.198661	-2.54063	0.840963	0.735108	-0.105856	17	68071302	F	II	KCNJ16	TSS200	opensea	TSS200-opensea					rs78854519
cg03076855	-0.124408	0.158941	-3.39674	0.00390475	0.198661	-2.54126	0.120063	0.244471	0.124408	6	85132322	F	II		IGR	opensea	IGR-opensea
cg23931734	0.104464	0.504075	3.39619	0.00390922	0.198661	-2.54239	0.53672	0.432257	-0.104464	15	63673013	R	II	CA12	Body	shore	Body-shore	chr15:63673888-63674160		TRUE
cg14068057	0.10404	0.570801	3.39599	0.00391086	0.198661	-2.5428	0.603314	0.499273	-0.10404	2	66562437	R	II		IGR	opensea	IGR-opensea			TRUE
cg05526015	0.150976	0.630344	3.39558	0.0039142	0.19869	-2.54364	0.677524	0.526548	-0.150976	6	170553845	F	I		IGR	opensea	IGR-opensea		TRUE	TRUE		rs35783931
cg12073436	-0.130764	0.602074	-3.39552	0.00391463	0.19869	-2.54375	0.56121	0.691975	0.130764	1	206958014	R	I		IGR	opensea	IGR-opensea
cg05754819	0.235254	0.192407	3.39518	0.00391743	0.198704	-2.54446	0.265923	0.0306699	-0.235254	10	79397944	R	II	KCNMA1	TSS1500	island	TSS1500-island	chr10:79396095-79398495
cg12622242	-0.127223	0.727555	-3.39513	0.00391777	0.198704	-2.54454	0.687797	0.815021	0.127223	8	19203257	F	II	SH2D4A	Body	opensea	Body-opensea			TRUE		rs73599077
cg01565584	0.103652	0.868224	3.39484	0.00392017	0.198704	-2.54514	0.900616	0.796963	-0.103652	6	11180077	R	II		IGR	opensea	IGR-opensea			TRUE
cg10975863	-0.106837	0.648405	-3.39292	0.00393576	0.198808	-2.54905	0.615019	0.721856	0.106837	14	68830704	R	II	RAD51L1	Body	opensea	Body-opensea			TRUE
cg21733013	0.103421	0.611133	3.39276	0.00393707	0.198821	-2.54938	0.643452	0.540031	-0.103421	7	22359568	R	II	RAPGEF5	5'UTR	opensea	5'UTR-opensea			TRUE
cg03768175	-0.11268	0.722942	-3.39147	0.00394753	0.199127	-2.55199	0.687729	0.800409	0.11268	18	76615402	F	II		IGR	shore	IGR-shore	chr18:76616616-76617519				rs56328030
cg18448746	-0.166095	0.302117	-3.39083	0.00395278	0.199232	-2.5533	0.250212	0.416307	0.166095	17	27039132	F	I	PROCA1	TSS1500	shore	TSS1500-shore	chr17:27038084-27038919		TRUE
cg21434132	0.12476	0.357768	3.39076	0.00395336	0.199238	-2.55344	0.396756	0.271996	-0.12476	3	196705742	R	II		IGR	opensea	IGR-opensea		TRUE
cg24122364	0.10921	0.629501	3.38976	0.00396151	0.199322	-2.55547	0.663629	0.55442	-0.10921	13	99574736	R	II	DOCK9	Body	opensea	Body-opensea			TRUE
cg15081402	0.165666	0.61963	3.3894	0.00396451	0.199322	-2.55622	0.671401	0.505734	-0.165666	3	64433470	F	II		IGR	shelf	IGR-shelf	chr3:64430585-64431192					rs78027469
cg03274800	0.129571	0.638335	3.38917	0.00396639	0.199322	-2.55669	0.678826	0.549255	-0.129571	8	22852120	F	II	RHOBTB2	Body	opensea	Body-opensea			TRUE
cg08985785	0.125413	0.437119	3.38868	0.00397037	0.199322	-2.55767	0.476311	0.350898	-0.125413	6	39196340	F	I	KCNK5	Body	shore	Body-shore	chr6:39196817-39197517	TRUE
cg15001615	-0.104655	0.556483	-3.38861	0.00397093	0.199322	-2.55781	0.523778	0.628433	0.104655	19	35819775	F	II	CD22	TSS1500	opensea	TSS1500-opensea
cg18422058	0.107295	0.350264	3.38842	0.00397254	0.199322	-2.55821	0.383794	0.276499	-0.107295	14	78951762	R	II	NRXN3	5'UTR	opensea	5'UTR-opensea			TRUE
cg00014998	-0.11319	0.69209	-3.38819	0.00397438	0.199322	-2.55867	0.656719	0.769908	0.11319	2	177014962	R	II	HOXD4	TSS1500	island	TSS1500-island	chr2:177014948-177015214
cg13807254	0.115413	0.694798	3.38798	0.00397609	0.199322	-2.55909	0.730864	0.615451	-0.115413	9	129619813	R	II		IGR	shelf	IGR-shelf	chr9:129622611-129623574
cg18738804	0.122545	0.431203	3.38658	0.00398763	0.199322	-2.56194	0.469498	0.346954	-0.122545	8	86842690	R	II		IGR	shelf	IGR-shelf	chr8:86838850-86840677		TRUE
cg05503433	0.104925	0.80555	3.38652	0.00398818	0.199322	-2.56208	0.838339	0.733414	-0.104925	19	42409117	F	II	ARHGEF1	Body	shore	Body-shore	chr19:42408315-42408535	TRUE
cg14676825	-0.153691	0.153826	-3.38576	0.00399445	0.199322	-2.56362	0.105798	0.259488	0.153691	17	27038886	F	I	PROCA1	TSS200	island	TSS200-island	chr17:27038084-27038919		TRUE
cg21250756	0.10634	0.580552	3.3856	0.00399572	0.199322	-2.56394	0.613784	0.507443	-0.10634	17	36077300	R	II	HNF1B	Body	opensea	Body-opensea			TRUE
cg19507267	0.111709	0.756091	3.38542	0.00399719	0.199322	-2.5643	0.791	0.679291	-0.111709	3	108896930	F	II	C3orf66	TSS200	opensea	TSS200-opensea
cg18801459	0.120197	0.629597	3.38505	0.00400031	0.199383	-2.56507	0.667158	0.546961	-0.120197	3	149751621	R	II		IGR	opensea	IGR-opensea			TRUE
cg26841910	0.102693	0.812814	3.38325	0.0040152	0.199631	-2.56873	0.844906	0.742212	-0.102693	10	29618550	R	II		IGR	opensea	IGR-opensea			TRUE
cg07111719	0.111091	0.811143	3.38231	0.004023	0.199631	-2.57064	0.845859	0.734767	-0.111091	11	2397614	F	II	CD81	TSS1500	shore	TSS1500-shore	chr11:2398223-2399598
cg25546488	-0.175169	0.458718	-3.38169	0.00402817	0.199631	-2.5719	0.403977	0.579146	0.175169	8	90986930	F	II	NBN	Body	opensea	Body-opensea			TRUE
cg12397463	0.114141	0.530074	3.3812	0.00403224	0.199631	-2.57289	0.565743	0.451602	-0.114141	6	33128825	R	II		IGR	shore	IGR-shore	chr6:33129291-33129718
cg26203572	0.118159	0.540538	3.38086	0.0040351	0.199631	-2.57359	0.577462	0.459303	-0.118159	7	47797675	F	I		IGR	opensea	IGR-opensea		TRUE	TRUE
cg13757081	0.123166	0.780935	3.38057	0.0040375	0.199631	-2.57418	0.819424	0.696258	-0.123166	7	26480747	R	II	LOC441204	Body	opensea	Body-opensea			TRUE
cg26010218	0.117044	0.504799	3.38032	0.00403959	0.199631	-2.57469	0.541376	0.424331	-0.117044	4	78977223	R	I	FRAS1	TSS1500	shore	TSS1500-shore	chr4:78978365-78979256
cg11201654	0.216909	0.267443	3.37873	0.00405284	0.199781	-2.57791	0.335227	0.118318	-0.216909	6	29690766	R	II	HLA-F	TSS1500	shore	TSS1500-shore	chr6:29691106-29692093	TRUE
cg21175761	-0.103103	0.677472	-3.37738	0.00406416	0.199915	-2.58065	0.645252	0.748355	0.103103	X	70273254	F	II		IGR	island	IGR-island	chrX:70273009-70273255		TRUE
cg19735421	-0.107151	0.536269	-3.3771	0.00406658	0.199915	-2.58124	0.502784	0.609935	0.107151	5	76010598	F	II	F2R	TSS1500	shore	TSS1500-shore	chr5:76011120-76012292				rs2227817
cg18648037	0.11715	0.466378	3.37665	0.00407036	0.20001	-2.58216	0.502987	0.385837	-0.11715	3	106917496	R	I	LOC100302640	Body	opensea	Body-opensea			TRUE
cg21422605	0.109764	0.786309	3.37637	0.0040727	0.20001	-2.58272	0.82061	0.710846	-0.109764	1	85313514	F	II	LPAR3	Body	opensea	Body-opensea			TRUE
cg18130905	0.124051	0.737569	3.37611	0.00407489	0.20001	-2.58325	0.776335	0.652284	-0.124051	18	30517666	R	I	C18orf34	3'UTR	opensea	3'UTR-opensea			TRUE
cg00852603	0.104879	0.58629	3.37582	0.0040773	0.200018	-2.58383	0.619064	0.514185	-0.104879	18	76725495	F	I		IGR	island	IGR-island	chr18:76724859-76725572
cg08024887	-0.108775	0.469687	-3.37432	0.00408994	0.200185	-2.58688	0.435695	0.54447	0.108775	11	64108241	R	II	CCDC88B	Body	shore	Body-shore	chr11:64109822-64110228	TRUE
cg07745344	0.101084	0.649636	3.37338	0.00409789	0.20024	-2.58879	0.681225	0.58014	-0.101084	8	514802	R	II		IGR	opensea	IGR-opensea
cg06196689	0.110952	0.84528	3.37329	0.00409865	0.20024	-2.58897	0.879953	0.769001	-0.110952	3	124653632	R	II	MUC13	TSS200	opensea	TSS200-opensea
cg17578322	0.112219	0.452402	3.37234	0.00410675	0.20024	-2.59091	0.487471	0.375252	-0.112219	3	55546118	F	II	ERC2	3'UTR	opensea	3'UTR-opensea			TRUE
cg14931884	0.135179	0.316174	3.37228	0.00410729	0.20024	-2.59104	0.358418	0.223239	-0.135179	10	369977	F	I	DIP2C	Body	shore	Body-shore	chr10:367469-369416	TRUE	TRUE		rs7077451
cg27547132	0.106709	0.438982	3.37211	0.00410871	0.20024	-2.59138	0.472329	0.36562	-0.106709	16	5560894	F	II		IGR	opensea	IGR-opensea			TRUE		rs11639680
cg18696027	-0.104399	0.654781	-3.37209	0.00410887	0.20024	-2.59142	0.622157	0.726555	0.104399	15	45002597	F	II	B2M	TSS1500	shore	TSS1500-shore	chr15:45003460-45004345
cg04110902	0.150386	0.59836	3.36958	0.00413026	0.200526	-2.59653	0.645356	0.49497	-0.150386	6	45500999	F	II	RUNX2	Body	opensea	Body-opensea			TRUE		rs76200442
cg20319457	0.114463	0.625464	3.36953	0.00413068	0.200526	-2.59663	0.661234	0.546771	-0.114463	2	20133404	F	II	WDR35	Body	opensea	Body-opensea			TRUE
cg06398242	0.134266	0.528804	3.36911	0.00413422	0.200526	-2.59747	0.570763	0.436496	-0.134266	2	46049176	R	I	PRKCE	Body	opensea	Body-opensea		TRUE	TRUE
cg10713589	-0.145377	0.184556	-3.36911	0.00413426	0.200526	-2.59748	0.139126	0.284503	0.145377	4	119989952	R	II		IGR	opensea	IGR-opensea			TRUE
cg08828819	-0.120375	0.155947	-3.36836	0.00414067	0.200553	-2.59901	0.118329	0.238705	0.120375	7	95025836	F	I	PON3	TSS200	island	TSS200-island	chr7:95025559-95026122
cg06012483	0.109818	0.619102	3.36825	0.00414163	0.200558	-2.59923	0.65342	0.543602	-0.109818	16	86388853	F	II		IGR	opensea	IGR-opensea			TRUE
cg12912809	0.118217	0.600146	3.36723	0.00415031	0.200719	-2.60129	0.637088	0.518872	-0.118217	4	128887467	F	II	MFSD8	TSS1500	shore	TSS1500-shore	chr4:128886004-128886971
cg17102648	0.128222	0.753508	3.3672	0.0041506	0.200719	-2.60136	0.793577	0.665355	-0.128222	1	61401827	F	II		IGR	opensea	IGR-opensea			TRUE
cg26870567	0.11249	0.535073	3.36712	0.00415126	0.200719	-2.60152	0.570226	0.457736	-0.11249	16	24862006	R	II	SLC5A11	5'UTR	opensea	5'UTR-opensea			TRUE
cg14802097	0.121719	0.557307	3.36659	0.00415586	0.200803	-2.60261	0.595345	0.473625	-0.121719	12	42970349	R	II	PRICKLE1	5'UTR	opensea	5'UTR-opensea			TRUE
cg09077443	0.10801	0.76295	3.36485	0.00417077	0.200826	-2.60613	0.796703	0.688694	-0.10801	11	123236871	F	II		IGR	opensea	IGR-opensea			TRUE
cg11855643	0.117221	0.630674	3.36441	0.00417463	0.200826	-2.60704	0.667306	0.550085	-0.117221	1	184473341	R	II	C1orf21	Body	opensea	Body-opensea			TRUE
cg19422019	0.10524	0.553646	3.36342	0.00418311	0.201063	-2.60904	0.586534	0.481293	-0.10524	21	17442803	F	II	C21orf34	TSS200	opensea	TSS200-opensea
cg27027631	-0.126706	0.601535	-3.36317	0.0041853	0.201113	-2.60955	0.561939	0.688645	0.126706	7	115051363	R	II		IGR	opensea	IGR-opensea			TRUE
cg19487738	0.126435	0.722071	3.35933	0.00421867	0.201392	-2.61737	0.761582	0.635146	-0.126435	5	87785433	R	II		IGR	opensea	IGR-opensea			TRUE
cg23004466	0.101794	0.685646	3.35918	0.00421991	0.201402	-2.61765	0.717457	0.615663	-0.101794	7	106815478	F	II	HBP1	5'UTR	opensea	5'UTR-opensea			TRUE
cg16052198	-0.108915	0.527951	-3.35905	0.00422104	0.201402	-2.61792	0.493916	0.60283	0.108915	19	52264411	F	II	FPR2	TSS200	opensea	TSS200-opensea
cg17475304	0.109321	0.755613	3.3582	0.00422848	0.201498	-2.61965	0.789776	0.680455	-0.109321	5	176512896	R	II	FGFR4	TSS1500	shore	TSS1500-shore	chr5:176513886-176514433
cg00348891	0.101695	0.656145	3.35811	0.00422933	0.201512	-2.61985	0.687925	0.58623	-0.101695	13	46251914	R	II		IGR	opensea	IGR-opensea			TRUE
cg05373263	0.111744	0.499071	3.35548	0.00425229	0.20183	-2.62517	0.533991	0.422247	-0.111744	2	3063115	F	I		IGR	shore	IGR-shore	chr2:3063372-3063672				rs13029655
cg16528895	0.130219	0.282354	3.35542	0.00425286	0.201833	-2.6253	0.323048	0.192828	-0.130219	2	108994311	R	II	SULT1C4	TSS200	opensea	TSS200-opensea			TRUE			rs6739225
cg27627493	0.110064	0.774373	3.35528	0.00425409	0.201863	-2.62559	0.808768	0.698704	-0.110064	15	63767360	F	II		IGR	opensea	IGR-opensea			TRUE		rs72748999
cg24996154	0.128762	0.616775	3.3547	0.0042592	0.201863	-2.62677	0.657013	0.528251	-0.128762	15	26360877	R	II		IGR	opensea	IGR-opensea
cg12605747	0.112141	0.551124	3.35422	0.00426339	0.201863	-2.62774	0.586168	0.474027	-0.112141	15	66798443	F	II	RPL4	TSS1500	opensea	TSS1500-opensea
cg26037142	0.11017	0.465509	3.35367	0.00426829	0.201863	-2.62887	0.499937	0.389767	-0.11017	6	32097481	R	II	ATF6B	TSS1500	shore	TSS1500-shore	chr6:32097820-32098086					rs74802272
cg03680517	0.116284	0.417113	3.35327	0.00427183	0.201883	-2.62968	0.453452	0.337167	-0.116284	10	43632967	R	II	CSGALNACT2	TSS1500	island	TSS1500-island	chr10:43632966-43634222
cg03345116	0.10612	0.751212	3.35294	0.00427468	0.201912	-2.63034	0.784374	0.678254	-0.10612	11	114104210	F	I	ZBTB16	Body	opensea	Body-opensea			TRUE
cg13475484	-0.108999	0.18888	-3.35252	0.0042784	0.202008	-2.63119	0.154818	0.263817	0.108999	17	6399562	R	II	PITPNM3	Body	opensea	Body-opensea			TRUE
cg03985360	0.116093	0.622216	3.3525	0.00427863	0.202008	-2.63124	0.658496	0.542402	-0.116093	7	13960140	F	II	ETV1	Body	opensea	Body-opensea		TRUE	TRUE
cg07161061	0.126334	0.536018	3.35233	0.00428009	0.202009	-2.63158	0.575497	0.449163	-0.126334	12	133057193	F	II		IGR	shore	IGR-shore	chr12:133056769-133057105				rs10544565
cg05893029	0.107931	0.213889	3.35189	0.00428401	0.202082	-2.63248	0.247618	0.139686	-0.107931	8	88760082	R	II		IGR	opensea	IGR-opensea			TRUE
cg16449636	0.110857	0.614267	3.35073	0.00429424	0.202171	-2.63483	0.648909	0.538053	-0.110857	5	73234433	R	II		IGR	opensea	IGR-opensea		TRUE	TRUE
cg08812108	0.114679	0.444952	3.35066	0.0042949	0.202171	-2.63498	0.48079	0.366111	-0.114679	6	2515318	R	I		IGR	opensea	IGR-opensea
cg14482811	0.124114	0.595071	3.35044	0.00429682	0.202171	-2.63542	0.633857	0.509743	-0.124114	9	139652837	R	I	LCN8	TSS200	shelf	TSS200-shelf	chr9:139654897-139655154	TRUE
cg10840704	0.108977	0.608273	3.34837	0.00431525	0.202312	-2.63962	0.642328	0.533351	-0.108977	1	59058639	R	II		IGR	opensea	IGR-opensea		TRUE	TRUE
cg21608519	-0.100689	0.714083	-3.34808	0.00431784	0.202312	-2.64021	0.682618	0.783306	0.100689	7	27199752	R	II		IGR	island	IGR-island	chr7:27199661-27200960
cg15881597	-0.109256	0.574605	-3.3478	0.00432032	0.202331	-2.64078	0.540462	0.649718	0.109256	7	73085754	R	II	VPS37D	3'UTR	shelf	3'UTR-shelf	chr7:73081843-73082705		TRUE
cg02440199	0.116835	0.501287	3.34742	0.00432374	0.202331	-2.64156	0.537798	0.420963	-0.116835	7	136691229	F	II	CHRM2	5'UTR	opensea	5'UTR-opensea			TRUE
cg23453435	-0.117724	0.473876	-3.34671	0.00433008	0.202341	-2.643	0.437087	0.554811	0.117724	14	107253290	F	I		IGR	opensea	IGR-opensea						rs73387527
cg07338464	0.109214	0.718335	3.34604	0.00433608	0.202427	-2.64436	0.752464	0.64325	-0.109214	5	148244123	R	II		IGR	opensea	IGR-opensea			TRUE
cg00630761	0.112841	0.55147	3.3459	0.00433731	0.202439	-2.64464	0.586733	0.473892	-0.112841	8	94898169	F	II		IGR	opensea	IGR-opensea			TRUE
cg01635193	-0.128109	0.156869	-3.34579	0.00433831	0.202463	-2.64486	0.116835	0.244944	0.128109	17	42092472	R	II	TMEM101	TSS200	shore	TSS200-shore	chr17:42091712-42091948
cg18632154	0.127971	0.658829	3.34535	0.00434229	0.202514	-2.64577	0.69882	0.570849	-0.127971	3	73105046	F	II	PPP4R2	Body	opensea	Body-opensea			TRUE		rs74747870
cg22169990	-0.132843	0.504209	-3.34507	0.00434483	0.202534	-2.64634	0.462695	0.595538	0.132843	7	150786051	F	I	AGAP3	Body	shore	Body-shore	chr7:150783480-150785040	TRUE	TRUE		rs11769922
cg07734975	-0.138214	0.51828	-3.34478	0.00434741	0.202558	-2.64692	0.475089	0.613303	0.138214	11	9780844	R	I		IGR	shore	IGR-shore	chr11:9779592-9780470	TRUE	TRUE
cg10014470	0.1147	0.728138	3.34454	0.00434957	0.202558	-2.64741	0.763982	0.649282	-0.1147	1	236848700	R	I	ACTN2	TSS1500	shore	TSS1500-shore	chr1:236849472-236850323
cg23322523	0.110947	0.731551	3.34439	0.00435088	0.202558	-2.64771	0.766222	0.655275	-0.110947	8	67039041	R	II	TRIM55	TSS1500	opensea	TSS1500-opensea
cg16485993	0.128714	0.719549	3.34376	0.00435657	0.202597	-2.64899	0.759772	0.631058	-0.128714	13	60205186	R	II		IGR	opensea	IGR-opensea			TRUE
cg16231917	-0.163774	0.431444	-3.34151	0.00437685	0.202845	-2.65356	0.380265	0.544039	0.163774	8	128930166	R	II	PVT1	Body	opensea	Body-opensea			TRUE
cg11815980	0.105074	0.895168	3.34138	0.00437804	0.202868	-2.65383	0.928003	0.822929	-0.105074	3	59787974	R	II	FHIT	Body	opensea	Body-opensea			TRUE
cg19580344	0.131617	0.6195	3.34008	0.00438984	0.203062	-2.65647	0.66063	0.529013	-0.131617	5	16669915	F	II	MYO10	Body	opensea	Body-opensea			TRUE
cg19911430	0.132637	0.549225	3.33938	0.00439618	0.203097	-2.65789	0.590674	0.458037	-0.132637	2	16430654	R	I		IGR	opensea	IGR-opensea			TRUE
cg01823853	0.143443	0.654239	3.33917	0.0043981	0.203097	-2.65832	0.699065	0.555622	-0.143443	7	27646144	R	II	HIBADH	Body	opensea	Body-opensea			TRUE
cg03370261	0.101777	0.748267	3.339	0.00439958	0.203097	-2.65865	0.780072	0.678295	-0.101777	3	14326681	R	II		IGR	opensea	IGR-opensea			TRUE
cg05508296	0.114381	0.762027	3.3384	0.00440504	0.203097	-2.65987	0.797771	0.68339	-0.114381	5	1016460	R	II	NKD2	Body	opensea	Body-opensea		TRUE
cg19463531	0.107248	0.58529	3.3383	0.00440596	0.203097	-2.66007	0.618805	0.511557	-0.107248	4	619272	F	II	PDE6B	TSS200	shore	TSS200-shore	chr4:619513-619912	TRUE
cg25968076	-0.134555	0.137187	-3.33808	0.00440801	0.203097	-2.66053	0.095139	0.229694	0.134555	11	10477399	F	II	AMPD3	TSS200	opensea	TSS200-opensea		TRUE	TRUE
cg19233472	0.138063	0.668083	3.33793	0.00440936	0.203097	-2.66083	0.711228	0.573165	-0.138063	5	169532752	R	II	FOXI1	TSS200	shore	TSS200-shore	chr5:169533080-169533534
cg26170244	-0.102116	0.140837	-3.33782	0.0044103	0.203097	-2.66104	0.108925	0.211041	0.102116	15	65176353	F	II		IGR	opensea	IGR-opensea		TRUE
cg08038178	0.136595	0.612325	3.33737	0.00441446	0.203166	-2.66197	0.655011	0.518416	-0.136595	6	39905662	R	II		IGR	shelf	IGR-shelf	chr6:39901852-39902299
cg06482830	0.13859	0.540247	3.33729	0.00441518	0.203166	-2.66213	0.583557	0.444967	-0.13859	16	1186203	R	II		IGR	opensea	IGR-opensea
cg23401796	0.13736	0.475077	3.33659	0.0044216	0.203371	-2.66356	0.518002	0.380642	-0.13736	8	141248667	R	I	TRAPPC9	Body	opensea	Body-opensea		TRUE	TRUE
cg23871273	0.129322	0.434693	3.33657	0.00442175	0.203371	-2.66359	0.475106	0.345784	-0.129322	14	54038436	F	II		IGR	opensea	IGR-opensea			TRUE
cg01759628	0.102689	0.281788	3.33632	0.00442403	0.203371	-2.6641	0.313878	0.211189	-0.102689	1	235266653	R	II		IGR	shore	IGR-shore	chr1:235267554-235267829
cg23712370	0.147384	0.66076	3.33602	0.00442677	0.203371	-2.66471	0.706817	0.559433	-0.147384	8	128054366	F	II		IGR	opensea	IGR-opensea			TRUE		rs1947521
cg12652953	0.133533	0.787015	3.33563	0.0044303	0.203371	-2.66549	0.828744	0.695211	-0.133533	22	25615525	R	II	CRYBB2	TSS200	opensea	TSS200-opensea
cg17761419	-0.112802	0.770281	-3.33515	0.0044347	0.203384	-2.66646	0.735031	0.847833	0.112802	8	57350749	F	II		IGR	shore	IGR-shore	chr8:57350947-57351285	TRUE
cg25190534	0.12717	0.617748	3.33466	0.00443923	0.203413	-2.66747	0.657489	0.530318	-0.12717	4	40336735	F	II	CHRNA9	TSS1500	opensea	TSS1500-opensea			TRUE		rs74858944	rs77986273
cg00735454	0.10133	0.82797	3.3336	0.00444893	0.203534	-2.66961	0.859636	0.758306	-0.10133	13	44595496	R	II	LOC121838	TSS1500	opensea	TSS1500-opensea
cg09461420	0.169833	0.632497	3.33348	0.00445007	0.203534	-2.66987	0.68557	0.515737	-0.169833	7	155996361	R	I		IGR	opensea	IGR-opensea
cg26897989	0.129363	0.673881	3.33309	0.00445365	0.203534	-2.67066	0.714307	0.584944	-0.129363	16	1907736	R	II	C16orf73	Body	opensea	Body-opensea			TRUE
cg20729460	0.104882	0.737671	3.33259	0.00445821	0.203636	-2.67166	0.770446	0.665564	-0.104882	4	62076499	F	II		IGR	opensea	IGR-opensea			TRUE
cg12550726	0.11147	0.747613	3.33188	0.0044648	0.203674	-2.67311	0.782448	0.670977	-0.11147	4	186425721	F	II	PDLIM3	Body	opensea	Body-opensea		TRUE	TRUE
cg05490366	0.105846	0.867298	3.33128	0.0044703	0.203747	-2.67432	0.900375	0.794528	-0.105846	11	2397831	F	II	CD81	TSS1500	shore	TSS1500-shore	chr11:2398223-2399598
cg05721376	0.11176	0.782856	3.33123	0.00447079	0.203747	-2.67443	0.817781	0.706021	-0.11176	21	40823279	R	II	SH3BGR	5'UTR	opensea	5'UTR-opensea			TRUE
cg22040301	-0.110278	0.601566	-3.33046	0.00447789	0.203775	-2.67599	0.567104	0.677382	0.110278	11	2919798	F	II	SLC22A18AS	Body	shelf	Body-shelf	chr11:2923301-2923817	TRUE	TRUE
cg05455279	0.105406	0.610529	3.33044	0.00447814	0.203775	-2.67604	0.643468	0.538062	-0.105406	3	97109009	R	II	EPHA6	Body	opensea	Body-opensea			TRUE
cg09942166	0.126248	0.861405	3.33043	0.00447818	0.203775	-2.67605	0.900858	0.77461	-0.126248	14	101157915	R	II		IGR	opensea	IGR-opensea
cg04813119	0.10203	0.467947	3.3304	0.00447849	0.203775	-2.67612	0.499831	0.397801	-0.10203	17	75181254	F	II	SEC14L1	Body	opensea	Body-opensea			TRUE
cg19846609	0.192315	0.736038	3.33029	0.00447953	0.203775	-2.67635	0.796137	0.603822	-0.192315	11	124999394	F	I		IGR	opensea	IGR-opensea			TRUE
cg26835302	-0.119146	0.261864	-3.32851	0.00449602	0.203984	-2.67996	0.22463	0.343777	0.119146	12	90343791	R	II		IGR	opensea	IGR-opensea			TRUE
cg17745697	-0.109573	0.691098	-3.32823	0.00449856	0.204022	-2.68052	0.656856	0.76643	0.109573	2	38138126	F	II		IGR	opensea	IGR-opensea			TRUE		rs79682664
cg07051162	-0.105423	0.189232	-3.32747	0.00450566	0.204149	-2.68206	0.156287	0.26171	0.105423	X	30671305	F	I	GK	TSS200	island	TSS200-island	chrX:30670739-30671869
cg23069367	0.10398	0.859133	3.3269	0.004511	0.20416	-2.68323	0.891627	0.787647	-0.10398	13	113358319	F	II	ATP11A	Body	opensea	Body-opensea			TRUE		rs17121518
cg13491563	0.107461	0.597439	3.32589	0.00452034	0.204261	-2.68526	0.631021	0.52356	-0.107461	3	183903302	R	II	ABCF3	TSS1500	shore	TSS1500-shore	chr3:183903386-183904495
cg18621299	-0.142824	0.542772	-3.3257	0.00452218	0.204261	-2.68566	0.49814	0.640964	0.142824	14	100531591	R	II	EVL	TSS200	opensea	TSS200-opensea
cg25188071	0.10725	0.840947	3.32552	0.00452382	0.204261	-2.68602	0.874463	0.767212	-0.10725	20	57393277	F	II	MIR296	TSS1500	opensea	TSS1500-opensea			TRUE
cg22079195	0.115078	0.829235	3.32518	0.00452699	0.204261	-2.68671	0.865197	0.750119	-0.115078	2	100799756	R	II		IGR	opensea	IGR-opensea
cg21383810	-0.133263	0.118055	-3.32503	0.00452839	0.204261	-2.68701	0.0764097	0.209673	0.133263	12	65515470	R	I	WIF1	TSS1500	island	TSS1500-island	chr12:65514878-65515863
cg05869611	0.103429	0.681987	3.32493	0.00452935	0.204261	-2.68722	0.714308	0.61088	-0.103429	7	80096608	F	II	GNAT3	Body	opensea	Body-opensea			TRUE
cg18098839	-0.14107	0.191091	-3.32485	0.00453009	0.204261	-2.68738	0.147006	0.288076	0.14107	3	167742700	R	II	GOLIM4	Body	opensea	Body-opensea		TRUE	TRUE
cg07094693	0.101116	0.84751	3.3243	0.00453521	0.204318	-2.68849	0.879109	0.777993	-0.101116	2	119876466	R	II		IGR	opensea	IGR-opensea			TRUE			rs78384432
cg08000118	-0.188622	0.190314	-3.32382	0.00453978	0.204373	-2.68948	0.13137	0.319992	0.188622	8	144105709	F	II		IGR	island	IGR-island	chr8:144105675-144105879	TRUE
cg23230584	-0.147742	0.174043	-3.32291	0.00454832	0.204476	-2.69132	0.127873	0.275615	0.147742	7	95025740	F	I	PON3	TSS200	island	TSS200-island	chr7:95025559-95026122
cg22942200	-0.114839	0.267671	-3.32261	0.00455108	0.204476	-2.69192	0.231783	0.346623	0.114839	6	151560992	F	I	AKAP12	TSS200	island	TSS200-island	chr6:151560766-151560993	TRUE
cg00735923	-0.141638	0.122847	-3.32213	0.0045556	0.204476	-2.69289	0.078585	0.220223	0.141638	7	117119963	R	II	CFTR	TSS200	opensea	TSS200-opensea				low-CpG:116906174-116907321
cg18434354	0.11029	0.490289	3.32179	0.00455886	0.204505	-2.6936	0.524755	0.414465	-0.11029	2	121224009	R	II	LOC84931	TSS200	opensea	TSS200-opensea			TRUE
cg05395704	0.132632	0.389344	3.32049	0.00457109	0.204632	-2.69623	0.430792	0.298159	-0.132632	10	77955775	F	II	C10orf11	Body	opensea	Body-opensea			TRUE
cg16630546	0.133192	0.350522	3.31777	0.00459685	0.204702	-2.70175	0.392145	0.258953	-0.133192	3	137564109	F	II		IGR	opensea	IGR-opensea			TRUE
cg15007959	0.103975	0.221316	3.31706	0.0046036	0.204702	-2.70319	0.253808	0.149833	-0.103975	19	50931432	F	I	SPIB	Body	island	Body-island	chr19:50931270-50931638	TRUE
cg22861587	0.103876	0.406862	3.31655	0.00460842	0.204702	-2.70422	0.439324	0.335447	-0.103876	7	91196675	F	II		IGR	opensea	IGR-opensea			TRUE
cg18229092	0.112887	0.759862	3.31649	0.00460901	0.204702	-2.70434	0.795139	0.682252	-0.112887	2	196228235	F	II		IGR	opensea	IGR-opensea			TRUE
cg01482860	-0.107208	0.465561	-3.31604	0.00461328	0.204702	-2.70525	0.432059	0.539267	0.107208	12	49735806	R	II		IGR	island	IGR-island	chr12:49735719-49736875	TRUE
cg14557268	0.107065	0.667317	3.31575	0.00461603	0.204702	-2.70584	0.700774	0.593709	-0.107065	17	29596696	R	II	NF1	Body	opensea	Body-opensea		TRUE	TRUE
cg02711212	0.109362	0.859026	3.31513	0.00462193	0.204702	-2.70709	0.893201	0.783839	-0.109362	15	69854024	F	II	LOC145837	TSS200	opensea	TSS200-opensea
cg02692808	0.102845	0.300791	3.31513	0.00462195	0.204702	-2.7071	0.33293	0.230085	-0.102845	11	121712689	R	II		IGR	opensea	IGR-opensea			TRUE
cg11710851	-0.156924	0.296347	-3.3147	0.00462604	0.204702	-2.70797	0.247308	0.404232	0.156924	12	130765858	F	I		IGR	opensea	IGR-opensea		TRUE
cg26010412	0.110084	0.419085	3.31469	0.00462614	0.204702	-2.70799	0.453486	0.343402	-0.110084	14	47513774	R	II	MDGA2	Body	opensea	Body-opensea			TRUE
cg11007850	0.141546	0.426931	3.31464	0.00462661	0.204702	-2.70809	0.471164	0.329617	-0.141546	2	129216138	F	II		IGR	opensea	IGR-opensea			TRUE
cg19914780	0.102851	0.784376	3.31434	0.00462954	0.204702	-2.70871	0.816517	0.713666	-0.102851	4	79143682	F	II	FRAS1	Body	opensea	Body-opensea			TRUE
cg00089915	-0.129327	0.176704	-3.31409	0.00463187	0.204721	-2.7092	0.136289	0.265617	0.129327	1	66999684	F	II	SGIP1	TSS200	shore	TSS200-shore	chr1:66998728-66999060	TRUE
cg20151476	0.124209	0.776349	3.31349	0.0046376	0.204834	-2.71042	0.815164	0.690955	-0.124209	7	1607408	F	I	PSMG3	Body	shelf	Body-shelf	chr7:1609568-1610037	TRUE	TRUE
cg05510241	0.101832	0.890127	3.31347	0.00463782	0.204834	-2.71046	0.92195	0.820117	-0.101832	7	2499704	F	II		IGR	shore	IGR-shore	chr7:2499905-2500127				rs73279359
cg09828575	0.106471	0.680297	3.31291	0.00464322	0.204857	-2.71161	0.713569	0.607098	-0.106471	12	132663675	R	II		IGR	island	IGR-island	chr12:132663322-132663748
cg10015904	0.105072	0.827648	3.31266	0.00464561	0.204857	-2.71211	0.860483	0.755412	-0.105072	14	79808311	F	II	NRXN3	Body	opensea	Body-opensea			TRUE
cg15186638	-0.105685	0.168806	-3.31199	0.004652	0.204857	-2.71346	0.135779	0.241465	0.105685	8	49231688	R	I		IGR	island	IGR-island	chr8:49231522-49231810
cg17043230	-0.124058	0.64476	-3.31193	0.00465266	0.204862	-2.7136	0.605992	0.73005	0.124058	12	3427729	F	II		IGR	opensea	IGR-opensea					rs10848847
cg06065019	-0.10902	0.236502	-3.31168	0.00465497	0.204862	-2.71409	0.202433	0.311453	0.10902	2	177356276	R	II		IGR	shore	IGR-shore	chr2:177355071-177355525	TRUE
cg23785280	0.115035	0.81835	3.31168	0.00465504	0.204862	-2.7141	0.854298	0.739263	-0.115035	12	27971832	F	II		IGR	opensea	IGR-opensea			TRUE
cg12524428	0.145697	0.467478	3.31119	0.00465971	0.204914	-2.71509	0.513009	0.367311	-0.145697	5	146268595	F	II	PPP2R2B	5'UTR	opensea	5'UTR-opensea			TRUE		rs75481128
cg22133973	0.101875	0.439208	3.311	0.00466161	0.204914	-2.71549	0.471044	0.369169	-0.101875	6	170789640	F	II		IGR	shore	IGR-shore	chr6:170787749-170787985				rs78933183
cg01323104	0.10792	0.508335	3.31057	0.00466571	0.205031	-2.71635	0.54206	0.43414	-0.10792	4	87958903	F	II	AFF1	Body	opensea	Body-opensea			TRUE		rs13136338
cg10919664	-0.188189	0.366688	-3.31003	0.00467094	0.205036	-2.71745	0.307879	0.496068	0.188189	6	28945322	R	I		IGR	opensea	IGR-opensea
cg00744413	0.123405	0.307594	3.30865	0.00468419	0.205311	-2.72023	0.346158	0.222753	-0.123405	15	98196022	R	II		IGR	island	IGR-island	chr15:98196021-98196391
cg05119686	0.117263	0.635223	3.30843	0.00468633	0.205336	-2.72068	0.671868	0.554605	-0.117263	10	31967157	R	II		IGR	opensea	IGR-opensea			TRUE
cg01979888	-0.186409	0.282244	-3.30739	0.00469641	0.205495	-2.72279	0.223992	0.4104	0.186409	12	6665424	F	II	IFFO1	TSS200	shore	TSS200-shore	chr12:6664425-6665336
cg07265549	0.108843	0.734353	3.30705	0.00469973	0.205495	-2.72348	0.768366	0.659523	-0.108843	16	27607018	F	II	KIAA0556	Body	opensea	Body-opensea			TRUE		rs34797869
cg10706013	-0.150306	0.22918	-3.30613	0.0047087	0.205505	-2.72536	0.182209	0.332515	0.150306	21	44104950	F	II	PDE9A	Body	shore	Body-shore	chr21:44105237-44105532	TRUE				rs34599333
cg27467282	0.102641	0.662076	3.30544	0.00471538	0.205505	-2.72675	0.694151	0.59151	-0.102641	13	52116184	R	II		IGR	opensea	IGR-opensea			TRUE
cg03342032	0.112227	0.54194	3.30515	0.00471825	0.205505	-2.72735	0.577011	0.464784	-0.112227	13	94725495	R	II	GPC6	Body	opensea	Body-opensea			TRUE
cg03337218	-0.100821	0.708743	-3.30504	0.00471931	0.205505	-2.72757	0.677236	0.778057	0.100821	10	25189866	F	II	PRTFDC1	Body	opensea	Body-opensea			TRUE
cg17462107	0.100841	0.735039	3.30337	0.00473561	0.205523	-2.73095	0.766552	0.665711	-0.100841	5	66199867	F	II	MAST4	Body	opensea	Body-opensea			TRUE
cg24591770	0.115042	0.394608	3.30228	0.00474624	0.20567	-2.73315	0.430559	0.315517	-0.115042	1	45082704	F	I	RNF220	Body	shore	Body-shore	chr1:45082739-45083285	TRUE
cg05304507	0.111191	0.497456	3.30219	0.00474714	0.20567	-2.73334	0.532204	0.421012	-0.111191	6	116381966	R	I	FRK	TSS200	opensea	TSS200-opensea			TRUE
cg05969496	0.124464	0.785151	3.30218	0.00474722	0.20567	-2.73336	0.824046	0.699582	-0.124464	1	182923750	R	II	C1orf14	TSS1500	shore	TSS1500-shore	chr1:182921819-182922644
cg10814005	-0.115389	0.328786	-3.30199	0.00474914	0.20571	-2.73375	0.292727	0.408116	0.115389	14	91711041	F	II	GPR68	5'UTR	opensea	5'UTR-opensea		TRUE		low-CpG:90780772-90780795	rs2758140
cg21053135	0.116078	0.812619	3.30119	0.00475693	0.205837	-2.73536	0.848893	0.732815	-0.116078	7	150499737	F	II	TMEM176B	TSS1500	shore	TSS1500-shore	chr7:150496809-150498206
cg20892919	0.109007	0.672827	3.30099	0.00475892	0.205837	-2.73577	0.706892	0.597885	-0.109007	12	65927379	R	II		IGR	opensea	IGR-opensea			TRUE
cg18178840	0.105733	0.344138	3.30001	0.00476856	0.205971	-2.73776	0.377179	0.271446	-0.105733	5	81702289	R	II		IGR	opensea	IGR-opensea			TRUE
cg03928154	0.11155	0.47796	3.29993	0.00476936	0.205971	-2.73792	0.51282	0.40127	-0.11155	12	131194179	R	I		IGR	opensea	IGR-opensea
cg11288260	-0.102464	0.153228	-3.29955	0.00477313	0.206068	-2.7387	0.121208	0.223672	0.102464	13	100117058	F	II		IGR	opensea	IGR-opensea			TRUE
cg08329684	0.120281	0.847062	3.29948	0.00477374	0.206068	-2.73882	0.88465	0.764369	-0.120281	16	4932620	R	II	PPL	3'UTR	shore	3'UTR-shore	chr16:4933623-4934563	TRUE	TRUE
cg22143064	0.104061	0.599883	3.29921	0.00477641	0.206088	-2.73937	0.632402	0.528341	-0.104061	2	162948592	R	II		IGR	opensea	IGR-opensea			TRUE
cg12967164	0.127276	0.559082	3.29913	0.00477721	0.206088	-2.73954	0.598856	0.47158	-0.127276	7	1753637	F	I	ELFN1	5'UTR	island	5'UTR-island	chr7:1753446-1753706	TRUE	TRUE		rs4720942
cg27079118	-0.117338	0.153682	-3.29891	0.0047794	0.206088	-2.73999	0.117013	0.234352	0.117338	7	128809298	R	II		IGR	island	IGR-island	chr7:128809089-128809393	TRUE	TRUE
cg21650866	-0.130176	0.186661	-3.29811	0.00478734	0.206177	-2.74162	0.145981	0.276157	0.130176	8	142297256	F	II		IGR	shore	IGR-shore	chr8:142295218-142295879	TRUE
cg25731211	0.149223	0.714543	3.29744	0.00479395	0.206271	-2.74297	0.761175	0.611953	-0.149223	17	79694636	R	I		IGR	opensea	IGR-opensea						rs7406347
cg15717448	0.111484	0.389382	3.29719	0.00479645	0.206273	-2.74348	0.424221	0.312737	-0.111484	5	171234429	R	II		IGR	opensea	IGR-opensea			TRUE
cg00702417	-0.117217	0.579755	-3.29696	0.00479864	0.206273	-2.74393	0.543125	0.660342	0.117217	1	6054867	R	II		IGR	shore	IGR-shore	chr1:6051595-6052955
cg16149077	0.110311	0.603528	3.29675	0.00480075	0.206273	-2.74436	0.638	0.527689	-0.110311	4	54017750	R	II	SCFD2	Body	opensea	Body-opensea			TRUE
cg16430166	-0.145909	0.256751	-3.2966	0.00480224	0.206273	-2.74467	0.211154	0.357063	0.145909	1	232941468	F	I	KIAA1383	1stExon	island	1stExon-island	chr1:232941054-232941707	TRUE	TRUE
cg14752361	0.102525	0.845942	3.29549	0.0048133	0.206418	-2.74692	0.877981	0.775456	-0.102525	7	20205176	F	II	MACC1	5'UTR	opensea	5'UTR-opensea			TRUE		rs12670474
cg18493113	0.139011	0.755917	3.29515	0.00481664	0.206477	-2.74761	0.799358	0.660347	-0.139011	8	90847772	R	II		IGR	opensea	IGR-opensea			TRUE
cg06422039	0.104268	0.540967	3.29329	0.00483521	0.206761	-2.75138	0.573551	0.469282	-0.104268	16	1128698	F	I	SSTR5	TSS200	island	TSS200-island	chr16:1128223-1130394				rs35454254
cg01763290	-0.102068	0.610067	-3.29282	0.00483984	0.206766	-2.75232	0.57817	0.680239	0.102068	17	26366243	R	II		IGR	shelf	IGR-shelf	chr17:26368586-26369133
cg04337594	0.125781	0.800441	3.29226	0.00484547	0.206767	-2.75346	0.839747	0.713966	-0.125781	11	952928	R	II	AP2A2	Body	opensea	Body-opensea			TRUE
cg07236114	0.104299	0.425995	3.29165	0.0048516	0.206768	-2.7547	0.458588	0.354289	-0.104299	11	84254533	R	II	DLG2	Body	opensea	Body-opensea			TRUE
cg08857729	-0.136751	0.254905	-3.29149	0.00485315	0.206768	-2.75502	0.212171	0.348921	0.136751	1	67217826	F	I	TCTEX1D1	TSS1500	shore	TSS1500-shore	chr1:67218079-67218293		TRUE			rs61780944
cg14267222	0.112713	0.690451	3.29102	0.0048579	0.206852	-2.75598	0.725674	0.612961	-0.112713	10	125847615	F	II		IGR	shelf	IGR-shelf	chr10:125851151-125853233
cg25221857	0.101422	0.798482	3.29081	0.00486005	0.206852	-2.75641	0.830176	0.728755	-0.101422	3	135692947	R	II	PPP2R3A	5'UTR	opensea	5'UTR-opensea			TRUE
cg00081417	0.160048	0.47891	3.29019	0.00486619	0.20686	-2.75765	0.528925	0.368876	-0.160048	6	140400137	R	II		IGR	opensea	IGR-opensea			TRUE
cg08869722	-0.114059	0.745025	-3.28991	0.00486904	0.20686	-2.75823	0.709382	0.823441	0.114059	1	76891398	F	II	ST6GALNAC3	Body	opensea	Body-opensea			TRUE
cg02857166	0.105758	0.723046	3.28903	0.00487789	0.206906	-2.76001	0.756095	0.650337	-0.105758	7	43254198	F	II	HECW1	5'UTR	opensea	5'UTR-opensea			TRUE
cg25885280	0.104713	0.55937	3.28879	0.00488028	0.206906	-2.76049	0.592093	0.48738	-0.104713	11	70760166	R	I	SHANK2	Body	opensea	Body-opensea			TRUE
cg02976723	0.114393	0.541621	3.28869	0.00488129	0.206906	-2.76069	0.577369	0.462976	-0.114393	6	3825927	R	I		IGR	opensea	IGR-opensea		TRUE	TRUE
cg09943050	0.132854	0.504412	3.28791	0.00488923	0.206987	-2.76228	0.545929	0.413076	-0.132854	7	83806259	F	II	SEMA3A	Body	opensea	Body-opensea			TRUE			rs78697975
cg10236452	-0.121969	0.192142	-3.28761	0.00489226	0.206987	-2.76289	0.154026	0.275996	0.121969	1	208132590	F	I		IGR	island	IGR-island	chr1:208132327-208133117	TRUE
cg11802925	-0.101677	0.2705	-3.2873	0.00489532	0.207002	-2.76351	0.238726	0.340403	0.101677	X	39865744	F	II		IGR	island	IGR-island	chrX:39864525-39869106	TRUE
cg08723958	0.116228	0.746869	3.28728	0.00489555	0.207002	-2.76355	0.78319	0.666962	-0.116228	1	223018238	F	II		IGR	opensea	IGR-opensea			TRUE		rs2378613
cg26929272	0.111001	0.391116	3.28696	0.00489883	0.207057	-2.76421	0.425803	0.314803	-0.111001	10	88295210	R	I		IGR	island	IGR-island	chr10:88295205-88295592		TRUE
cg14918548	0.109005	0.373622	3.28625	0.00490597	0.207161	-2.76564	0.407687	0.298681	-0.109005	2	101350221	F	II		IGR	opensea	IGR-opensea			TRUE			rs34575989
cg26602558	0.113085	0.700488	3.28583	0.00491023	0.207161	-2.76649	0.735827	0.622742	-0.113085	4	27328217	R	II		IGR	opensea	IGR-opensea			TRUE
cg01000615	-0.191322	0.336339	-3.28579	0.00491063	0.207161	-2.76657	0.276551	0.467873	0.191322	1	145562817	R	II	ANKRD35	Body	opensea	Body-opensea			TRUE
cg07288031	0.110516	0.771803	3.28573	0.00491122	0.207165	-2.76669	0.806339	0.695823	-0.110516	16	77370171	R	II	ADAMTS18	Body	opensea	Body-opensea			TRUE
cg07581680	0.103509	0.692276	3.28501	0.00491858	0.207235	-2.76816	0.724623	0.621114	-0.103509	2	196961847	F	II		IGR	opensea	IGR-opensea			TRUE
cg13642436	0.11425	0.507036	3.28319	0.00493707	0.207403	-2.77184	0.542739	0.428489	-0.11425	5	128017907	R	II		IGR	opensea	IGR-opensea			TRUE
cg24475598	0.103441	0.550466	3.28243	0.00494485	0.207585	-2.77338	0.582791	0.479351	-0.103441	2	221712289	F	II		IGR	opensea	IGR-opensea			TRUE
cg15417875	0.113932	0.829923	3.28219	0.00494723	0.207643	-2.77386	0.865526	0.751595	-0.113932	12	122396687	F	I	WDR66	Body	opensea	Body-opensea			TRUE
cg07341778	0.101194	0.74955	3.28193	0.00494988	0.2077	-2.77438	0.781174	0.679979	-0.101194	5	37072108	F	II		IGR	opensea	IGR-opensea			TRUE
cg12405983	-0.123255	0.779554	-3.28154	0.0049539	0.2077	-2.77518	0.741037	0.864292	0.123255	19	58630240	F	II	ZSCAN18	TSS1500	island	TSS1500-island	chr19:58629309-58630241
cg20874785	-0.105333	0.427209	-3.28151	0.00495424	0.2077	-2.77524	0.394293	0.499626	0.105333	2	74612674	F	II	LOC100189589	TSS200	opensea	TSS200-opensea					rs73948791	rs76426482
cg08573701	0.107701	0.868925	3.28044	0.00496518	0.207819	-2.77741	0.902581	0.79488	-0.107701	8	53603035	F	II	RB1CC1	5'UTR	opensea	5'UTR-opensea			TRUE
cg26373351	0.125973	0.648956	3.28035	0.00496614	0.207819	-2.7776	0.688323	0.562349	-0.125973	12	12031304	F	II	ETV6	Body	opensea	Body-opensea		TRUE	TRUE
cg14549078	0.132657	0.586284	3.28032	0.00496644	0.207819	-2.77766	0.62774	0.495082	-0.132657	15	48752032	F	II	FBN1	Body	opensea	Body-opensea			TRUE
cg24393844	0.122655	0.631067	3.28011	0.00496852	0.207819	-2.77807	0.669397	0.546742	-0.122655	12	68115110	R	II		IGR	opensea	IGR-opensea			TRUE
cg02639181	0.121594	0.616974	3.27957	0.00497414	0.207819	-2.77918	0.654972	0.533378	-0.121594	2	8978042	F	I	KIDINS220	TSS1500	shore	TSS1500-shore	chr2:8977373-8977789
cg13324902	0.165824	0.780264	3.27848	0.00498526	0.207945	-2.78137	0.832084	0.66626	-0.165824	15	26360752	R	II		IGR	opensea	IGR-opensea
cg18363911	0.186081	0.724712	3.27819	0.00498826	0.207945	-2.78196	0.782863	0.596781	-0.186081	6	170479840	R	I		IGR	opensea	IGR-opensea
cg00174508	0.102788	0.396494	3.27773	0.004993	0.207946	-2.78289	0.428615	0.325828	-0.102788	12	107774298	F	II	BTBD11	Body	opensea	Body-opensea			TRUE
cg00066854	-0.105982	0.697761	-3.27382	0.00503349	0.208363	-2.79081	0.664642	0.770624	0.105982	10	113987376	F	II		IGR	opensea	IGR-opensea				low-CpG:113977362-113977430	rs79490708
cg01229760	0.10095	0.90153	3.27339	0.00503796	0.208363	-2.79168	0.933077	0.832127	-0.10095	11	7728104	F	II	OVCH2	TSS200	opensea	TSS200-opensea					rs7926546
cg01169559	0.105471	0.420884	3.27269	0.00504528	0.208363	-2.79311	0.453844	0.348372	-0.105471	10	831247	F	I		IGR	opensea	IGR-opensea		TRUE
cg10693635	-0.139777	0.25479	-3.27204	0.00505205	0.208363	-2.79442	0.21111	0.350887	0.139777	6	16215614	R	II		IGR	opensea	IGR-opensea		TRUE	TRUE
cg25381747	0.113944	0.595622	3.27199	0.00505253	0.208363	-2.79451	0.63123	0.517286	-0.113944	10	115425899	F	II		IGR	opensea	IGR-opensea			TRUE
cg07914866	-0.161331	0.352501	-3.27171	0.00505542	0.208363	-2.79507	0.302085	0.463416	0.161331	12	66583431	R	II	IRAK3	Body	shore	Body-shore	chr12:66582695-66583345	TRUE
cg12417667	0.103052	0.746893	3.26967	0.00507682	0.208588	-2.79922	0.779097	0.676044	-0.103052	12	53659765	F	II		IGR	shelf	IGR-shelf	chr12:53661928-53662429
cg24003542	-0.184294	0.132074	-3.26942	0.00507943	0.208588	-2.79972	0.0744821	0.258776	0.184294	5	112630684	R	II	MCC	TSS200	shore	TSS200-shore	chr5:112630219-112630624			high-CpG:112658245-112658598
cg14833891	0.117413	0.531494	3.26931	0.00508053	0.208588	-2.79993	0.568186	0.450772	-0.117413	7	45188085	F	I		IGR	opensea	IGR-opensea
cg08866991	0.166492	0.507995	3.26912	0.00508257	0.208588	-2.80033	0.560024	0.393532	-0.166492	17	77111749	R	I	HRNBP3	Body	opensea	Body-opensea		TRUE	TRUE
cg26814987	0.132115	0.409969	3.26894	0.00508445	0.208588	-2.80069	0.451255	0.31914	-0.132115	12	124773668	F	I	FAM101A	TSS200	opensea	TSS200-opensea			TRUE		rs11834869
cg15224059	0.126458	0.814507	3.26889	0.00508494	0.208588	-2.80078	0.854025	0.727567	-0.126458	5	125684670	R	II		IGR	opensea	IGR-opensea			TRUE
cg12480053	-0.131256	0.555811	-3.2688	0.00508586	0.208588	-2.80096	0.514794	0.64605	0.131256	13	105792346	F	II		IGR	opensea	IGR-opensea
cg14543953	0.115255	0.776736	3.26844	0.00508969	0.208588	-2.8017	0.812753	0.697498	-0.115255	11	102669090	R	II	MMP1	TSS200	opensea	TSS200-opensea			TRUE
cg09932730	0.102425	0.54368	3.26772	0.00509724	0.208661	-2.80315	0.575688	0.473262	-0.102425	7	135198360	F	II		IGR	shelf	IGR-shelf	chr7:135194567-135195309
cg19241878	0.112228	0.671884	3.26726	0.00510212	0.208677	-2.80409	0.706956	0.594728	-0.112228	17	48846189	R	II	C17orf73	TSS1500	opensea	TSS1500-opensea
cg07783843	-0.124955	0.400432	-3.2671	0.00510378	0.208677	-2.80441	0.361384	0.486339	0.124955	2	176997311	F	II		IGR	shore	IGR-shore	chr2:176993479-176995557
cg12192282	0.107625	0.405976	3.26685	0.00510647	0.208677	-2.80493	0.439609	0.331983	-0.107625	2	143632190	F	II		IGR	opensea	IGR-opensea			TRUE
cg11525020	0.115825	0.445646	3.26582	0.0051173	0.208677	-2.807	0.481842	0.366017	-0.115825	20	17674233	F	II	BANF2	TSS200	opensea	TSS200-opensea
cg24313303	-0.114279	0.186577	-3.2654	0.00512175	0.208677	-2.80786	0.150864	0.265143	0.114279	1	27113219	F	II	PIGV	TSS1500	shore	TSS1500-shore	chr1:27114118-27114692
cg06968741	0.113002	0.798391	3.26495	0.00512649	0.208677	-2.80876	0.833705	0.720702	-0.113002	1	236848682	F	II	ACTN2	TSS1500	shore	TSS1500-shore	chr1:236849472-236850323
cg22920501	-0.171512	0.212436	-3.26455	0.00513072	0.208677	-2.80957	0.158839	0.330351	0.171512	2	26401640	R	I	FAM59B	Body	shore	Body-shore	chr2:26401695-26402099	TRUE	TRUE
cg08233909	0.100668	0.665882	3.2643	0.00513332	0.208677	-2.81007	0.697341	0.596673	-0.100668	3	157221198	R	II	VEPH1	TSS200	opensea	TSS200-opensea
cg02557652	0.107263	0.787869	3.26163	0.00516174	0.208724	-2.81548	0.821389	0.714126	-0.107263	15	89741016	F	II	ABHD2	3'UTR	opensea	3'UTR-opensea		TRUE	TRUE
cg11117717	0.117829	0.796448	3.26137	0.00516445	0.208744	-2.816	0.83327	0.715441	-0.117829	14	31560529	R	II	AP4S1	Body	opensea	Body-opensea			TRUE
cg12461281	0.125284	0.671762	3.2608	0.00517058	0.208768	-2.81716	0.710914	0.58563	-0.125284	5	148288661	F	II		IGR	opensea	IGR-opensea			TRUE		rs73278685
cg23331303	0.10815	0.564218	3.26006	0.00517847	0.208813	-2.81865	0.598015	0.489865	-0.10815	5	5135948	R	II		IGR	shelf	IGR-shelf	chr5:5139441-5140941
cg20970886	0.10075	0.51263	3.25979	0.00518137	0.208837	-2.8192	0.544115	0.443365	-0.10075	3	192568714	F	II	C3orf59	Body	opensea	Body-opensea			TRUE
cg10149533	0.100808	0.464702	3.25882	0.0051918	0.208845	-2.82117	0.496204	0.395396	-0.100808	4	154064784	F	II		IGR	opensea	IGR-opensea			TRUE		rs34543003
cg06287775	0.183146	0.608924	3.25742	0.00520676	0.208927	-2.82399	0.666157	0.483011	-0.183146	7	4784174	R	I	FOXK1	Body	shore	Body-shore	chr7:4784820-4785058		TRUE
cg27582696	0.102393	0.768465	3.2571	0.00521018	0.208951	-2.82464	0.800463	0.69807	-0.102393	6	13876469	R	II		IGR	shelf	IGR-shelf	chr6:13873765-13874262
cg07675184	-0.129224	0.323243	-3.25667	0.0052148	0.209039	-2.82551	0.282861	0.412085	0.129224	10	119296612	R	I	EMX2OS	Body	island	Body-island	chr10:119293917-119297675	TRUE
cg22844368	0.105869	0.685925	3.25627	0.00521918	0.209039	-2.82633	0.719009	0.613141	-0.105869	19	54177252	R	II	MIR498	TSS200	opensea	TSS200-opensea
cg09355528	0.107606	0.42861	3.25543	0.00522818	0.209142	-2.82802	0.462237	0.354631	-0.107606	10	71712830	F	I	COL13A1	Body	opensea	Body-opensea			TRUE
cg25351606	-0.104492	0.517867	-3.25536	0.00522893	0.209142	-2.82816	0.485214	0.589706	0.104492	6	100917427	F	I		IGR	island	IGR-island	chr6:100917205-100917523
cg16653901	0.113038	0.485408	3.25523	0.0052304	0.209142	-2.82843	0.520732	0.407694	-0.113038	5	133513511	R	I	SKP1	TSS1500	shore	TSS1500-shore	chr5:133511971-133512902
cg20173428	0.117962	0.650559	3.25218	0.00526336	0.209491	-2.83459	0.687422	0.56946	-0.117962	12	108167502	F	II	ASCL4	TSS1500	shore	TSS1500-shore	chr12:108168986-108169570
cg19603903	-0.152211	0.664498	-3.25216	0.0052636	0.209491	-2.83464	0.616932	0.769143	0.152211	19	57742345	F	II	AURKC	TSS200	island	TSS200-island	chr19:57741955-57742457
cg21119127	0.123625	0.694476	3.25108	0.00527532	0.209669	-2.83681	0.733109	0.609484	-0.123625	13	46297726	F	II		IGR	opensea	IGR-opensea			TRUE
cg23008238	0.107012	0.611161	3.24989	0.00528829	0.20975	-2.83922	0.644602	0.53759	-0.107012	5	2112459	F	I		IGR	island	IGR-island	chr5:2111836-2112484
cg04550626	0.10468	0.849353	3.24951	0.00529242	0.209844	-2.83999	0.882065	0.777386	-0.10468	10	74118550	R	II		IGR	shelf	IGR-shelf	chr10:74113815-74114792
cg03151294	0.105915	0.645574	3.2485	0.00530348	0.210026	-2.84203	0.678672	0.572758	-0.105915	4	189220624	R	II		IGR	opensea	IGR-opensea			TRUE
cg12404168	0.121257	0.32105	3.24824	0.00530637	0.210068	-2.84256	0.358942	0.237686	-0.121257	13	91370196	R	II		IGR	opensea	IGR-opensea			TRUE
cg04334016	0.10061	0.3851	3.24819	0.00530688	0.210068	-2.84266	0.416541	0.315931	-0.10061	6	154769781	R	II	CNKSR3	Body	opensea	Body-opensea		TRUE	TRUE
cg25132662	0.103222	0.618052	3.24817	0.00530705	0.210068	-2.84269	0.650309	0.547087	-0.103222	1	218537543	F	II	TGFB2	Body	opensea	Body-opensea			TRUE		rs12093477
cg09651136	0.118982	0.689898	3.24793	0.0053097	0.210153	-2.84318	0.72708	0.608098	-0.118982	15	72525012	F	II	PKM2	TSS1500	shore	TSS1500-shore	chr15:72522131-72524238
cg20199836	0.112113	0.524081	3.24745	0.00531501	0.210242	-2.84416	0.559116	0.447003	-0.112113	19	35940425	R	II	FFAR2	TSS200	opensea	TSS200-opensea
cg04472725	-0.107623	0.103353	-3.24705	0.00531938	0.210242	-2.84496	0.0697211	0.177344	0.107623	3	141516232	F	II	GRK7	Body	island	Body-island	chr3:141516055-141516639		TRUE
cg21029631	0.120899	0.347945	3.24687	0.0053214	0.210242	-2.84534	0.385726	0.264827	-0.120899	2	240752524	F	I		IGR	opensea	IGR-opensea			TRUE
cg18371700	-0.102585	0.244423	-3.24683	0.00532183	0.210242	-2.84542	0.212365	0.31495	0.102585	21	36041579	F	II	CLIC6	TSS200	island	TSS200-island	chr21:36041305-36043224
cg09610644	0.112342	0.759602	3.24659	0.00532443	0.210242	-2.84589	0.794708	0.682367	-0.112342	3	197249274	R	II	BDH1	Body	opensea	Body-opensea			TRUE
cg01485975	0.118589	0.848197	3.24643	0.00532615	0.210245	-2.84621	0.885256	0.766667	-0.118589	5	156486186	R	II	HAVCR1	TSS1500	opensea	TSS1500-opensea
cg23194912	0.139939	0.534926	3.24529	0.0053387	0.210286	-2.84852	0.578656	0.438718	-0.139939	2	3934048	F	I		IGR	opensea	IGR-opensea
cg19682367	0.112455	0.604553	3.2445	0.00534744	0.210421	-2.85012	0.639695	0.527239	-0.112455	3	188888486	F	II	TPRG1	TSS1500	opensea	TSS1500-opensea
cg26158270	0.110709	0.522525	3.24441	0.00534843	0.210421	-2.8503	0.557121	0.446412	-0.110709	11	12309622	F	II	MICALCL	5'UTR	opensea	5'UTR-opensea			TRUE			rs77940180
cg10601287	-0.128923	0.419995	-3.24362	0.00535712	0.210582	-2.85189	0.379706	0.508629	0.128923	11	119293861	F	I	THY1	1stExon	island	1stExon-island	chr11:119293320-119293943	TRUE
cg06021990	0.125678	0.448693	3.24352	0.00535827	0.210582	-2.8521	0.487967	0.36229	-0.125678	13	28912746	F	II	FLT1	Body	opensea	Body-opensea			TRUE
cg02794695	-0.110222	0.525842	-3.24165	0.005379	0.210881	-2.85589	0.491398	0.60162	0.110222	8	134072611	F	II	SLA	TSS200	opensea	TSS200-opensea
cg22722777	0.103391	0.539057	3.24135	0.0053823	0.210881	-2.85648	0.571367	0.467975	-0.103391	4	87427887	R	II		IGR	opensea	IGR-opensea			TRUE
cg00697440	0.10064	0.682288	3.24128	0.00538312	0.210881	-2.85663	0.713738	0.613098	-0.10064	3	121795768	R	II	CD86	TSS1500	opensea	TSS1500-opensea						rs36226874
cg04343101	0.13	0.388515	3.24089	0.00538739	0.210928	-2.85741	0.42914	0.29914	-0.13	16	1238642	F	I	CACNA1H	Body	shore	Body-shore	chr16:1235938-1237262	TRUE			rs78830867
cg26608486	0.128812	0.813765	3.24044	0.00539238	0.211001	-2.85832	0.854019	0.725207	-0.128812	16	88482341	F	I		IGR	opensea	IGR-opensea		TRUE
cg14815891	-0.170064	0.429119	-3.23995	0.00539789	0.211001	-2.85932	0.375974	0.546038	0.170064	20	29611903	R	I	FRG1B	Body	island	Body-island	chr20:29611520-29612357	TRUE		high-CpG:28225511-28225662		rs34747756
cg26570574	0.10467	0.798945	3.23986	0.00539882	0.211001	-2.85949	0.831654	0.726985	-0.10467	1	220415655	R	II	RAB3GAP2	Body	opensea	Body-opensea			TRUE
cg15293629	0.108321	0.632679	3.23985	0.005399	0.211001	-2.85952	0.66653	0.558209	-0.108321	2	173995795	F	II	ZAK	Body	opensea	Body-opensea			TRUE
cg21383284	0.112984	0.78853	3.23903	0.00540808	0.211001	-2.86117	0.823838	0.710854	-0.112984	2	20826833	R	II	HS1BP3	Body	opensea	Body-opensea			TRUE
cg23128495	0.104987	0.549621	3.23901	0.00540836	0.211001	-2.86122	0.58243	0.477442	-0.104987	12	106254483	R	II		IGR	opensea	IGR-opensea			TRUE
cg26318441	-0.105664	0.184341	-3.23871	0.00541167	0.211007	-2.86182	0.151321	0.256985	0.105664	X	9753940	F	I	SHROOM2	TSS1500	island	TSS1500-island	chrX:9753566-9755101	TRUE
cg18104070	0.124732	0.474155	3.23815	0.00541795	0.211018	-2.86295	0.513134	0.388402	-0.124732	2	205333978	R	II		IGR	opensea	IGR-opensea			TRUE			rs34072327
cg04450857	-0.125574	0.538707	-3.23807	0.00541882	0.211018	-2.86311	0.499465	0.625039	0.125574	10	119296756	R	II	EMX2OS	Body	island	Body-island	chr10:119293917-119297675	TRUE
cg03946532	0.114123	0.871717	3.23764	0.00542363	0.211069	-2.86398	0.907381	0.793258	-0.114123	16	79344736	R	II		IGR	opensea	IGR-opensea			TRUE
cg25722073	0.100591	0.768867	3.23694	0.0054315	0.211213	-2.8654	0.800301	0.699711	-0.100591	1	172351357	F	II	DNM3	Body	opensea	Body-opensea			TRUE
cg08170294	0.128604	0.763836	3.23551	0.00544749	0.211512	-2.86828	0.804025	0.675421	-0.128604	17	74134843	R	II	FOXJ1	Body	shore	Body-shore	chr17:74135922-74137802	TRUE	TRUE
cg12940747	-0.102639	0.510526	-3.23535	0.00544932	0.211512	-2.86861	0.478451	0.58109	0.102639	11	128595713	R	II	FLI1	Body	opensea	Body-opensea			TRUE
cg23005797	0.106277	0.710388	3.2349	0.00545445	0.211551	-2.86953	0.7436	0.637323	-0.106277	2	10302462	R	I	C2orf48	Body	opensea	Body-opensea		TRUE
cg13177421	0.10595	0.722168	3.23486	0.00545481	0.211551	-2.86959	0.755277	0.649328	-0.10595	12	15773876	R	II	EPS8	3'UTR	opensea	3'UTR-opensea			TRUE
cg11843623	0.120356	0.531228	3.23315	0.00547409	0.211742	-2.87305	0.568839	0.448483	-0.120356	6	133188565	R	II		IGR	opensea	IGR-opensea
cg15226275	0.119728	0.457411	3.23297	0.00547617	0.211742	-2.87342	0.494826	0.375098	-0.119728	6	116381976	R	I	FRK	TSS200	opensea	TSS200-opensea			TRUE
cg25243082	-0.157521	0.435558	-3.2323	0.00548367	0.211896	-2.87476	0.386332	0.543853	0.157521	4	40267141	F	I		IGR	opensea	IGR-opensea			TRUE
cg13924998	0.117692	0.581345	3.23106	0.00549771	0.212126	-2.87727	0.618124	0.500432	-0.117692	7	41531155	R	II		IGR	opensea	IGR-opensea			TRUE
cg23023604	0.13076	0.565844	3.23063	0.00550267	0.212126	-2.87815	0.606707	0.475947	-0.13076	3	15915216	F	II	MIR563	TSS200	opensea	TSS200-opensea
cg21079030	0.107934	0.54842	3.23026	0.00550689	0.212126	-2.8789	0.582149	0.474215	-0.107934	5	2225401	F	II		IGR	opensea	IGR-opensea					rs80117237
cg02498174	0.134367	0.568162	3.23018	0.00550777	0.212126	-2.87906	0.610152	0.475785	-0.134367	5	39518835	R	II		IGR	opensea	IGR-opensea			TRUE
cg12707343	0.118063	0.435273	3.22927	0.00551815	0.212215	-2.8809	0.472168	0.354105	-0.118063	6	168418439	F	I	KIF25	TSS200	opensea	TSS200-opensea
cg03302448	0.143116	0.769037	3.22889	0.00552237	0.212242	-2.88165	0.81376	0.670644	-0.143116	10	11046334	R	II	CUGBP2	TSS1500	opensea	TSS1500-opensea
cg13227806	0.101078	0.438629	3.22824	0.00552981	0.212315	-2.88297	0.470216	0.369138	-0.101078	3	113811946	R	II		IGR	opensea	IGR-opensea			TRUE
cg10553103	-0.106948	0.37028	-3.22759	0.00553725	0.212369	-2.88428	0.336859	0.443806	0.106948	5	140619567	R	II	PCDHB19P	TSS200	shore	TSS200-shore	chr5:140620864-140621698
cg25091228	0.132217	0.563922	3.22735	0.00554002	0.212369	-2.88477	0.60524	0.473023	-0.132217	5	67586433	F	II	PIK3R1	TSS200	shore	TSS200-shore	chr5:67584213-67584451		TRUE
cg15102749	0.106068	0.787555	3.22722	0.00554144	0.212369	-2.88502	0.820701	0.714633	-0.106068	11	66510893	F	II	C11orf80	TSS1500	shore	TSS1500-shore	chr11:66511803-66512719
cg13531977	0.115591	0.795967	3.22687	0.00554544	0.212377	-2.88573	0.832089	0.716498	-0.115591	9	112013420	R	II	EPB41L4B	Body	opensea	Body-opensea			TRUE
cg03124214	0.120384	0.690998	3.22686	0.00554559	0.212377	-2.88576	0.728618	0.608234	-0.120384	16	14622500	F	I	PARN	Body	opensea	Body-opensea			TRUE
cg22162694	0.103156	0.876788	3.22679	0.00554638	0.212388	-2.8859	0.909025	0.805868	-0.103156	13	24323408	R	II	MIPEP	Body	opensea	Body-opensea			TRUE
cg09712066	0.115996	0.64504	3.22626	0.00555249	0.212449	-2.88697	0.681289	0.565293	-0.115996	5	59783629	R	II	PART1	TSS200	opensea	TSS200-opensea
cg09449543	0.125176	0.816056	3.22553	0.00556083	0.212483	-2.88844	0.855174	0.729998	-0.125176	7	69246130	R	II	AUTS2	Body	opensea	Body-opensea			TRUE
cg09795588	-0.11567	0.172104	-3.22503	0.00556658	0.212562	-2.88945	0.135957	0.251628	0.11567	10	23479993	F	I	PTF1A	TSS1500	shore	TSS1500-shore	chr10:23480697-23482455				rs35423472
cg04482892	0.109074	0.33977	3.22472	0.00557016	0.2126	-2.89008	0.373856	0.264782	-0.109074	13	20703371	R	I		IGR	shore	IGR-shore	chr13:20701817-20702634				rs4769949
cg09089894	0.106282	0.544037	3.22427	0.00557533	0.212684	-2.89099	0.57725	0.470968	-0.106282	12	75043991	R	II		IGR	opensea	IGR-opensea			TRUE
cg02052265	-0.109207	0.549917	-3.22393	0.0055792	0.212735	-2.89167	0.51579	0.624996	0.109207	1	247712110	F	II	C1orf150	TSS1500	opensea	TSS1500-opensea
cg12979789	0.104628	0.683733	3.22352	0.00558396	0.212799	-2.89251	0.71643	0.611801	-0.104628	3	68047840	R	II		IGR	opensea	IGR-opensea			TRUE
cg20343827	0.129109	0.656819	3.22322	0.00558741	0.212836	-2.89311	0.697165	0.568057	-0.129109	13	107869769	R	II	FAM155A	Body	opensea	Body-opensea			TRUE
cg07318609	-0.114919	0.223286	-3.22253	0.00559534	0.212908	-2.8945	0.187374	0.302293	0.114919	10	128585354	R	II		IGR	opensea	IGR-opensea
cg27228272	0.103735	0.533437	3.22195	0.00560198	0.212908	-2.89566	0.565854	0.462119	-0.103735	2	127772338	F	II		IGR	opensea	IGR-opensea		TRUE	TRUE		rs67396441
cg12737514	-0.127665	0.178304	-3.22186	0.00560307	0.212908	-2.89585	0.138409	0.266074	0.127665	X	40005177	F	I	BCOR	5'UTR	island	5'UTR-island	chrX:40005040-40007066	TRUE
cg14412111	0.10469	0.396095	3.22172	0.00560467	0.212908	-2.89613	0.428811	0.324121	-0.10469	7	91522266	R	II		IGR	opensea	IGR-opensea			TRUE
cg12244665	0.104989	0.765418	3.22052	0.00561861	0.212908	-2.89856	0.798227	0.693238	-0.104989	8	104325860	R	II	FZD6	Body	opensea	Body-opensea			TRUE
cg27597459	-0.118067	0.563793	-3.22038	0.00562017	0.212908	-2.89883	0.526897	0.644964	0.118067	5	178204766	R	II	AACSL	TSS1500	opensea	TSS1500-opensea
cg16862361	0.121283	0.778156	3.22019	0.00562241	0.212916	-2.89922	0.816057	0.694774	-0.121283	2	31637622	F	II	XDH	TSS200	opensea	TSS200-opensea				low-CpG:31491057-31491128
cg10946573	0.110481	0.608128	3.22	0.00562459	0.212922	-2.8996	0.642654	0.532172	-0.110481	11	84635788	F	II	DLG2	TSS1500	opensea	TSS1500-opensea
cg13871843	0.131804	0.765593	3.21929	0.00563286	0.213101	-2.90104	0.806781	0.674977	-0.131804	1	9887984	F	II		IGR	shelf	IGR-shelf	chr1:9883011-9884667
cg21568145	0.131925	0.255283	3.21912	0.00563487	0.21312	-2.90139	0.29651	0.164585	-0.131925	19	47507399	R	I	GRLF1	3'UTR	island	3'UTR-island	chr19:47507306-47507692	TRUE	TRUE
cg06553513	0.120024	0.700069	3.21907	0.00563543	0.213122	-2.90149	0.737576	0.617552	-0.120024	10	131193272	R	II		IGR	opensea	IGR-opensea
cg25950769	0.104529	0.611025	3.21885	0.00563794	0.213178	-2.90192	0.64369	0.539161	-0.104529	15	85945991	F	II	AKAP13	5'UTR	opensea	5'UTR-opensea			TRUE
cg02897667	-0.127401	0.29616	-3.21858	0.00564113	0.2132	-2.90248	0.256348	0.383748	0.127401	7	51539131	R	II		IGR	opensea	IGR-opensea			TRUE
cg17668981	0.128582	0.680611	3.21771	0.0056512	0.213222	-2.90422	0.720793	0.592211	-0.128582	5	138617804	F	II	MATR3	5'UTR	opensea	5'UTR-opensea			TRUE
cg10748359	0.122576	0.404694	3.21767	0.00565167	0.213222	-2.90431	0.442999	0.320423	-0.122576	11	100211450	F	II	CNTN5	Body	opensea	Body-opensea			TRUE
cg03899412	0.105536	0.616486	3.21727	0.00565636	0.213233	-2.90512	0.649466	0.54393	-0.105536	5	3325319	R	II		IGR	shore	IGR-shore	chr5:3326328-3326645
cg14847662	0.107415	0.738939	3.21725	0.00565654	0.213233	-2.90515	0.772506	0.665091	-0.107415	6	131350835	R	II	EPB41L2	5'UTR	opensea	5'UTR-opensea			TRUE
cg27656754	0.108139	0.845755	3.21675	0.00566246	0.213318	-2.90617	0.879548	0.771409	-0.108139	6	137366492	R	II	IL20RA	TSS200	shore	TSS200-shore	chr6:137365299-137366126
cg19312667	-0.142028	0.164905	-3.21649	0.00566546	0.213318	-2.90669	0.120521	0.262549	0.142028	4	25090491	F	II		IGR	island	IGR-island	chr4:25090106-25090510		TRUE
cg06102602	0.104259	0.572229	3.21625	0.00566831	0.213376	-2.90718	0.60481	0.50055	-0.104259	12	96895446	R	II		IGR	opensea	IGR-opensea			TRUE
cg12615903	0.105657	0.84356	3.21616	0.00566931	0.213379	-2.90736	0.876578	0.770921	-0.105657	10	126278372	R	II	LHPP	Body	island	Body-island	chr10:126278298-126278503	TRUE	TRUE
cg20074526	0.125712	0.624425	3.21598	0.00567141	0.213413	-2.90772	0.66371	0.537998	-0.125712	3	194754642	F	II		IGR	opensea	IGR-opensea		TRUE	TRUE		rs34596395
cg03630736	0.106539	0.562695	3.21585	0.00567291	0.213413	-2.90798	0.595989	0.48945	-0.106539	17	74069290	R	I	SRP68	TSS1500	shore	TSS1500-shore	chr17:74070404-74073530
cg06041852	0.101821	0.584418	3.21529	0.00567955	0.213542	-2.90912	0.616236	0.514416	-0.101821	10	134734134	F	I		IGR	shore	IGR-shore	chr10:134735972-134736254
cg23240145	0.112578	0.513655	3.21461	0.00568752	0.213682	-2.91049	0.548836	0.436258	-0.112578	13	70682771	F	II	KLHL1	TSS200	shore	TSS200-shore	chr13:70681732-70682219
cg17105014	-0.1009	0.40325	-3.2138	0.00569698	0.213798	-2.91212	0.371719	0.472619	0.1009	2	127413363	F	II	GYPC	TSS1500	shore	TSS1500-shore	chr2:127413696-127414171	TRUE
cg21279316	-0.105519	0.261264	-3.21345	0.00570111	0.213801	-2.91283	0.228289	0.333808	0.105519	15	64915229	R	II	ZNF609	Body	opensea	Body-opensea			TRUE
cg02487331	0.161199	0.562371	3.21284	0.00570825	0.213914	-2.91405	0.612746	0.451547	-0.161199	1	146550467	F	II		IGR	island	IGR-island	chr1:146550290-146551260
cg20892840	0.108485	0.556653	3.21269	0.00571	0.213922	-2.91435	0.590554	0.48207	-0.108485	3	156879058	R	II	CCNL1	TSS1500	shore	TSS1500-shore	chr3:156877175-156878364
cg00909806	0.103607	0.338209	3.21256	0.00571157	0.213922	-2.91462	0.370586	0.26698	-0.103607	1	212688762	F	II		IGR	shore	IGR-shore	chr1:212688031-212688448		TRUE		rs57377970
cg14157824	0.110009	0.775795	3.21222	0.00571552	0.214011	-2.9153	0.810172	0.700164	-0.110009	2	223735640	F	II	ACSL3	5'UTR	opensea	5'UTR-opensea			TRUE		rs73991921
cg21821315	0.101935	0.687991	3.21126	0.00572695	0.21402	-2.91725	0.719846	0.617911	-0.101935	12	54959611	R	II	PDE1B	Body	opensea	Body-opensea			TRUE
cg26073856	0.14957	0.562357	3.21051	0.00573572	0.21402	-2.91875	0.609097	0.459527	-0.14957	4	120243555	F	II	FABP2	TSS1500	opensea	TSS1500-opensea					rs13306351
cg06960164	-0.120277	0.303581	-3.20948	0.0057479	0.214085	-2.92083	0.265994	0.386272	0.120277	6	42072147	R	II	C6orf132	Body	island	Body-island	chr6:42072032-42072701	TRUE
cg19975218	0.112473	0.584737	3.20869	0.00575735	0.214146	-2.92244	0.619885	0.507412	-0.112473	2	173599732	F	II	LOC91149	Body	shore	Body-shore	chr2:173600281-173600970	TRUE
cg19566906	0.101444	0.642869	3.20862	0.00575821	0.214146	-2.92258	0.67457	0.573126	-0.101444	4	79971235	F	II		IGR	opensea	IGR-opensea					rs74644704
cg23074992	-0.106338	0.535124	-3.20787	0.0057671	0.21426	-2.92409	0.501893	0.608231	0.106338	14	95237386	R	II	GSC	TSS1500	shore	TSS1500-shore	chr14:95237622-95238211		TRUE
cg16325174	0.102555	0.4716	3.2076	0.00577027	0.21426	-2.92463	0.503649	0.401094	-0.102555	13	108365238	F	II	FAM155A	Body	opensea	Body-opensea			TRUE
cg08797444	0.124755	0.726935	3.20707	0.0057766	0.21426	-2.9257	0.765921	0.641167	-0.124755	10	116384079	R	II	ABLIM1	Body	opensea	Body-opensea			TRUE
cg00995893	0.116237	0.696727	3.20635	0.00578515	0.21426	-2.92715	0.733051	0.616814	-0.116237	13	45676585	R	II		IGR	opensea	IGR-opensea			TRUE
cg07310849	0.103066	0.884608	3.20601	0.00578919	0.21426	-2.92783	0.916816	0.81375	-0.103066	2	130512158	R	II		IGR	opensea	IGR-opensea
cg04341343	-0.112379	0.605195	-3.20566	0.00579339	0.21426	-2.92854	0.570077	0.682456	0.112379	2	8784813	R	II		IGR	shore	IGR-shore	chr2:8785459-8786072
cg08453811	0.112617	0.719058	3.20401	0.00581313	0.21426	-2.93187	0.754251	0.641634	-0.112617	13	112144769	F	II		IGR	opensea	IGR-opensea
cg02995791	0.120659	0.744385	3.20395	0.00581382	0.21426	-2.93199	0.782091	0.661432	-0.120659	10	3559223	R	I		IGR	opensea	IGR-opensea
cg02572796	0.121919	0.73803	3.20369	0.00581701	0.21426	-2.93252	0.77613	0.654211	-0.121919	4	186732124	R	II	SORBS2	5'UTR	opensea	5'UTR-opensea			TRUE
cg18318006	0.132824	0.519441	3.2026	0.00583001	0.21426	-2.93471	0.560949	0.428124	-0.132824	10	97169147	F	II	SORBS1	Body	opensea	Body-opensea			TRUE
cg04361266	0.112296	0.690228	3.20257	0.00583041	0.21426	-2.93477	0.72532	0.613024	-0.112296	16	20910376	F	II	LYRM1	TSS1500	shore	TSS1500-shore	chr16:20911566-20912616
cg15197050	0.145323	0.650553	3.20221	0.0058348	0.21426	-2.93551	0.695966	0.550643	-0.145323	10	128528216	F	II		IGR	opensea	IGR-opensea			TRUE		rs4962369
cg15653254	0.104935	0.492017	3.20165	0.00584148	0.214283	-2.93663	0.524809	0.419874	-0.104935	2	227448670	F	II		IGR	opensea	IGR-opensea		TRUE	TRUE		rs79448656
cg03627738	0.116281	0.793223	3.20146	0.0058438	0.214318	-2.93702	0.829561	0.71328	-0.116281	10	80477516	F	II		IGR	opensea	IGR-opensea			TRUE		rs1369038
cg04786391	0.115779	0.792566	3.20124	0.00584645	0.214321	-2.93746	0.828747	0.712968	-0.115779	11	123295670	F	II		IGR	opensea	IGR-opensea			TRUE
cg12231246	0.115147	0.315373	3.20096	0.00584979	0.214331	-2.93802	0.351356	0.236209	-0.115147	17	27346732	F	II		IGR	shore	IGR-shore	chr17:27346853-27347222		TRUE		rs7503063
cg07147573	0.10539	0.86096	3.20034	0.00585731	0.214441	-2.93927	0.893895	0.788505	-0.10539	3	42918806	R	II	CYP8B1	TSS1500	shelf	TSS1500-shelf	chr3:42922219-42922872
cg13485718	0.127616	0.481397	3.20027	0.00585814	0.214441	-2.93941	0.521277	0.393661	-0.127616	14	93315488	F	II		IGR	opensea	IGR-opensea
cg07575519	0.117497	0.644582	3.19918	0.00587136	0.214443	-2.94162	0.6813	0.563803	-0.117497	5	16743265	F	II	MYO10	Body	opensea	Body-opensea			TRUE
cg13620317	-0.104299	0.677199	-3.19822	0.00588297	0.214455	-2.94355	0.644606	0.748905	0.104299	19	37894346	F	II		IGR	island	IGR-island	chr19:37894343-37894865				rs79960839
cg23948993	-0.102505	0.222936	-3.19808	0.00588462	0.214455	-2.94383	0.190903	0.293408	0.102505	X	9983205	R	I	WWC3	TSS1500	island	TSS1500-island	chrX:9982513-9984583					rs7066839
cg09110922	0.121564	0.625123	3.19783	0.00588765	0.214542	-2.94433	0.663112	0.541548	-0.121564	20	19866746	F	II		IGR	opensea	IGR-opensea				low-CpG:19814697-19815211
cg18764771	0.124949	0.563956	3.1975	0.00589161	0.214556	-2.94499	0.603002	0.478054	-0.124949	6	116381957	R	II	FRK	TSS200	opensea	TSS200-opensea			TRUE
cg05005343	0.12015	0.524054	3.19743	0.00589257	0.214556	-2.94515	0.561601	0.441451	-0.12015	11	121970285	R	II	LOC399959	Body	opensea	Body-opensea			TRUE
cg17403397	-0.116771	0.418446	-3.19738	0.0058931	0.214556	-2.94523	0.381955	0.498725	0.116771	2	145282262	F	II		IGR	island	IGR-island	chr2:145281736-145282269
cg12709009	0.118571	0.765981	3.19736	0.00589342	0.214556	-2.94529	0.803034	0.684463	-0.118571	6	170557582	R	II		IGR	opensea	IGR-opensea
cg08508431	-0.132606	0.41483	-3.19677	0.00590058	0.214591	-2.94647	0.37339	0.505996	0.132606	17	13319838	R	II		IGR	opensea	IGR-opensea			TRUE
cg09249588	0.10229	0.672424	3.19662	0.00590234	0.214591	-2.94677	0.704389	0.602099	-0.10229	12	58986386	R	II		IGR	opensea	IGR-opensea			TRUE
cg19497082	0.151286	0.527812	3.19628	0.00590656	0.214673	-2.94746	0.575089	0.423802	-0.151286	2	59185274	R	II		IGR	opensea	IGR-opensea			TRUE
cg10951117	0.124512	0.685966	3.19595	0.00591052	0.214701	-2.94812	0.724876	0.600364	-0.124512	8	50653939	F	I		IGR	opensea	IGR-opensea					rs12156084
cg06935361	-0.112703	0.724234	-3.19594	0.00591065	0.214701	-2.94814	0.689015	0.801718	0.112703	13	32964454	R	II	BRCA2	Body	opensea	Body-opensea			TRUE
cg17124478	0.110016	0.888139	3.1955	0.00591607	0.214741	-2.94904	0.922519	0.812503	-0.110016	6	14284182	F	I		IGR	opensea	IGR-opensea			TRUE		rs13220268
cg13197283	0.11641	0.667618	3.1954	0.00591718	0.214762	-2.94922	0.703996	0.587586	-0.11641	7	152433782	R	I		IGR	opensea	IGR-opensea
cg10866060	0.130475	0.569322	3.19536	0.0059177	0.214763	-2.94931	0.610095	0.47962	-0.130475	12	83592588	R	II		IGR	opensea	IGR-opensea			TRUE
cg16637690	0.105235	0.757921	3.19462	0.00592678	0.214897	-2.95081	0.790807	0.685571	-0.105235	16	69867478	R	II	WWP2	Body	opensea	Body-opensea			TRUE
cg12180551	0.119914	0.635975	3.19434	0.00593019	0.214897	-2.95137	0.673449	0.553534	-0.119914	1	56975583	F	II	PPAP2B	Body	opensea	Body-opensea			TRUE
cg19897113	0.118092	0.626566	3.19414	0.00593266	0.214897	-2.95178	0.66347	0.545377	-0.118092	1	26083702	F	I	MAN1C1	Body	opensea	Body-opensea			TRUE
cg27357306	-0.118925	0.480025	-3.19375	0.0059374	0.214897	-2.95256	0.442861	0.561786	0.118925	10	63657059	F	II		IGR	opensea	IGR-opensea		TRUE
cg09287864	-0.134252	0.413383	-3.19374	0.00593756	0.214897	-2.95258	0.371429	0.505682	0.134252	7	17274056	F	II		IGR	opensea	IGR-opensea			TRUE
cg12082015	0.104196	0.512817	3.19348	0.00594069	0.214897	-2.9531	0.545378	0.441183	-0.104196	2	147789639	F	II		IGR	opensea	IGR-opensea			TRUE
cg23501964	0.132495	0.623262	3.19325	0.00594355	0.214897	-2.95357	0.664666	0.532172	-0.132495	20	19866810	F	II		IGR	opensea	IGR-opensea				low-CpG:19814697-19815211
cg12579212	-0.124551	0.0743248	-3.19276	0.00594947	0.214897	-2.95454	0.0354025	0.159954	0.124551	3	46448868	R	II	CCRL2	5'UTR	opensea	5'UTR-opensea			TRUE
cg00459816	0.10952	0.64178	3.19256	0.00595199	0.214897	-2.95496	0.676005	0.566485	-0.10952	17	37862113	R	II	ERBB2	5'UTR	opensea	5'UTR-opensea		TRUE	TRUE		rs4252604
cg22286382	-0.114479	0.651084	-3.19237	0.00595427	0.214897	-2.95533	0.61531	0.729789	0.114479	6	25875233	R	II	SLC17A3	TSS1500	opensea	TSS1500-opensea
cg22911687	0.125923	0.643868	3.19236	0.00595442	0.214897	-2.95536	0.683219	0.557296	-0.125923	5	102211822	R	II	PAM	Body	opensea	Body-opensea			TRUE
cg12609829	-0.123666	0.53523	-3.19228	0.00595539	0.214897	-2.95552	0.496584	0.62025	0.123666	15	38988755	R	II	C15orf53	TSS200	opensea	TSS200-opensea
cg17840047	0.117898	0.607037	3.19201	0.00595876	0.214897	-2.95607	0.64388	0.525982	-0.117898	4	18580125	F	II		IGR	opensea	IGR-opensea			TRUE
cg06377684	0.100956	0.769625	3.19179	0.00596138	0.214897	-2.9565	0.801174	0.700218	-0.100956	1	10700647	F	II	CASZ1	Body	shore	Body-shore	chr1:10702136-10702340		TRUE
cg09743950	0.10099	0.534524	3.19136	0.00596675	0.215004	-2.95738	0.566083	0.465093	-0.10099	16	31341875	R	II	ITGAM	Body	shore	Body-shore	chr16:31342452-31343140		TRUE
cg09247692	0.154833	0.667625	3.19116	0.00596917	0.215006	-2.95778	0.71601	0.561177	-0.154833	22	38506781	R	I	BAIAP2L2	TSS200	opensea	TSS200-opensea		TRUE
cg17901924	0.145472	0.547221	3.19076	0.00597407	0.215015	-2.95858	0.592681	0.447209	-0.145472	1	233124418	R	II	PCNXL2	Body	shelf	Body-shelf	chr1:233121927-233122136	TRUE	TRUE
cg11504264	0.113123	0.72607	3.19076	0.00597409	0.215015	-2.95858	0.76142	0.648298	-0.113123	10	87284811	R	II		IGR	opensea	IGR-opensea			TRUE
cg07725983	0.103979	0.608603	3.19017	0.00598137	0.215052	-2.95977	0.641096	0.537117	-0.103979	5	123917964	F	II		IGR	opensea	IGR-opensea			TRUE
cg23247845	0.113131	0.836094	3.19004	0.00598298	0.215091	-2.96004	0.871448	0.758317	-0.113131	10	3679085	R	II		IGR	opensea	IGR-opensea
cg03475293	0.112091	0.580603	3.18977	0.00598632	0.215175	-2.96058	0.615631	0.50354	-0.112091	6	7051303	R	I		IGR	shore	IGR-shore	chr6:7051496-7052932	TRUE
cg22233512	0.128061	0.640428	3.18863	0.00600042	0.215236	-2.96288	0.680447	0.552386	-0.128061	17	55543388	R	II	MSI2	Body	opensea	Body-opensea			TRUE
cg18843856	0.104868	0.60276	3.18823	0.00600532	0.215236	-2.96368	0.635532	0.530663	-0.104868	2	121651050	R	II	GLI2	Body	opensea	Body-opensea			TRUE
cg10541663	0.142306	0.590358	3.18821	0.0060055	0.215236	-2.96371	0.634828	0.492522	-0.142306	3	177528511	F	II		IGR	opensea	IGR-opensea			TRUE		rs77332643
cg01131038	-0.111262	0.199955	-3.18818	0.00600593	0.215236	-2.96378	0.165186	0.276448	0.111262	8	10592118	F	I		IGR	shore	IGR-shore	chr8:10587304-10591109
cg01426713	0.107695	0.408428	3.18811	0.00600683	0.215236	-2.96393	0.442082	0.334387	-0.107695	6	106517533	F	II		IGR	opensea	IGR-opensea			TRUE
cg11460364	0.127753	0.67113	3.18807	0.00600724	0.215236	-2.96399	0.711053	0.5833	-0.127753	2	162931397	F	II	DPP4	TSS1500	shore	TSS1500-shore	chr2:162930233-162930879	TRUE	TRUE
cg22301128	0.106335	0.197586	3.18784	0.00601014	0.215236	-2.96446	0.230816	0.124481	-0.106335	4	77011716	F	II	ART3	Body	opensea	Body-opensea		TRUE	TRUE
cg03661054	0.104307	0.831075	3.18778	0.00601091	0.215236	-2.96459	0.863671	0.759364	-0.104307	2	3281330	R	II	TSSC1	Body	opensea	Body-opensea			TRUE
cg08520743	-0.122714	0.125757	-3.1877	0.00601189	0.215236	-2.96475	0.0874091	0.210123	0.122714	7	95025829	F	I	PON3	TSS200	island	TSS200-island	chr7:95025559-95026122
cg21893387	0.11129	0.871616	3.1875	0.00601438	0.215236	-2.96515	0.906394	0.795104	-0.11129	7	4064901	R	II	SDK1	Body	opensea	Body-opensea			TRUE
cg18914000	0.104512	0.450606	3.18625	0.00602983	0.215236	-2.96766	0.483266	0.378754	-0.104512	17	53847734	R	II	PCTP	Body	opensea	Body-opensea		TRUE				rs60315272
cg09561125	-0.106402	0.376187	-3.18521	0.00604281	0.215292	-2.96976	0.342936	0.449338	0.106402	7	108097477	F	II	NRCAM	TSS1500	shore	TSS1500-shore	chr7:108095401-108097206				rs3763463
cg10280007	0.114233	0.680915	3.18494	0.00604612	0.215295	-2.9703	0.716612	0.60238	-0.114233	10	123313831	R	II	FGFR2	Body	opensea	Body-opensea			TRUE
cg19368016	-0.131636	0.253063	-3.18472	0.00604888	0.215295	-2.97075	0.211927	0.343562	0.131636	10	11187764	F	II	CUGBP2	Body	opensea	Body-opensea			TRUE
cg03177847	0.111812	0.716295	3.18463	0.00605004	0.215295	-2.97093	0.751236	0.639424	-0.111812	6	76044678	F	II	FILIP1	Body	opensea	Body-opensea			TRUE
cg24850334	0.122041	0.522074	3.18434	0.00605367	0.215332	-2.97152	0.560212	0.438171	-0.122041	1	218879437	R	II		IGR	opensea	IGR-opensea		TRUE	TRUE
cg13132497	-0.144566	0.726084	-3.18309	0.0060692	0.215485	-2.97402	0.680907	0.825473	0.144566	15	100469152	R	II		IGR	shelf	IGR-shelf	chr15:100466480-100466691
cg05721476	-0.109123	0.582812	-3.18211	0.00608157	0.215632	-2.97601	0.548712	0.657834	0.109123	10	46076550	F	II	2025-03-08	5'UTR	opensea	5'UTR-opensea			TRUE
cg07470639	0.118237	0.466851	3.18191	0.00608404	0.215654	-2.97641	0.5038	0.385563	-0.118237	17	20839291	R	II		IGR	opensea	IGR-opensea			TRUE
cg25757140	-0.116697	0.62542	-3.18175	0.00608603	0.215654	-2.97673	0.588952	0.705649	0.116697	19	38039469	F	II		IGR	shore	IGR-shore	chr19:38039561-38040395
cg05404698	-0.140733	0.190779	-3.18125	0.00609226	0.215654	-2.97773	0.1468	0.287533	0.140733	6	28956247	R	I		IGR	island	IGR-island	chr6:28956106-28956578
cg04388970	0.110338	0.84073	3.18036	0.00610352	0.215742	-2.97954	0.875211	0.764872	-0.110338	7	32541235	F	II	AVL9	Body	opensea	Body-opensea			TRUE
cg24868122	0.125033	0.776871	3.18001	0.00610788	0.215838	-2.98023	0.815944	0.690911	-0.125033	5	142553056	F	II	ARHGAP26	Body	opensea	Body-opensea			TRUE		rs853163
cg27284288	-0.104013	0.685906	-3.17983	0.00611022	0.215846	-2.98061	0.653402	0.757415	0.104013	11	60739005	R	II	CD6	TSS200	opensea	TSS200-opensea
cg17516809	0.137769	0.771599	3.17945	0.00611495	0.215905	-2.98137	0.814652	0.676883	-0.137769	12	127547994	F	II		IGR	opensea	IGR-opensea
cg19633390	0.128808	0.55692	3.17933	0.00611645	0.215905	-2.9816	0.597173	0.468364	-0.128808	13	110381307	F	II		IGR	opensea	IGR-opensea			TRUE
cg12960696	0.103164	0.425419	3.1787	0.00612435	0.216021	-2.98287	0.457658	0.354494	-0.103164	5	148404114	R	II	SH3TC2	Body	opensea	Body-opensea		TRUE	TRUE
cg14996985	-0.120099	0.570534	-3.1786	0.00612564	0.21603	-2.98307	0.533003	0.653102	0.120099	5	92456475	R	II		IGR	opensea	IGR-opensea			TRUE
cg19901940	-0.122832	0.490607	-3.17814	0.00613143	0.216049	-2.984	0.452222	0.575055	0.122832	14	22689870	R	II		IGR	opensea	IGR-opensea
cg16522250	0.113624	0.669671	3.17791	0.0061344	0.216049	-2.98447	0.705179	0.591555	-0.113624	3	1382597	F	II	CNTN6	Body	opensea	Body-opensea			TRUE		rs72427674
cg04815371	0.102524	0.812531	3.17776	0.00613628	0.216049	-2.98477	0.84457	0.742045	-0.102524	14	33279138	F	II	AKAP6	Body	opensea	Body-opensea			TRUE
cg17826834	-0.151393	0.235512	-3.17773	0.00613666	0.216049	-2.98483	0.188202	0.339595	0.151393	15	96868857	R	II	NR2F2	TSS1500	shelf	TSS1500-shelf	chr15:96864881-96866787		TRUE
cg00937742	0.112496	0.341758	3.17773	0.00613671	0.216049	-2.98484	0.376913	0.264417	-0.112496	2	133429299	F	II	LYPD1	TSS1500	shore	TSS1500-shore	chr2:133426652-133428870
cg07185041	0.109539	0.826547	3.17733	0.00614166	0.21607	-2.98562	0.860778	0.751239	-0.109539	6	31845721	R	II	SLC44A4	Body	opensea	Body-opensea			TRUE
cg19753607	0.10624	0.87835	3.17692	0.00614696	0.216143	-2.98647	0.91155	0.80531	-0.10624	5	95231593	F	II	ELL2	Body	opensea	Body-opensea			TRUE
cg23830540	0.135433	0.414029	3.17666	0.00615024	0.216154	-2.98699	0.456352	0.320919	-0.135433	4	5845864	F	II	CRMP1	Body	opensea	Body-opensea			TRUE
cg18782491	0.11818	0.772271	3.17582	0.00616082	0.216157	-2.98867	0.809203	0.691022	-0.11818	7	86454826	R	II	GRM3	Body	opensea	Body-opensea			TRUE
cg26093687	0.104178	0.830543	3.17573	0.00616204	0.216172	-2.98886	0.863099	0.75892	-0.104178	1	32686870	R	II	EIF3I	TSS1500	shore	TSS1500-shore	chr1:32687521-32688040
cg11435506	-0.133498	0.167973	-3.17513	0.00616958	0.216256	-2.99006	0.126255	0.259753	0.133498	7	95026073	R	I	PON3	TSS1500	island	TSS1500-island	chr7:95025559-95026122
cg26986871	-0.128761	0.560089	-3.17457	0.00617676	0.216329	-2.99119	0.519851	0.648612	0.128761	12	10545083	R	II		IGR	opensea	IGR-opensea
cg13917151	-0.110459	0.232632	-3.17425	0.00618085	0.216377	-2.99184	0.198113	0.308572	0.110459	1	27730185	R	II		IGR	opensea	IGR-opensea		TRUE
cg06033721	0.10722	0.600421	3.17412	0.00618247	0.216377	-2.9921	0.633927	0.526707	-0.10722	1	95339232	R	II	SLC44A3	Body	opensea	Body-opensea			TRUE
cg08116775	-0.111583	0.374304	-3.17397	0.00618439	0.216377	-2.9924	0.339434	0.451017	0.111583	8	135726595	F	II	ZFAT	TSS1500	shore	TSS1500-shore	chr8:135724770-135725552
cg16341979	0.109843	0.539017	3.17374	0.00618731	0.216396	-2.99286	0.573343	0.4635	-0.109843	14	94576977	F	II	IFI27	TSS200	opensea	TSS200-opensea		TRUE
cg03942871	0.135002	0.574503	3.17337	0.00619204	0.216403	-2.99361	0.616692	0.481689	-0.135002	7	102574105	F	II	LRRC17	5'UTR	opensea	5'UTR-opensea			TRUE
cg00994629	-0.123087	0.57295	-3.17277	0.00619967	0.216403	-2.99481	0.534485	0.657572	0.123087	14	22694547	F	II		IGR	opensea	IGR-opensea			TRUE
cg14527250	0.10074	0.415807	3.17274	0.0062001	0.216403	-2.99488	0.447288	0.346548	-0.10074	12	1753866	F	II	WNT5B	Body	shore	Body-shore	chr12:1754997-1755243	TRUE	TRUE
cg10158280	0.1185	0.671519	3.17235	0.00620509	0.216478	-2.99567	0.708551	0.59005	-0.1185	17	30954650	R	II	MYO1D	Body	opensea	Body-opensea			TRUE
cg12092005	0.112899	0.743392	3.17198	0.0062098	0.216478	-2.99641	0.778672	0.665773	-0.112899	14	99532847	F	II		IGR	opensea	IGR-opensea
cg02426072	0.12806	0.7362	3.17195	0.00621011	0.216478	-2.99645	0.776219	0.648159	-0.12806	6	170474284	F	II		IGR	shore	IGR-shore	chr6:170474406-170475553
cg00306893	0.11428	0.609727	3.17037	0.00623045	0.216478	-2.99965	0.645439	0.531159	-0.11428	3	168726716	R	II		IGR	opensea	IGR-opensea			TRUE
cg10627839	-0.10943	0.378123	-3.17006	0.00623437	0.216478	-3.00026	0.343926	0.453356	0.10943	1	196866512	R	I	CFHR4	Body	opensea	Body-opensea			TRUE
cg04569429	-0.138678	0.203985	-3.17005	0.00623446	0.216478	-3.00028	0.160648	0.299326	0.138678	17	37024625	F	II	LASP1	TSS1500	shore	TSS1500-shore	chr17:37025737-37027104
cg11155432	0.116056	0.399443	3.1699	0.0062365	0.216478	-3.0006	0.43571	0.319655	-0.116056	5	27038802	R	II	CDH9	TSS200	opensea	TSS200-opensea
cg05227215	0.103201	0.557033	3.16966	0.00623954	0.216478	-3.00107	0.589283	0.486082	-0.103201	5	139057496	R	I	CXXC5	5'UTR	shore	5'UTR-shore	chr5:139056577-139056856		TRUE
cg16205958	0.117203	0.525007	3.16901	0.00624783	0.216478	-3.00237	0.561633	0.44443	-0.117203	5	124653247	F	II		IGR	opensea	IGR-opensea			TRUE
cg14962327	0.10673	0.702011	3.16893	0.00624896	0.216478	-3.00255	0.735364	0.628634	-0.10673	22	25615334	F	I	CRYBB2	TSS1500	opensea	TSS1500-opensea						rs73879217
cg14595786	-0.1382	0.557355	-3.16783	0.00626305	0.216522	-3.00475	0.514168	0.652367	0.1382	19	51626986	R	II	SIGLEC9	TSS1500	opensea	TSS1500-opensea
cg08675521	0.104146	0.683765	3.16677	0.00627674	0.216691	-3.00688	0.716311	0.612165	-0.104146	11	18716666	F	II		IGR	shelf	IGR-shelf	chr11:18720271-18720821
cg19045293	-0.126294	0.196896	-3.16659	0.00627911	0.216693	-3.00725	0.157429	0.283723	0.126294	X	39864984	F	I		IGR	island	IGR-island	chrX:39864525-39869106	TRUE
cg24147343	0.104215	0.265611	3.16656	0.00627947	0.216693	-3.00731	0.298178	0.193963	-0.104215	5	174221117	R	II		IGR	opensea	IGR-opensea		TRUE
cg20765716	-0.109763	0.692726	-3.16628	0.00628318	0.216736	-3.00788	0.658425	0.768188	0.109763	17	3704602	F	I	ITGAE	TSS200	opensea	TSS200-opensea
cg07294814	0.121146	0.670032	3.16557	0.00629235	0.216796	-3.00931	0.70789	0.586744	-0.121146	8	144348648	F	II	GLI4	TSS1500	shore	TSS1500-shore	chr8:144349048-144350070				rs79565437
cg06150803	0.102816	0.231528	3.16495	0.00630031	0.216857	-3.01054	0.263658	0.160843	-0.102816	13	24144257	F	II	TNFRSF19	TSS1500	opensea	TSS1500-opensea					rs9510777
cg01826138	0.111066	0.836649	3.16489	0.00630117	0.216857	-3.01068	0.871357	0.760292	-0.111066	2	181843183	R	II		IGR	shore	IGR-shore	chr2:181844791-181845514
cg23811057	-0.116524	0.173882	-3.16482	0.00630199	0.216857	-3.0108	0.137468	0.253992	0.116524	1	234908514	R	II		IGR	opensea	IGR-opensea		TRUE
cg14185860	0.111722	0.577195	3.16448	0.00630648	0.216859	-3.0115	0.612108	0.500386	-0.111722	2	56675941	F	II		IGR	opensea	IGR-opensea			TRUE
cg14275880	0.14156	0.688055	3.16429	0.00630892	0.216859	-3.01188	0.732293	0.590733	-0.14156	9	91268133	R	II	LOC286238	TSS1500	opensea	TSS1500-opensea
cg21439481	0.10704	0.597103	3.16341	0.00632042	0.217008	-3.01366	0.630553	0.523513	-0.10704	8	143201145	F	II		IGR	shore	IGR-shore	chr8:143202654-143202868
cg02541444	0.123905	0.476829	3.16277	0.00632876	0.21711	-3.01494	0.515549	0.391644	-0.123905	2	37996000	F	II		IGR	opensea	IGR-opensea		TRUE	TRUE		rs72884175	rs72799821
cg00599530	0.126822	0.45475	3.16274	0.00632912	0.21711	-3.015	0.494382	0.36756	-0.126822	6	170589809	F	II		IGR	island	IGR-island	chr6:170589411-170590085	TRUE			rs9348263	rs17860698
cg09430647	0.124254	0.495587	3.16187	0.00634039	0.217193	-3.01674	0.534416	0.410162	-0.124254	10	106247914	R	II		IGR	opensea	IGR-opensea			TRUE
cg13375690	-0.116698	0.780206	-3.16185	0.00634068	0.217193	-3.01678	0.743738	0.860436	0.116698	8	66706202	R	II	PDE7A	Body	opensea	Body-opensea			TRUE
cg05651243	0.108598	0.357064	3.16168	0.00634289	0.217193	-3.01712	0.391001	0.282403	-0.108598	11	134527018	R	I		IGR	opensea	IGR-opensea
cg18642369	-0.117586	0.378457	-3.16159	0.00634415	0.217209	-3.01732	0.341711	0.459297	0.117586	13	99651231	F	II	DOCK9	Body	opensea	Body-opensea			TRUE
cg17786845	0.118665	0.742066	3.1615	0.00634525	0.217216	-3.01749	0.779149	0.660484	-0.118665	3	134529302	R	II	EPHB1	Body	opensea	Body-opensea			TRUE
cg22628512	0.100097	0.597453	3.16113	0.00635015	0.217265	-3.01824	0.628734	0.528637	-0.100097	1	200348658	R	II		IGR	opensea	IGR-opensea		TRUE	TRUE
cg19764348	0.135618	0.685164	3.16034	0.00636044	0.217352	-3.01982	0.727545	0.591927	-0.135618	12	63352052	F	II		IGR	opensea	IGR-opensea			TRUE
cg10884539	-0.125166	0.526358	-3.1595	0.00637152	0.217508	-3.02152	0.487244	0.61241	0.125166	6	2752360	F	II	MYLK4	TSS1500	opensea	TSS1500-opensea
cg22707705	0.133924	0.619916	3.15862	0.00638309	0.217592	-3.02329	0.661767	0.527843	-0.133924	2	219646114	R	II	CYP27A1	TSS1500	shore	TSS1500-shore	chr2:219646432-219647181	TRUE
cg09002726	0.118109	0.709598	3.15817	0.00638891	0.217635	-3.02418	0.746507	0.628398	-0.118109	11	102745934	R	II	MMP12	TSS200	opensea	TSS200-opensea
cg22018083	-0.118034	0.42089	-3.15753	0.00639742	0.217731	-3.02548	0.384004	0.502038	0.118034	19	50861789	R	II	NAPSA	3'UTR	island	3'UTR-island	chr19:50861773-50862083	TRUE
cg22495322	0.104338	0.800832	3.15545	0.00642485	0.218073	-3.02966	0.833438	0.7291	-0.104338	5	59619821	R	II	PDE4D	5'UTR	opensea	5'UTR-opensea			TRUE
cg21497139	0.114747	0.86401	3.15261	0.00646248	0.21835	-3.03536	0.899869	0.785122	-0.114747	3	16852000	F	II		IGR	opensea	IGR-opensea			TRUE
cg04887066	0.116093	0.762169	3.15223	0.00646755	0.218439	-3.03613	0.798448	0.682354	-0.116093	12	32185731	F	II		IGR	opensea	IGR-opensea			TRUE
cg22821289	0.126349	0.632792	3.1506	0.00648933	0.218645	-3.03941	0.672276	0.545928	-0.126349	11	115581830	F	I		IGR	opensea	IGR-opensea					rs80165656
cg21398469	0.111535	0.545742	3.15013	0.00649564	0.218654	-3.04036	0.580597	0.469062	-0.111535	4	78077358	R	II	CCNG2	TSS1500	shore	TSS1500-shore	chr4:78077995-78079591
cg08875705	-0.160624	0.235549	-3.14889	0.00651222	0.218929	-3.04285	0.185354	0.345978	0.160624	12	6665330	R	I	IFFO1	TSS200	island	TSS200-island	chr12:6664425-6665336				rs11064253
cg13576330	-0.101593	0.534537	-3.14874	0.00651418	0.218941	-3.04314	0.502789	0.604382	0.101593	5	92943267	R	II		IGR	shelf	IGR-shelf	chr5:92939795-92940216	TRUE	TRUE
cg13672871	0.103167	0.400173	3.14843	0.00651837	0.218941	-3.04377	0.432413	0.329245	-0.103167	13	27317381	R	II		IGR	opensea	IGR-opensea			TRUE
cg15989810	0.100957	0.461319	3.14824	0.00652086	0.218957	-3.04414	0.492868	0.391911	-0.100957	12	131617481	F	II	GPR133	Body	opensea	Body-opensea		TRUE
cg01796223	0.111116	0.613873	3.14784	0.00652626	0.219016	-3.04495	0.648597	0.537481	-0.111116	7	129933014	R	II	CPA4	1stExon	opensea	1stExon-opensea		TRUE	TRUE
cg01165683	0.13515	0.52721	3.14756	0.00653005	0.219072	-3.04552	0.569444	0.434294	-0.13515	3	24430957	F	II	THRB	5'UTR	opensea	5'UTR-opensea			TRUE
cg00694520	0.10265	0.574661	3.14737	0.00653259	0.219079	-3.0459	0.606739	0.504089	-0.10265	2	223916687	F	II	KCNE4	TSS200	shore	TSS200-shore	chr2:223917576-223918037		TRUE
cg06430772	0.112987	0.618663	3.14723	0.00653447	0.219079	-3.04618	0.653972	0.540985	-0.112987	2	236443508	R	II	AGAP1	Body	shore	Body-shore	chr2:236443815-236444025		TRUE
cg12937159	-0.111005	0.597148	-3.14687	0.00653932	0.219125	-3.0469	0.562459	0.673464	0.111005	2	113298655	R	II	POLR1B	TSS1500	shore	TSS1500-shore	chr2:113299403-113300284
cg23526194	0.103272	0.886421	3.1466	0.00654291	0.219125	-3.04744	0.918693	0.815421	-0.103272	14	56023591	R	II		IGR	opensea	IGR-opensea			TRUE
cg26875384	0.106714	0.54001	3.14602	0.00655075	0.219173	-3.04861	0.573358	0.466643	-0.106714	10	14817904	F	II	FAM107B	TSS1500	opensea	TSS1500-opensea
cg14023389	0.1218	0.781589	3.14589	0.00655257	0.21919	-3.04888	0.819651	0.697851	-0.1218	9	138136386	R	II		IGR	shore	IGR-shore	chr9:138136050-138136294
cg14768087	0.117308	0.647764	3.14519	0.00656201	0.219272	-3.05028	0.684423	0.567115	-0.117308	3	188888497	F	II	TPRG1	TSS1500	opensea	TSS1500-opensea
cg16393928	0.102131	0.586995	3.14507	0.00656359	0.219272	-3.05052	0.618911	0.51678	-0.102131	1	3135836	R	II	PRDM16	Body	opensea	Body-opensea		TRUE	TRUE
cg11321190	0.115311	0.333793	3.14443	0.00657233	0.219405	-3.05182	0.369828	0.254517	-0.115311	3	37239890	F	II		IGR	opensea	IGR-opensea			TRUE
cg12433575	0.115146	0.613156	3.1437	0.00658214	0.219553	-3.05327	0.649139	0.533993	-0.115146	6	30881464	R	II	VARS2	TSS1500	shore	TSS1500-shore	chr6:30881533-30882296
cg22354618	0.174718	0.739736	3.14316	0.00658952	0.219597	-3.05437	0.794335	0.619618	-0.174718	18	8800458	F	II	KIAA0802	Body	opensea	Body-opensea		TRUE
cg21045828	0.103136	0.727594	3.14272	0.00659543	0.219598	-3.05524	0.759824	0.656688	-0.103136	8	89310065	F	II	MMP16	Body	opensea	Body-opensea			TRUE
cg18693141	0.116848	0.831733	3.14249	0.00659864	0.219598	-3.05572	0.868248	0.7514	-0.116848	12	125242977	F	II		IGR	opensea	IGR-opensea					rs701102
cg25734161	0.117916	0.74824	3.14217	0.00660286	0.219607	-3.05634	0.785089	0.667172	-0.117916	11	134137345	R	II		IGR	opensea	IGR-opensea			TRUE
cg00523161	-0.117742	0.435986	-3.14184	0.00660745	0.219628	-3.05702	0.399192	0.516934	0.117742	2	11888753	R	I	LPIN1	5'UTR	shore	5'UTR-shore	chr2:11886249-11887207		TRUE
cg22988651	0.103368	0.892539	3.14123	0.00661574	0.21971	-3.05824	0.924841	0.821473	-0.103368	3	15792635	R	II	ANKRD28	Body	opensea	Body-opensea			TRUE
cg14655843	-0.103096	0.58944	-3.14045	0.00662638	0.21971	-3.05981	0.557222	0.660318	0.103096	9	114688737	F	II	UGCG	Body	opensea	Body-opensea			TRUE
cg12571423	-0.106095	0.238276	-3.13966	0.00663709	0.21971	-3.06139	0.205122	0.311217	0.106095	13	37006748	F	II	CCNA1	5'UTR	shore	5'UTR-shore	chr13:37005581-37006453	TRUE
cg27537972	0.106287	0.485323	3.13922	0.00664311	0.21971	-3.06227	0.518537	0.412251	-0.106287	12	98738197	R	II		IGR	opensea	IGR-opensea			TRUE
cg11419262	0.121001	0.635175	3.13903	0.0066458	0.21973	-3.06267	0.672988	0.551987	-0.121001	3	193840181	F	II		IGR	opensea	IGR-opensea			TRUE		rs7618027
cg01357846	0.137901	0.549403	3.13874	0.00664975	0.219782	-3.06325	0.592497	0.454596	-0.137901	2	79252794	R	II	REG3G	TSS200	opensea	TSS200-opensea
cg14564351	-0.10227	0.731584	-3.1385	0.00665294	0.219782	-3.06372	0.699624	0.801895	0.10227	6	135644405	R	II	AHI1	Body	opensea	Body-opensea			TRUE
cg16253976	0.111534	0.675907	3.13824	0.00665652	0.219796	-3.06424	0.710761	0.599227	-0.111534	5	7686199	F	II	ADCY2	Body	opensea	Body-opensea			TRUE
cg15635633	0.112452	0.580593	3.13741	0.00666793	0.219796	-3.06591	0.615734	0.503282	-0.112452	2	161850423	F	II		IGR	opensea	IGR-opensea			TRUE
cg21177396	0.188403	0.447533	3.13676	0.00667689	0.219846	-3.06722	0.506409	0.318005	-0.188403	9	126888124	R	II		IGR	opensea	IGR-opensea			TRUE
cg20457051	0.12747	0.588552	3.13611	0.00668575	0.219846	-3.06852	0.628386	0.500917	-0.12747	6	47668044	R	II	GPR115	5'UTR	opensea	5'UTR-opensea			TRUE
cg19901403	0.106336	0.54288	3.13595	0.00668801	0.219846	-3.06885	0.57611	0.469774	-0.106336	8	74332522	R	II		IGR	opensea	IGR-opensea		TRUE	TRUE
cg04543516	0.100008	0.79329	3.13557	0.00669321	0.219866	-3.0696	0.824542	0.724534	-0.100008	20	21589093	F	I		IGR	opensea	IGR-opensea
cg02618319	0.102818	0.737615	3.13525	0.00669763	0.219874	-3.07025	0.769746	0.666928	-0.102818	11	119247012	R	I	USP2	5'UTR	opensea	5'UTR-opensea			TRUE	low-CpG:118752221-118752223
cg25506726	-0.109164	0.12645	-3.13511	0.00669952	0.219885	-3.07052	0.092336	0.2015	0.109164	15	79383770	R	I	RASGRF1	TSS1500	island	TSS1500-island	chr15:79381804-79384209					rs76115561
cg15454374	-0.10698	0.308391	-3.13404	0.00671441	0.220045	-3.07269	0.27496	0.38194	0.10698	6	31325455	R	I	HLA-B	TSS1500	shore	TSS1500-shore	chr6:31323946-31325211
cg01037523	0.155008	0.617905	3.13363	0.00672007	0.220045	-3.07351	0.666345	0.511337	-0.155008	3	187078716	F	II		IGR	opensea	IGR-opensea			TRUE
cg25144558	0.111015	0.558814	3.13257	0.00673472	0.220069	-3.07564	0.593506	0.482491	-0.111015	7	3632395	F	II	SDK1	Body	opensea	Body-opensea			TRUE
cg03090969	0.102331	0.497433	3.13176	0.00674596	0.220069	-3.07726	0.529412	0.427081	-0.102331	8	104117866	R	II		IGR	opensea	IGR-opensea		TRUE	TRUE
cg18740429	0.116512	0.638262	3.13175	0.00674609	0.220069	-3.07728	0.674672	0.55816	-0.116512	10	134844716	F	I		IGR	island	IGR-island	chr10:134844442-134844934
cg10441909	0.110724	0.537607	3.13124	0.00675313	0.220069	-3.0783	0.572208	0.461484	-0.110724	12	13712678	R	II		IGR	shelf	IGR-shelf	chr12:13715849-13717034
cg04546999	0.108254	0.781782	3.13099	0.00675658	0.220069	-3.0788	0.815611	0.707357	-0.108254	1	152956429	R	II	SPRR1A	TSS200	opensea	TSS200-opensea						rs1611755
cg10321723	0.1217	0.837512	3.13098	0.00675669	0.220069	-3.07881	0.875543	0.753843	-0.1217	1	145727762	R	II	PDZK1	5'UTR	opensea	5'UTR-opensea			TRUE
cg02269984	0.140068	0.609442	3.13001	0.00677026	0.220069	-3.08077	0.653213	0.513145	-0.140068	15	60429806	F	I		IGR	opensea	IGR-opensea			TRUE
cg00754552	-0.106417	0.665049	-3.12949	0.00677747	0.220069	-3.08181	0.631793	0.73821	0.106417	19	50848461	R	II	NAPSB	TSS1500	opensea	TSS1500-opensea
cg20150640	0.116607	0.607994	3.12923	0.00678106	0.220069	-3.08233	0.644434	0.527827	-0.116607	1	23697656	R	II	C1orf213	3'UTR	shore	3'UTR-shore	chr1:23694690-23696050		TRUE
cg12114200	0.135059	0.774569	3.12907	0.00678343	0.220069	-3.08267	0.816775	0.681715	-0.135059	13	112074876	R	I		IGR	opensea	IGR-opensea
cg08810464	0.111237	0.457003	3.12906	0.00678344	0.220069	-3.08267	0.491765	0.380528	-0.111237	13	34713954	R	II		IGR	opensea	IGR-opensea			TRUE
cg18881440	0.100851	0.791472	3.12897	0.00678474	0.220069	-3.08285	0.822987	0.722137	-0.100851	2	176470789	F	II		IGR	opensea	IGR-opensea			TRUE
cg00941836	0.13269	0.407947	3.12892	0.00678552	0.220069	-3.08297	0.449412	0.316723	-0.13269	22	27834549	F	I		IGR	island	IGR-island	chr22:27834425-27834630
cg20438460	0.107448	0.47838	3.12862	0.00678968	0.220069	-3.08357	0.511958	0.40451	-0.107448	2	146580994	F	II		IGR	opensea	IGR-opensea			TRUE
cg00338996	0.110604	0.611907	3.12834	0.00679354	0.220069	-3.08412	0.646471	0.535867	-0.110604	11	45828080	R	II	SLC35C1	Body	shore	Body-shore	chr11:45825615-45826872		TRUE
cg26336265	-0.105154	0.684216	-3.12794	0.00679911	0.220069	-3.08492	0.651356	0.75651	0.105154	6	25042955	R	II		IGR	opensea	IGR-opensea
cg06963182	-0.125218	0.439723	-3.12746	0.0068059	0.220069	-3.08589	0.400592	0.525811	0.125218	2	85122086	R	II		IGR	opensea	IGR-opensea			TRUE
cg08391321	-0.133869	0.166089	-3.12727	0.00680848	0.220069	-3.08626	0.124255	0.258123	0.133869	5	112630695	R	I	MCC	TSS200	shore	TSS200-shore	chr5:112630219-112630624			high-CpG:112658245-112658598
cg14239983	0.107069	0.401561	3.12637	0.0068211	0.220069	-3.08807	0.43502	0.327951	-0.107069	11	121337384	R	II	SORL1	Body	opensea	Body-opensea		TRUE	TRUE
cg18041960	0.109864	0.843041	3.12572	0.00683029	0.220069	-3.08938	0.877373	0.767509	-0.109864	11	123415568	R	II	GRAMD1B	Body	opensea	Body-opensea			TRUE
cg08362102	0.11046	0.256255	3.12506	0.00683961	0.220126	-3.09071	0.290773	0.180314	-0.11046	15	69087774	F	II	ANP32A	Body	opensea	Body-opensea		TRUE	TRUE
cg26360026	0.123094	0.478003	3.12446	0.00684803	0.220241	-3.09191	0.51647	0.393376	-0.123094	2	202814504	R	II		IGR	opensea	IGR-opensea			TRUE
cg25772365	0.118696	0.554881	3.12423	0.00685124	0.220251	-3.09237	0.591974	0.473278	-0.118696	6	140762224	F	II		IGR	opensea	IGR-opensea			TRUE		rs9495704
cg17982102	-0.109486	0.214375	-3.12398	0.00685479	0.220323	-3.09287	0.18016	0.289646	0.109486	18	9707896	R	II	RAB31	TSS1500	island	TSS1500-island	chr18:9707752-9709311	TRUE
cg24820672	0.134201	0.50048	3.12346	0.00686213	0.220378	-3.09392	0.542417	0.408216	-0.134201	13	112984728	F	I		IGR	shore	IGR-shore	chr13:112984966-112985733
cg22466678	0.118501	0.748488	3.12292	0.00686968	0.220399	-3.09499	0.785519	0.667018	-0.118501	12	89749033	F	I		IGR	shore	IGR-shore	chr12:89745168-89748144
cg10307052	0.125616	0.720818	3.12291	0.00686995	0.220399	-3.09503	0.760073	0.634457	-0.125616	17	21065542	F	II	DHRS7B	Body	opensea	Body-opensea			TRUE
cg08162465	-0.153827	0.58837	-3.12172	0.00688672	0.220556	-3.09741	0.540299	0.694126	0.153827	1	87668671	R	II		IGR	opensea	IGR-opensea
cg20754261	-0.150177	0.280345	-3.12077	0.0069002	0.22059	-3.09931	0.233415	0.383592	0.150177	2	468330	F	II		IGR	island	IGR-island	chr2:467849-468659		TRUE
cg20079298	0.116158	0.447446	3.12039	0.00690554	0.22064	-3.10007	0.483745	0.367587	-0.116158	15	40572326	F	I		IGR	island	IGR-island	chr15:40572078-40572758		TRUE
cg22666103	-0.104896	0.468506	-3.11999	0.00691124	0.220729	-3.10087	0.435726	0.540622	0.104896	10	111818288	R	II	ADD3	5'UTR	opensea	5'UTR-opensea			TRUE
cg07342618	0.117572	0.821994	3.11982	0.00691368	0.220759	-3.10122	0.858735	0.741163	-0.117572	10	3300407	F	I		IGR	opensea	IGR-opensea
cg13818451	0.101588	0.19031	3.11978	0.00691421	0.220759	-3.10129	0.222056	0.120468	-0.101588	14	103550796	R	I		IGR	island	IGR-island	chr14:103550445-103550919	TRUE	TRUE
cg07784166	0.125291	0.67677	3.11953	0.00691785	0.220799	-3.1018	0.715923	0.590632	-0.125291	5	74172353	R	I		IGR	opensea	IGR-opensea			TRUE
cg01133215	-0.106349	0.584194	-3.11929	0.00692119	0.220841	-3.10227	0.55096	0.657309	0.106349	6	45399681	F	II	RUNX2	Body	opensea	Body-opensea			TRUE
cg02383368	0.107367	0.673199	3.11913	0.00692354	0.220849	-3.10261	0.706751	0.599384	-0.107367	19	7684468	F	I	XAB2	3'UTR	shore	3'UTR-shore	chr19:7685152-7686182	TRUE			rs4134869
cg11452329	0.177833	0.658466	3.11847	0.00693288	0.220889	-3.10392	0.714039	0.536207	-0.177833	6	85824216	F	I		IGR	opensea	IGR-opensea
cg09948958	-0.122158	0.363386	-3.11837	0.00693432	0.220889	-3.10412	0.325211	0.447369	0.122158	14	94443055	R	II		IGR	opensea	IGR-opensea				low-CpG:93512658-93512840
cg00892742	0.1232	0.622132	3.11807	0.0069387	0.220893	-3.10474	0.660632	0.537432	-0.1232	3	195648562	F	I		IGR	opensea	IGR-opensea			TRUE
cg23937993	-0.138691	0.174399	-3.11806	0.00693884	0.220893	-3.10476	0.131058	0.269749	0.138691	11	10477847	F	II	AMPD3	1stExon	opensea	1stExon-opensea		TRUE	TRUE
cg23353000	0.102086	0.356049	3.11788	0.00694137	0.220926	-3.10511	0.387951	0.285865	-0.102086	17	42120896	R	II	LSM12	Body	opensea	Body-opensea			TRUE
cg05905731	0.112898	0.801195	3.11785	0.0069418	0.220926	-3.10517	0.836476	0.723578	-0.112898	16	85485785	F	II		IGR	opensea	IGR-opensea
cg04278110	-0.10908	0.417543	-3.11767	0.00694436	0.220974	-3.10553	0.383456	0.492536	0.10908	2	198063759	F	II	ANKRD44	TSS1500	opensea	TSS1500-opensea					rs34645720
cg07059925	0.116675	0.503365	3.11708	0.00695283	0.221093	-3.10672	0.539826	0.423151	-0.116675	11	108422936	R	II	EXPH5	TSS200	opensea	TSS200-opensea			TRUE
cg23171972	0.10954	0.575909	3.11691	0.00695524	0.2211	-3.10706	0.610141	0.500601	-0.10954	8	143203477	R	I		IGR	shore	IGR-shore	chr8:143202654-143202868
cg24301692	0.127971	0.807868	3.11685	0.00695605	0.2211	-3.10717	0.847859	0.719889	-0.127971	2	85696201	F	II		IGR	opensea	IGR-opensea			TRUE
cg17791799	0.117298	0.80766	3.11676	0.00695733	0.2211	-3.10735	0.844316	0.727018	-0.117298	4	16036123	F	II	PROM1	Body	opensea	Body-opensea			TRUE
cg14160093	0.108829	0.339677	3.11647	0.00696147	0.2211	-3.10793	0.373686	0.264857	-0.108829	6	112892805	F	II		IGR	opensea	IGR-opensea			TRUE
cg26581165	0.136751	0.705213	3.11646	0.00696165	0.2211	-3.10796	0.747948	0.611197	-0.136751	15	39135589	R	II		IGR	opensea	IGR-opensea			TRUE
[truncated: 417 more rows]
