# Supplementary material for: Comprehensive analysis of DNA methylation patterns in recurrent miscarriage: imprinted/non-imprinted genes and their regulation across sperm and fetal-maternal tissues
Source: PeerJ. 2025 Oct 7;13:e20125. doi: 10.7717/peerj.20125 (PMC12513379; doi:10.7717/peerj.20125)
Supplement: Supplemental Information 6 [file peerj-13-20125-s006.xlsx]

## Sheet: 补充TableS4.DMP.sperm
Table S5. The differentially methylated probes (DMPs) identified in sperm between recurrent miscarriage (RM) and artificial accidental termination of pregnancy (AA) groups.
probe	logFC	AveExpr	t	P.Value	adj.P.Val	B	AA_AVG	RM_AVG	deltaBeta	CHR	MAPINFO	Strand	Type	gene	feature	cgi	feat.cgi	UCSC_CpG_Islands_Name	DHS	Enhancer	Phantom	Probe_SNPs	Probe_SNPs_10
cg04076264	0.219079	0.474658	18.0821	3.74038e-06	0.603628	5.35341	0.365118	0.584197	0.219079	6	150437118	F	I		IGR	opensea	IGR-opensea
cg21873672	0.142064	0.263807	12.7153	2.54372e-05	0.90051	3.46437	0.192775	0.334839	0.142064	5	2668716	F	II		IGR	opensea	IGR-opensea
cg22753611	-0.242549	0.837742	-11.8362	3.74225e-05	0.90051	3.06195	0.959017	0.716467	-0.242549	6	17472892	F	II	CAP2	Body	opensea	Body-opensea			TRUE
cg22334632	0.102277	0.634855	11.4965	4.3758e-05	0.90051	2.89729	0.583716	0.685993	0.102277	19	47552711	R	II	TMEM160	TSS1500	shore	TSS1500-shore	chr19:47551387-47552137
cg07121807	0.10468	0.60814	11.119	5.23316e-05	0.90051	2.70785	0.5558	0.660481	0.10468	1	18152750	F	I	ACTL8	Body	island	Body-island	chr1:18152378-18152842	TRUE
cg01822071	0.188929	0.527537	10.8776	5.88496e-05	0.90051	2.58297	0.433072	0.622001	0.188929	16	35027026	F	II		IGR	opensea	IGR-opensea					rs11859244
cg24569624	-0.122141	0.217509	-10.1991	8.29518e-05	0.90051	2.2153	0.27858	0.156438	-0.122141	11	6280804	R	I	CCKBR	TSS200	shore	TSS200-shore	chr11:6281076-6281307		TRUE
cg13912834	0.128216	0.200798	10.1354	8.5759e-05	0.90051	2.17947	0.13669	0.264906	0.128216	8	97464569	F	I		IGR	opensea	IGR-opensea					rs13249995
cg20796611	0.175285	0.679672	10.02	9.11377e-05	0.90051	2.1139	0.59203	0.767315	0.175285	1	18152639	R	II	ACTL8	Body	island	Body-island	chr1:18152378-18152842	TRUE
cg03651877	0.11756	0.733991	9.78318	0.000103456	0.90051	1.97691	0.675211	0.792771	0.11756	1	228003072	F	II	PRSS38	TSS1500	shore	TSS1500-shore	chr1:228003827-228004083
cg11548191	0.241587	0.6148	9.62227	0.000112945	0.90051	1.88185	0.494006	0.735593	0.241587	2	4931898	R	II		IGR	opensea	IGR-opensea
cg25188760	0.117027	0.895132	9.44858	0.000124352	0.90051	1.77739	0.836619	0.953646	0.117027	20	5301547	F	II		IGR	shelf	IGR-shelf	chr20:5296266-5297798
cg20067575	0.232018	0.402443	9.35877	0.000130777	0.90051	1.7226	0.286434	0.518452	0.232018	6	150437072	F	I		IGR	opensea	IGR-opensea
cg04071689	0.224742	0.381925	9.1727	0.000145366	0.90051	1.60739	0.269554	0.494296	0.224742	5	166354050	R	I		IGR	opensea	IGR-opensea
cg16579337	0.18405	0.160865	9.02439	0.00015837	0.90051	1.51387	0.06884	0.25289	0.18405	3	197226149	F	II		IGR	island	IGR-island	chr3:197225631-197226150
cg06870986	0.103963	0.340244	8.96098	0.000164342	0.90051	1.47342	0.288262	0.392225	0.103963	17	70588173	F	II		IGR	island	IGR-island	chr17:70587771-70589080		TRUE		rs76816551
cg14786713	-0.100376	0.274733	-8.66711	0.000195702	0.90051	1.28216	0.324921	0.224545	-0.100376	22	45406130	F	I	PHF21B	TSS1500	island	TSS1500-island	chr22:45403036-45406372
cg12638695	0.220705	0.523563	8.62278	0.000201016	0.90051	1.25277	0.413211	0.633916	0.220705	1	228003393	R	II	PRSS38	TSS200	shore	TSS200-shore	chr1:228003827-228004083
cg20556598	0.100742	0.889861	8.49965	0.000216688	0.90051	1.17032	0.83949	0.940232	0.100742	X	18691243	F	II	RS1	TSS1500	shore	TSS1500-shore	chrX:18693152-18693599
cg19682367	0.117687	0.789208	8.49465	0.000217353	0.90051	1.16696	0.730364	0.848051	0.117687	3	188888486	F	II	TPRG1	TSS1500	opensea	TSS1500-opensea
cg14768087	0.126132	0.78096	8.35246	0.000237332	0.90051	1.07024	0.717894	0.844025	0.126132	3	188888497	F	II	TPRG1	TSS1500	opensea	TSS1500-opensea
cg00400096	0.23889	0.380734	8.1571	0.000268387	0.90051	0.934771	0.261289	0.50018	0.23889	11	41644529	R	I		IGR	opensea	IGR-opensea
cg12680957	0.130936	0.660151	8.05482	0.000286526	0.90051	0.862611	0.594683	0.725619	0.130936	15	64353131	R	I		IGR	opensea	IGR-opensea
cg17221856	0.1116	0.203358	7.80712	0.000336715	0.90051	0.684233	0.147558	0.259158	0.1116	5	180396891	R	II		IGR	shore	IGR-shore	chr5:180397288-180397563
cg22309267	0.202859	0.17318	7.68162	0.000366024	0.90051	0.591834	0.0717505	0.274609	0.202859	3	19791356	F	II		IGR	opensea	IGR-opensea
cg04872717	0.171479	0.158999	7.60629	0.000385042	0.90051	0.53571	0.0732596	0.244738	0.171479	3	197226107	R	II		IGR	island	IGR-island	chr3:197225631-197226150					rs13079460
cg06232075	0.464519	0.424792	7.55844	0.00039772	0.90051	0.499796	0.192533	0.657052	0.464519	4	1256182	R	II		IGR	opensea	IGR-opensea
cg05676251	-0.175652	0.739309	-7.52428	0.000407072	0.90051	0.474022	0.827136	0.651483	-0.175652	16	89225592	F	II	C16orf81	TSS200	shore	TSS200-shore	chr16:89225687-89226195				rs72819325
cg17511532	0.1038	0.39448	7.45083	0.000428055	0.90051	0.418258	0.342581	0.44638	0.1038	7	41356278	R	II		IGR	opensea	IGR-opensea			TRUE			rs77022157
cg22575603	0.190225	0.144465	7.4176	0.000437962	0.90051	0.392862	0.0493521	0.239577	0.190225	10	43332329	R	II		IGR	shore	IGR-shore	chr10:43332387-43332817	TRUE
cg13104844	0.46602	0.412724	7.38171	0.000448962	0.90051	0.365319	0.179714	0.645734	0.46602	4	1256272	R	II		IGR	opensea	IGR-opensea
cg09551343	0.278694	0.431566	7.31904	0.00046895	0.90051	0.31694	0.292219	0.570913	0.278694	15	32215657	F	I		IGR	opensea	IGR-opensea
cg10111716	0.221174	0.316793	7.20783	0.00050703	0.90051	0.230165	0.206206	0.42738	0.221174	6	28972110	R	II	ZNF311	5'UTR	opensea	5'UTR-opensea			TRUE
cg23407804	0.118792	0.352049	7.18613	0.000514874	0.90051	0.213094	0.292653	0.411445	0.118792	5	2668829	F	II		IGR	opensea	IGR-opensea
cg22702979	0.15719	0.28348	7.17745	0.000518053	0.90051	0.206248	0.204885	0.362076	0.15719	2	213586056	F	I		IGR	opensea	IGR-opensea
cg02419835	-0.126642	0.418538	-7.13849	0.000532597	0.90051	0.175451	0.481859	0.355217	-0.126642	5	60625717	R	I		IGR	shore	IGR-shore	chr5:60626505-60629809
cg05498586	-0.174338	0.856772	-7.06046	0.000563175	0.90051	0.113329	0.94394	0.769603	-0.174338	16	89225602	F	II	C16orf81	TSS200	shore	TSS200-shore	chr16:89225687-89226195					rs72819325
cg00185988	0.135379	0.687628	7.05403	0.000565786	0.90051	0.108181	0.619938	0.755317	0.135379	2	169311665	F	II	LASS6	TSS1500	shore	TSS1500-shore	chr2:169312417-169313622					rs12473737
cg19374523	0.24866	0.25144	7.04824	0.000568146	0.90051	0.103546	0.12711	0.37577	0.24866	15	77897134	F	I		IGR	opensea	IGR-opensea		TRUE
cg19372578	0.234923	0.570627	7.04216	0.000570642	0.90051	0.098667	0.453166	0.688089	0.234923	2	4931004	F	II		IGR	opensea	IGR-opensea
cg20353489	0.162782	0.211951	7.01996	0.000579854	0.90051	0.0808385	0.13056	0.293343	0.162782	12	34758307	F	II		IGR	opensea	IGR-opensea					rs74072798
cg00532399	0.158205	0.28306	7.01837	0.00058052	0.90051	0.0795597	0.203958	0.362163	0.158205	5	171209553	R	II		IGR	opensea	IGR-opensea
cg21204020	0.105872	0.819176	6.99151	0.000591911	0.90051	0.0579217	0.76624	0.872112	0.105872	2	3828566	R	II		IGR	opensea	IGR-opensea		TRUE
cg25805368	0.173585	0.404836	6.93604	0.000616265	0.90051	0.0130113	0.318043	0.491628	0.173585	7	1802235	F	II		IGR	opensea	IGR-opensea					rs73042632
cg00290626	0.13393	0.472992	6.93065	0.000618695	0.90051	0.00862726	0.406027	0.539957	0.13393	8	132499131	F	I		IGR	opensea	IGR-opensea
cg17076431	0.181856	0.675864	6.91765	0.0006246	0.90051	-0.00195597	0.584936	0.766792	0.181856	6	49901607	F	II		IGR	opensea	IGR-opensea					rs59021264
cg05036130	0.191851	0.809403	6.91402	0.000626258	0.90051	-0.00490834	0.713477	0.905328	0.191851	6	150231994	R	II		IGR	opensea	IGR-opensea
cg21038291	0.13236	0.765151	6.89631	0.00063443	0.90051	-0.0193552	0.698971	0.831331	0.13236	17	70332630	F	II		IGR	opensea	IGR-opensea			TRUE		rs34564116
cg26603050	0.124159	0.313306	6.87148	0.000646101	0.90051	-0.0396683	0.251226	0.375385	0.124159	1	22938172	R	II		IGR	opensea	IGR-opensea		TRUE	TRUE
cg24332921	0.119612	0.159667	6.8233	0.000669458	0.90051	-0.0792535	0.0998609	0.219473	0.119612	15	26543540	F	I		IGR	opensea	IGR-opensea
cg24526760	0.109278	0.108801	6.68541	0.000741929	0.90051	-0.19389	0.0541625	0.16344	0.109278	5	171209445	F	II		IGR	opensea	IGR-opensea					rs35325575
cg02455706	0.164222	0.767984	6.68437	0.00074251	0.90051	-0.194763	0.685873	0.850094	0.164222	16	84918851	R	II	CRISPLD2	Body	opensea	Body-opensea			TRUE
cg21186296	0.12972	0.347416	6.6131	0.000783551	0.90051	-0.254803	0.282556	0.412276	0.12972	8	27182909	F	II	PTK2B	5'UTR	shore	5'UTR-shore	chr8:27183090-27183390	TRUE
cg01480205	0.460866	0.464552	6.60185	0.00079027	0.90051	-0.264334	0.234119	0.694985	0.460866	4	1256213	R	II		IGR	opensea	IGR-opensea
cg03602360	0.12693	0.209316	6.55303	0.000820203	0.90051	-0.30584	0.145851	0.272781	0.12693	2	79664699	R	II		IGR	opensea	IGR-opensea			TRUE
cg06466757	0.320693	0.384631	6.55041	0.000821848	0.90051	-0.308076	0.224284	0.544977	0.320693	4	1255808	F	I		IGR	opensea	IGR-opensea
cg08547604	0.107708	0.429099	6.52964	0.000835014	0.90051	-0.325823	0.375245	0.482953	0.107708	12	75724725	F	II	CAPS2	TSS1500	shore	TSS1500-shore	chr12:75723829-75724206
cg04839991	0.218293	0.705083	6.4939	0.000858241	0.90051	-0.356465	0.595936	0.81423	0.218293	2	237880790	R	II		IGR	opensea	IGR-opensea			TRUE
cg00601387	0.144365	0.727533	6.49265	0.000859066	0.90051	-0.357538	0.655351	0.799715	0.144365	5	110427072	R	II	WDR36	TSS1500	shore	TSS1500-shore	chr5:110427777-110428270
cg01837113	0.151426	0.606494	6.48447	0.000864497	0.90051	-0.364577	0.530781	0.682207	0.151426	6	28412139	F	II	ZSCAN23	TSS1500	opensea	TSS1500-opensea					rs61331111
cg11688553	0.168442	0.309605	6.48033	0.000867258	0.90051	-0.368139	0.225384	0.393826	0.168442	10	131151653	R	II		IGR	opensea	IGR-opensea
cg16792258	0.123626	0.119297	6.46099	0.000880298	0.90051	-0.38481	0.0574838	0.18111	0.123626	2	239631449	F	II		IGR	opensea	IGR-opensea
cg02561693	0.216	0.539498	6.39814	0.000924271	0.90051	-0.439271	0.431498	0.647499	0.216	2	4931074	F	II		IGR	opensea	IGR-opensea
cg26950279	0.124288	0.333527	6.36107	0.000951397	0.90051	-0.471596	0.271383	0.395671	0.124288	2	213586019	F	II		IGR	opensea	IGR-opensea
cg02883150	0.286176	0.589458	6.35656	0.000954757	0.90051	-0.475537	0.44637	0.732546	0.286176	2	4931115	R	II		IGR	opensea	IGR-opensea
cg00050872	0.110723	0.645721	6.32107	0.000981715	0.90051	-0.506659	0.590359	0.701082	0.110723	7	128092224	F	I		IGR	shelf	IGR-shelf	chr7:128095678-128096197				rs10228542
cg16441144	0.145222	0.686691	6.31316	0.000987835	0.90051	-0.513606	0.61408	0.759302	0.145222	3	130533733	R	I		IGR	opensea	IGR-opensea
cg04918082	0.159784	0.401831	6.28164	0.0010127	0.90051	-0.541394	0.321939	0.481723	0.159784	7	100547176	F	II		IGR	opensea	IGR-opensea			TRUE		rs79277565	rs76728014
cg16651732	-0.105275	0.185286	-6.27938	0.0010145	0.90051	-0.543384	0.237924	0.132649	-0.105275	15	89631057	R	I	ABHD2	TSS1500	shore	TSS1500-shore	chr15:89631546-89632209
cg15075902	0.114749	0.372535	6.27715	0.00101629	0.90051	-0.545354	0.31516	0.429909	0.114749	1	55240609	F	II		IGR	opensea	IGR-opensea			TRUE		rs11206429
cg21097378	0.104466	0.910967	6.27052	0.00102163	0.90051	-0.551219	0.858734	0.9632	0.104466	4	189376670	F	II		IGR	opensea	IGR-opensea					rs28641985	rs28560021
cg10376517	0.112895	0.778847	6.19162	0.00108777	0.90051	-0.621367	0.7224	0.835295	0.112895	1	18153059	R	II	ACTL8	3'UTR	shore	3'UTR-shore	chr1:18152378-18152842	TRUE
cg08800396	0.127018	0.637008	6.16885	0.00110777	0.90051	-0.64174	0.573499	0.700517	0.127018	12	114200279	R	II		IGR	opensea	IGR-opensea			TRUE
cg05273321	0.145786	0.675494	6.08567	0.00118454	0.90051	-0.716699	0.602601	0.748387	0.145786	16	34979575	R	II		IGR	opensea	IGR-opensea
cg00827008	0.224516	0.397795	6.07326	0.00119651	0.90051	-0.72795	0.285537	0.510053	0.224516	16	35026985	F	I		IGR	opensea	IGR-opensea						rs76578591
cg14184164	0.162455	0.691277	6.05431	0.00121507	0.90051	-0.745174	0.610049	0.772504	0.162455	9	30688981	R	I		IGR	opensea	IGR-opensea
cg03260744	0.19954	0.277744	6.036	0.00123332	0.90051	-0.761851	0.177974	0.377514	0.19954	1	36549062	R	II	TEKT2	TSS1500	shore	TSS1500-shore	chr1:36549554-36549965
cg23067090	0.139326	0.428992	5.91162	0.00136599	0.90051	-0.876212	0.359329	0.498655	0.139326	15	25809518	R	II		IGR	opensea	IGR-opensea			TRUE
cg14819942	0.155232	0.215326	5.91101	0.00136669	0.90051	-0.876783	0.13771	0.292942	0.155232	15	35414228	F	II		IGR	island	IGR-island	chr15:35414082-35414314
cg17577431	0.17706	0.592318	5.88369	0.00139802	0.90051	-0.902154	0.503789	0.680848	0.17706	3	175696388	R	II		IGR	opensea	IGR-opensea
cg01206961	0.177589	0.457124	5.84991	0.00143791	0.90051	-0.933655	0.368329	0.545918	0.177589	4	71986754	R	I		IGR	opensea	IGR-opensea
cg20342082	0.209952	0.515086	5.84457	0.00144433	0.90051	-0.938646	0.41011	0.620062	0.209952	1	228003402	R	II	PRSS38	TSS200	shore	TSS200-shore	chr1:228003827-228004083
cg05698294	0.141095	0.168861	5.82185	0.00147205	0.90051	-0.95993	0.0983132	0.239409	0.141095	2	3063249	F	II		IGR	shore	IGR-shore	chr2:3063372-3063672
cg20201675	0.380589	0.701757	5.76588	0.00154299	0.90051	-1.01263	0.511462	0.892051	0.380589	6	112230657	R	II		IGR	opensea	IGR-opensea
cg01196592	0.276643	0.428222	5.75733	0.00155417	0.90051	-1.02072	0.289901	0.566544	0.276643	13	23472283	F	II		IGR	shore	IGR-shore	chr13:23471763-23471969
cg18910548	0.137676	0.422343	5.73898	0.00157849	0.90051	-1.0381	0.353505	0.491181	0.137676	4	178528594	R	I		IGR	opensea	IGR-opensea
cg01282080	0.117921	0.425214	5.69875	0.00163334	0.90051	-1.07636	0.366253	0.484175	0.117921	19	15298078	R	II	NOTCH3	Body	shore	Body-shore	chr19:15299831-15300167	TRUE
cg05523057	0.128921	0.294636	5.69849	0.0016337	0.90051	-1.07661	0.230175	0.359097	0.128921	5	2668571	R	II		IGR	opensea	IGR-opensea
cg24463728	0.203243	0.391383	5.67692	0.00166402	0.90051	-1.09721	0.289762	0.493005	0.203243	4	179059549	R	II		IGR	opensea	IGR-opensea
cg00377924	0.101037	0.381877	5.65729	0.00169219	0.90051	-1.116	0.331359	0.432395	0.101037	3	107535430	F	II		IGR	opensea	IGR-opensea			TRUE
cg04974940	0.123683	0.683844	5.65012	0.00170262	0.90051	-1.12289	0.622002	0.745686	0.123683	14	90993412	F	II		IGR	shore	IGR-shore	chr14:90991767-90991982
cg06637517	0.114605	0.873347	5.58401	0.00180229	0.90051	-1.18661	0.816045	0.930649	0.114605	3	52407344	R	I	DNAH1	Body	opensea	Body-opensea		TRUE
cg14092988	0.115082	0.90085	5.56013	0.00183996	0.90051	-1.20978	0.843309	0.958391	0.115082	3	52407081	R	I	DNAH1	Body	opensea	Body-opensea		TRUE
cg12507643	0.122633	0.622421	5.54884	0.00185806	0.90051	-1.22075	0.561104	0.683737	0.122633	12	15154937	F	II		IGR	opensea	IGR-opensea			TRUE
cg13248789	0.120916	0.824067	5.50452	0.00193119	0.90051	-1.26399	0.763609	0.884526	0.120916	6	775467	F	I		IGR	opensea	IGR-opensea					rs6937708
cg13904527	0.141203	0.659402	5.46717	0.00199541	0.90051	-1.30064	0.5888	0.730003	0.141203	6	141335463	R	II		IGR	opensea	IGR-opensea
cg10412312	0.115211	0.508675	5.45567	0.00201567	0.90051	-1.31196	0.45107	0.566281	0.115211	12	25705861	R	II	IFLTD1	Body	opensea	Body-opensea			TRUE
cg11458974	0.166465	0.384458	5.4401	0.00204349	0.90051	-1.32731	0.301225	0.46769	0.166465	22	35776686	R	II	HMOX1	TSS1500	shore	TSS1500-shore	chr22:35776988-35777221
cg25325501	0.113213	0.138568	5.40322	0.00211116	0.90051	-1.36381	0.0819614	0.195174	0.113213	10	43394647	F	II		IGR	shore	IGR-shore	chr10:43393476-43394417				rs1775055
cg09165554	0.146397	0.375713	5.38984	0.00213635	0.90051	-1.37709	0.302514	0.448912	0.146397	16	33935224	F	II		IGR	shore	IGR-shore	chr16:33936400-33936681	TRUE			rs80223069	rs72802949
cg19878017	-0.181233	0.826955	-5.33054	0.00225222	0.90051	-1.43626	0.917572	0.736339	-0.181233	X	145080188	R	II	MIR892B	TSS1500	opensea	TSS1500-opensea
cg14546523	0.247649	0.731347	5.31779	0.00227807	0.90051	-1.44905	0.607523	0.855172	0.247649	6	150231942	F	I		IGR	opensea	IGR-opensea
cg11707753	0.11405	0.444756	5.28512	0.00234588	0.90051	-1.4819	0.38773	0.501781	0.11405	X	31090939	R	II	FTHL17	TSS1500	shore	TSS1500-shore	chrX:31089886-31090330
cg03610516	0.10058	0.864508	5.26662	0.0023853	0.90051	-1.50057	0.814219	0.914798	0.10058	2	642275	R	II		IGR	opensea	IGR-opensea
cg00446536	0.198548	0.163488	5.26352	0.00239197	0.90051	-1.5037	0.0642139	0.262762	0.198548	2	6636481	R	II		IGR	shore	IGR-shore	chr2:6635949-6636160
cg17627427	0.342598	0.448819	5.21428	0.00250104	0.90051	-1.55364	0.27752	0.620118	0.342598	13	23472381	R	II		IGR	shore	IGR-shore	chr13:23471763-23471969
cg12495996	0.342749	0.274067	5.16564	0.00261442	0.90051	-1.6033	0.102693	0.445442	0.342749	10	132239568	F	II		IGR	opensea	IGR-opensea
cg01897308	0.146951	0.572673	5.08408	0.00281804	0.90051	-1.6873	0.499198	0.646149	0.146951	12	96029861	F	I		IGR	opensea	IGR-opensea			TRUE
cg17356252	0.133123	0.136036	5.07584	0.0028396	0.90051	-1.69584	0.0694749	0.202597	0.133123	21	45705686	R	II	AIRE	TSS200	island	TSS200-island	chr21:45705428-45706044
cg06311103	0.156008	0.414731	5.04997	0.00290857	0.90051	-1.72271	0.336727	0.492735	0.156008	13	31579287	F	II		IGR	opensea	IGR-opensea					rs57674214
cg11815473	0.157679	0.520017	5.04221	0.00292962	0.90051	-1.73078	0.441178	0.598856	0.157679	7	135771715	R	II		IGR	opensea	IGR-opensea		TRUE	TRUE
cg23277490	0.266982	0.278794	5.0416	0.0029313	0.90051	-1.73143	0.145303	0.412285	0.266982	4	187810613	F	II		IGR	island	IGR-island	chr4:187810427-187810735				rs77929353
cg13881452	0.129472	0.777893	5.03161	0.00295868	0.90051	-1.74184	0.713157	0.842629	0.129472	6	169601968	R	II		IGR	opensea	IGR-opensea
cg19146767	0.108794	0.209889	5.00588	0.00303058	0.90051	-1.76872	0.155492	0.264286	0.108794	6	142352423	R	II		IGR	opensea	IGR-opensea					rs11967408
cg02151408	0.206487	0.843578	5.00143	0.0030432	0.90051	-1.77337	0.740335	0.946822	0.206487	X	18690814	F	II	RS1	TSS1500	shelf	TSS1500-shelf	chrX:18693152-18693599				rs5955507	rs5955506
cg12176605	0.107406	0.117164	4.98183	0.0030996	0.90051	-1.79393	0.0634606	0.170867	0.107406	3	40518138	F	II	ZNF619	TSS1500	shore	TSS1500-shore	chr3:40518517-40518848
cg02954562	0.117724	0.464391	4.97448	0.00312103	0.90051	-1.80165	0.405528	0.523253	0.117724	12	6649806	R	II	IFFO1	Body	island	Body-island	chr12:6649677-6649897	TRUE
cg18221128	-0.11099	0.430422	-4.96752	0.0031415	0.90051	-1.80897	0.485917	0.374927	-0.11099	13	20735236	F	I	GJA3	TSS200	island	TSS200-island	chr13:20735043-20736157	TRUE
cg12581547	0.523747	0.418512	4.93717	0.00323258	0.90051	-1.84096	0.156638	0.680385	0.523747	1	62657689	R	I		IGR	shelf	IGR-shelf	chr1:62660555-62660946
cg06581201	0.152487	0.400115	4.92449	0.00327154	0.90051	-1.85437	0.323871	0.476359	0.152487	6	168534038	R	II		IGR	shelf	IGR-shelf	chr6:168529982-168530307	TRUE
cg11569431	0.131354	0.6144	4.92238	0.00327806	0.90051	-1.8566	0.548723	0.680077	0.131354	19	45540995	R	II	SFRS16	TSS1500	island	TSS1500-island	chr19:45540657-45541055
cg14536517	0.486179	0.412098	4.92198	0.00327933	0.90051	-1.85703	0.169009	0.655188	0.486179	10	132239501	F	II		IGR	opensea	IGR-opensea
cg26884038	0.146122	0.293227	4.91566	0.00329899	0.90051	-1.86372	0.220167	0.366288	0.146122	10	83262539	F	I		IGR	opensea	IGR-opensea
cg27550618	0.111043	0.511573	4.87401	0.00343203	0.90051	-1.90797	0.456052	0.567095	0.111043	3	175696286	F	I		IGR	opensea	IGR-opensea					rs79543182
cg11127569	0.105897	0.146367	4.8581	0.00348446	0.90051	-1.92494	0.0934181	0.199315	0.105897	2	6636403	F	II		IGR	shore	IGR-shore	chr2:6635949-6636160				rs35856990
cg08185075	0.10799	0.687972	4.84966	0.00351264	0.90051	-1.93396	0.633977	0.741967	0.10799	2	119231686	F	II		IGR	opensea	IGR-opensea			TRUE		rs75891058
cg19214658	0.148868	0.789742	4.84289	0.00353545	0.90051	-1.9412	0.715308	0.864176	0.148868	13	112892641	F	II		IGR	shelf	IGR-shelf	chr13:112895427-112895708				rs2576492
cg22460173	0.131802	0.259334	4.82102	0.00361026	0.90051	-1.96463	0.193433	0.325235	0.131802	19	6536042	F	II		IGR	shore	IGR-shore	chr19:6534759-6535079	TRUE
cg04088674	0.118768	0.832971	4.80495	0.00366641	0.90051	-1.9819	0.773587	0.892355	0.118768	5	112953153	R	II		IGR	opensea	IGR-opensea
cg14568552	0.165607	0.733419	4.79925	0.00368654	0.90051	-1.98803	0.650616	0.816223	0.165607	13	112892884	F	II		IGR	shelf	IGR-shelf	chr13:112895427-112895708				rs2774104
cg14037397	0.150696	0.784836	4.79738	0.00369317	0.90051	-1.99004	0.709488	0.860184	0.150696	6	775503	R	II		IGR	opensea	IGR-opensea
cg26248066	0.227614	0.543081	4.79265	0.00371004	0.90051	-1.99514	0.429274	0.656888	0.227614	11	70303464	F	II		IGR	opensea	IGR-opensea
cg01438286	0.170127	0.177368	4.78829	0.00372563	0.90051	-1.99983	0.0923049	0.262432	0.170127	1	249200039	R	II	PGBD2	TSS1500	shore	TSS1500-shore	chr1:249200252-249200721
cg14215689	0.110292	0.519034	4.78736	0.00372897	0.90051	-2.00083	0.463888	0.57418	0.110292	9	139334807	R	II	INPP5E	TSS1500	shore	TSS1500-shore	chr9:139332839-139334501
cg25072393	0.145006	0.16981	4.77985	0.00375609	0.90051	-2.00894	0.097307	0.242313	0.145006	4	187810222	F	II		IGR	shore	IGR-shore	chr4:187810427-187810735
cg13595211	0.105226	0.174088	4.77104	0.00378816	0.90051	-2.01845	0.121475	0.226701	0.105226	7	57880009	R	II		IGR	opensea	IGR-opensea
cg06815112	0.129724	0.375758	4.75777	0.00383707	0.90051	-2.0328	0.310897	0.44062	0.129724	8	27182871	R	II	PTK2B	TSS1500	shore	TSS1500-shore	chr8:27183090-27183390	TRUE
cg06268510	0.245149	0.594933	4.73721	0.00391427	0.90051	-2.05508	0.472359	0.717508	0.245149	11	70303307	F	II		IGR	opensea	IGR-opensea
cg09967633	0.170315	0.636193	4.7062	0.00403409	0.90051	-2.08881	0.551035	0.721351	0.170315	16	84918794	F	II	CRISPLD2	Body	opensea	Body-opensea			TRUE		rs78455580	rs77103422
cg13160528	0.100316	0.124984	4.70544	0.00403707	0.90051	-2.08963	0.0748262	0.175142	0.100316	6	166140118	F	II		IGR	island	IGR-island	chr6:166140001-166140293
cg01269798	0.104431	0.123228	4.67682	0.00415149	0.90051	-2.12088	0.0710124	0.175444	0.104431	6	28972065	F	I	ZNF311	5'UTR	opensea	5'UTR-opensea			TRUE		rs9257456
cg11257324	0.238381	0.803723	4.66566	0.00419711	0.90051	-2.13311	0.684533	0.922914	0.238381	6	150232174	R	II		IGR	opensea	IGR-opensea
cg05822658	0.159299	0.299305	4.65662	0.00423449	0.90051	-2.14302	0.219656	0.378955	0.159299	10	131151594	R	II		IGR	opensea	IGR-opensea
cg12091936	0.268963	0.636055	4.65592	0.00423738	0.90051	-2.14378	0.501574	0.770537	0.268963	11	70303534	F	II		IGR	opensea	IGR-opensea
cg08305942	0.134916	0.867826	4.64463	0.00428466	0.90051	-2.15619	0.800368	0.935284	0.134916	16	79692354	R	II		IGR	opensea	IGR-opensea
cg07845136	0.182735	0.203927	4.63556	0.00432304	0.90051	-2.16616	0.112559	0.295294	0.182735	4	187810446	F	II		IGR	island	IGR-island	chr4:187810427-187810735
cg18234130	0.114957	0.342869	4.62303	0.00437671	0.90051	-2.17995	0.285391	0.400348	0.114957	8	27182889	R	II	PTK2B	5'UTR	shore	5'UTR-shore	chr8:27183090-27183390	TRUE
cg24613956	0.111401	0.220272	4.60807	0.00444181	0.90051	-2.19645	0.164571	0.275972	0.111401	6	42186179	F	II	MRPS10	TSS1500	opensea	TSS1500-opensea
cg25140783	0.125608	0.473797	4.60553	0.00445298	0.90051	-2.19926	0.410993	0.536601	0.125608	1	24861872	F	I	RCAN3	3'UTR	island	3'UTR-island	chr1:24861702-24861920		TRUE
cg22824376	0.151435	0.273203	4.59666	0.00449221	0.90051	-2.20907	0.197486	0.348921	0.151435	14	77648248	R	II	TMEM63C	5'UTR	island	5'UTR-island	chr14:77648108-77648328	TRUE				rs35484514
cg12716346	0.109479	0.264505	4.59078	0.00451845	0.90051	-2.21558	0.209765	0.319244	0.109479	4	187810656	R	I		IGR	island	IGR-island	chr4:187810427-187810735					rs77929353
cg22167353	0.123609	0.27016	4.58413	0.00454833	0.90051	-2.22294	0.208356	0.331965	0.123609	16	84029457	R	II	NECAB2	Body	island	Body-island	chr16:84029456-84029710		TRUE
cg23935255	0.112689	0.859602	4.57987	0.00456755	0.90051	-2.22765	0.803257	0.915946	0.112689	14	101492264	R	I	MIR758	TSS200	opensea	TSS200-opensea
cg06761850	0.191575	0.77677	4.57388	0.00459481	0.90051	-2.2343	0.680983	0.872558	0.191575	14	102904469	R	II	TECPR2	Body	opensea	Body-opensea			TRUE			rs12890730
cg11199751	0.487476	0.370638	4.57157	0.00460535	0.90051	-2.23686	0.1269	0.614376	0.487476	10	132239858	F	II		IGR	opensea	IGR-opensea
cg22712883	0.185514	0.273849	4.54269	0.00473963	0.90051	-2.26898	0.181092	0.366605	0.185514	13	31579374	F	I		IGR	opensea	IGR-opensea					rs7328741
cg15458637	0.298152	0.403722	4.53317	0.00478486	0.90051	-2.27959	0.254646	0.552798	0.298152	13	23471766	R	II		IGR	island	IGR-island	chr13:23471763-23471969
cg11510515	0.12663	0.206572	4.53076	0.00479637	0.90051	-2.28227	0.143256	0.269887	0.12663	4	187811125	R	II		IGR	shore	IGR-shore	chr4:187810427-187810735
cg07483007	0.128212	0.487405	4.51869	0.00485461	0.90051	-2.29576	0.423299	0.551511	0.128212	3	125567161	F	II		IGR	opensea	IGR-opensea
cg16757896	0.131514	0.736167	4.51591	0.00486814	0.90051	-2.29887	0.67041	0.801924	0.131514	4	179059757	F	II		IGR	opensea	IGR-opensea					rs55634737
cg27467275	0.309906	0.44472	4.51278	0.00488341	0.90051	-2.30237	0.289767	0.599673	0.309906	10	1245261	F	II	ADARB2	Body	opensea	Body-opensea			TRUE
cg20138404	0.114562	0.240832	4.48612	0.00501578	0.90051	-2.33224	0.183551	0.298113	0.114562	11	64951798	R	I	CAPN1	Body	island	Body-island	chr11:64951724-64952035		TRUE
cg14698025	0.270379	0.513949	4.47521	0.00507109	0.90051	-2.34449	0.378759	0.649138	0.270379	10	1245418	R	II	ADARB2	Body	opensea	Body-opensea			TRUE
cg22840251	0.116548	0.37263	4.46152	0.00514153	0.90051	-2.35989	0.314356	0.430904	0.116548	X	100645007	F	II	RPL36A	TSS1500	shore	TSS1500-shore	chrX:100645780-100646107
cg02652018	0.114576	0.136787	4.45617	0.00516934	0.90051	-2.36591	0.0794993	0.194075	0.114576	7	45188275	F	II		IGR	opensea	IGR-opensea
cg16806891	0.145083	0.491978	4.44556	0.00522508	0.90051	-2.37789	0.419436	0.56452	0.145083	4	182425400	F	I		IGR	opensea	IGR-opensea			TRUE
cg17056747	0.102965	0.230988	4.44467	0.00522974	0.90051	-2.37889	0.179505	0.282471	0.102965	2	215045	R	II		IGR	shore	IGR-shore	chr2:214011-214245
cg07007312	0.249919	0.408322	4.44143	0.00524695	0.90051	-2.38255	0.283363	0.533282	0.249919	4	961505	F	II	DGKQ	Body	island	Body-island	chr4:961347-962155	TRUE	TRUE
cg04847825	0.41534	0.335335	4.43676	0.00527175	0.90051	-2.38782	0.127665	0.543005	0.41534	10	132239652	F	II		IGR	opensea	IGR-opensea
cg04621728	0.157465	0.189951	4.43646	0.0052734	0.90051	-2.38817	0.111218	0.268683	0.157465	2	234934131	F	II		IGR	opensea	IGR-opensea			TRUE
cg00605001	0.115814	0.72523	4.43475	0.00528254	0.90051	-2.3901	0.667323	0.783137	0.115814	6	88986261	R	II		IGR	opensea	IGR-opensea
cg16289491	0.166455	0.223855	4.42571	0.0053311	0.90051	-2.40032	0.140627	0.307082	0.166455	5	132383297	R	II		IGR	shelf	IGR-shelf	chr5:132387100-132388369
cg07216194	0.171217	0.326705	4.41177	0.00540704	0.90051	-2.4161	0.241096	0.412313	0.171217	8	27182965	F	II	PTK2B	5'UTR	shore	5'UTR-shore	chr8:27183090-27183390	TRUE
cg07974440	0.192084	0.353324	4.40734	0.00543142	0.90051	-2.42113	0.257282	0.449366	0.192084	2	108008848	F	I		IGR	opensea	IGR-opensea						rs71419361
cg22335340	-0.100255	0.345914	-4.38687	0.00554578	0.90051	-2.44438	0.396041	0.295787	-0.100255	12	7055153	F	II	PTPN6	TSS1500	shore	TSS1500-shore	chr12:7053149-7053927	TRUE
cg04077795	0.189119	0.354886	4.38681	0.00554609	0.90051	-2.44444	0.260326	0.449445	0.189119	16	9857925	R	II	GRIN2A	Body	opensea	Body-opensea			TRUE
cg07397503	0.343983	0.388848	4.38231	0.00557162	0.90051	-2.44957	0.216856	0.560839	0.343983	13	23471764	R	II		IGR	island	IGR-island	chr13:23471763-23471969
cg06638529	0.10225	0.753545	4.37264	0.00562685	0.90051	-2.46058	0.70242	0.80467	0.10225	1	44704073	R	II	ERI3	Body	opensea	Body-opensea		TRUE
cg04205616	0.121469	0.882599	4.3676	0.0056559	0.90051	-2.46632	0.821864	0.943333	0.121469	16	79692516	F	II		IGR	opensea	IGR-opensea
cg02372577	0.26808	0.339179	4.35569	0.00572527	0.90051	-2.47992	0.205139	0.473219	0.26808	13	23471968	F	I		IGR	island	IGR-island	chr13:23471763-23471969
cg00436996	0.241376	0.323742	4.34355	0.00579688	0.90051	-2.49379	0.203054	0.44443	0.241376	2	77962212	F	I		IGR	opensea	IGR-opensea					rs10166757
cg18527470	0.369776	0.294445	4.33811	0.00582933	0.90051	-2.50002	0.109557	0.479333	0.369776	14	104917157	R	II		IGR	opensea	IGR-opensea
cg03997167	0.158361	0.187944	4.33594	0.00584237	0.90051	-2.50251	0.108764	0.267124	0.158361	2	2829723	R	I		IGR	opensea	IGR-opensea
cg01023593	0.143643	0.697438	4.32621	0.00590101	0.90051	-2.51365	0.625617	0.76926	0.143643	19	58962093	F	II	ZNF324B	TSS1500	shore	TSS1500-shore	chr19:58962740-58963343				rs79196050
cg12302428	0.105017	0.422234	4.32527	0.00590677	0.90051	-2.51474	0.369726	0.474743	0.105017	19	52408520	F	II	ZNF649	TSS1500	opensea	TSS1500-opensea		TRUE
cg21855143	0.244721	0.371726	4.31879	0.00594625	0.90051	-2.52217	0.249366	0.494087	0.244721	1	240088252	R	II		IGR	opensea	IGR-opensea
cg10350607	0.233445	0.739397	4.28344	0.00616709	0.90051	-2.56283	0.622675	0.85612	0.233445	8	2741025	F	I		IGR	opensea	IGR-opensea					rs77663846
cg03228766	0.128082	0.147217	4.27695	0.00620863	0.90051	-2.57032	0.0831757	0.211258	0.128082	7	57878945	F	II		IGR	opensea	IGR-opensea
cg24866706	0.242619	0.360532	4.26899	0.00626001	0.90051	-2.57951	0.239222	0.481841	0.242619	3	96338474	F	II		IGR	opensea	IGR-opensea
cg10973513	0.108999	0.265558	4.26307	0.00629857	0.90051	-2.58635	0.211059	0.320058	0.108999	2	108085912	R	I		IGR	opensea	IGR-opensea
cg19028997	0.132708	0.355542	4.23183	0.00650645	0.90051	-2.62254	0.289188	0.421896	0.132708	1	205603040	R	II	ELK4	TSS1500	shore	TSS1500-shore	chr1:205600493-205601432
cg09286409	0.118359	0.657584	4.21033	0.00665405	0.90051	-2.64754	0.598404	0.716763	0.118359	2	117829225	R	I		IGR	opensea	IGR-opensea
cg04383979	0.297357	0.484748	4.20413	0.00669734	0.90051	-2.65476	0.336069	0.633426	0.297357	16	6692245	R	II	A2BP1	5'UTR	opensea	5'UTR-opensea			TRUE
cg15195541	0.224873	0.649225	4.1987	0.00673548	0.90051	-2.66109	0.536788	0.761661	0.224873	8	4188646	R	II	CSMD1	Body	opensea	Body-opensea			TRUE
cg06780080	0.105245	0.573016	4.17839	0.00688041	0.90051	-2.6848	0.520393	0.625638	0.105245	3	158991378	R	II	SCHIP1	TSS200	opensea	TSS200-opensea
cg25363807	0.166082	0.677321	4.16915	0.00694748	0.90051	-2.69561	0.59428	0.760362	0.166082	1	44703923	R	I	ERI3	Body	opensea	Body-opensea		TRUE
cg19595886	0.126712	0.122047	4.16693	0.00696375	0.90051	-2.69821	0.0586909	0.185403	0.126712	7	57714385	R	II		IGR	opensea	IGR-opensea
cg13031210	-0.102437	0.175438	-4.15485	0.00705283	0.90051	-2.71237	0.226657	0.12422	-0.102437	12	45444902	R	I	DBX2	TSS200	island	TSS200-island	chr12:45444202-45445386		TRUE
cg25022271	0.219726	0.471683	4.15439	0.0070562	0.90051	-2.7129	0.36182	0.581546	0.219726	12	130420604	R	I		IGR	opensea	IGR-opensea
cg27161852	0.116435	0.317515	4.15082	0.00708283	0.90051	-2.71709	0.259298	0.375732	0.116435	7	64408298	F	II		IGR	island	IGR-island	chr7:64407589-64408299
cg02814552	0.134684	0.243563	4.14659	0.00711449	0.90051	-2.72206	0.176221	0.310905	0.134684	15	27960031	F	II		IGR	opensea	IGR-opensea
cg09214616	0.120902	0.418732	4.14084	0.00715774	0.90051	-2.7288	0.358281	0.479183	0.120902	6	168533375	F	I		IGR	shelf	IGR-shelf	chr6:168529982-168530307	TRUE	TRUE		rs79904101	rs76301652
cg18685773	0.201828	0.440661	4.13987	0.00716509	0.90051	-2.72995	0.339747	0.541575	0.201828	17	3750286	F	II	C17orf85	TSS1500	shore	TSS1500-shore	chr17:3749138-3749778
cg18326115	0.114007	0.380976	4.1376	0.00718231	0.90051	-2.73262	0.323973	0.43798	0.114007	1	172717488	F	I		IGR	opensea	IGR-opensea
cg19630539	0.10474	0.0902937	4.13159	0.00722803	0.90051	-2.73968	0.037924	0.142663	0.10474	19	53426388	F	II		IGR	island	IGR-island	chr19:53426078-53426389
cg25765027	0.113304	0.431075	4.12854	0.00725138	0.90051	-2.74327	0.374423	0.487727	0.113304	8	46940943	R	II		IGR	opensea	IGR-opensea
cg21705600	0.107132	0.855526	4.11698	0.00734058	0.90051	-2.75688	0.80196	0.909092	0.107132	22	50062693	F	II		IGR	shore	IGR-shore	chr22:50064655-50064984
cg08165879	0.125131	0.243449	4.11582	0.00734959	0.90051	-2.75825	0.180884	0.306014	0.125131	6	9041308	R	II		IGR	opensea	IGR-opensea						rs62393146
cg14870948	0.156995	0.461218	4.11534	0.00735335	0.90051	-2.75882	0.382721	0.539716	0.156995	5	96421037	R	I		IGR	opensea	IGR-opensea					rs172725
cg07758404	0.160924	0.304876	4.08734	0.00757507	0.90051	-2.79187	0.224414	0.385338	0.160924	5	138928980	R	I		IGR	opensea	IGR-opensea
cg04375225	0.144607	0.55511	4.07795	0.00765111	0.90051	-2.80299	0.482806	0.627413	0.144607	6	126868035	F	II		IGR	opensea	IGR-opensea			TRUE
cg19569074	0.173102	0.357514	4.07139	0.0077048	0.90051	-2.81077	0.270963	0.444065	0.173102	7	4347499	R	II		IGR	shore	IGR-shore	chr7:4347707-4348017
cg04344021	0.185894	0.465007	4.05059	0.0078777	0.90051	-2.83545	0.37206	0.557954	0.185894	10	1245481	R	I	ADARB2	Body	opensea	Body-opensea			TRUE
cg08573003	0.312114	0.556364	4.04847	0.00789557	0.90051	-2.83797	0.400307	0.712421	0.312114	7	154888477	F	I		IGR	opensea	IGR-opensea
cg24933473	0.210021	0.554901	4.04712	0.00790704	0.90051	-2.83958	0.449891	0.659912	0.210021	6	448959	F	II		IGR	opensea	IGR-opensea
cg20634514	0.165071	0.742102	4.04308	0.00794128	0.90051	-2.84439	0.659567	0.824638	0.165071	1	44703750	F	II	ERI3	Body	opensea	Body-opensea		TRUE
cg24947379	0.445545	0.361073	4.02655	0.00808313	0.90051	-2.86407	0.138301	0.583846	0.445545	10	132239734	F	II		IGR	opensea	IGR-opensea
cg24677472	0.155689	0.604971	4.02353	0.00810936	0.90051	-2.86767	0.527127	0.682816	0.155689	5	84126275	R	II		IGR	opensea	IGR-opensea
cg10143581	0.104103	0.284574	4.02243	0.00811893	0.90051	-2.86899	0.232523	0.336626	0.104103	6	154359967	F	II	OPRM1	TSS1500	shore	TSS1500-shore	chr6:154360586-154361008				rs79862455
cg19666541	0.12167	0.329881	4.02054	0.00813538	0.90051	-2.87124	0.269046	0.390717	0.12167	15	31516111	R	II		IGR	opensea	IGR-opensea			TRUE
cg20992785	0.154735	0.437151	4.00837	0.00824244	0.90051	-2.88577	0.359783	0.514518	0.154735	6	168533507	F	II		IGR	shelf	IGR-shelf	chr6:168529982-168530307	TRUE	TRUE
cg10064491	0.121886	0.700611	4.00679	0.00825643	0.90051	-2.88765	0.639668	0.761554	0.121886	2	202669896	R	II	CDK15	TSS1500	opensea	TSS1500-opensea
cg05999828	0.137458	0.730657	4.00473	0.00827479	0.90051	-2.89012	0.661928	0.799386	0.137458	3	41620569	R	II	ULK4	Body	opensea	Body-opensea			TRUE
cg10680978	0.237901	0.642524	4.00114	0.0083068	0.90051	-2.89441	0.523573	0.761474	0.237901	6	449044	R	II		IGR	opensea	IGR-opensea						rs78133484
cg00655525	0.130125	0.626219	3.97455	0.00854842	0.90051	-2.92627	0.561157	0.691281	0.130125	5	60038293	F	II		IGR	shore	IGR-shore	chr5:60039587-60039835
cg25598086	0.108925	0.131992	3.95773	0.00870537	0.90051	-2.94648	0.0775301	0.186455	0.108925	14	65006720	F	II	HSPA2	TSS1500	shore	TSS1500-shore	chr14:65006874-65009197				rs2045022
cg09385632	0.108962	0.530436	3.9493	0.0087852	0.90051	-2.95662	0.475955	0.584917	0.108962	17	62917327	R	II		IGR	shore	IGR-shore	chr17:62915055-62916037				rs2668706
cg05630208	0.181939	0.586561	3.94603	0.00881642	0.90051	-2.96056	0.495592	0.677531	0.181939	11	126032897	R	II		IGR	opensea	IGR-opensea		TRUE	TRUE
cg26088680	0.22569	0.628626	3.93576	0.00891519	0.90051	-2.97293	0.515782	0.741471	0.22569	14	95359766	R	II		IGR	opensea	IGR-opensea			TRUE
cg24912902	0.129819	0.831455	3.93569	0.00891589	0.90051	-2.97302	0.766546	0.896364	0.129819	2	121301738	F	II		IGR	opensea	IGR-opensea					rs6721532
cg19772066	0.150698	0.630486	3.93385	0.00893375	0.90051	-2.97524	0.555137	0.705836	0.150698	19	44953982	R	II	ZNF229	TSS1500	shore	TSS1500-shore	chr19:44952416-44952809
cg12744447	0.100673	0.790857	3.93028	0.00896844	0.90051	-2.97955	0.74052	0.841194	0.100673	1	221438146	R	II		IGR	opensea	IGR-opensea			TRUE
cg27651238	0.158494	0.226887	3.9224	0.00904565	0.90051	-2.98906	0.14764	0.306134	0.158494	12	52644264	R	I		IGR	island	IGR-island	chr12:52643982-52644411
cg02829696	0.100507	0.718426	3.91747	0.00909439	0.90051	-2.99503	0.668173	0.768679	0.100507	2	134744765	R	II		IGR	opensea	IGR-opensea			TRUE
cg25997426	0.105529	0.55173	3.91426	0.00912619	0.90051	-2.9989	0.498965	0.604494	0.105529	17	56566962	F	II	HSF5	TSS1500	shore	TSS1500-shore	chr17:56564854-56565891				rs71688891
cg08768904	0.171955	0.418102	3.90894	0.00917926	0.90051	-3.00534	0.332124	0.504079	0.171955	11	46389578	R	II	DGKZ	Body	shore	Body-shore	chr11:46387905-46388535	TRUE	TRUE
cg11794356	-0.35683	0.577538	-3.9004	0.00926514	0.90051	-3.01567	0.755953	0.399123	-0.35683	12	55725991	R	II	OR6C3	1stExon	opensea	1stExon-opensea			TRUE
cg20456258	0.191642	0.191185	3.89741	0.00929545	0.90051	-3.0193	0.0953642	0.287006	0.191642	4	962124	F	I	DGKQ	Body	island	Body-island	chr4:961347-962155	TRUE	TRUE
cg17625256	0.121553	0.147561	3.89426	0.00932749	0.90051	-3.02312	0.0867844	0.208337	0.121553	6	150436654	R	I		IGR	opensea	IGR-opensea
cg02575937	0.108518	0.166701	3.89346	0.00933569	0.90051	-3.02409	0.112441	0.22096	0.108518	1	36549025	F	II	TEKT2	TSS1500	shore	TSS1500-shore	chr1:36549554-36549965
cg17576979	0.146825	0.565288	3.88946	0.00937652	0.90051	-3.02894	0.491876	0.638701	0.146825	6	156829046	F	II		IGR	opensea	IGR-opensea
cg12397768	0.210039	0.412148	3.88463	0.00942624	0.90051	-3.0348	0.307129	0.517168	0.210039	6	28972377	R	II	ZNF311	5'UTR	opensea	5'UTR-opensea			TRUE
cg01579479	0.113755	0.80487	3.87583	0.00951746	0.90051	-3.04549	0.747993	0.861748	0.113755	5	145729596	R	II		IGR	shelf	IGR-shelf	chr5:145725286-145725852
cg11907477	0.151383	0.541796	3.87195	0.00955806	0.90051	-3.05021	0.466105	0.617488	0.151383	6	156828989	F	II		IGR	opensea	IGR-opensea
cg14497223	0.102194	0.389333	3.87115	0.00956638	0.90051	-3.05118	0.338236	0.44043	0.102194	6	168534096	R	I		IGR	shelf	IGR-shelf	chr6:168529982-168530307	TRUE
cg11143674	0.170482	0.227907	3.86684	0.00961171	0.90051	-3.05642	0.142666	0.313148	0.170482	15	99069100	F	II		IGR	opensea	IGR-opensea			TRUE
cg02038558	0.121943	0.394467	3.86224	0.00966029	0.90051	-3.06201	0.333495	0.455438	0.121943	15	77897206	F	II		IGR	opensea	IGR-opensea					rs73450956
cg26308012	0.12694	0.325772	3.86015	0.00968248	0.90051	-3.06456	0.262302	0.389242	0.12694	8	141359592	F	II	TRAPPC9	Body	island	Body-island	chr8:141359155-141359621		TRUE
cg26542166	0.101976	0.786673	3.85973	0.00968695	0.90051	-3.06507	0.735685	0.837661	0.101976	6	3618422	F	II		IGR	opensea	IGR-opensea
cg05418395	0.143069	0.696891	3.85964	0.00968791	0.90051	-3.06518	0.625357	0.768426	0.143069	2	58689455	R	II		IGR	opensea	IGR-opensea
cg17651855	0.171641	0.754169	3.84981	0.00979317	0.90051	-3.07716	0.668349	0.839989	0.171641	11	109920791	F	II		IGR	opensea	IGR-opensea					rs11213242	rs76427209
cg03619635	0.189672	0.620164	3.84819	0.00981063	0.90051	-3.07914	0.525328	0.715	0.189672	15	35529169	F	II	LOC723972	TSS1500	opensea	TSS1500-opensea
cg05596350	0.13209	0.321235	3.84142	0.00988389	0.90051	-3.08739	0.25519	0.387281	0.13209	7	1802343	R	I		IGR	opensea	IGR-opensea
