# Supplementary material for: Comprehensive analysis of DNA methylation patterns in recurrent miscarriage: imprinted/non-imprinted genes and their regulation across sperm and fetal-maternal tissues
Source: PeerJ. 2025 Oct 7;13:e20125. doi: 10.7717/peerj.20125 (PMC12513379; doi:10.7717/peerj.20125)
Supplement: Supplemental Information 7 [file peerj-13-20125-s007.xlsx]

## Sheet: icr_dmps
Table S6. The DMP in intergenic regions harboring imprinting control regions (ICRs) between recurrent miscarriage (RM) and artificial accidental termination of pregnancy (AA) groups.
probe	logFC	AveExpr	t	P.Value	adj.P.Val	B	AA_AVG	RM_AVG	deltaBeta	CHR	MAPINFO	Strand	Type	gene	feature	cgi	feat.cgi	UCSC_CpG_Islands_Name	DHS	Enhancer	Phantom	Probe_SNPs	Probe_SNPs_10	ID	Genomic.Coordinates	Parental.Origin.of.Methylation	Nearest.Transcript	Distance.to.Nearest.Transcript	Sample_Source
cg06627334	0.132502	0.319436	3.39772	0.00393865	0.091677	-2.56881	0.253185	0.385688	0.132502	5	141339748	F	I	PCDH12	TSS1500	opensea	TSS1500-opensea			TRUE		rs164079		ICR_339	chr5:141339675-141339766	M**	PCDHGA1-2	0	chorionic villi
cg10143581	0.104103	0.284574	4.02243	0.00811893	0.90051	-2.86899	0.232523	0.336626	0.104103	6	154359967	F	II	OPRM1	TSS1500	shore	TSS1500-shore	chr6:154360586-154361008				rs79862455		ICR_408	chr6:154359181-154360192		IPCEF1	2415	sperm
cg19256731	-0.152011	0.387578	-3.73017	0.0019605	0.17776	-1.85953	0.492085	0.340074	0.152011	20	1874527	F	I	SIRPA	TSS1500	shore	TSS1500-shore	chr20:1874933-1875718						ICR_1150	chr20:1874501-1874963	P**	SIRPA	19204	decidua
cg07970752	0.11	0.405338	3.4347	0.00361012	0.195672	-2.46396	0.329713	0.439713	-0.11	16	817463	R	I	MSLN	Body	opensea	Body-opensea		TRUE					ICR_920	chr16:817208-818000	M	PRR25	3347	decidua
cg24134897	0.13658	0.485288	3.08637	0.0074059	0.22407	-3.16824	0.391389	0.527969	-0.13658	11	859670	F	I	TSPAN4	5'UTR	shore	5'UTR-shore	chr11:858575-858932	TRUE	TRUE				ICR_714	chr11:859644-859722		TSPAN4	0	decidua
